# Supplementary material for: Atropostatin: Design and Total Synthesis of an Atropisomeric Lactone–Atorvastatin Prodrug
Source: MDPI journal article supplement (doi:10.3390/molecules28073176), 2023-04-03
Supplement: s1 [file s1]

# Atropostatin: Design and Total Synthesis of an Atropisomeric Lactone–Atorvastatin Prodrug

Daniel Pecorari, Andrea Mazzanti and Michele Mancinelli \*

Department of Industrial Chemistry “Toso Montanari”, University of Bologna, Viale del Risorgimento 4,  
40136 Bologna, Italy; daniel.pecorari2@unibo.it (D.P.); andrea.mazzanti@unibo.it (A.M.)

\* Correspondence: michele.mancinelli@unibo.it

## Table of content

|                                                     |          |
|-----------------------------------------------------|----------|
| Kinetic studies.....                                | S2-S7    |
| ECD calculations.....                               | S8       |
| Scheme of synthesis .....                           | S9-S15   |
| CSP-HPLC chromatograms .....                        | S15-S16  |
| Molecular Docking.....                              | S17      |
| NMR spectra .....                                   | S18-S65  |
| DFT calculated geometries for model compounds ..... | S66-S146 |

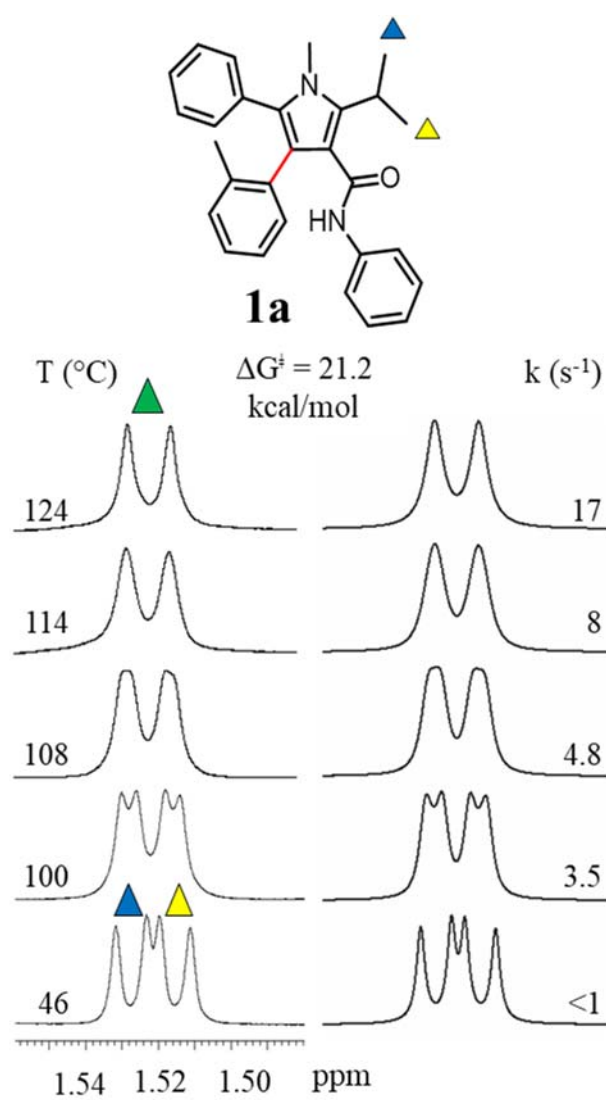

**Figure S1.** VT-NMR on Methyl of *i*-Pr of pyrrole **1a**.

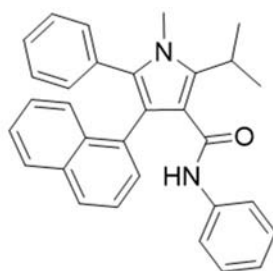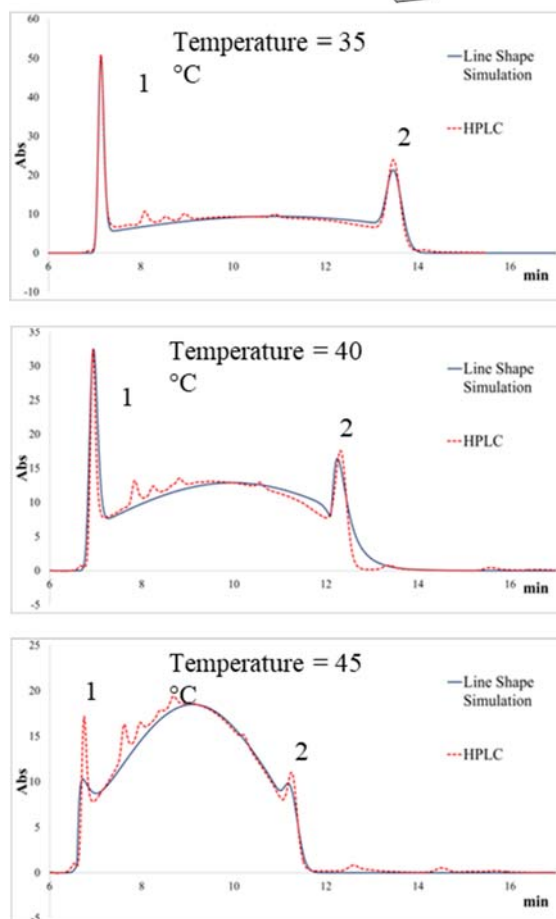

**Figure S2.** D-HPLC of atorvastatin model **1b** at +35 °C, +40 °C and +45 °C.

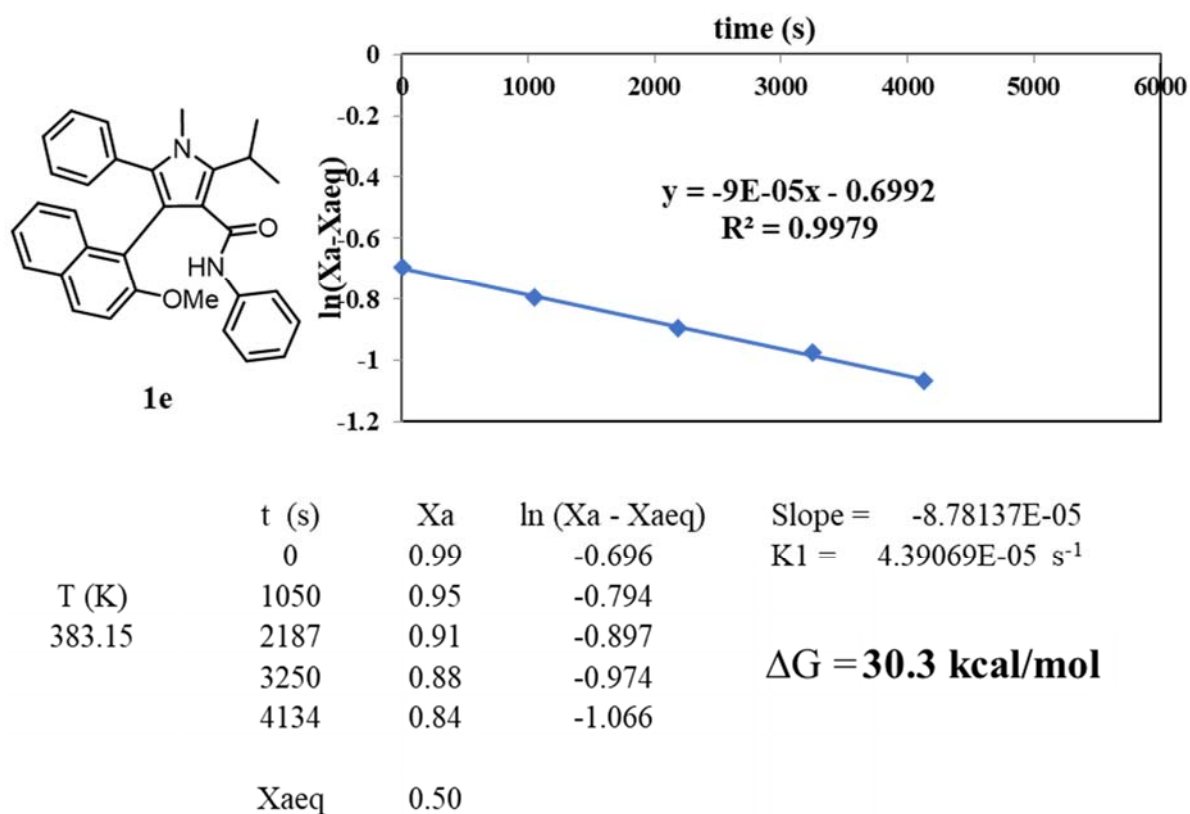

**Figure S3.** Kinetic studies of reversible first-order racemization of atorvastatin model **1e**. A sample of the first eluted atropisomer was heated at +110 °C constant temperature in 1,1,2,2-tetrachloroethane. Aliquotes of the solution was collected at different times and analyzed by CSP-HPLC at 25 °C to measure the atropisomeric excess.  $X_a$  molar fraction of first eluted atropisomer.  $X_{aeq}$  molar fraction at equilibrium.

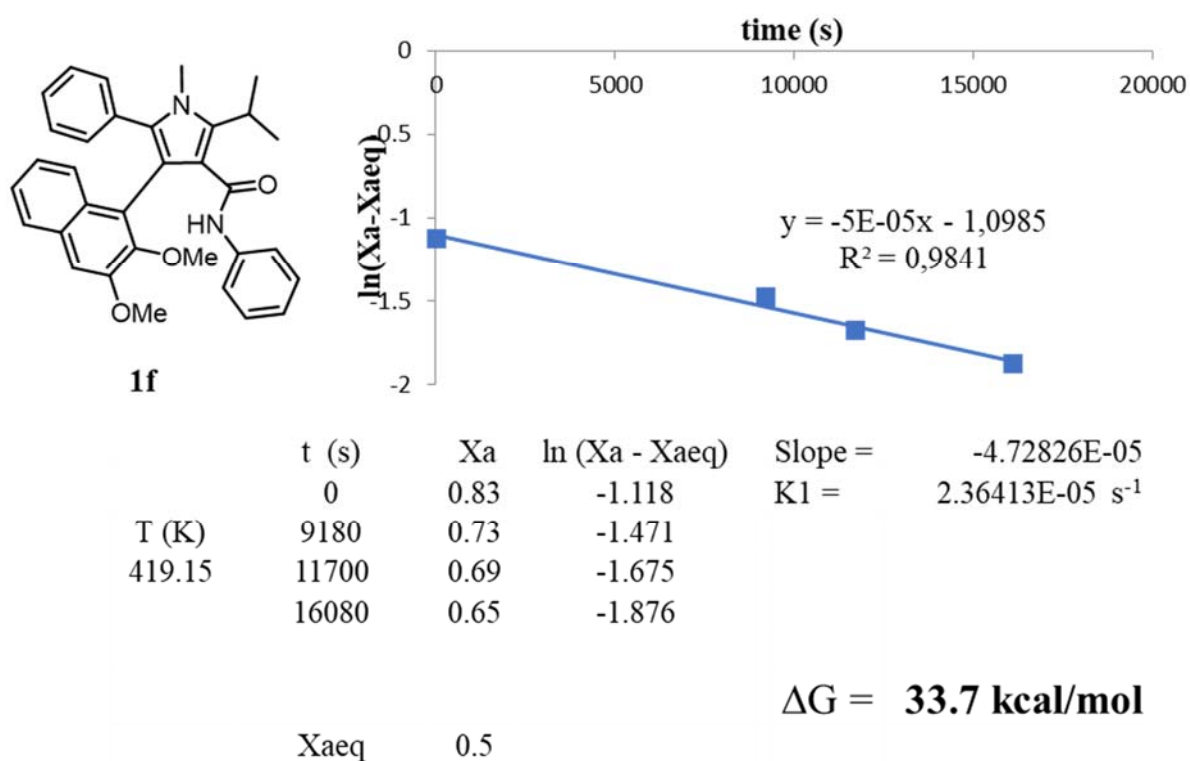

**Figure S4.** Kinetic studies of reversible first-order racemization of atorvastatin model **1f**. A sample of the first eluted atropisomer was heated at +146 °C constant temperature in 1,1,2,2-tetrachloroethane. Aliquots of the solution was collected at different times and analyzed by CSP-HPLC at 25 °C to measure the atropisomeric excess. Xa molar fraction of first eluted atropisomer. Xaeq molar fraction at equilibrium.

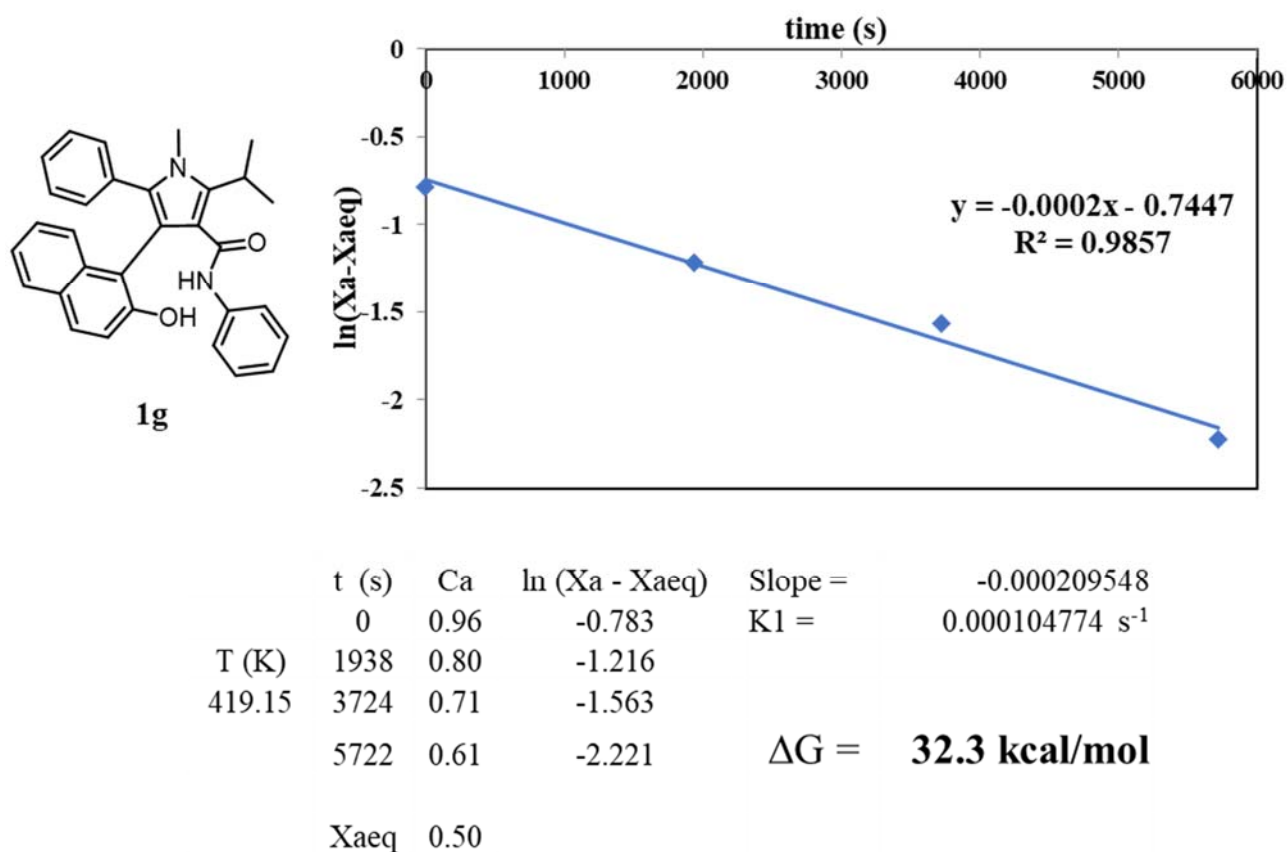

**Figure S5.** Kinetic studies of reversible first-order racemization of atorvastatin model **1g**. A sample of the first eluted atropisomer was heated at +146 °C constant temperature in 1,1,2,2-tetrachloroethane. Aliquotes of the solution was collected at different times and analyzed by CSP-HPLC at 25 °C to measure the atropisomeric excess. Xa molar fraction of first eluted atropisomer. Xaeq molar fraction at equilibrium.

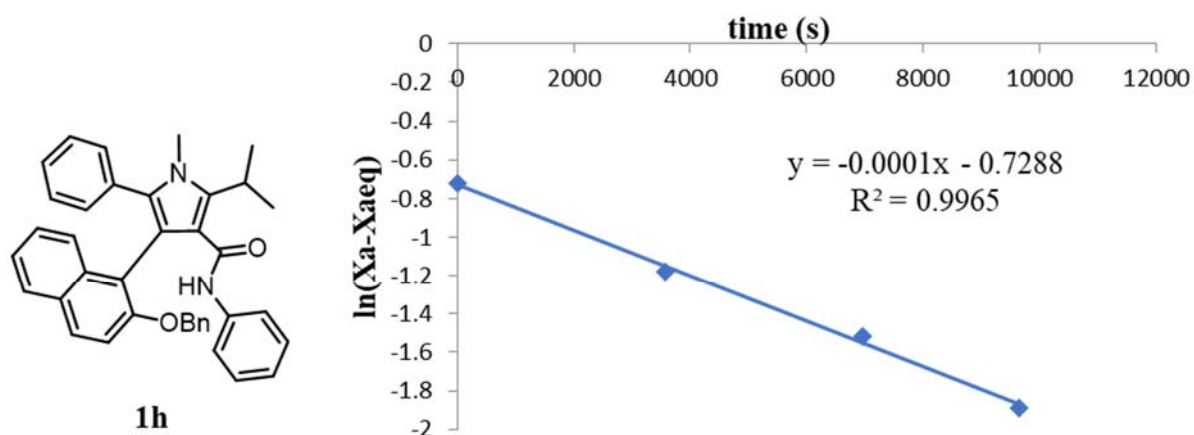

|        |           |       |                       |              |                             |
|--------|-----------|-------|-----------------------|--------------|-----------------------------|
|        | t (s)     | $X_a$ | $\ln (X_a - X_{aeq})$ | Slope =      | -0.000118164                |
|        | 0         | 0.98  | -0.722                | $k_1 =$      | 5.90818E-05 s <sup>-1</sup> |
| T (K)  | 3580      | 0.81  | -1.179                |              |                             |
| 419.15 | 6973      | 0.72  | -1.514                |              |                             |
|        | 9644      | 0.65  | -1.886                |              |                             |
|        | $X_{aeq}$ | 0.50  |                       | $\Delta G =$ | <b>32.9 kcal/mol</b>        |

**Figure S6.** Figure S5. Kinetic studies of reversible first-order racemization of atorvastatin model **1h**. A sample of the first eluted atropisomer was heated at +146 °C constant temperature in 1,1,2,2-tetrachloroethane. Aliquots of the solution was collected at different times and analyzed by CSP-HPLC at 25 °C to measure the atropisomeric excess.  $X_a$  molar fraction of first eluted atropisomer.  $X_{aeq}$  molar fraction at equilibrium.

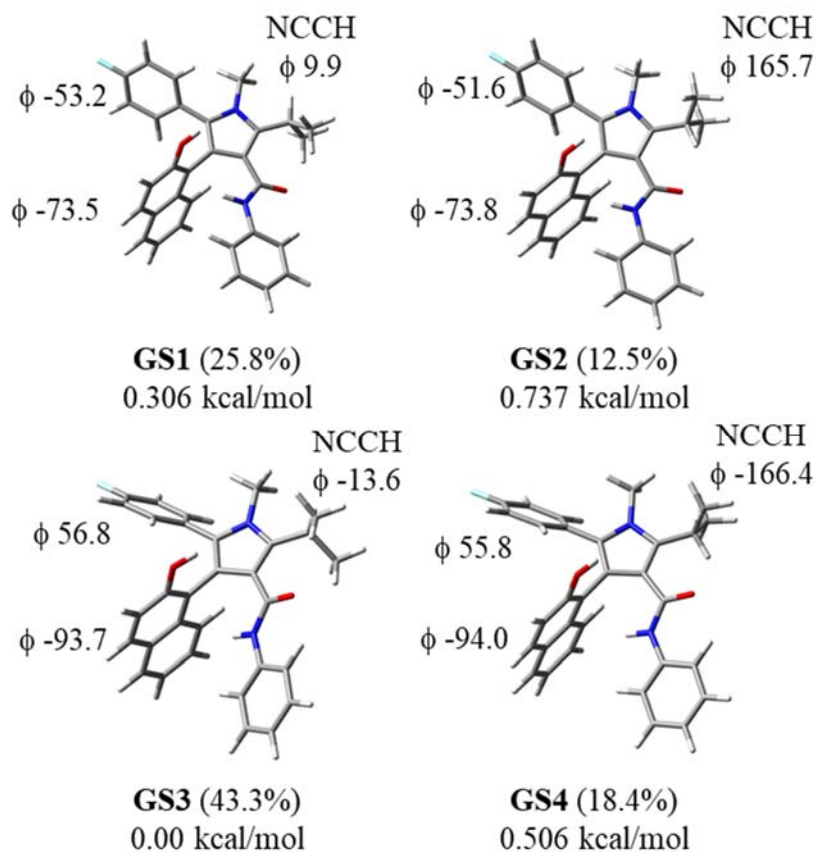

**Figure S7.** *M-7g-model* ground states geometries was calculated with DFT B3LYP/6-31G(d). In figure the dihedral angles of NCCH (iPr), fluoro-phenyl and naphthol-yl were shown.

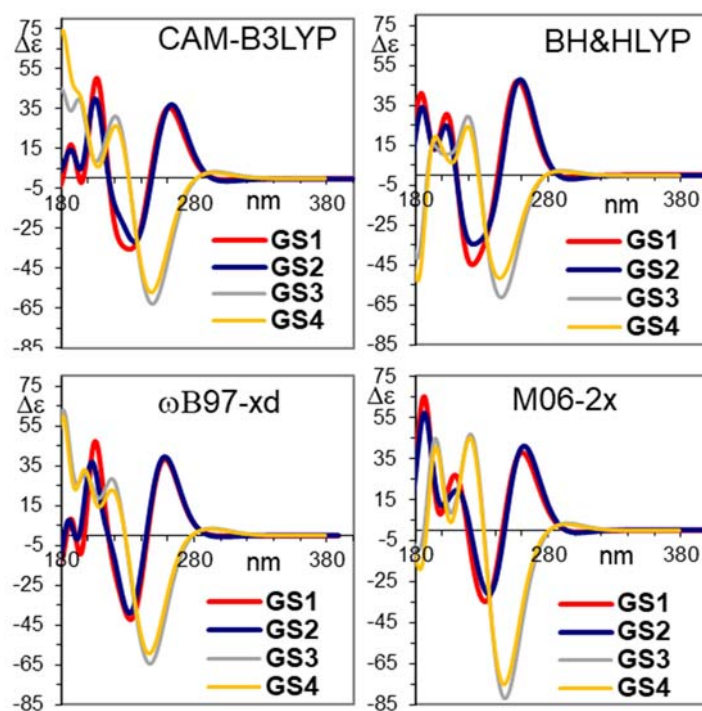

**Figure S8.** ECD studies of compound *M-7g-model*. In the Figure was reported all the simulated ECD spectra of GSs with the different functionals and same basis set 6-311++G(2d,p). The sum of spectra was reported in the main text.



## Scheme of synthesis

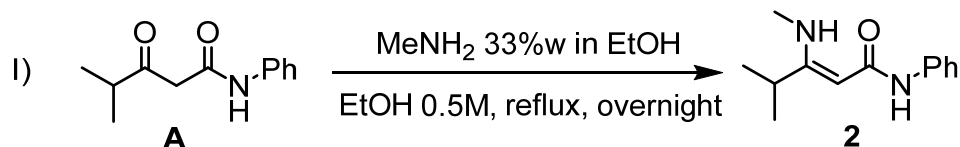

To a solution of 4-methyl-3-oxo-N-phenylpentanamid (3.72 g, 18.2 mmol) in ethanol (0.5 M, 7.49 mL) was added methylamine (33%w solution in EtOH, 17.27 mL). The resulting mixture was refluxed for 7 h and concentrated in vacuo, obtaining a yellow oil used without further purification (3.97 g, 99%).

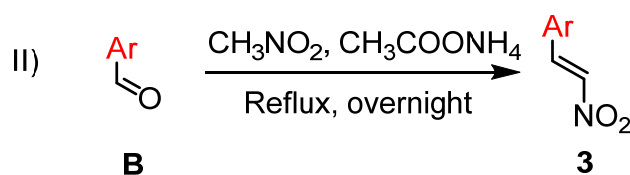

- |                                        |                                         |
|----------------------------------------|-----------------------------------------|
| a) <b>Ar</b> = o-tolyl (94%)           | e) <b>Ar</b> = 2-OMe-1-naphthyl (98%)   |
| b) <b>Ar</b> = 1-naphthyl (98%)        | f) <b>Ar</b> = 2,3-OMe-1-naphthyl (98%) |
| c) <b>Ar</b> = 2-Me-1-naphthyl (91%)   | g) <b>Ar</b> = 2-OH-1-naphthyl (74%)    |
| d) <b>Ar</b> = 2,3-Me-1-naphthyl (98%) | h) <b>Ar</b> = 2-OBn-1-naphthyl (99%)   |

A stirred mixture of the corresponding aldehyde (3 mmol, 1 eq), ammonium acetate (0.9 mmol, 0.3 eq) and nitromethane (9 mL, 55 eq) was refluxed for 2-12 h, monitored by TLC. Afterward, the mixture was treated with a saturated aqueous solution of  $\text{NaHCO}_3$  and three-fold extracted with  $\text{CH}_2\text{Cl}_2$ . The combined organic phases were dried over anhydrous  $\text{Na}_2\text{SO}_4$  and the nitromethane was distilled under reduced pressure. No further purification is needed.

**Scheme S1.** Synthesis of substrates for modified atorvastatin model.

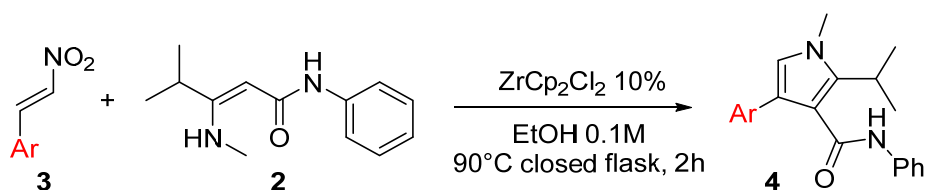

To the enamine solution **2** (0.11 g, 0.5 mmol, 1eq) in ethanol (5 mL, 0.1 M), nitrovinyl-aryl **3** (0.5 mmol 1 eq) and  $\text{ZrCp}_2\text{Cl}_2$  (14.6 mg, 0.1 eq) were added. The solution was heated to 90 °C in a closed flask for 4h, then it was concentrated in vacuo. The crude solid was treated over a chromatography column with a mixture of Hex/DCM/EtOAc eluent, to afford the product **4** as a pale-yellow solid (Yield 30-70%).

**Scheme S2.** Synthesis of pyrroles **4**.

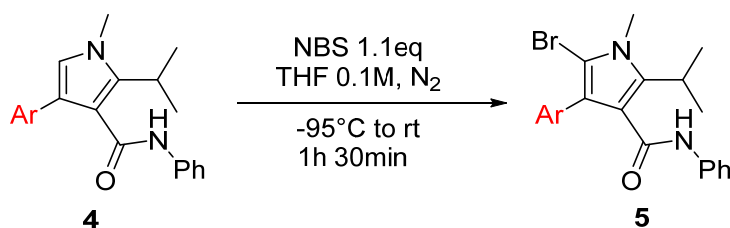

In a round bottom flask equipped with a magnetic stirring bar and under N<sub>2</sub> atmosphere, the pyrrole **4** (0.20 mmol, 1 eq) was dissolved in anhydrous THF (2 mL, 0.1 M) and cooled to -95 °C. Then N-bromosuccinimide (39.2 mg, 0.22 mmol, 1.1 eq) was added and the solution stirred avoiding light for 30 min. Then, the mixture was allowed to warm to room temperature for 1 h, still stirring and avoiding light. Hence, the solution was diluted with EtOAc, consequently passed in a silica plug and washed with a saturated solution of NaHCO<sub>3</sub> (3x10 mL). The organic layer was dried over Na<sub>2</sub>SO<sub>4</sub> and concentrated in vacuo, affording the product **5** as a pale-yellow solid. No further purification was needed (Yield 99%).

**Scheme S3.** Synthesis of pyrroles **5**.

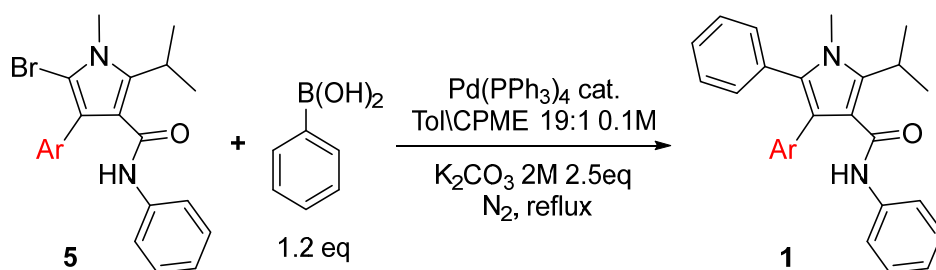

In a two-neck round bottom flask equipped with a magnetic stirring bar, reflux condenser and under N<sub>2</sub> atmosphere a solution of compound **5** (0.052 mmol, 1 eq) in toluene/CPME (19:1, 0.17 mL), the phenylboronic acid (9.51 mg, 0.078 mmol, 1.5 eq) and a solution of K<sub>2</sub>CO<sub>3</sub> (2 M, 62.4 μL, 2.5 eq) were added. The resulting mixture was degassed with cycles of vacuum/nitrogen. Then, a catalytic amount of Pd(PPh<sub>3</sub>)<sub>4</sub> was added over nitrogen flow and the resulting mixture refluxed for 4 h avoiding light. The solution was passed through a Celite plug, then concentrated in vacuo. The resulting crude was dissolved in DCM, washed with water and extracted with DCM. The combined organic layer was dried over Na<sub>2</sub>SO<sub>4</sub>, concentrated in vacuo, and the product was purified by column chromatography with a mixture of hexane\DCM\EtOAc obtaining **1** as a white solid (Yields 70%-97%).

**Scheme S4.** Synthesis of atorvastatin models **1**.

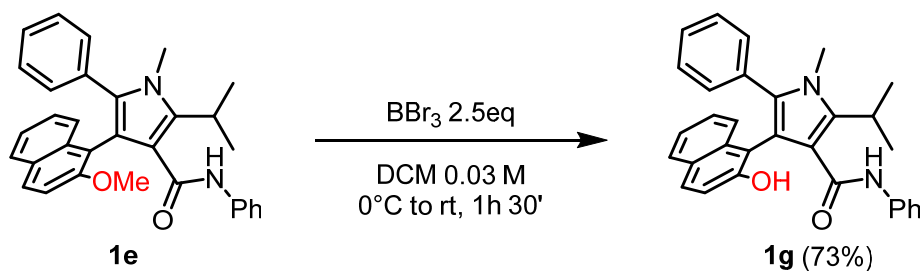

In a two-neck round bottom flask equipped with a magnetic stirring bar and under N<sub>2</sub>, the compound **1e** (59 mg, 0.12 mmol, 1eq) was dissolved in dichloromethane (4.1 mL, 0.03M) and cooled to 0°C. Then, a 1 M solution of BBr<sub>3</sub> in dichloromethane (310 µL, 0.31 mmol, 2.5 eq) was added dropwise. The resulting mixture was then allowed to warm to room temperature and was stirred for 1h and 30 minutes. Successively, 4 mL of cool water was added at 0 °C and then stirred for another 20 minutes. The solution was then extracted with DCM (2 x 10 mL) and the combined organic layer was dried over Na<sub>2</sub>SO<sub>4</sub> and con-centrated in vacuo. The product was purified by column chromatography with a mixture 60:20:20 of hexane\DCM\EtOAc eluent obtaining **1g** (40.3 mg, 73 % yield) as a white solid.

**Scheme S5.** Synthesis of atorvastatin model **1g**.

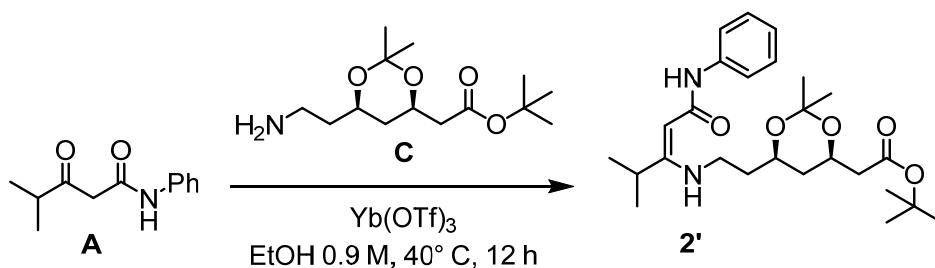

In a round bottom flask equipped with a magnetic stirring bar and a reflux condenser, 4-methyl-3-oxo-N-phenylpentanamide (0.72 g, 3.49 mmol), tert-butyl 2-((4R,6R)-6-(2-aminoethyl)-2,2-dimethyl-1,3-dioxan-4-yl)acetate (0.95 g, 3.49 mmol) and Yb(OTf)<sub>3</sub> (22 mg, 0.04 mmol, 0.01 eq) were dissolved in EtOH (4 mL, 0.9 M). The reaction was conducted at 40 °C for 12h, then the mixture was passed through basic alumina eluted with EtOH. Concentrated in vacuo, the resultant pale-yellow oil could be used without further purification. If crystallized in hot ACN, product **2'** could be afforded as a white powder (1.1 g, Yield=65%).

**Scheme S6.** Synthesis of enamine **2'**.

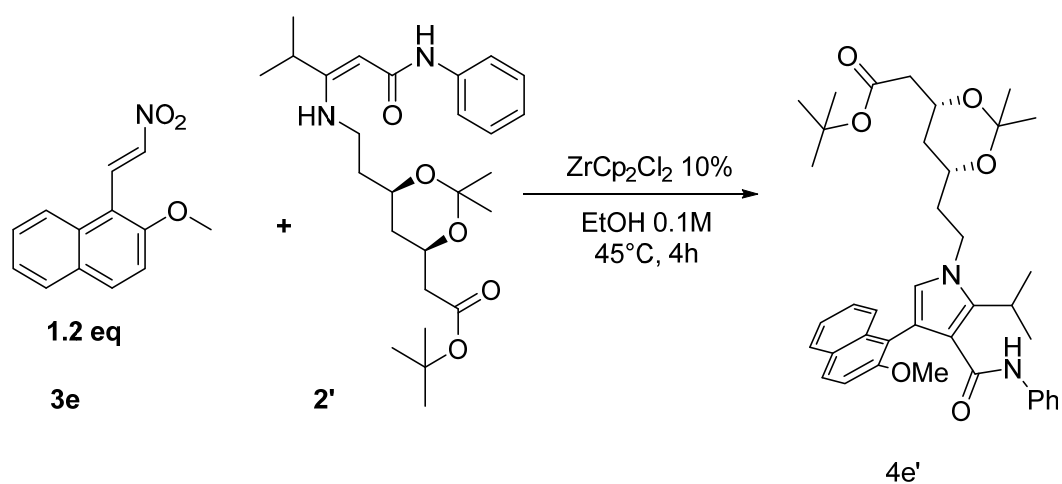

In a test tube equipped with a magnetic stirring bar, the enamine solution **2'** (0.23 g, 0.5 mmol, 1eq) in ethanol (5 mL 0.1 M), (E)-2-methoxy-1-(2-nitrovinyl)naphthalene **3e** (0.14 g, 0.6 mmol 1.2 eq) and  $\text{ZrCp}_2\text{Cl}_2$  (14.6 mg, 0.1 eq) were added. The vessel was sealed and the solution was heated to 40 °C for 4h, then it was concentrated in vacuo. The crude solid was treated over the chromatography column with a gradient mixture of Toluene/EtOAc 10:1 to 8:1, to afford 0.2 g of product **4e'** (yield = 63 %) as pale-yellow solid.

**Scheme S7.** Synthesis of pyrrole **4e'**.

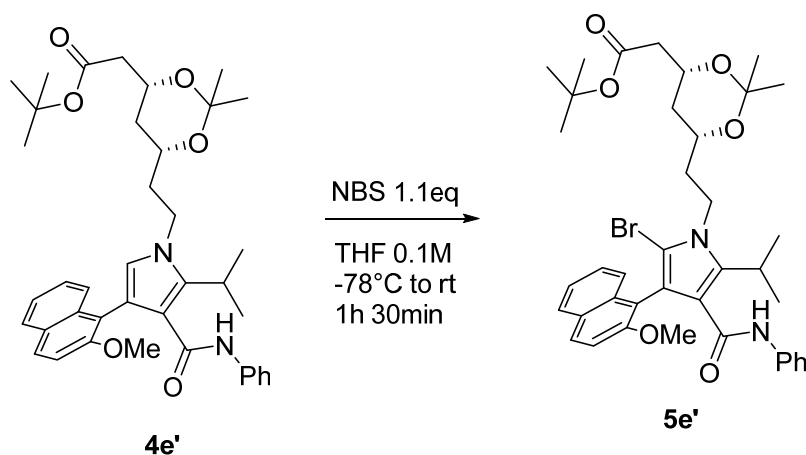

In a round bottom flask equipped with a magnetic stirring bar and under N<sub>2</sub> atmosphere, the pyrrole **4e'** (0.33 g, 0.52 mmol, 1 eq) was dissolved in anhydrous THF (5 mL, 0.1 M) and cooled to -95 °C. Then N-bromosuccinimide (0.11 mg, 0.57 mmol, 1.1 eq) was added and the solution stirred avoiding light for 2 hours, allowing the solution to heat up to -10 °C. Then, the solution was diluted with EtOAc, consequently passed in a silica plug and washed with a saturated solution of NaHCO<sub>3</sub> (3x10 mL). The organic layer was dried over Na<sub>2</sub>SO<sub>4</sub> and concentrated in vacuo, affording the product **5e'** as pale-yellow solid (0.37 g, yield = 99 %). The two diastereoisomers were characterized after CSP-HPLC separation (AD-H, 80:20 Hex/IPA, 20 mL/min, first eluted = 3.7 min, second eluted = 4.9 min).

**Scheme S8.** Synthesis of pyrroles **5e'**.

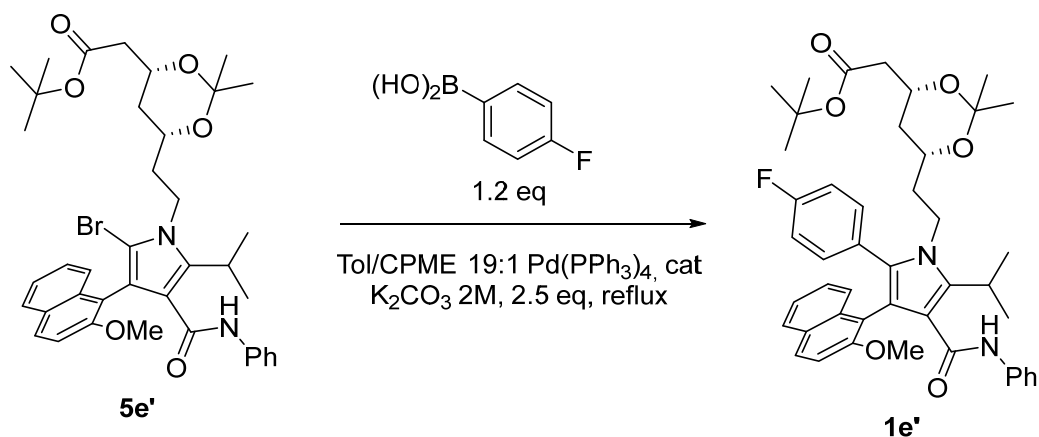

In a round bottom flask equipped with a magnetic stirring bar and under  $\text{N}_2$  atmosphere, the pyrrole **5e'** (0.58 g, 0.8 mmol, 1eq) and (4-fluorophenyl)boronic acid (168.8 mg, 1.2 mmol, 1.5 eq) were dissolved in a 19/1 v/v mixture of toluene and CPME (8 mL, 0.1 M). Therefore, a 2 M solution of  $\text{K}_2\text{CO}_3$  (1 mL, 2.5 eq) was added. The solution was degassed with cycles of vacuum/ $\text{N}_2$  in an ultrasonic bath, then a catalytic amount of  $\text{Pd}(\text{PPh}_3)_4$  was added. The resulting mixture was refluxed overnight avoiding light. The solution was passed through a Celite plug to separate the catalyst, then a quick silica chromatography column was performed (eluent 65:15:20 mixture of Hex/DCM/EtOAc). The resulting mixture of **1e'** and **4e'** (483 mg, ratio 76:24 of **1e'**/**4e'** by  $^1\text{H-NMR}$ ) was finally separated into semi-preparative CSP-HPLC. In this way, it was also possible to separate the diastereoisomers of **1e'** (AD-H, 20 mL/min, 90:10 Hex/IPA). First diastereoisomer eluted at 3.6 min, collected 131.8 mg, yield = 22%; Second diastereoisomer eluted at 5.7 min, collected 130.4 mg, yield = 22%; pyrrole **4e'** eluted at 6.8 min.

**Scheme S9.** Synthesis of pyrrole **1e'**.

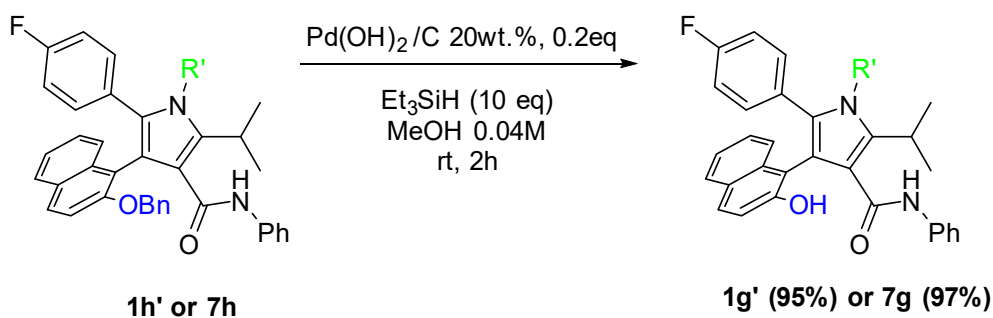

In a test tube equipped with a magnetic stir bar and with an Argon flow, the corresponding pyrrole (0.123 mmol, 1 eq), Pd(OH)<sub>2</sub> on carbon (20 wt.%, 0.2 eq, 0.0246 mmol, 17 mg) were dissolved on MeOH (3 mL, 0.04 M). Et<sub>3</sub>SiH (1.23 mmol, 200  $\mu$ L, 10 eq) was dropped and the reaction was stirred for 2 h a room temperature. The solution was filtrated through a Celite plug with EtOAc, then concentrated in vacuo. The product was afforded as white solid without further purification.

**Scheme S10.** Synthesis of atorvastatin models-**1g'** or **7g**.

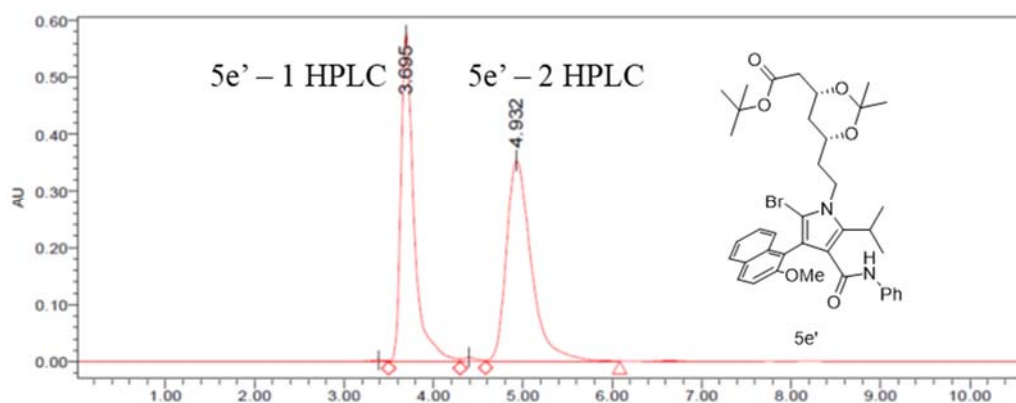

**Figure S9.** CSP-HPLC chromatogram of **5e'**. Separation in AD-H column, 80:20 Hex/IPA, 20 mL/min, first eluted = 3.7 min, second eluted = 4.9 min).

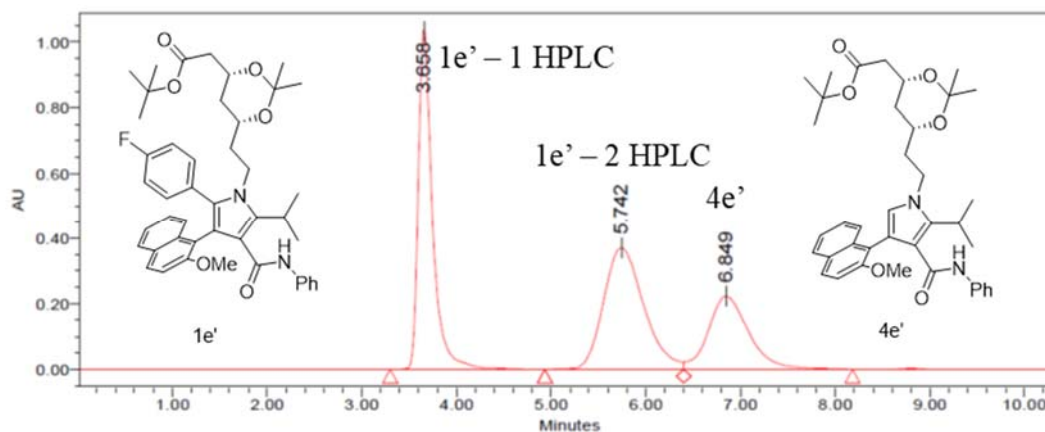

**Figure S10.** CSP-HPLC chromatogram of **1e'** and **4e'**. Separation in AD-H column, 90:10 Hex/IPA, 20 mL/min, first eluted = 3.6 min, second eluted = 5.7 min, **4e'** eluted = 6.8 min).

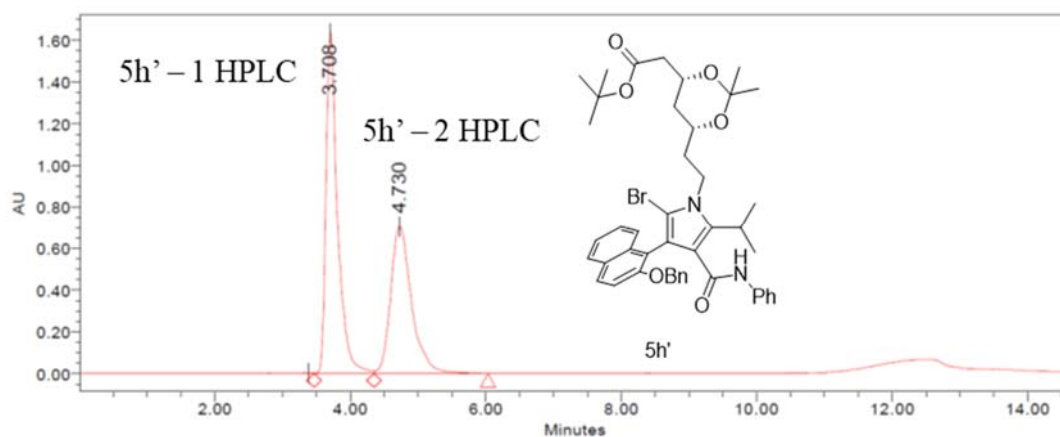

**Figure S11.** CSP-HPLC chromatogram of **5h'**. Separation in AD-H column, 80:20 Hex/IPA, 20 mL/min, first eluted = 3.7 min, second eluted = 4.7 min).

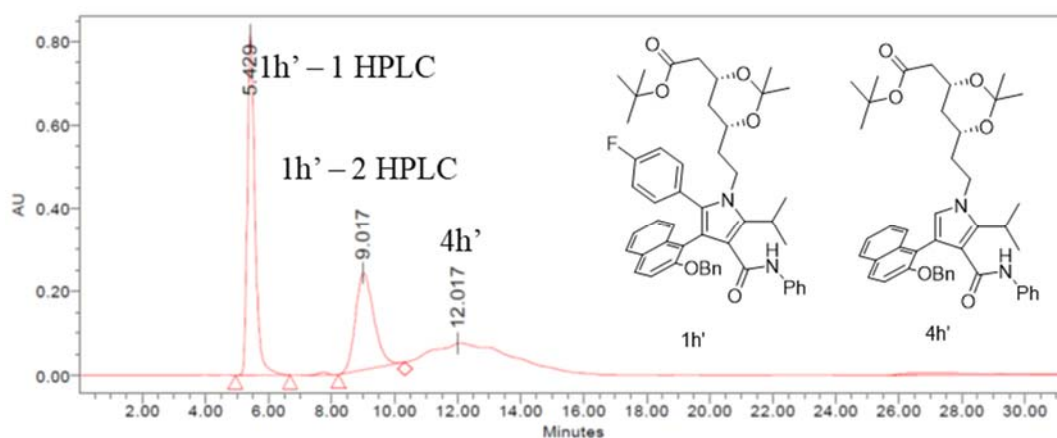

**Figure S12.** CSP-HPLC chromatogram of **1h'** and **4h'**. Separation in AD-H column, 90:10 Hex/IPA, 20 mL/min, first eluted = 5.4 min, second eluted = 9.0 min, 4e' eluted = 12.0 min).



## Molecular Docking<sup>19</sup>

Geometry optimization of the proposed ligands and virtual docking of the proposed atropostatin II were performed to calculate their predicted binding energy to the binding site of 1HWK.

Preparation of molecules: Before starting the docking calculations, ligand geometry optimization was done by DFT calculations of the minimum-energy conformation using Gaussian16.[20]

Preparation of target macromolecule. The target 1HWK (pdb), were retrieved from the Protein Data Bank (<http://www.rcsb.org/pdb/>).

The proteins were prepared at pH =7 with Maestro 9.1 software (Schrödinger, LLC, New York, NY, 2010) deleting waters, optimizing HBond assignments and deleting original ligands.

Procedure for molecular docking Docking calculations were carried out using AutoDock 4.2 and Autogrid 4.0 on a dual-xeon T7400 Dell workstation.

Grids (one grid for each atom type in the ligand, plus an electrostatic and a desolvation map) were centred on the binding site and were chosen to be large enough (70 x 70 x 70 Å<sup>3</sup>) to allow the ligand to move freely, even in its most fully-extended conformation. Only to the chirality axis was not allowed to invert.

Docking was performed using the AutoDock empirical free energy function and the Lamarckian genetic algorithm with local search. Lamarckian genetic algorithms can handle ligands with more degrees of freedom than the simulated annealing method. One hundred fifty docking runs with 2.500.000 energy evaluations for each run were performed for each molecule and all the evaluated targets. Cluster analysis (RMS tolerance equal to 0.5 Å) was then carried out on the docked results.

Inhibitors were compared according to the cluster with lowest docked energy found. The inhibition constants - K<sub>i</sub> - were calculated from the docked energy.

# NMR spectra

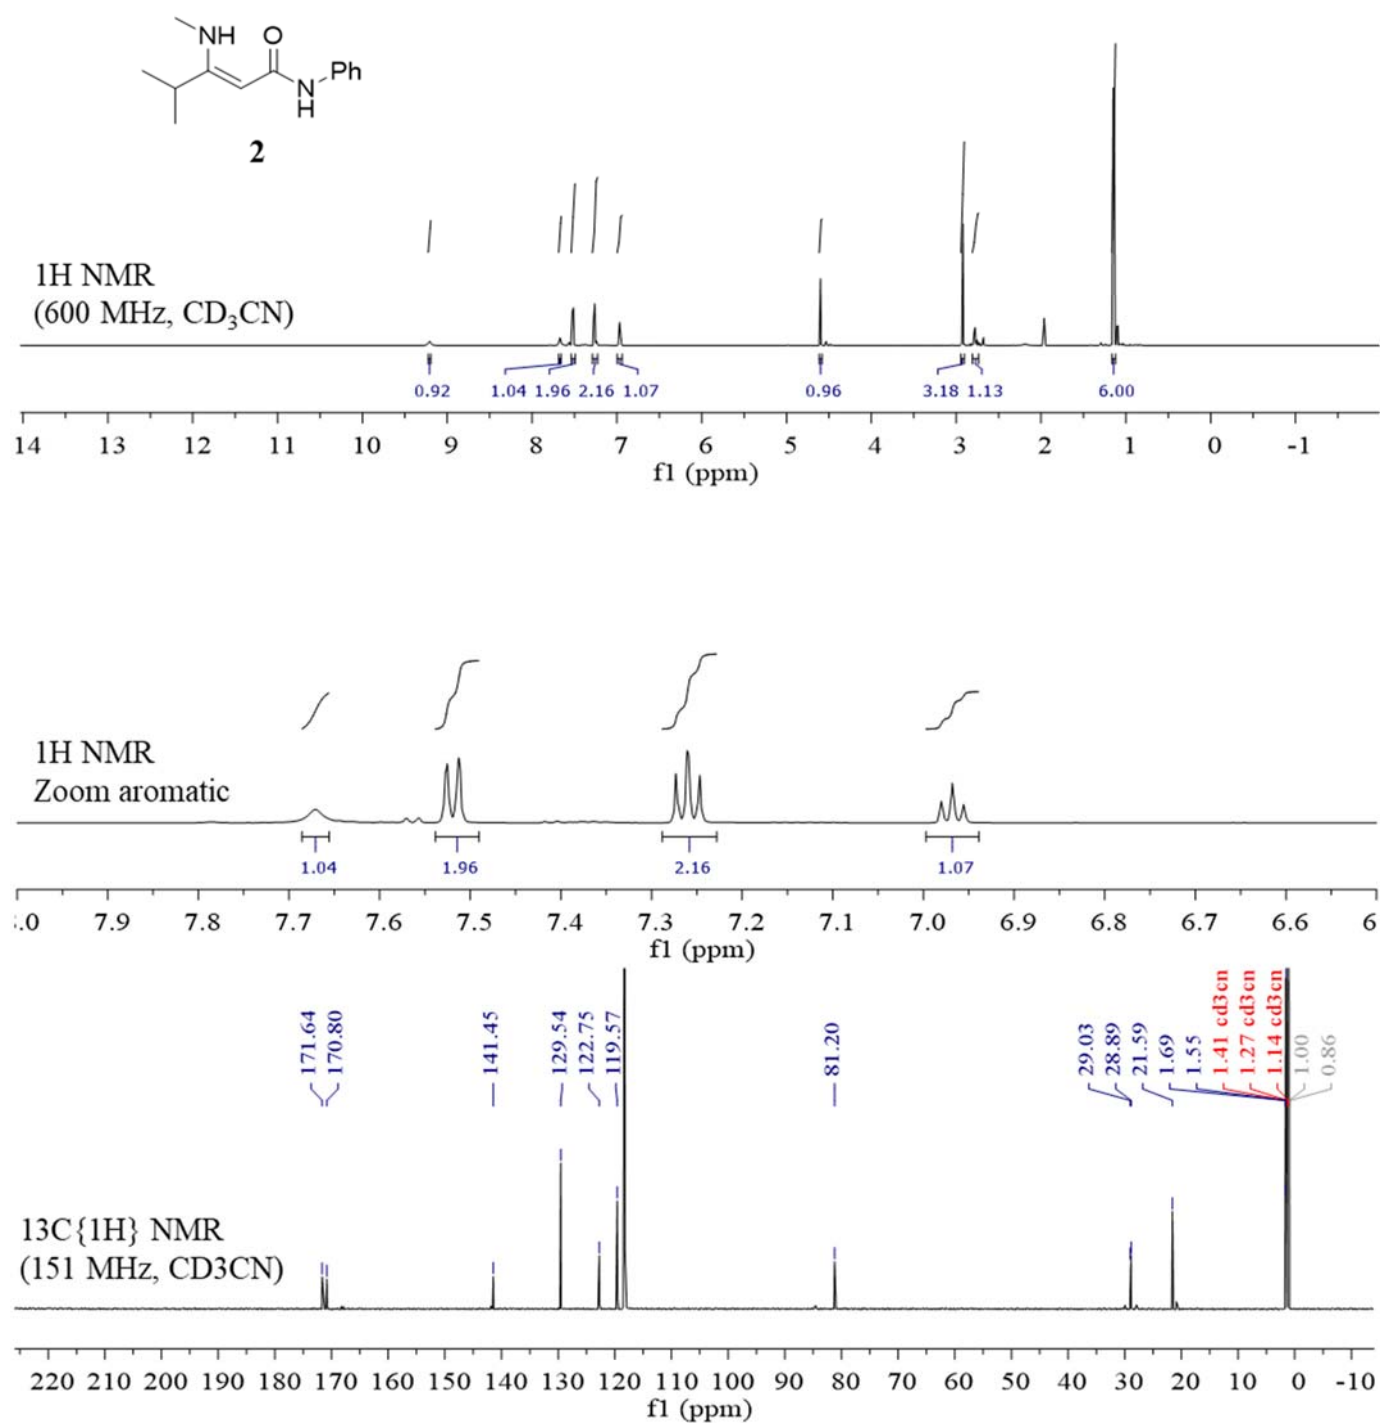

**Figure S13.** NMR spectra of **2** in CD<sub>3</sub>CN.

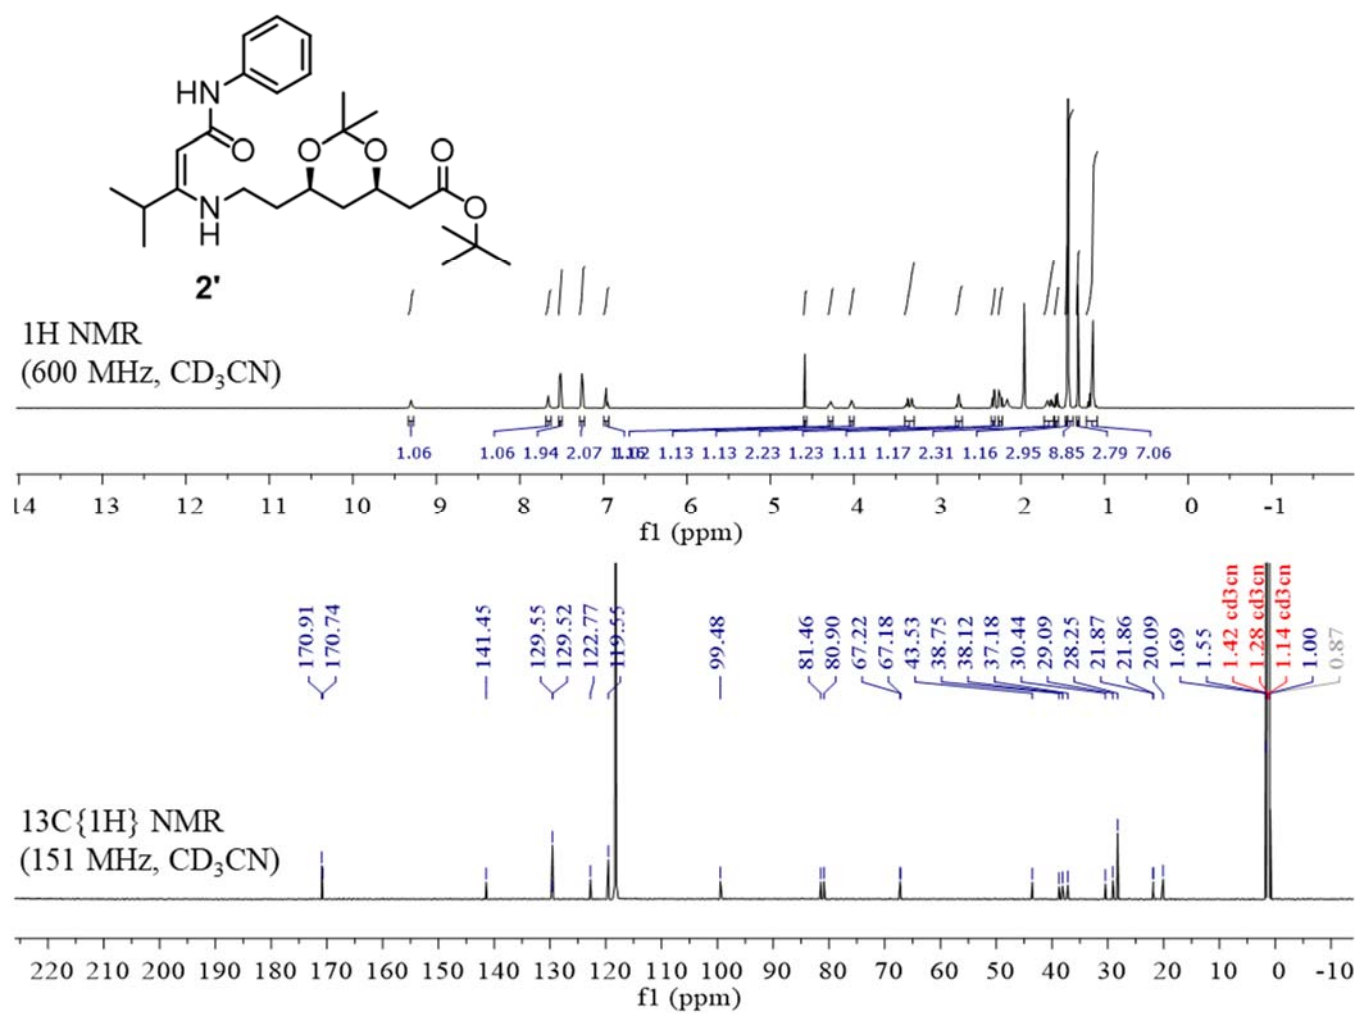

**Figure S14.** NMR spectra of **2'** in CD<sub>3</sub>CN.

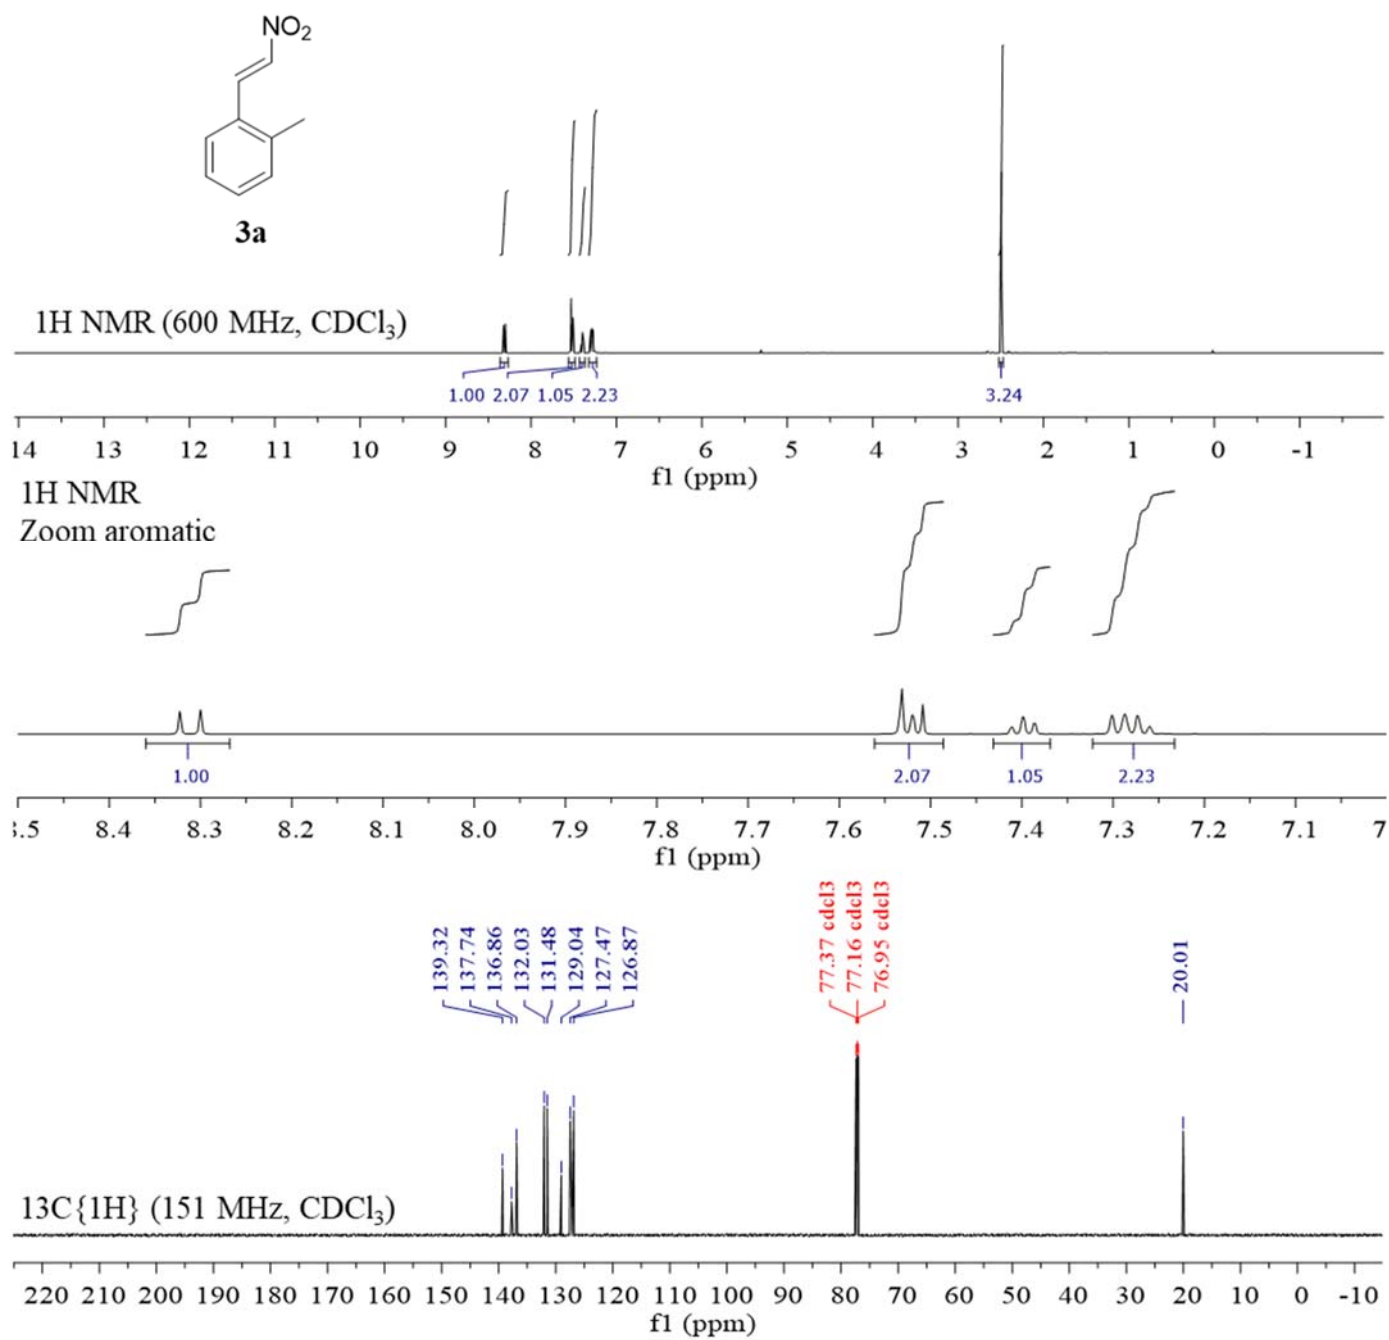

**Figure S15.** NMR spectra of **3a** in CDCl<sub>3</sub>.

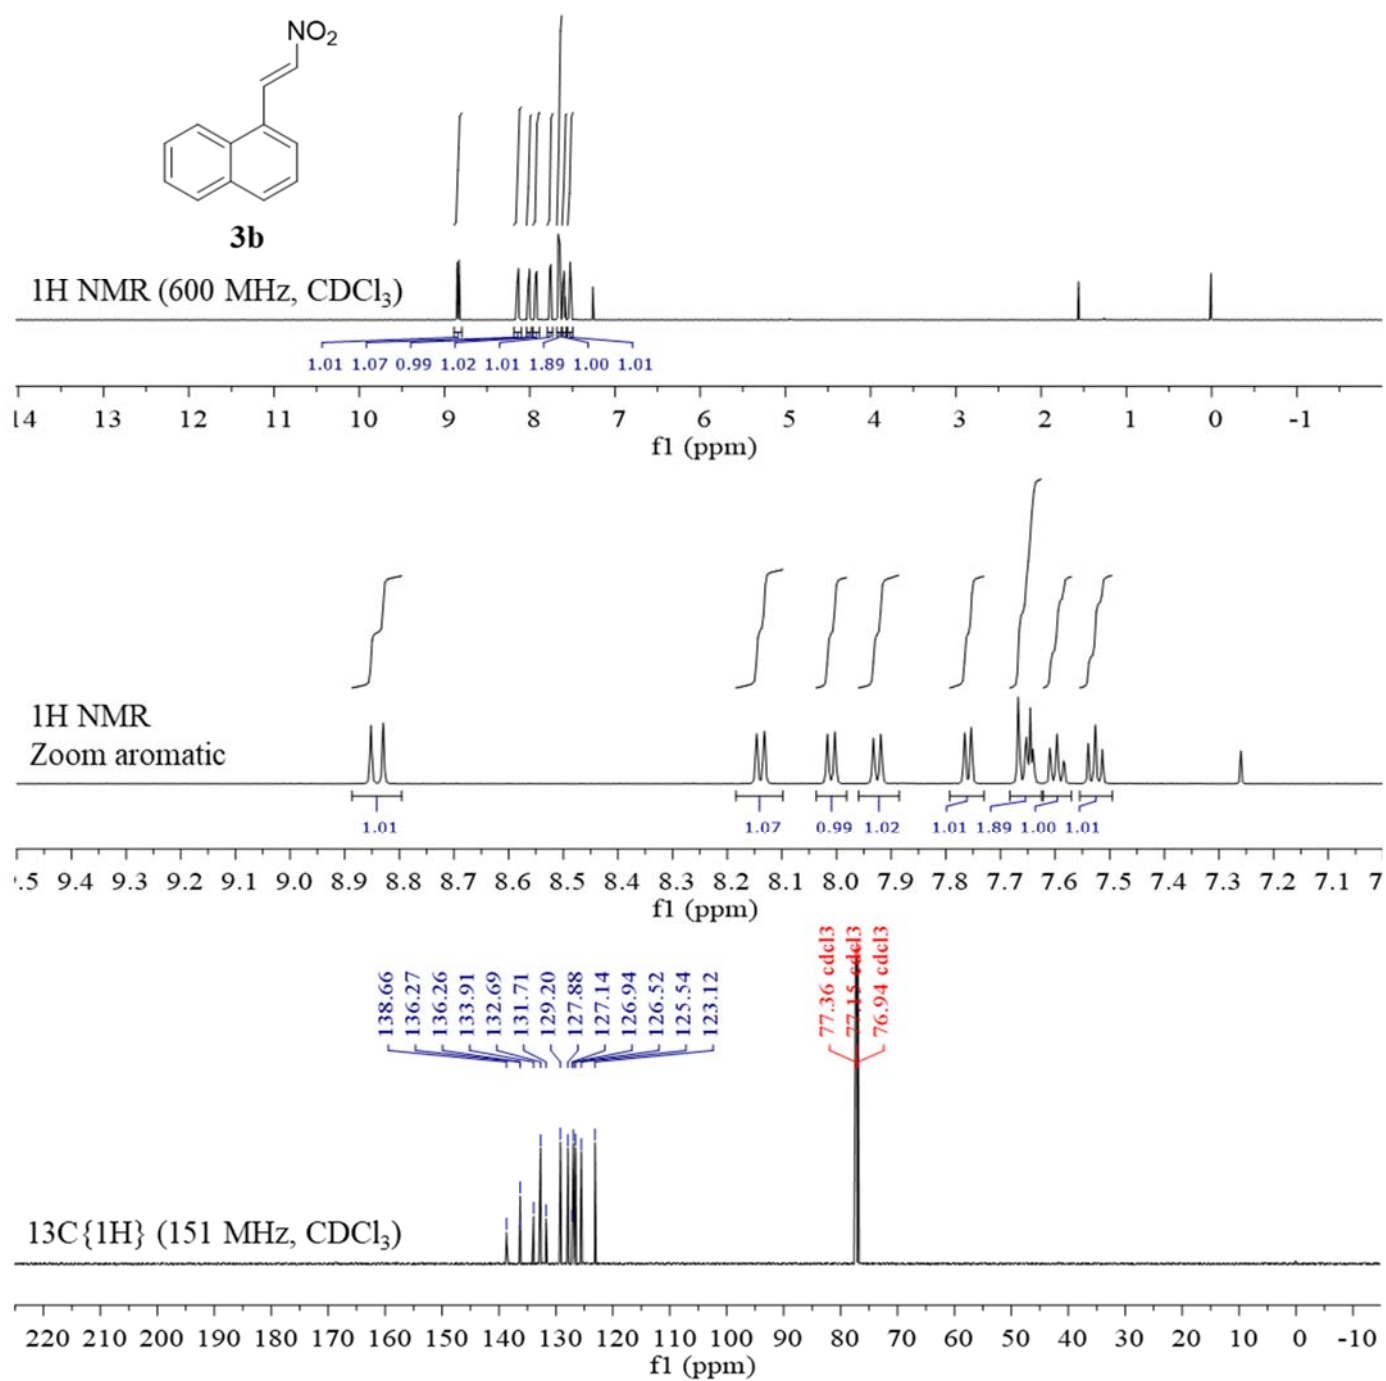

**Figure S16.** NMR spectra of **3b** in CDCl<sub>3</sub>.

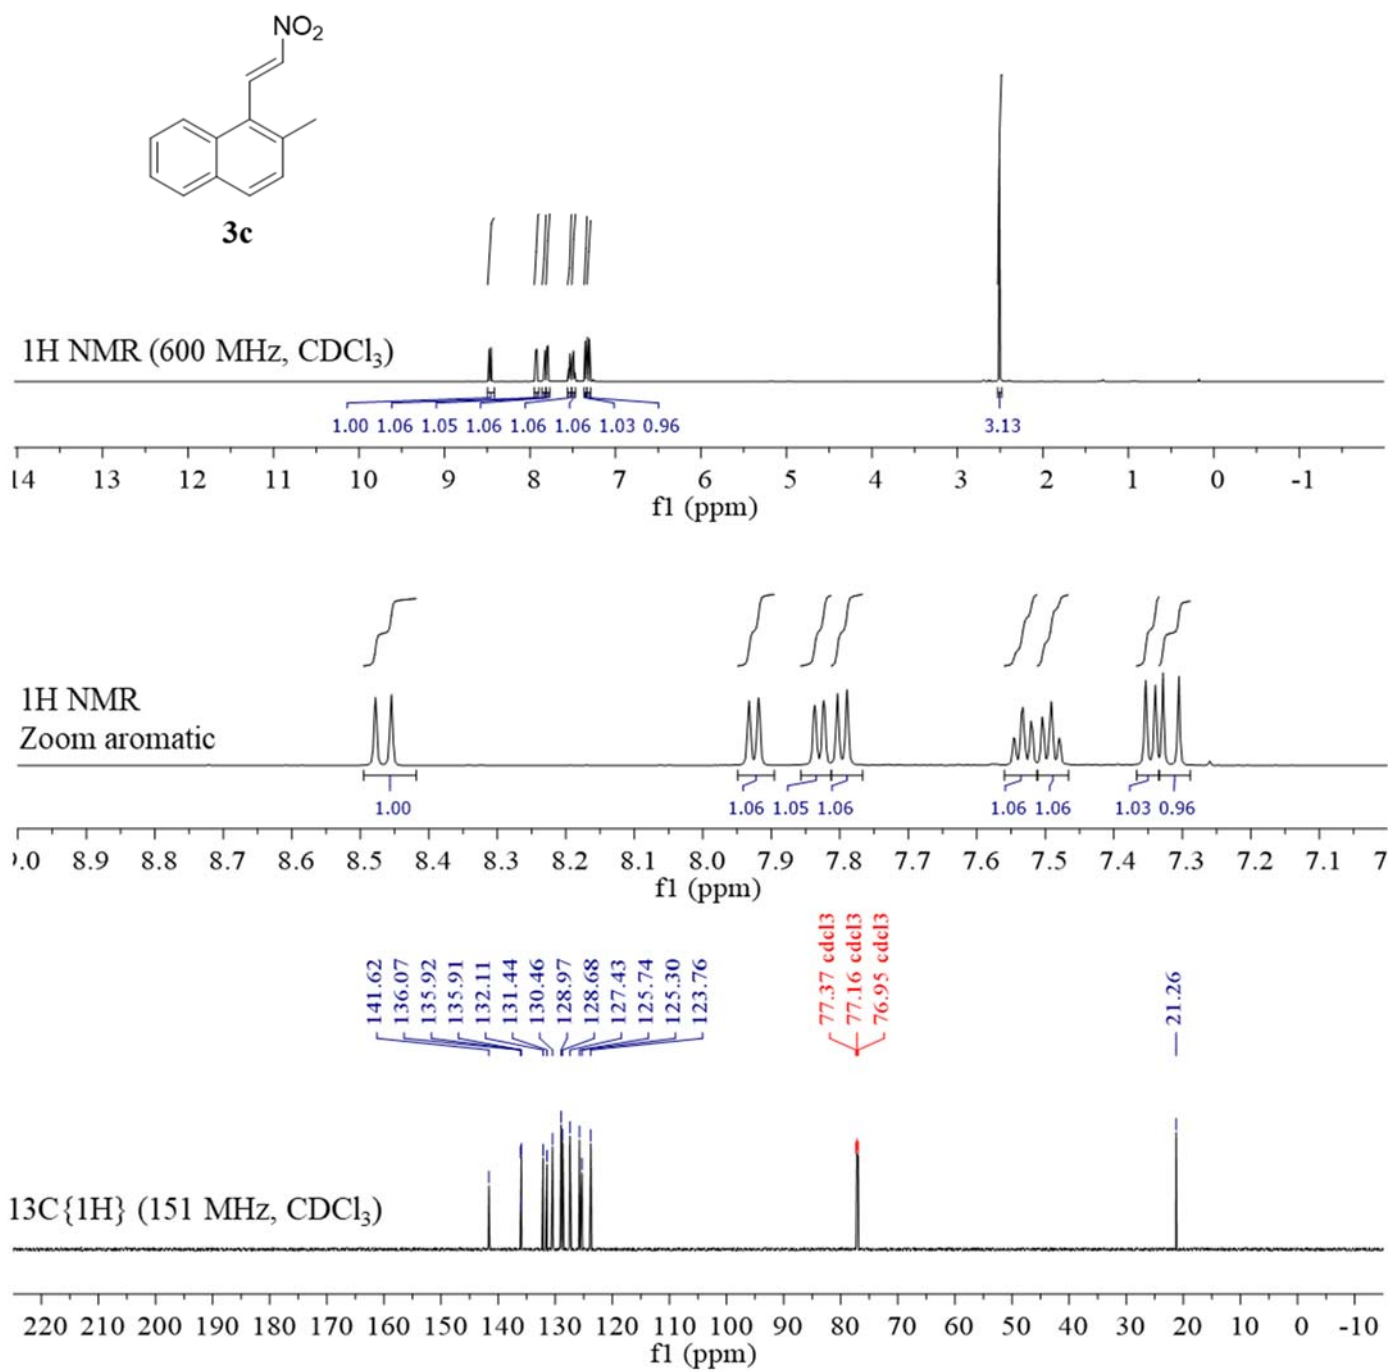

**Figure S17.** NMR spectra of **3c** in CDCl<sub>3</sub>.

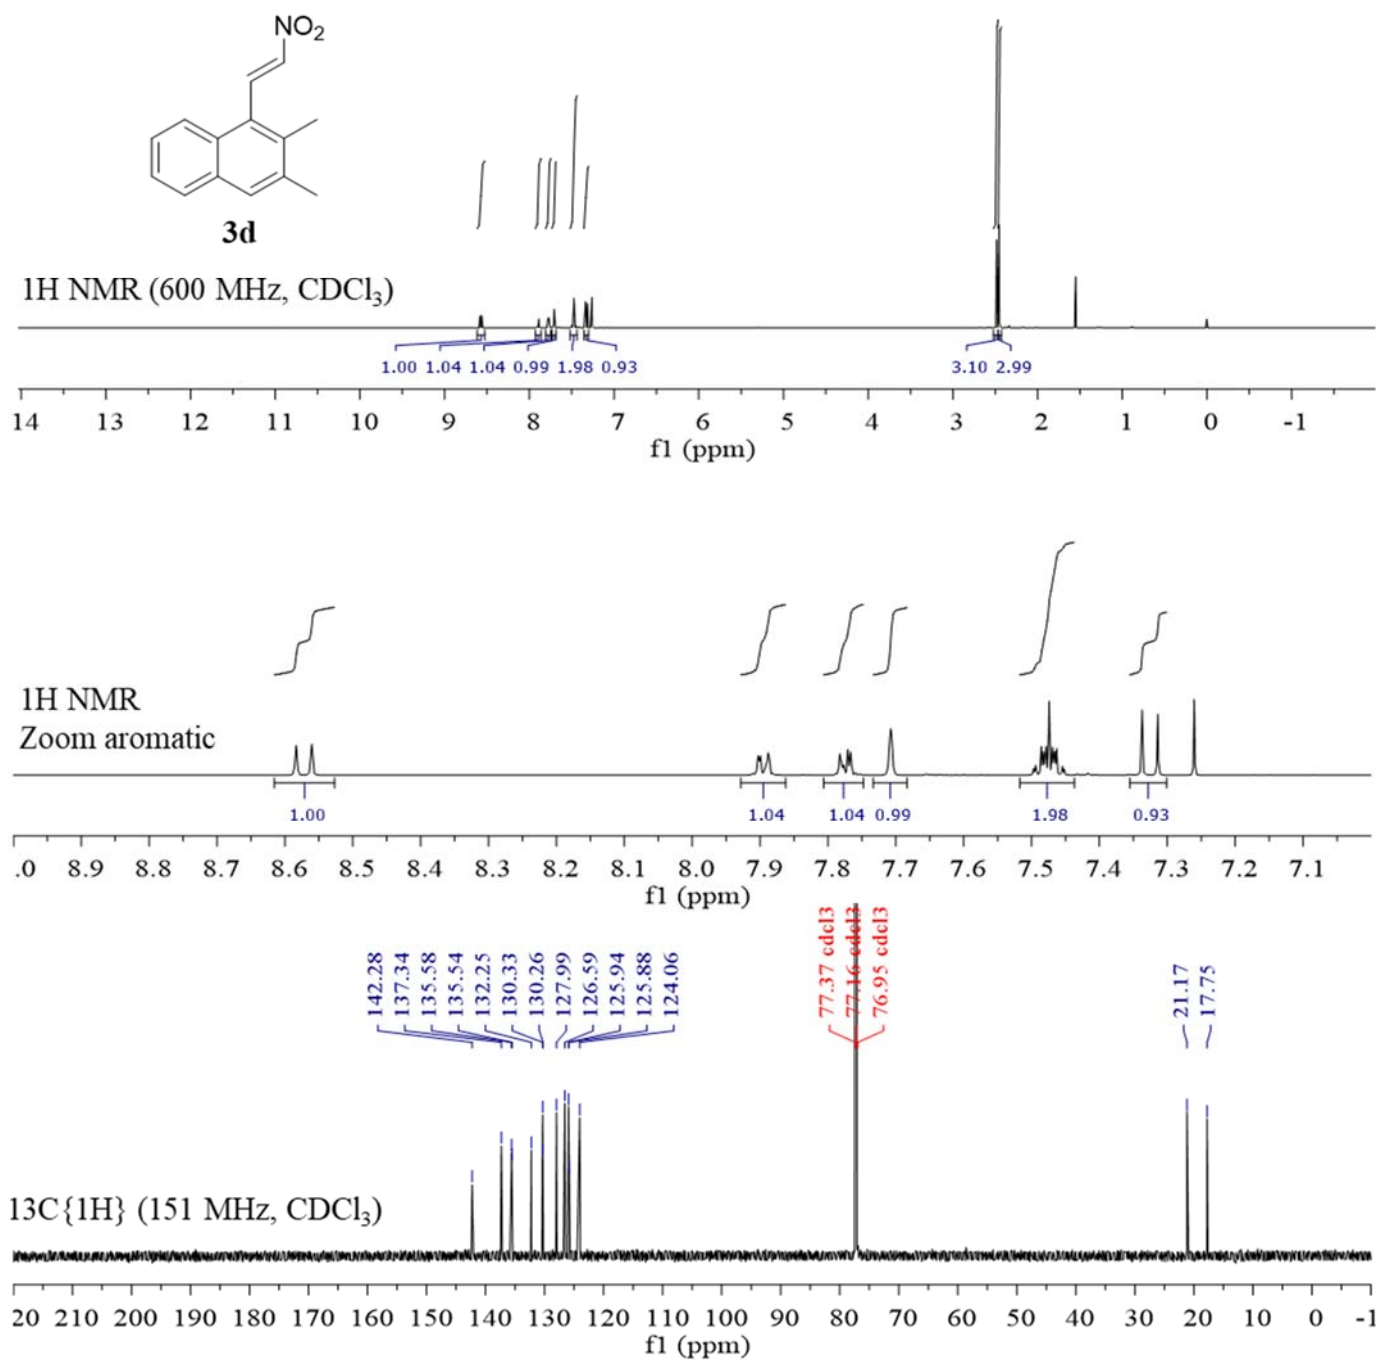

**Figure S18.** NMR spectra of **3d** in CDCl<sub>3</sub>.

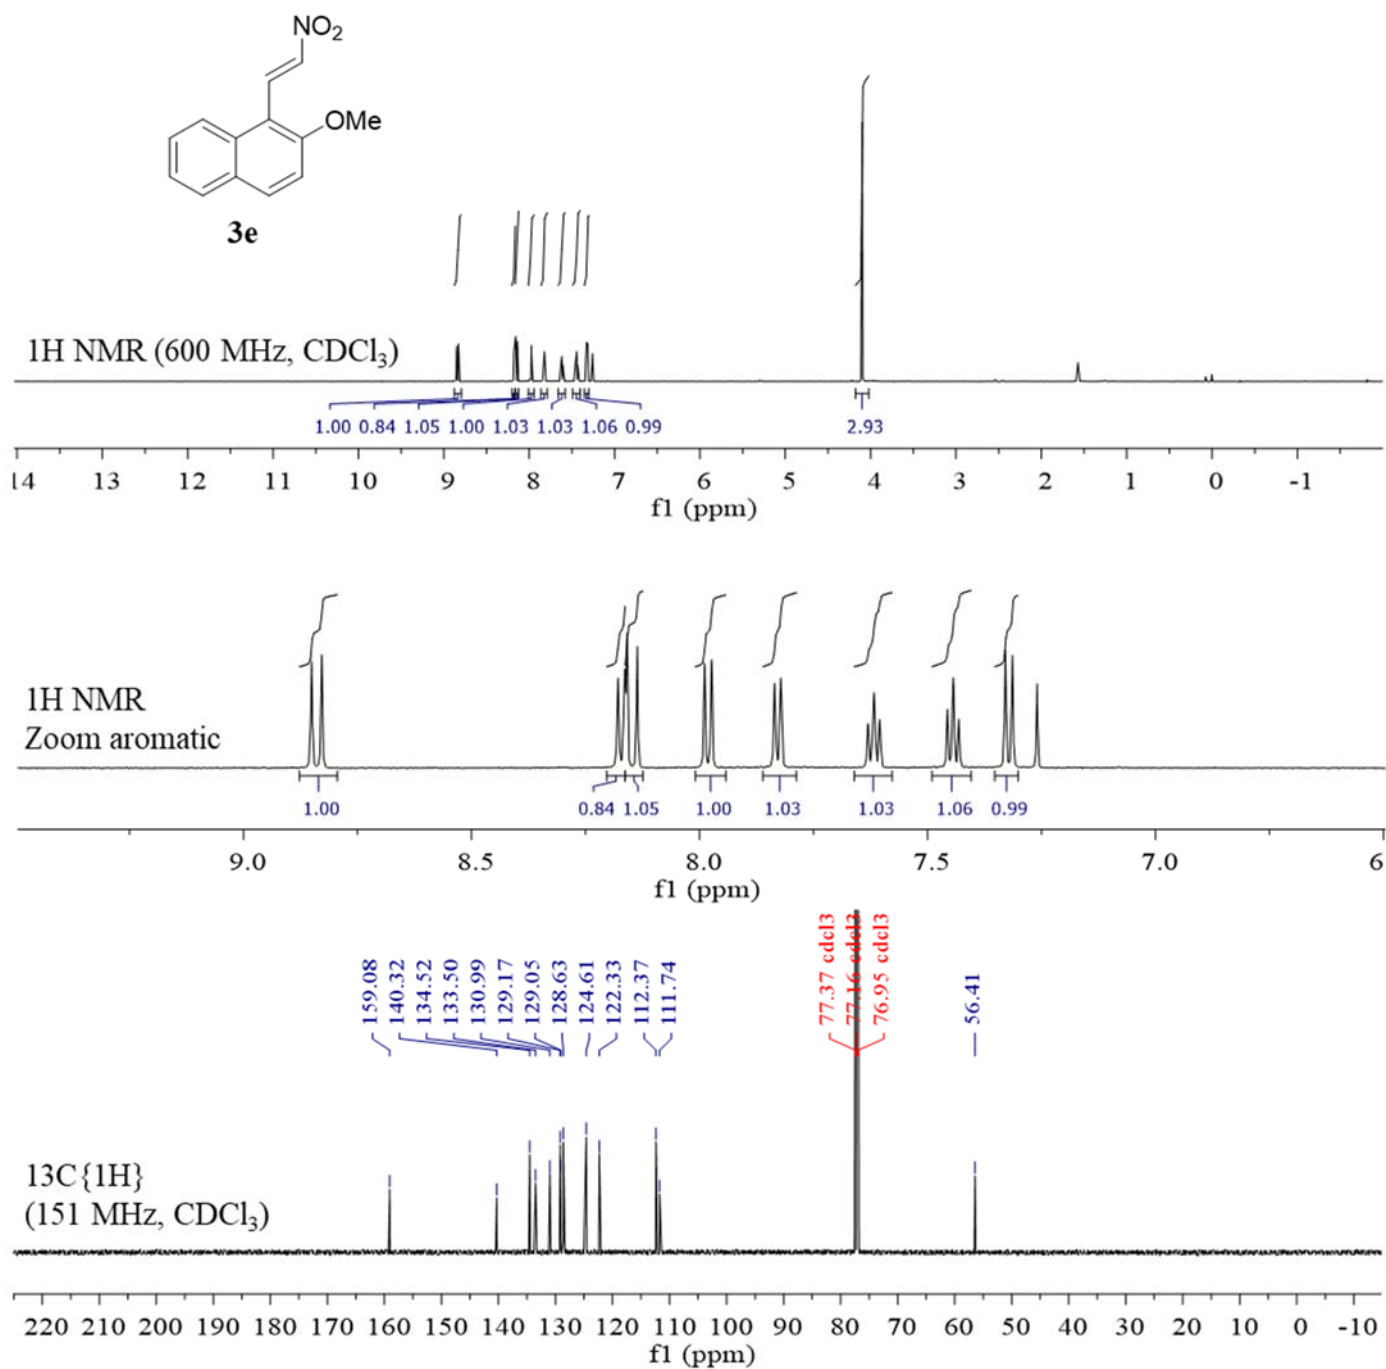

Figure S19. NMR spectra of **3e** in CDCl<sub>3</sub>.



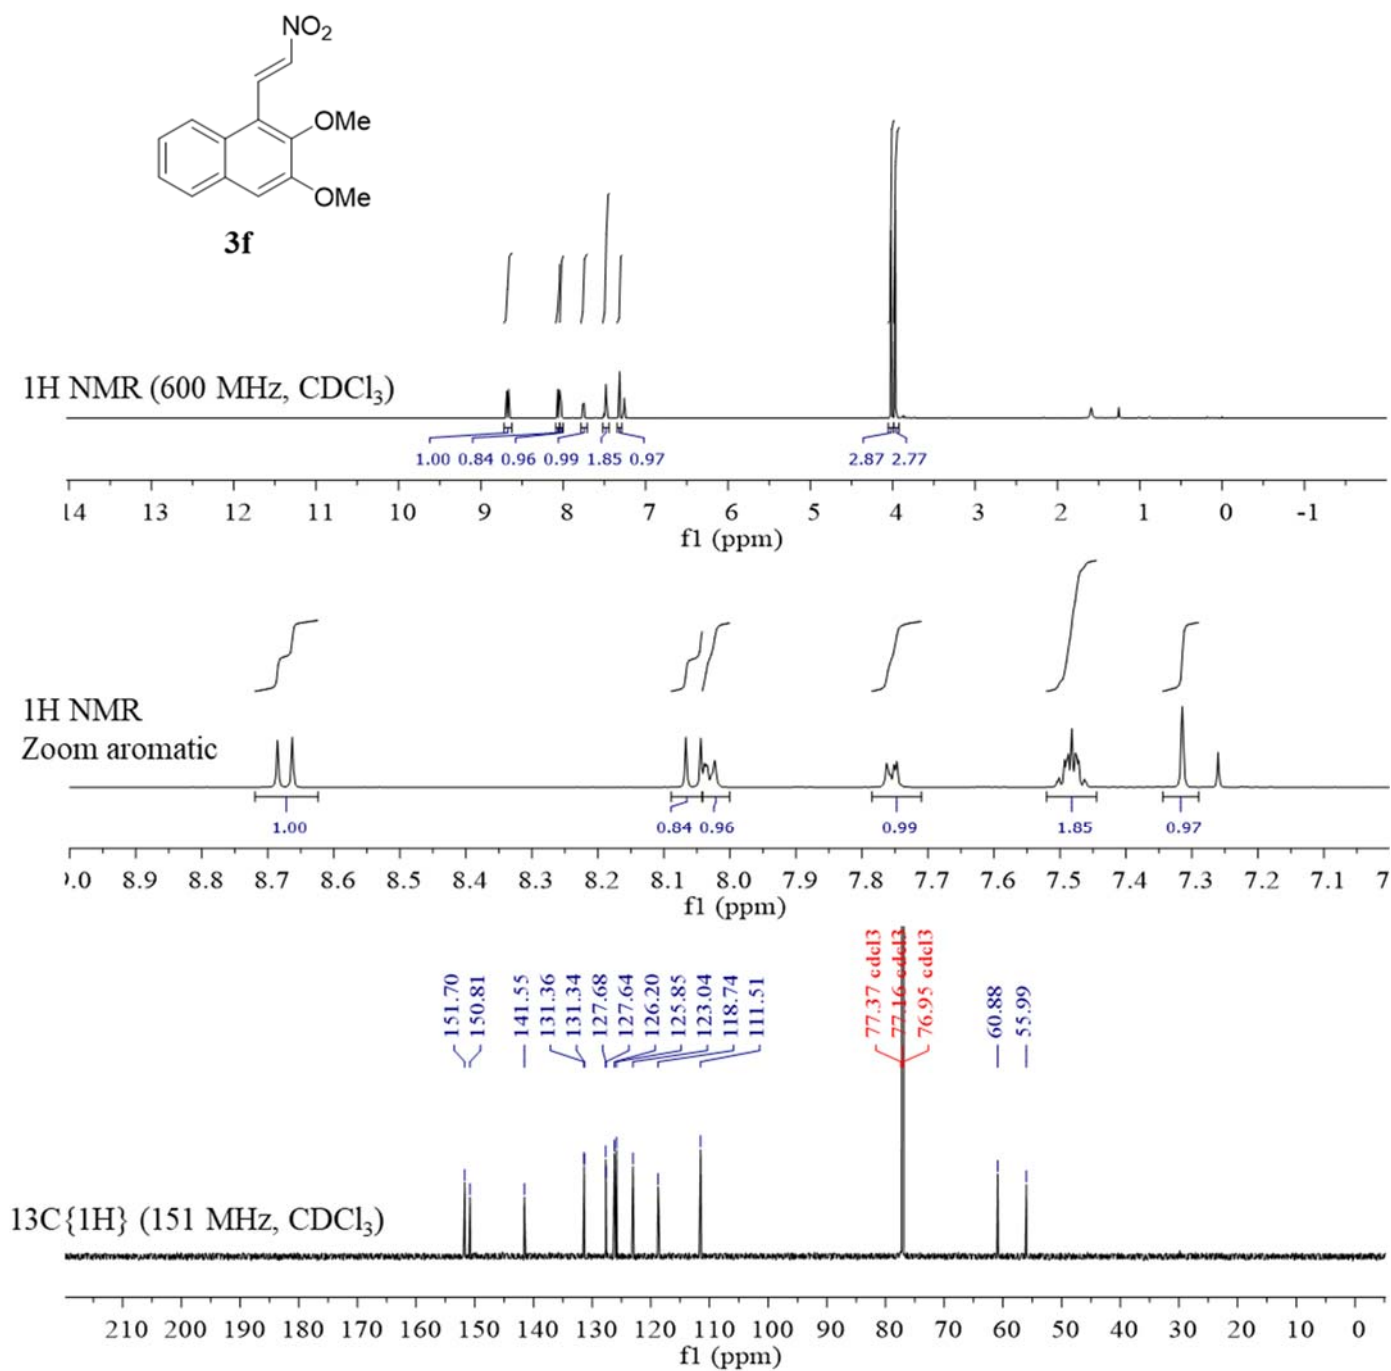

**Figure S20.** NMR spectra of **3f** in CDCl<sub>3</sub>.

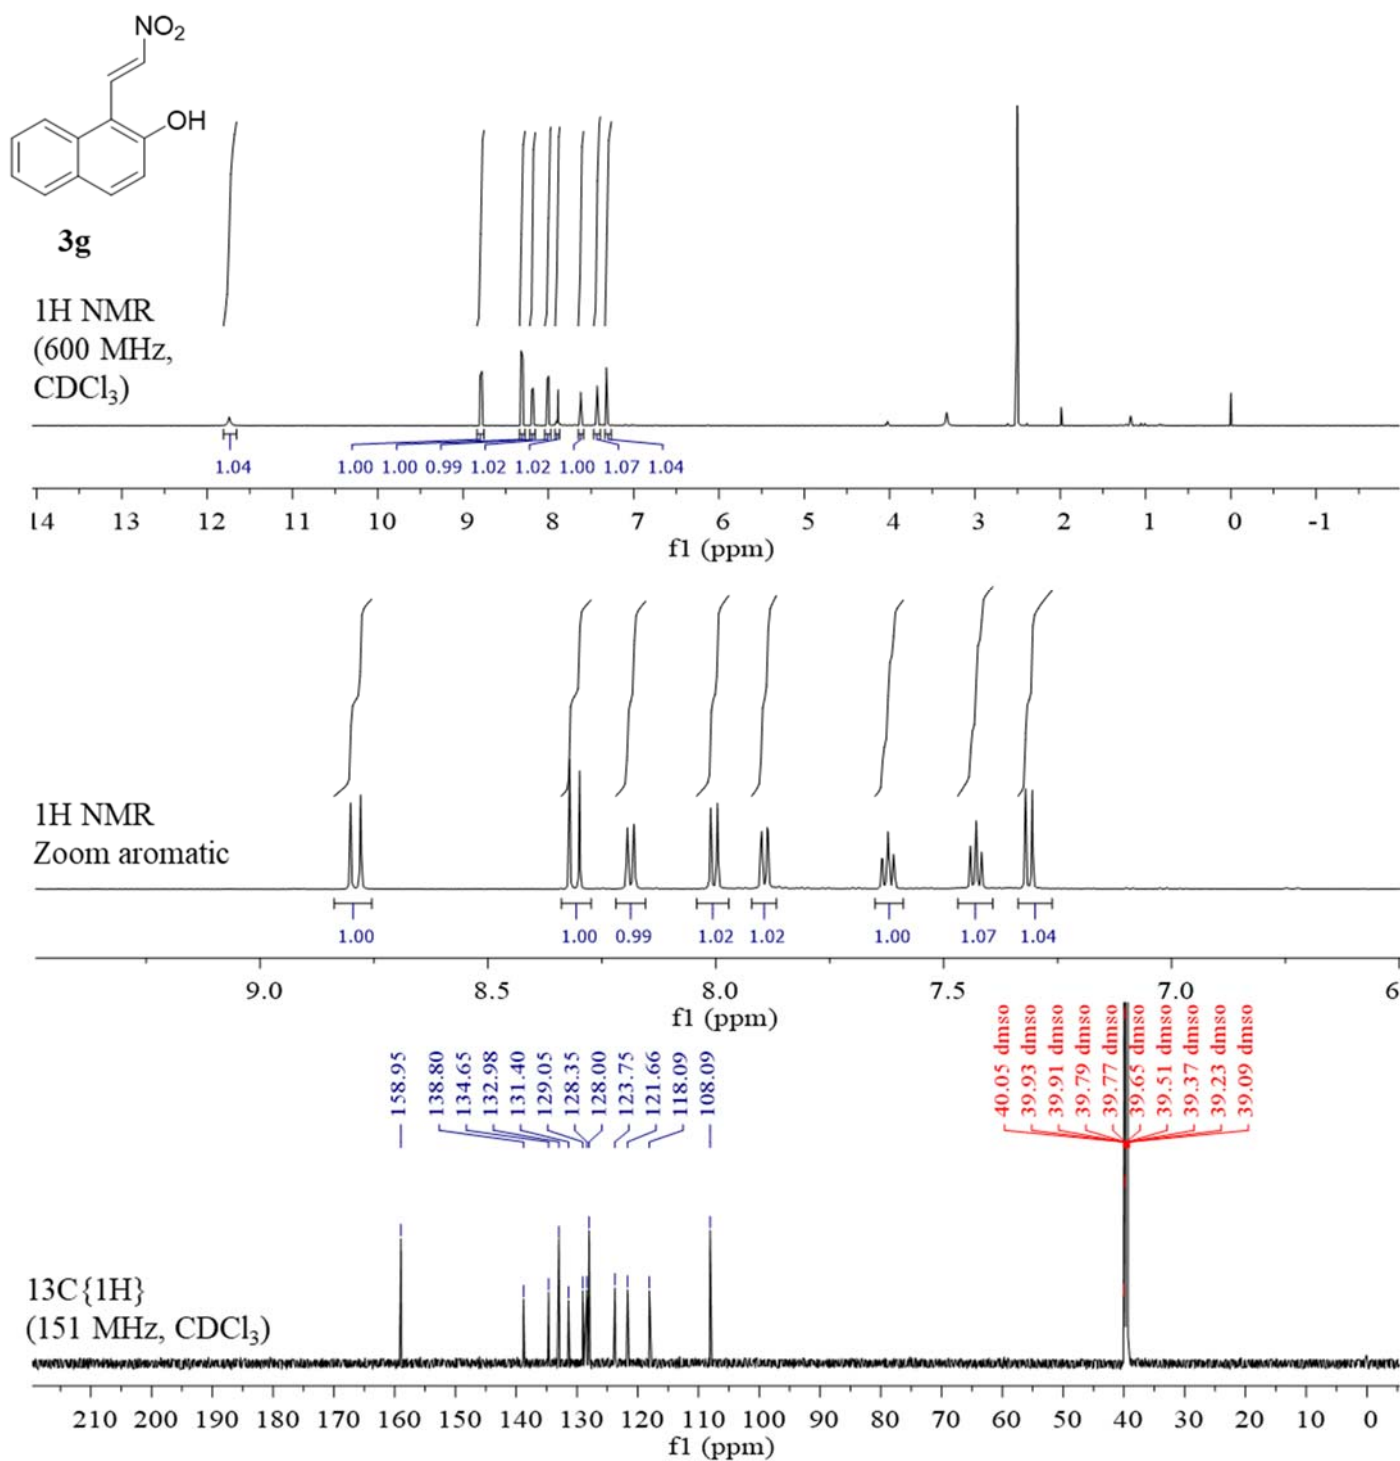

Figure S21. NMR spectra of **3g** in CDCl<sub>3</sub>.

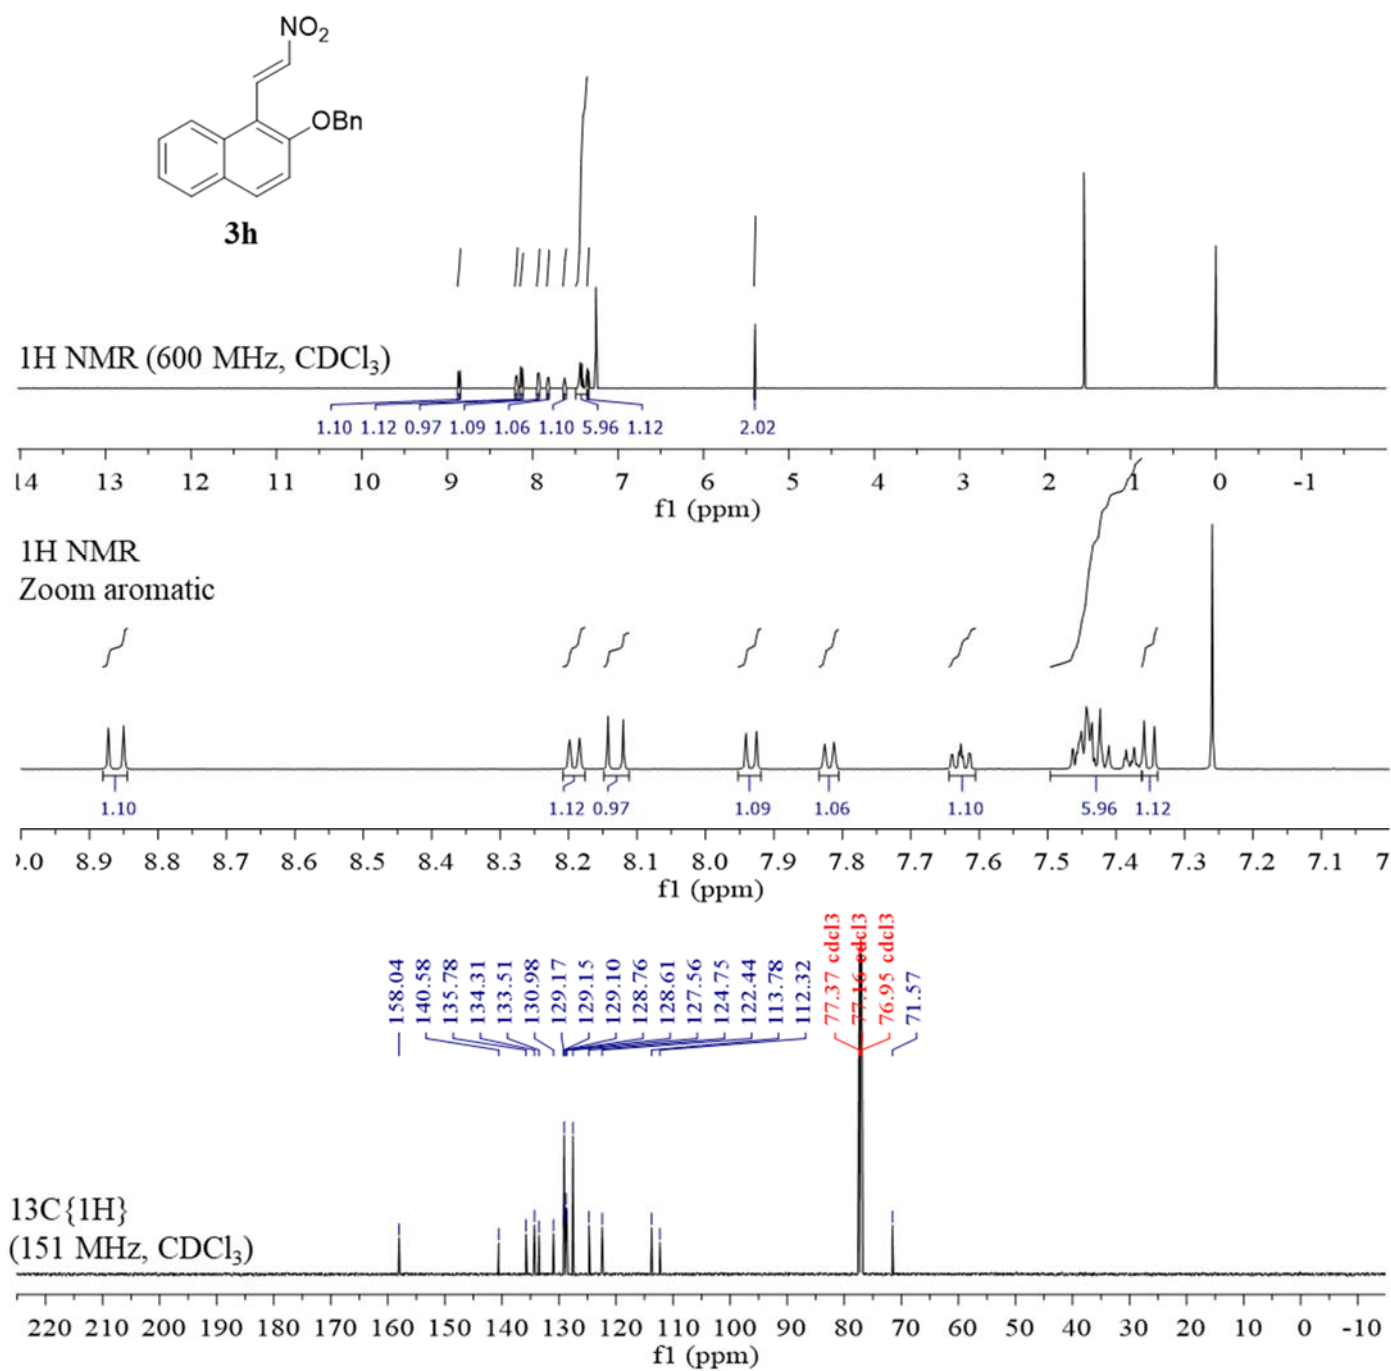

**Figure S22.** NMR spectra of **3h** in CDCl<sub>3</sub>.

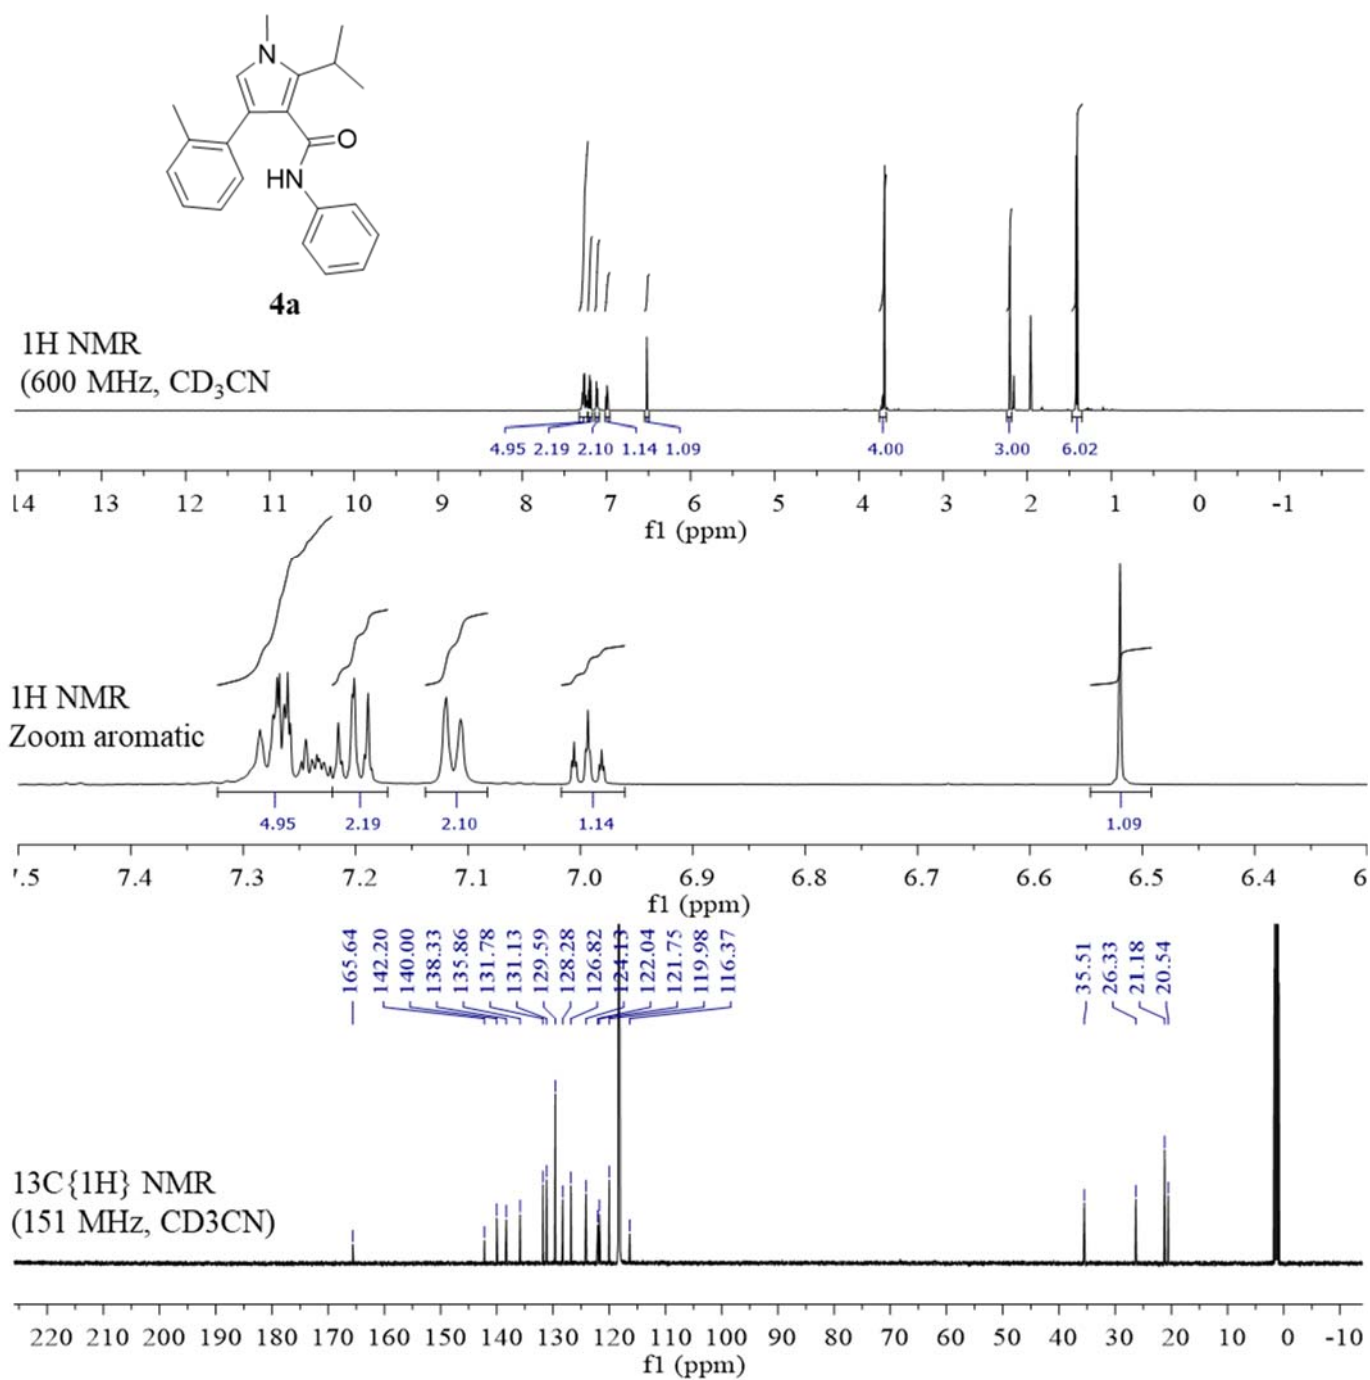

**Figure S23.** NMR spectra of **4a** in CD<sub>3</sub>CN.

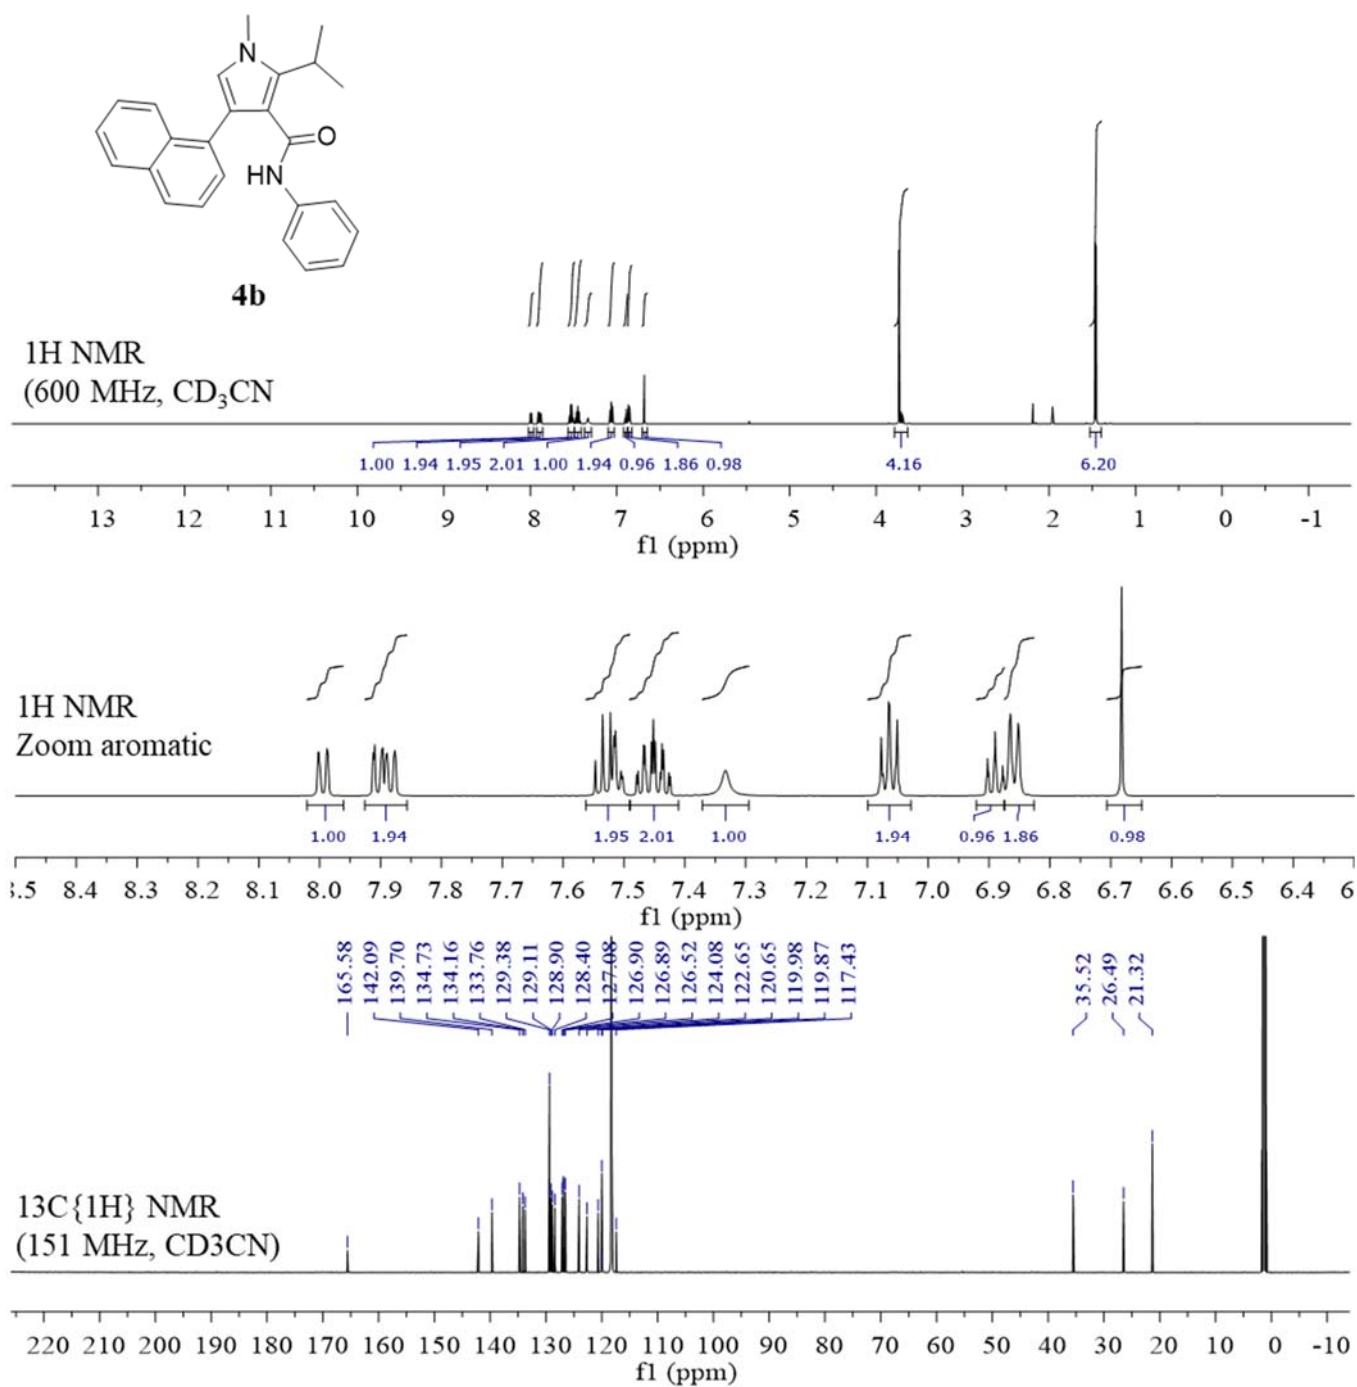

**Figure S24.** NMR spectra of **4b** in CD<sub>3</sub>CN.

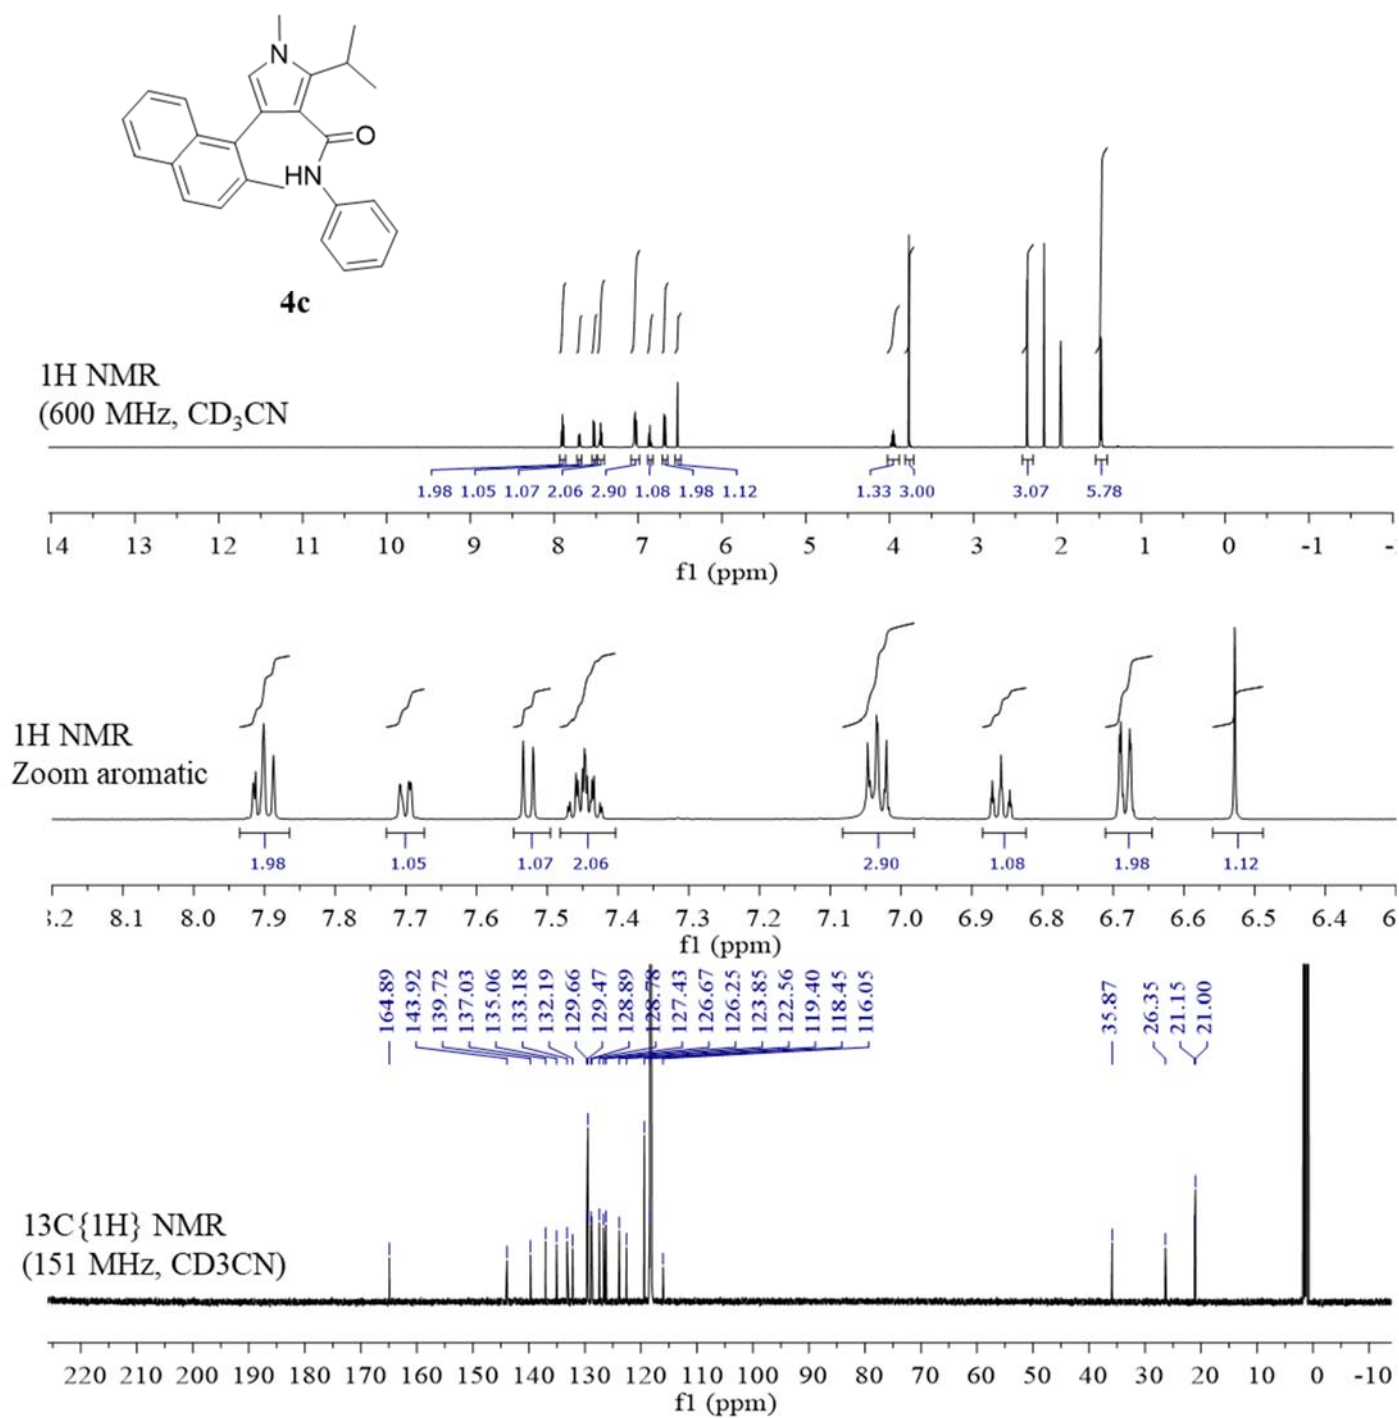

**Figure S25.** NMR spectra of **4c** in CD<sub>3</sub>CN.

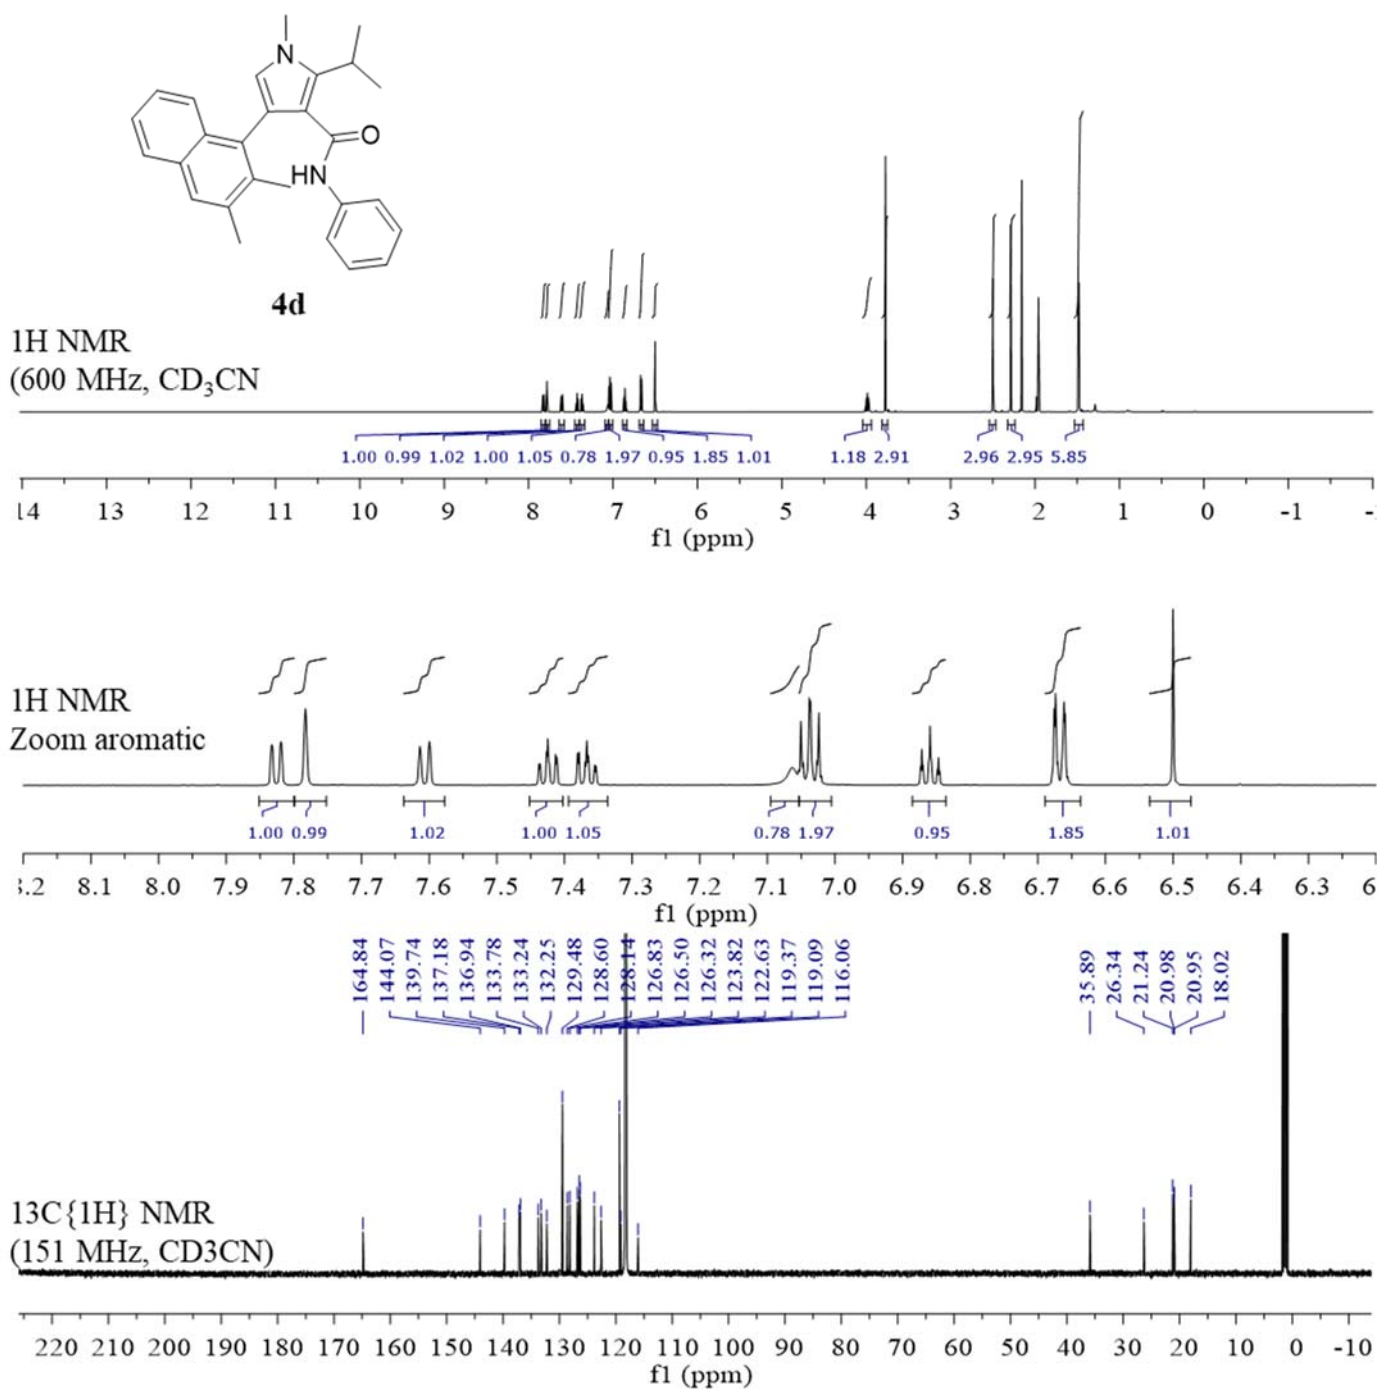

**Figure S26.** NMR spectra of **4d** in CD<sub>3</sub>CN.



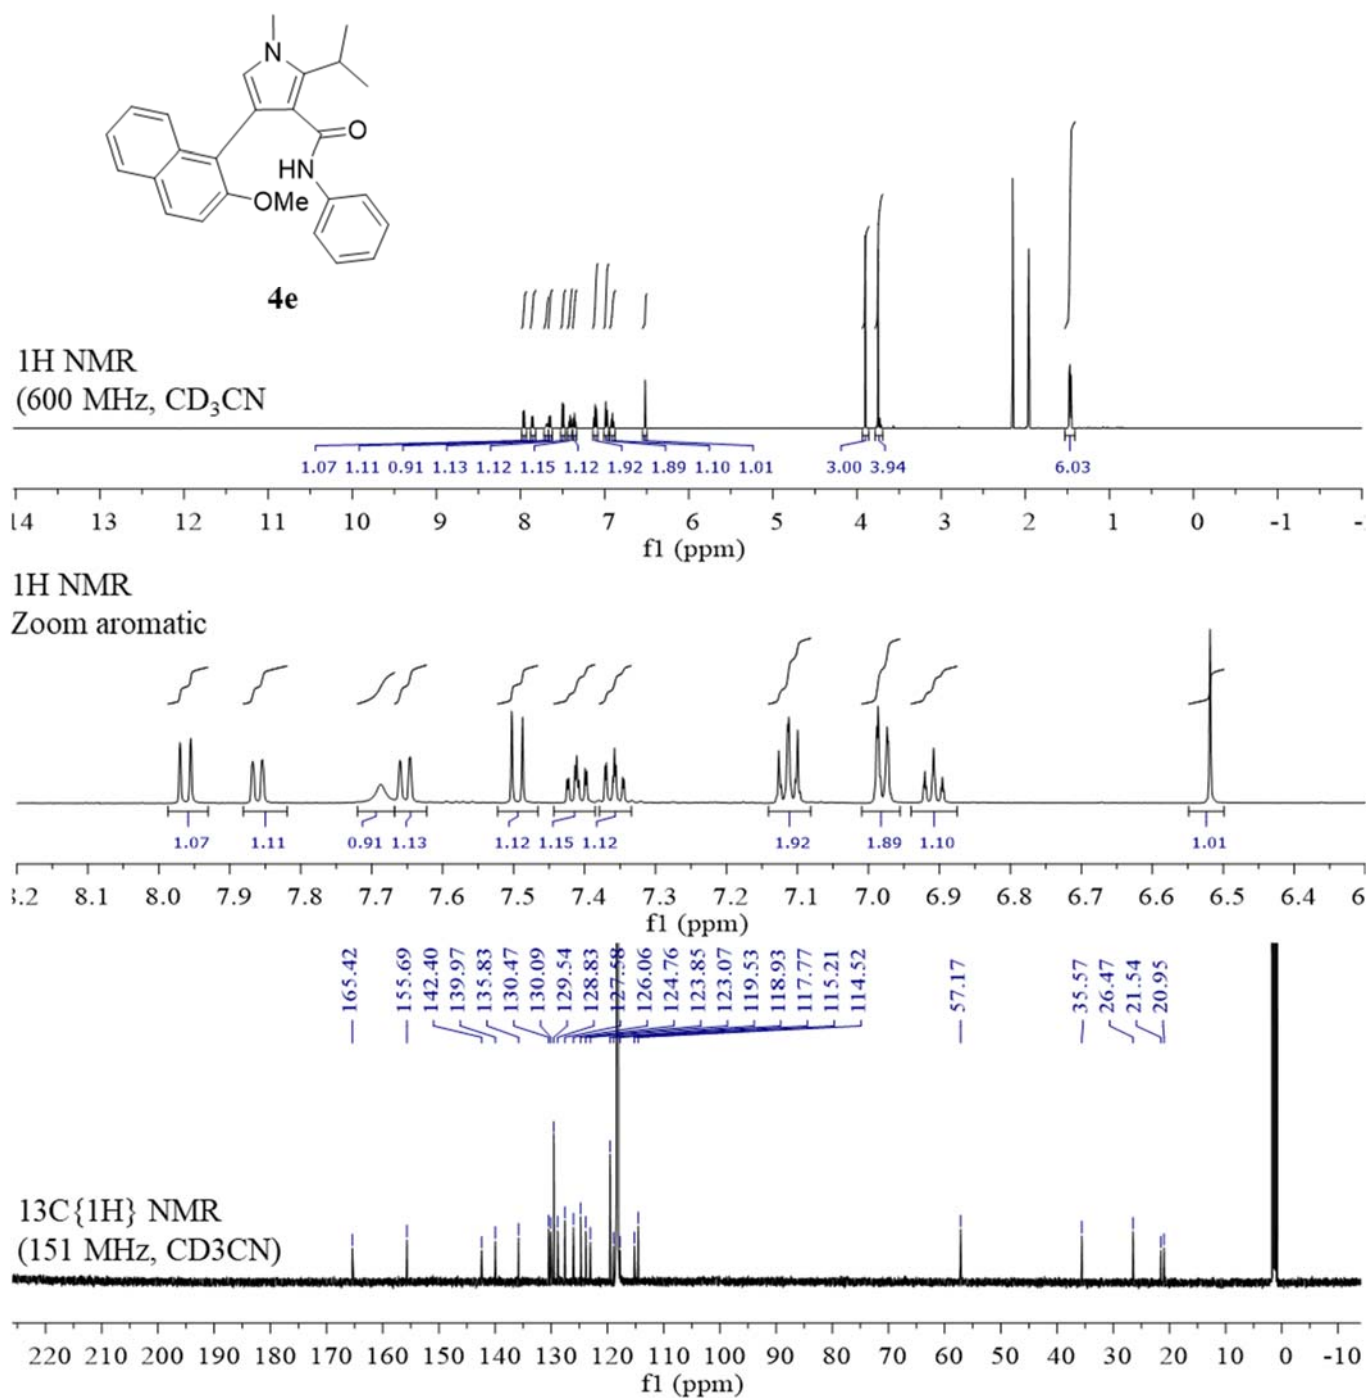

**Figure S27.** NMR spectra of **4e** in CD<sub>3</sub>CN.



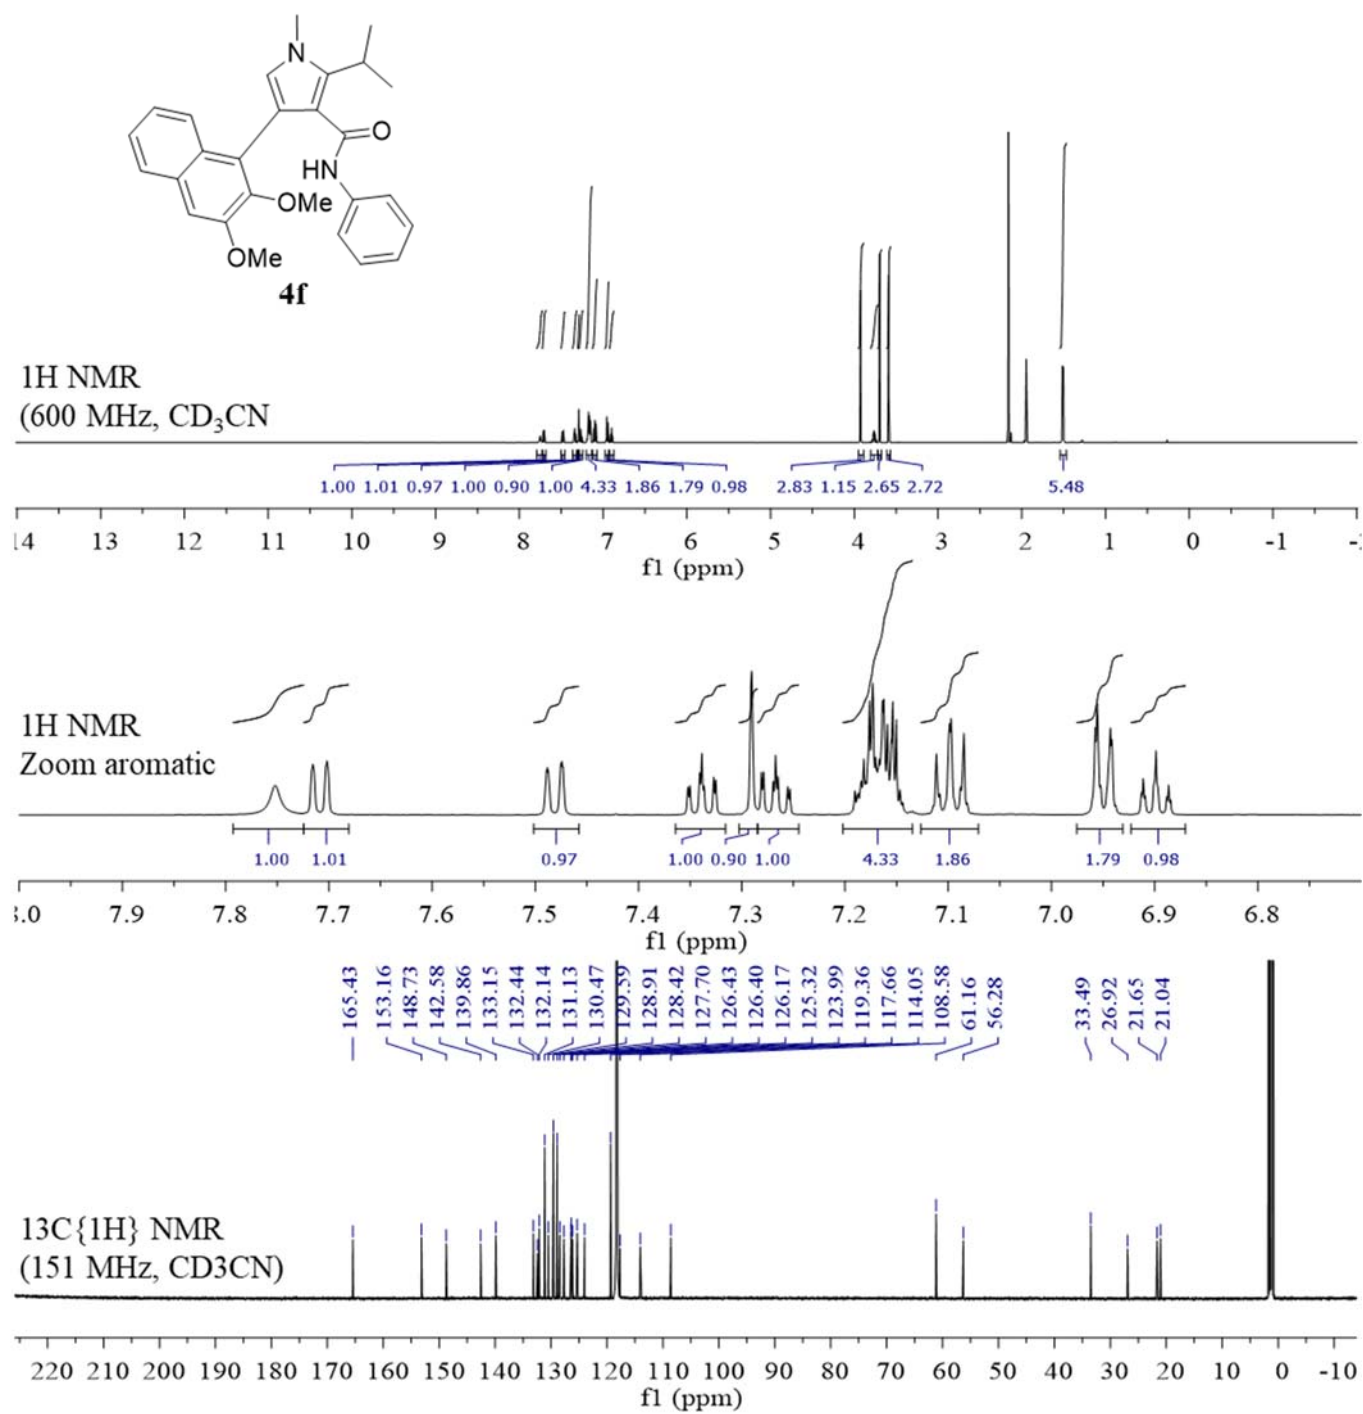

**Figure S28.** NMR spectra of **4f** in CD<sub>3</sub>CN.

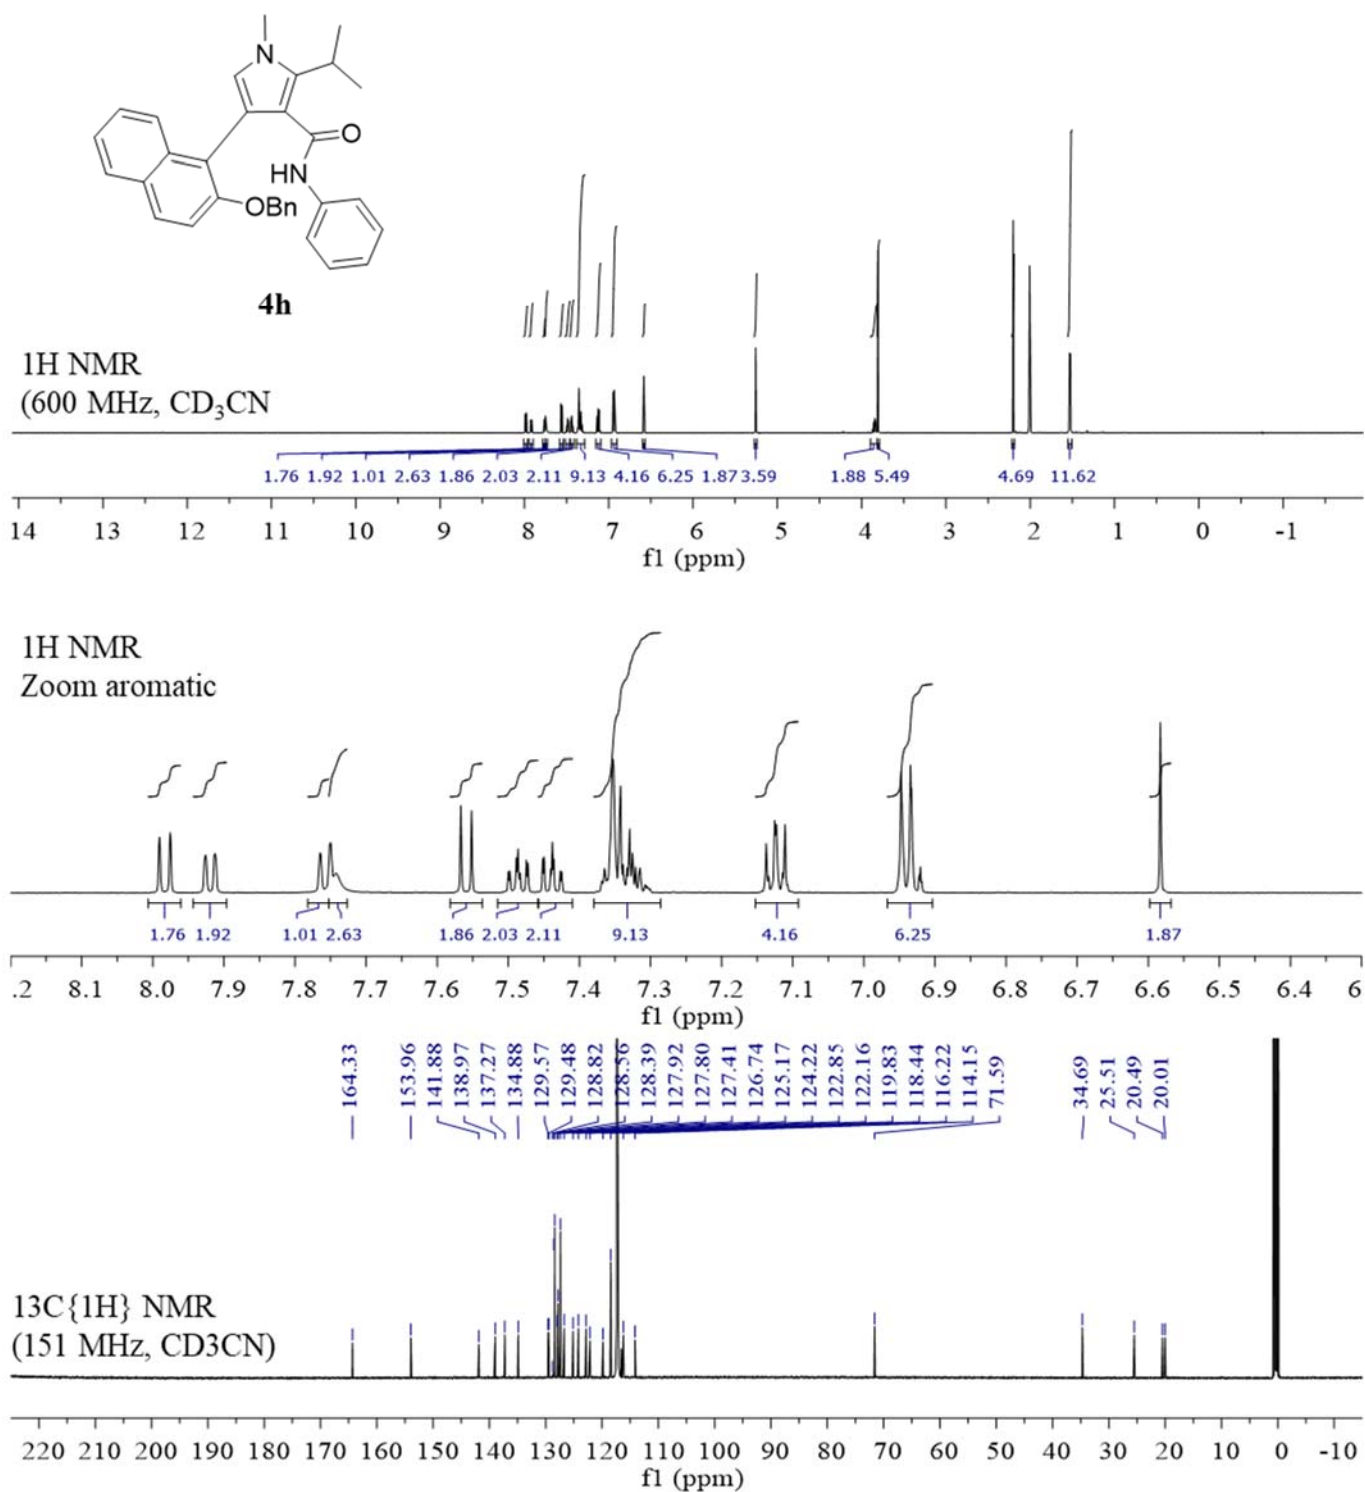

**Figure S29.** NMR spectra of **4h** in CD<sub>3</sub>CN.

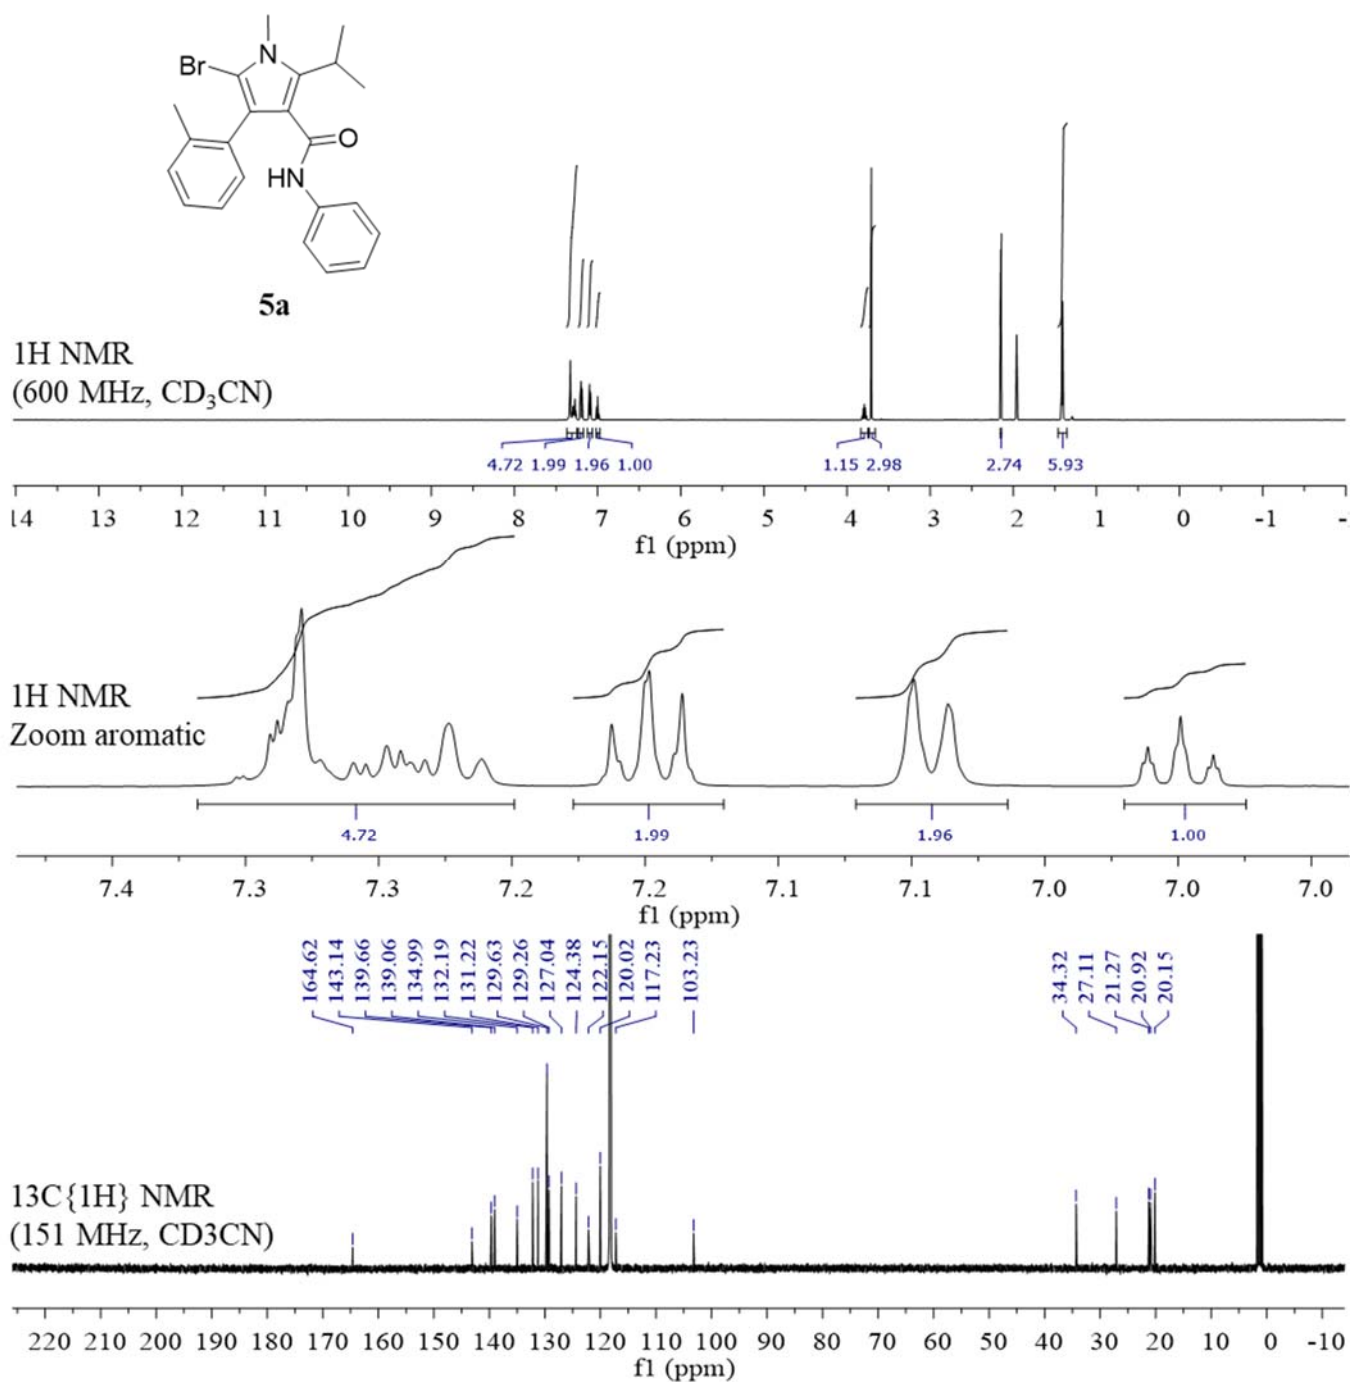

**Figure S30.** NMR spectra of **5a** in CD<sub>3</sub>CN.

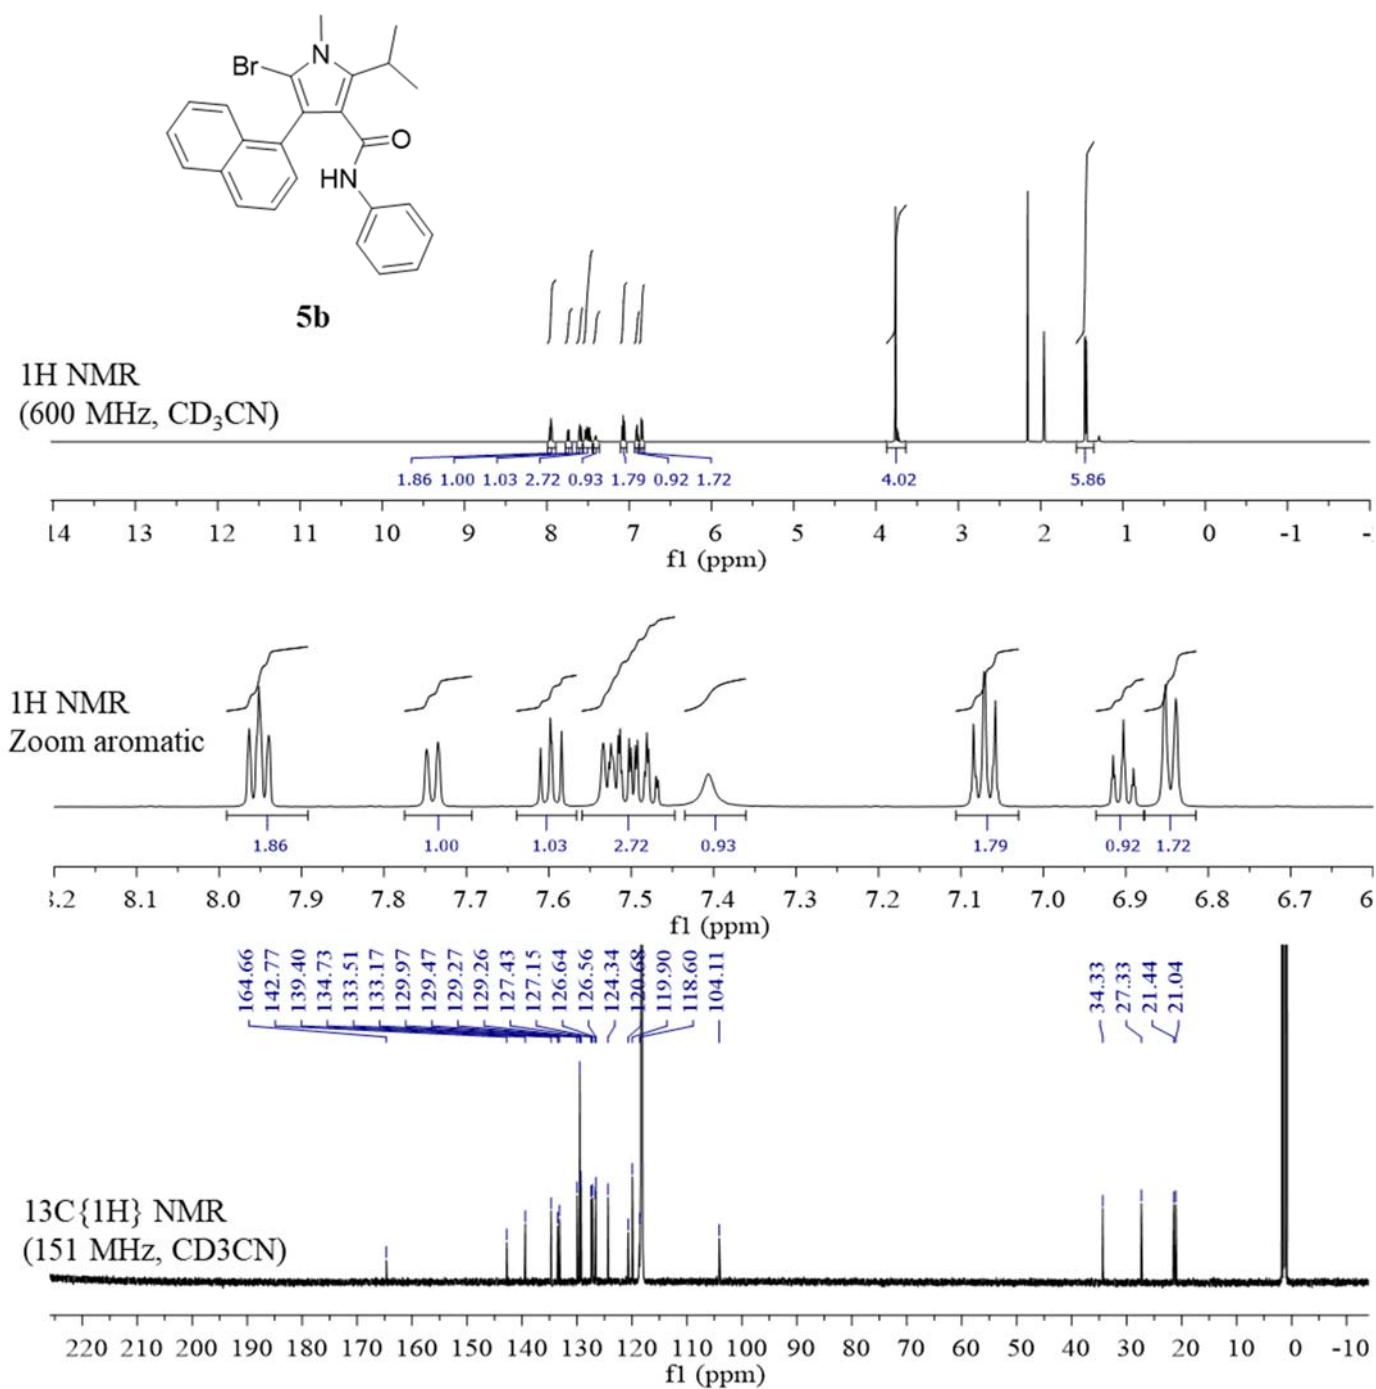

**Figure S31.** NMR spectra of **5b** in CD<sub>3</sub>CN.

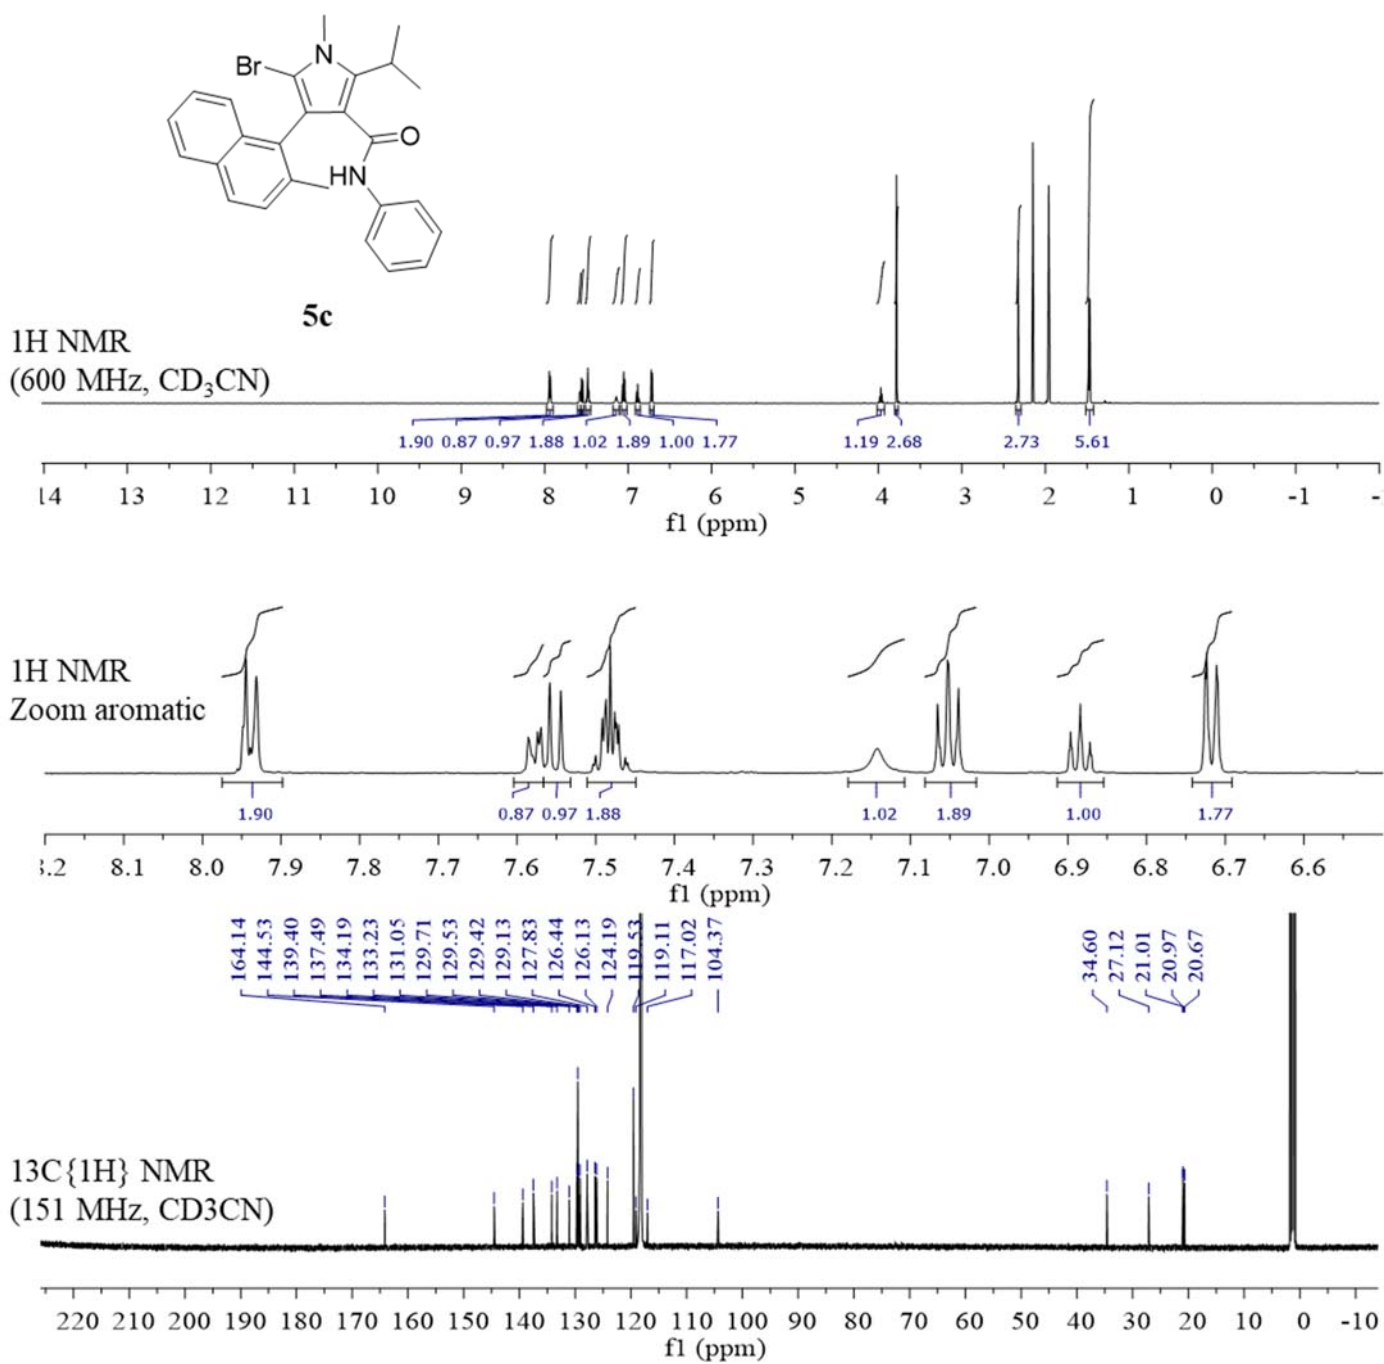

**Figure S32.** NMR spectra of **5c** in CD<sub>3</sub>CN.

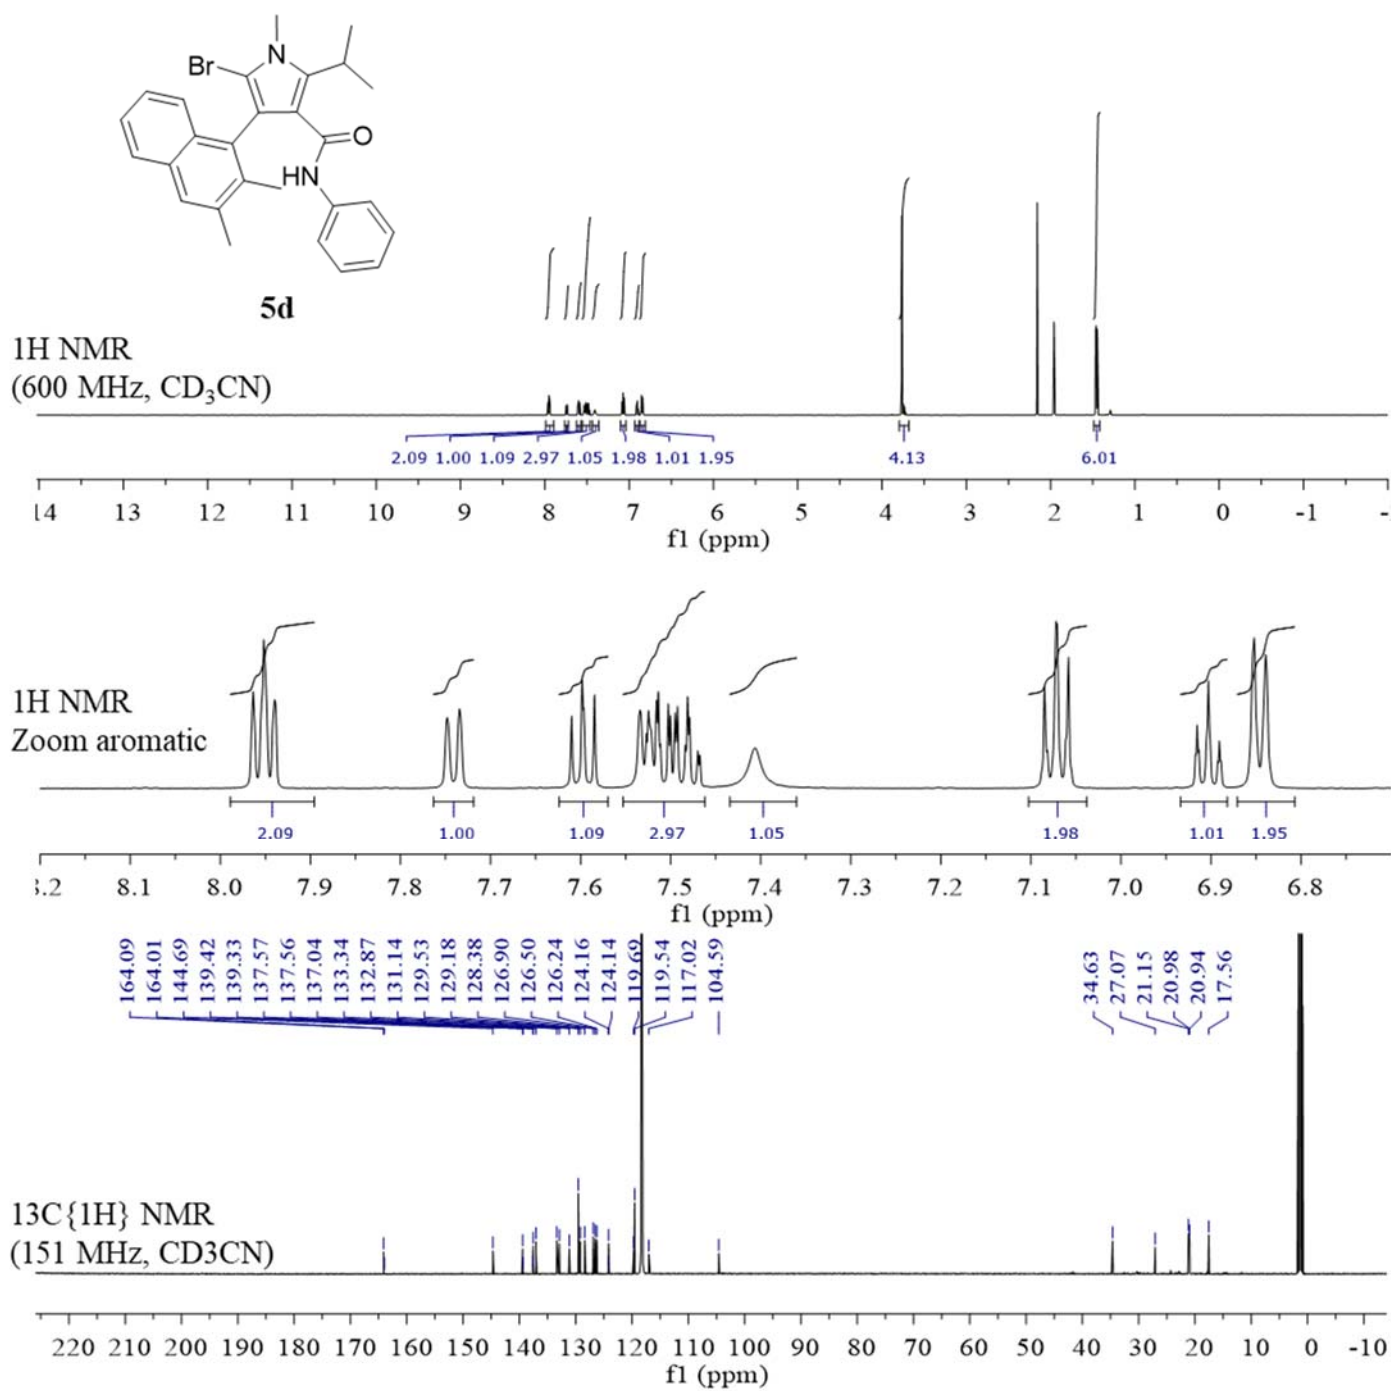

**Figure S33.** NMR spectra of **5d** in CD<sub>3</sub>CN.

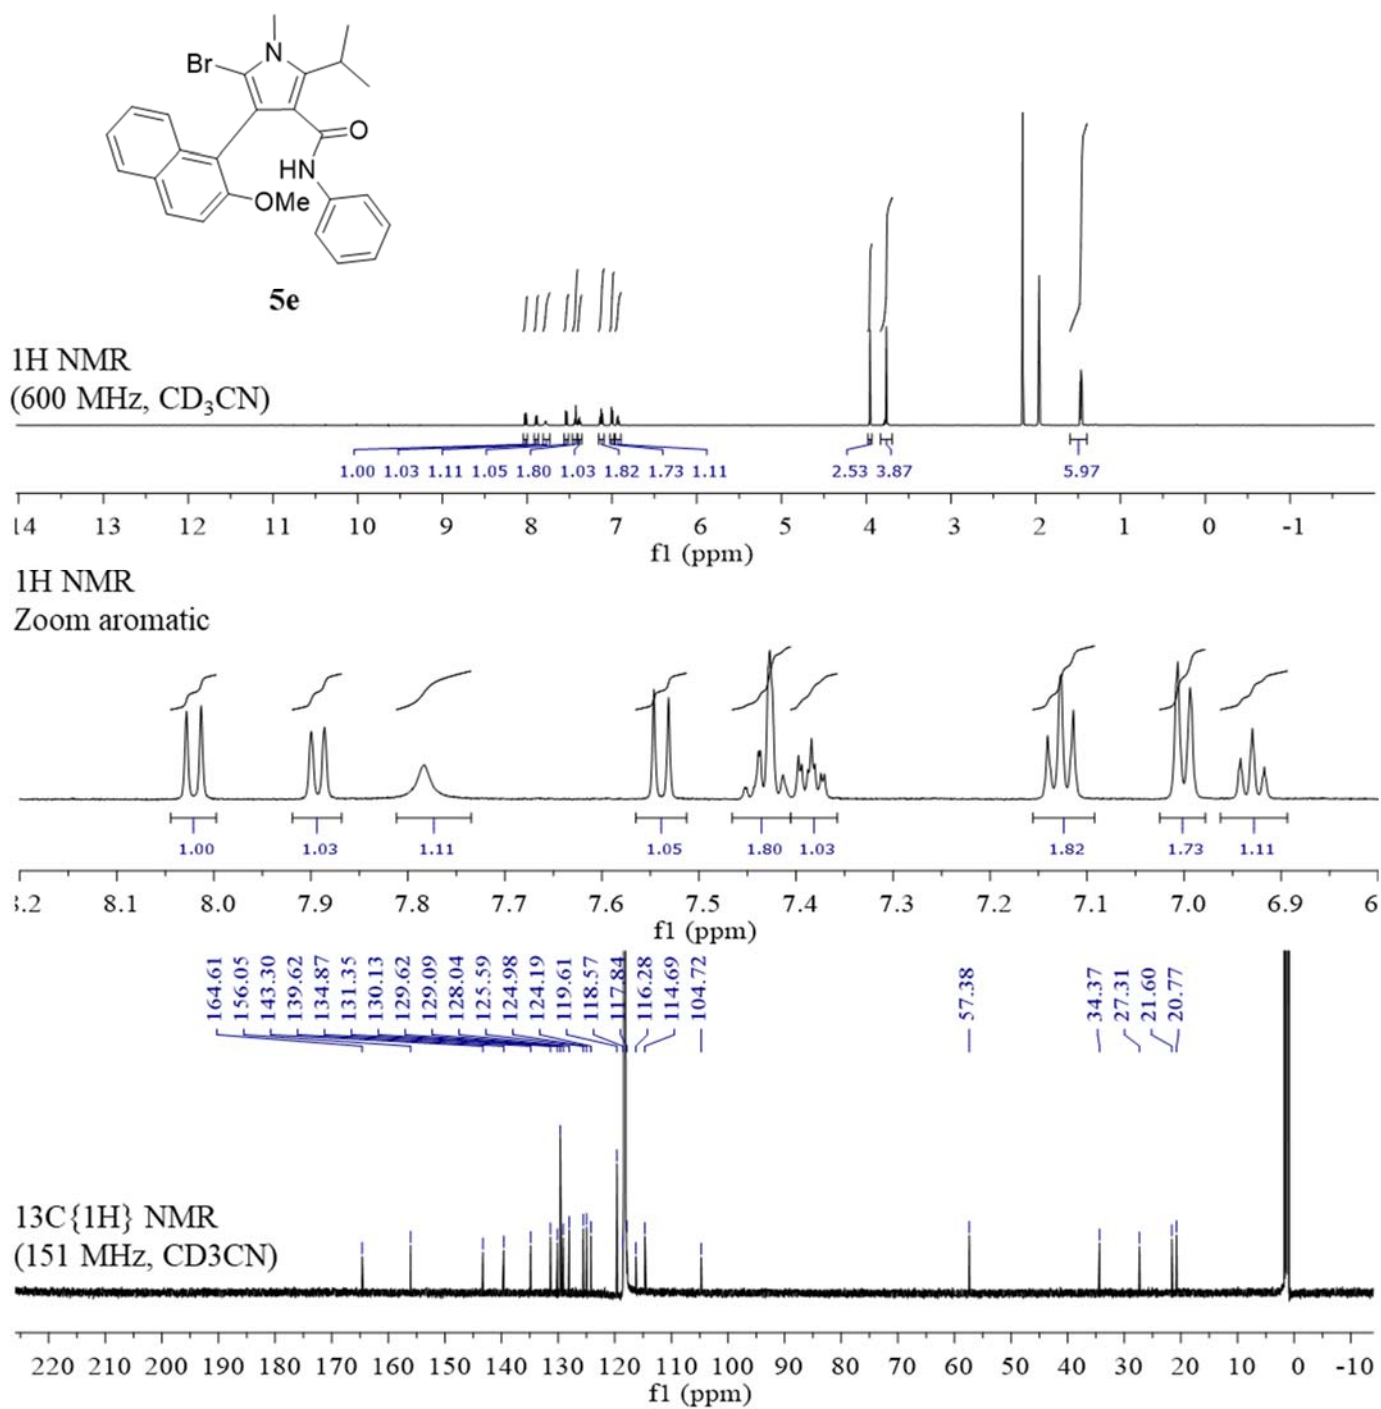

**Figure S34.** NMR spectra of **5e** in CD<sub>3</sub>CN.



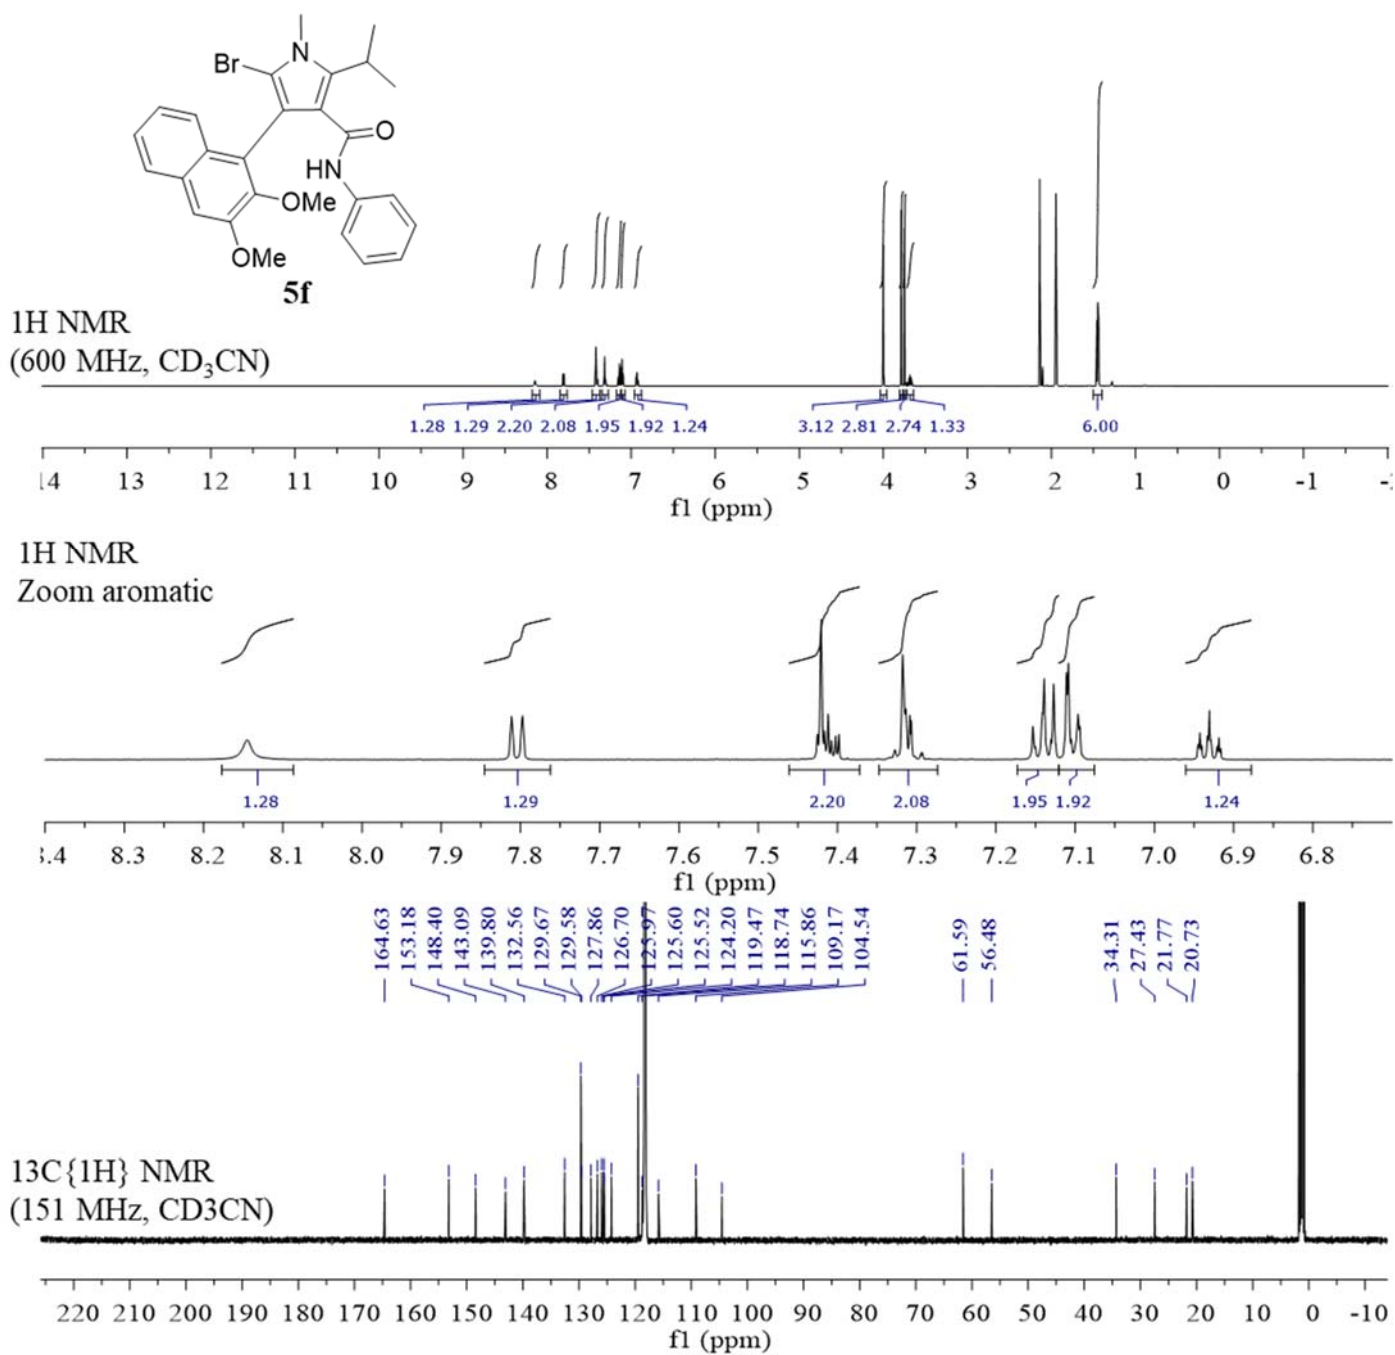

**Figure S35.** NMR spectra of **5f** in CD<sub>3</sub>CN.



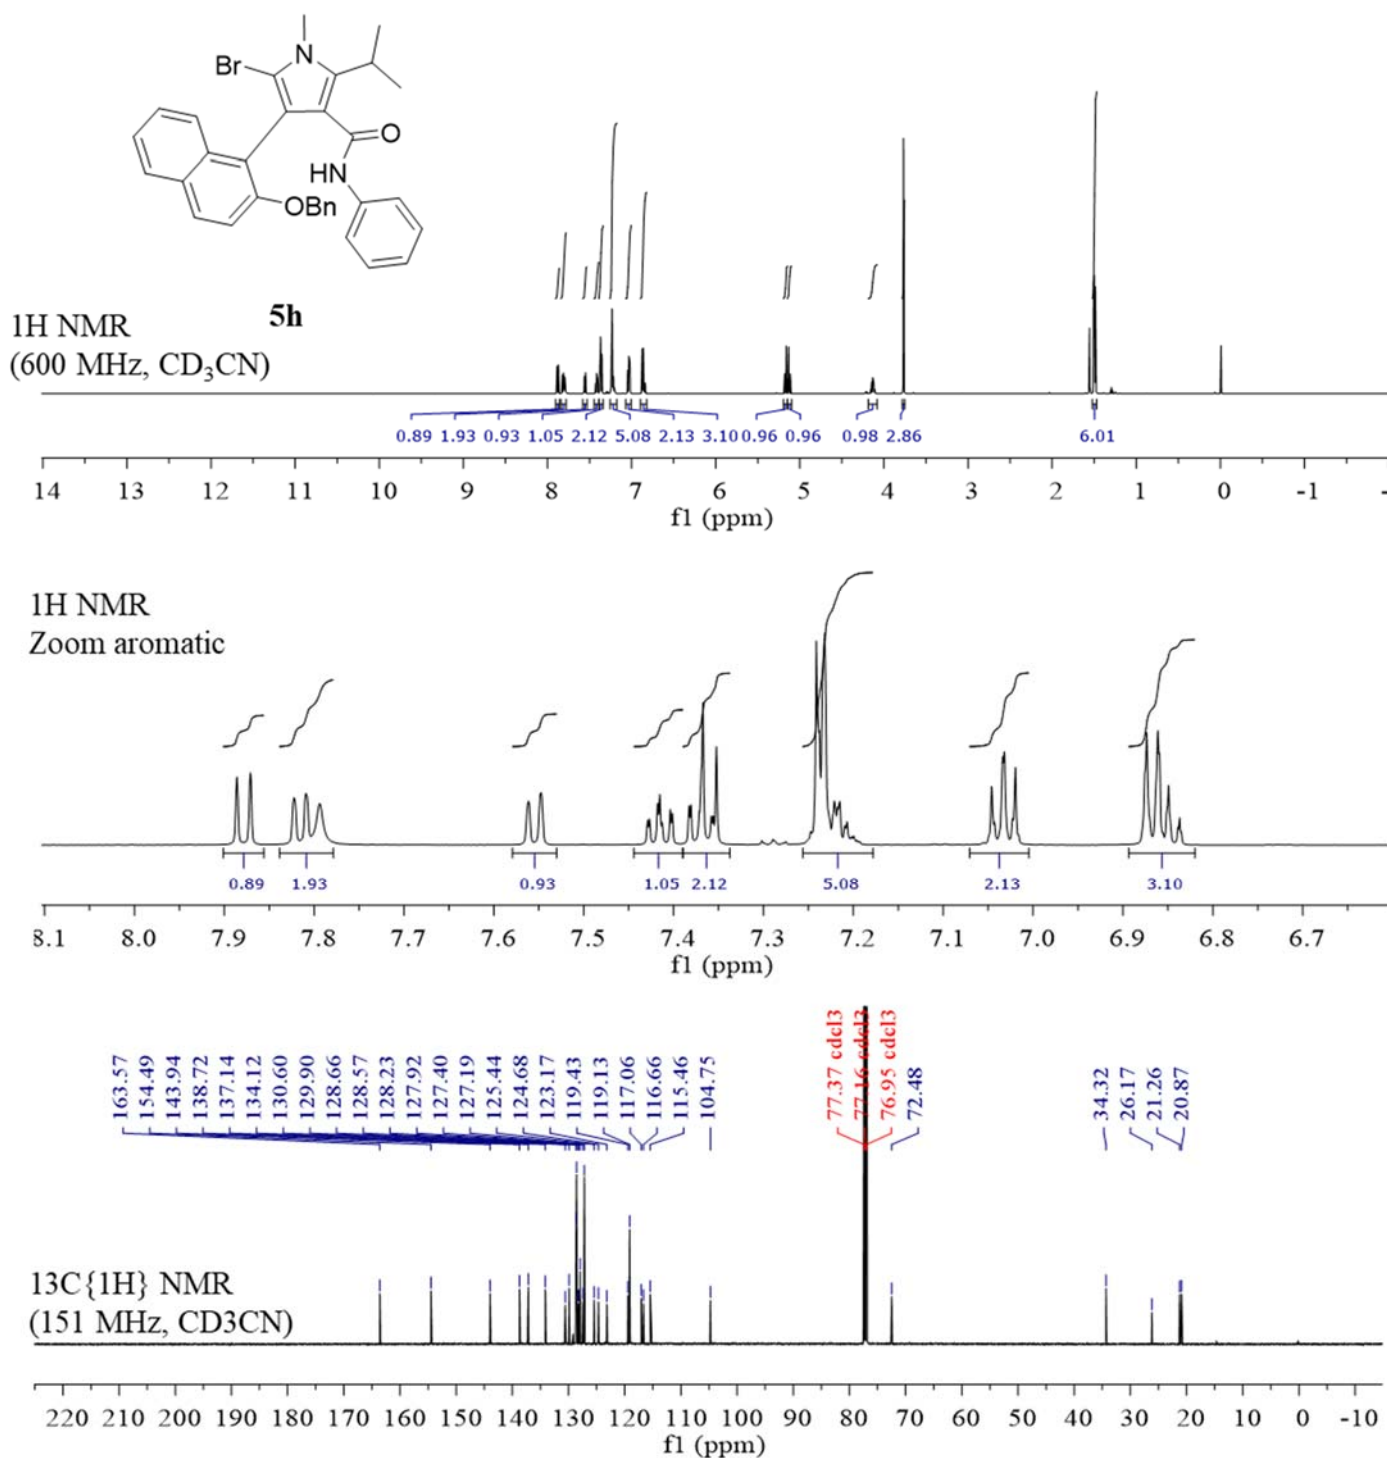

**Figure S36.** NMR spectra of **5h** in CD<sub>3</sub>CN.

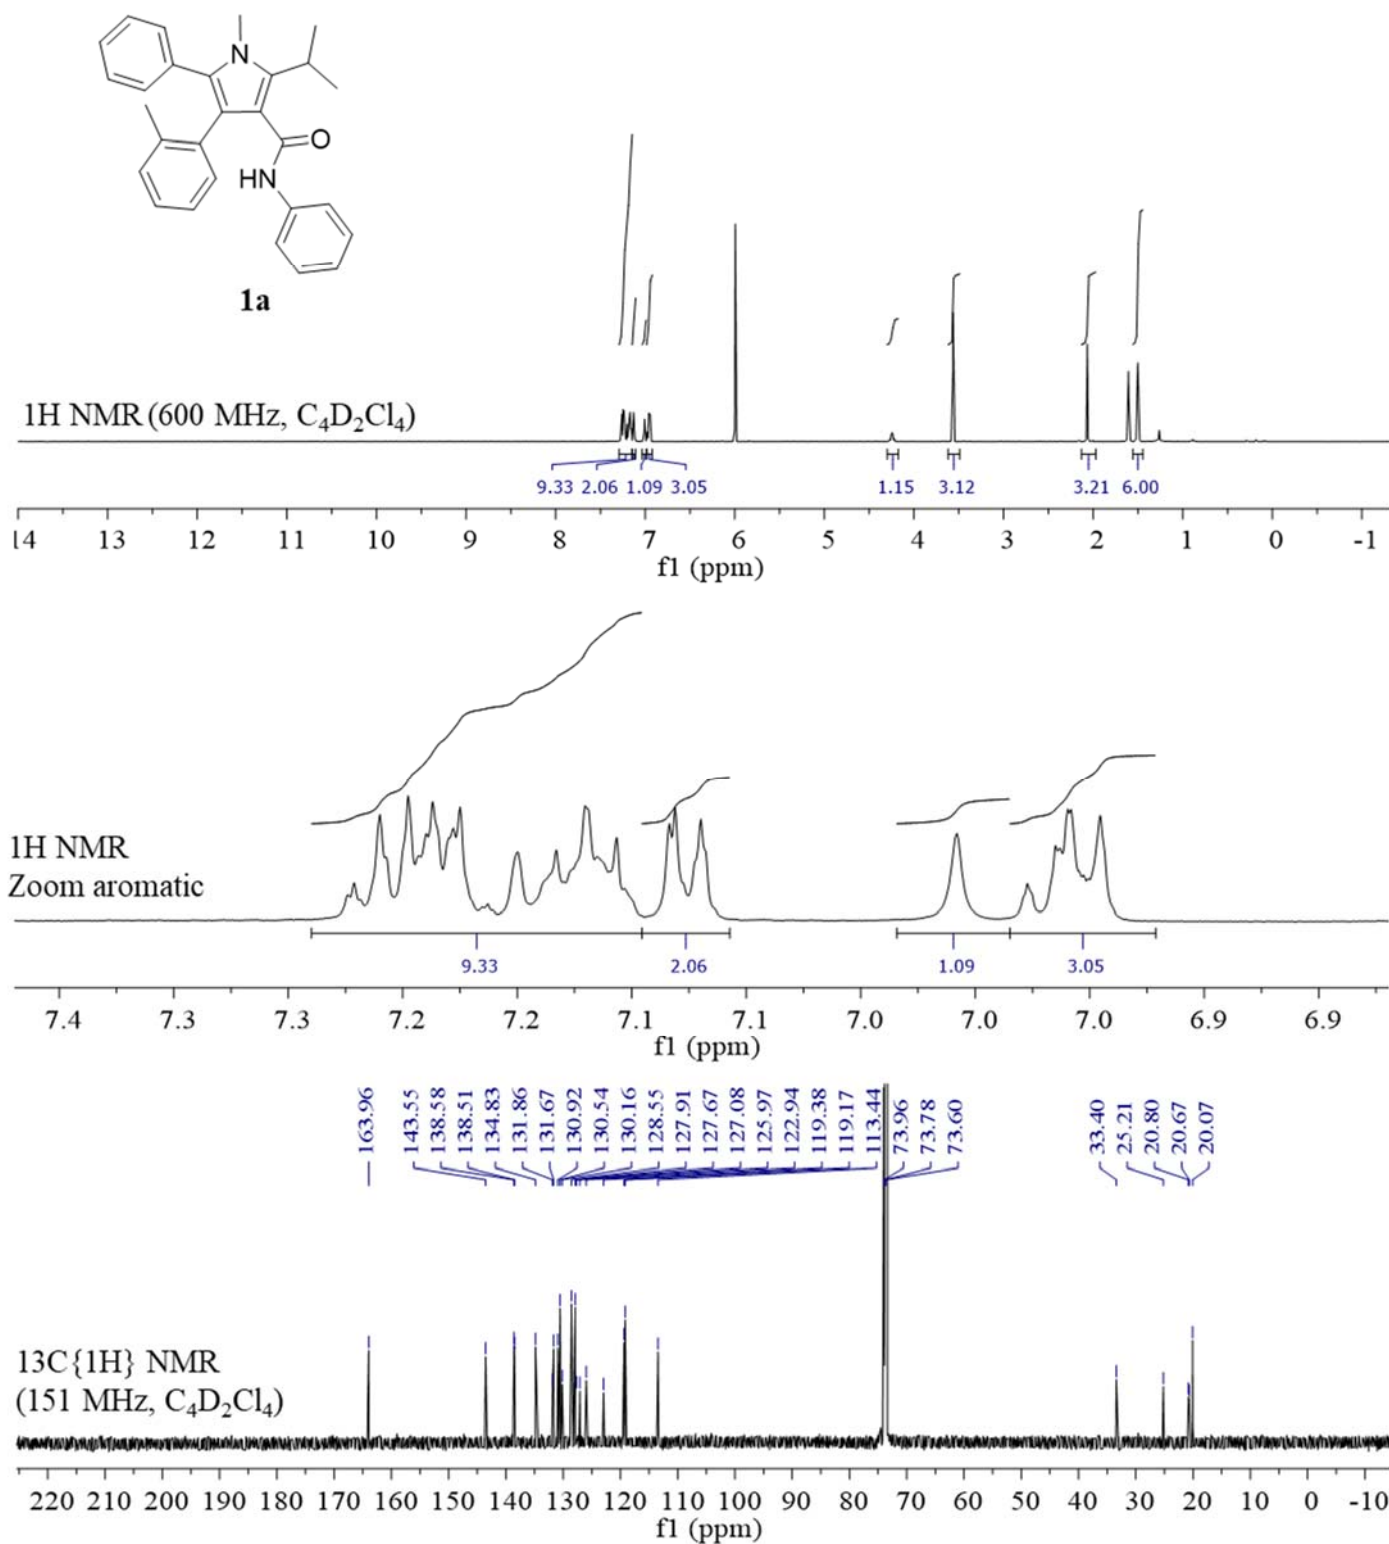

**Figure S37.** NMR spectra of **1a** in C<sub>2</sub>D<sub>2</sub>Cl<sub>4</sub>.

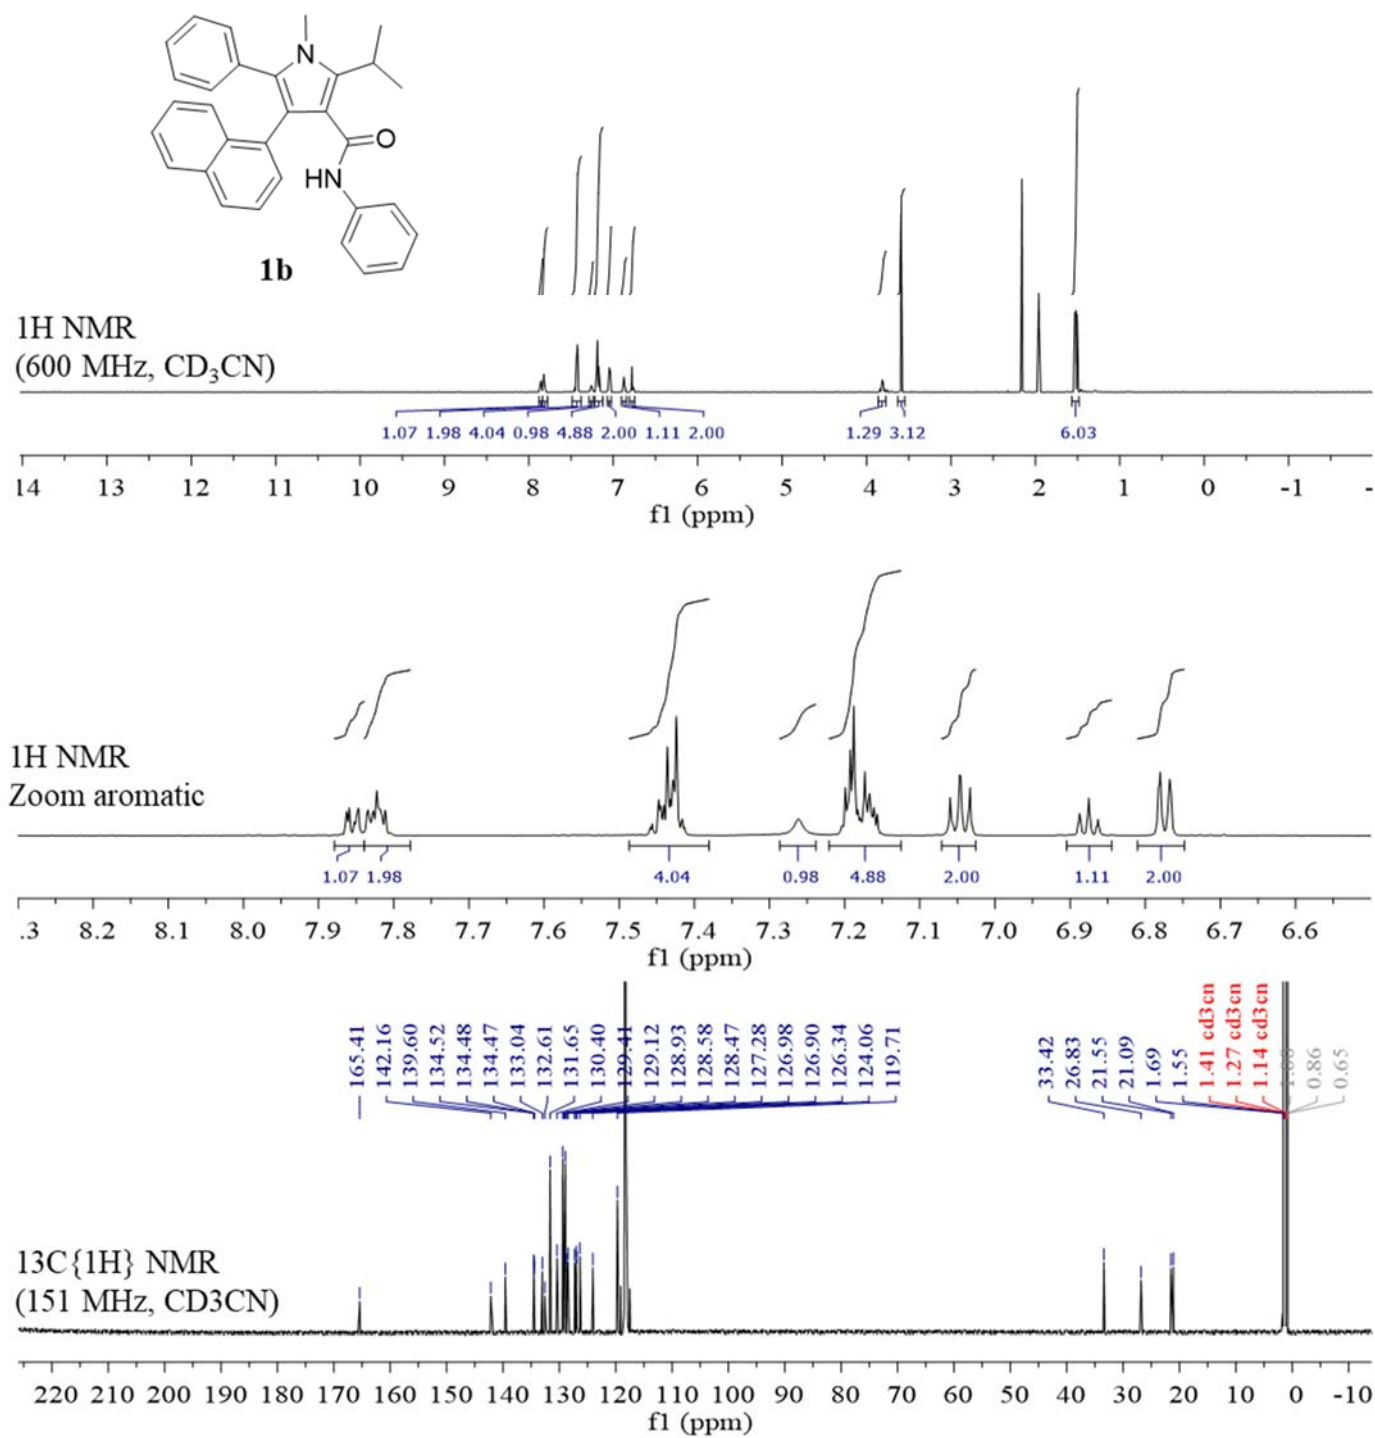

**Figure S38.** NMR spectra of **1b** in CD<sub>3</sub>CN.

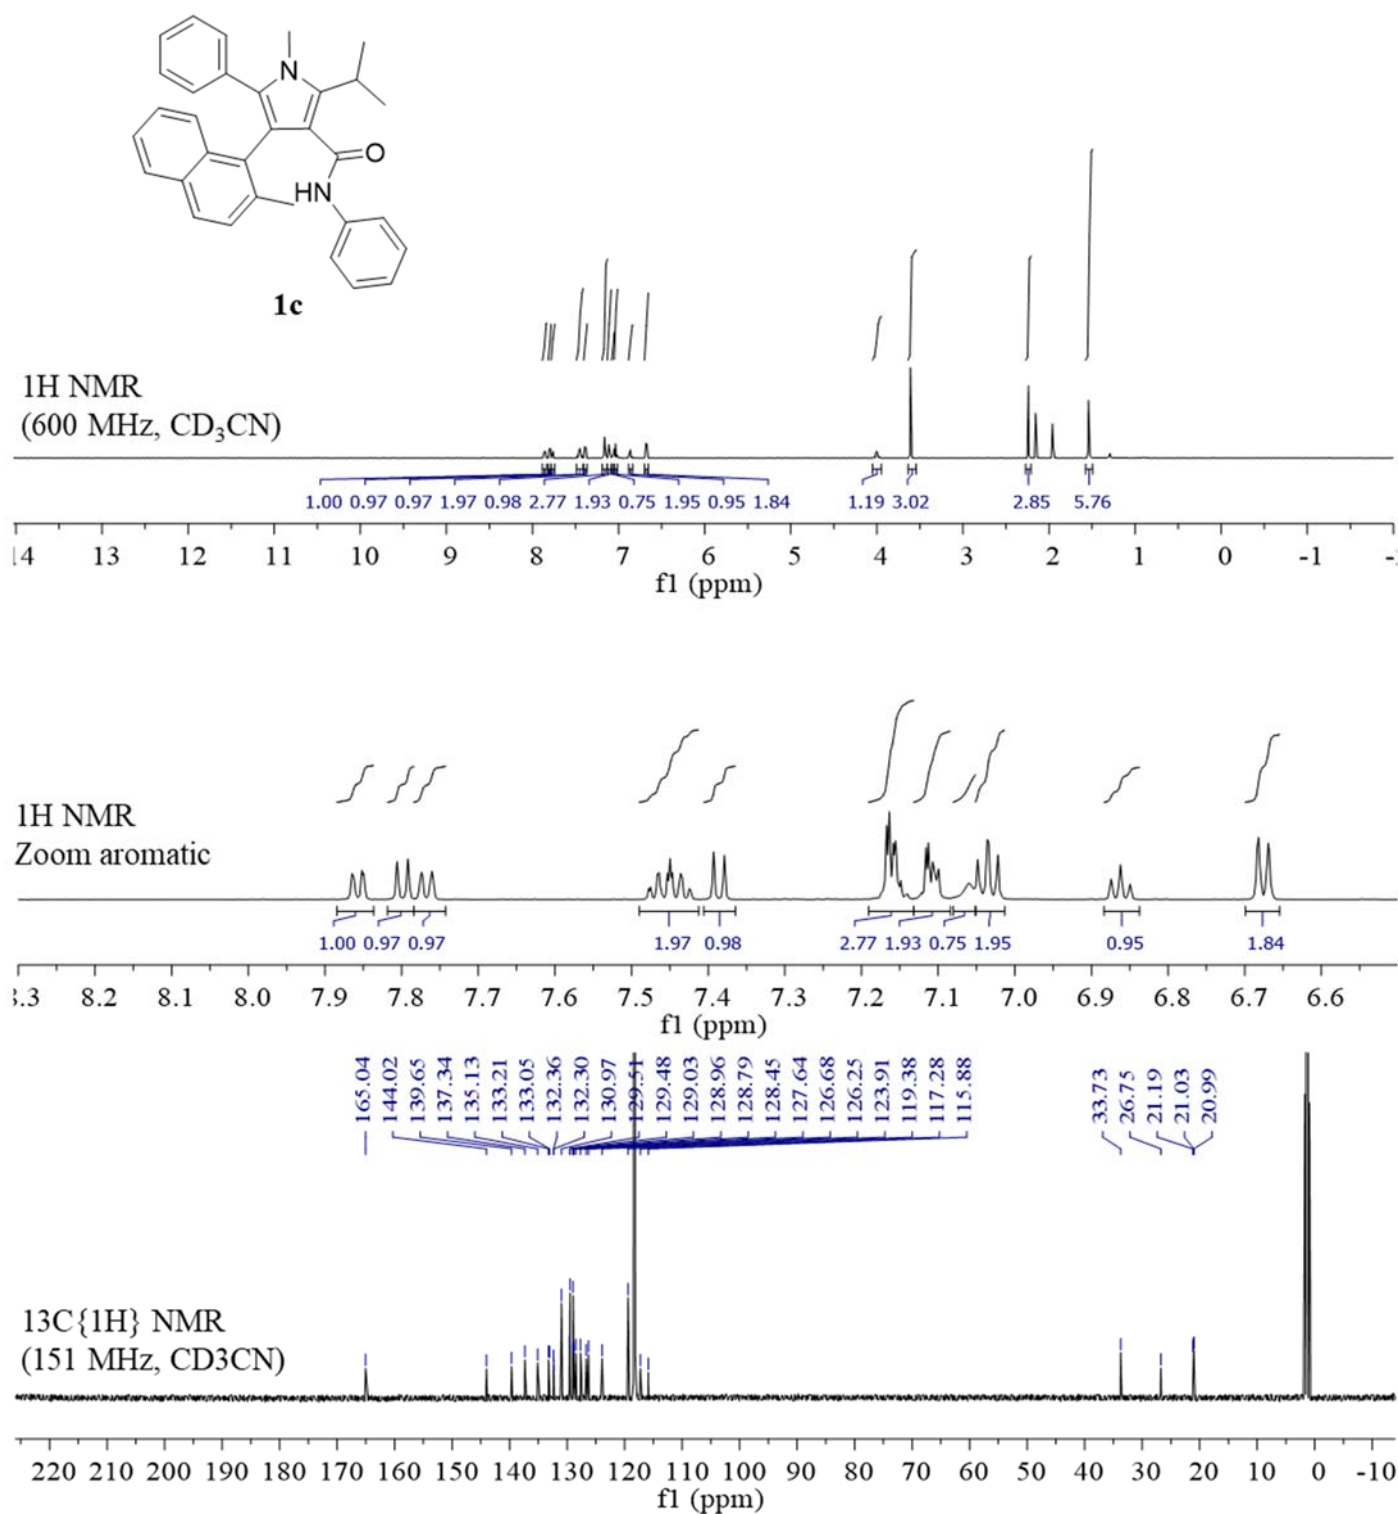

**Figure S39.** NMR spectra of **1c** in CD<sub>3</sub>CN.

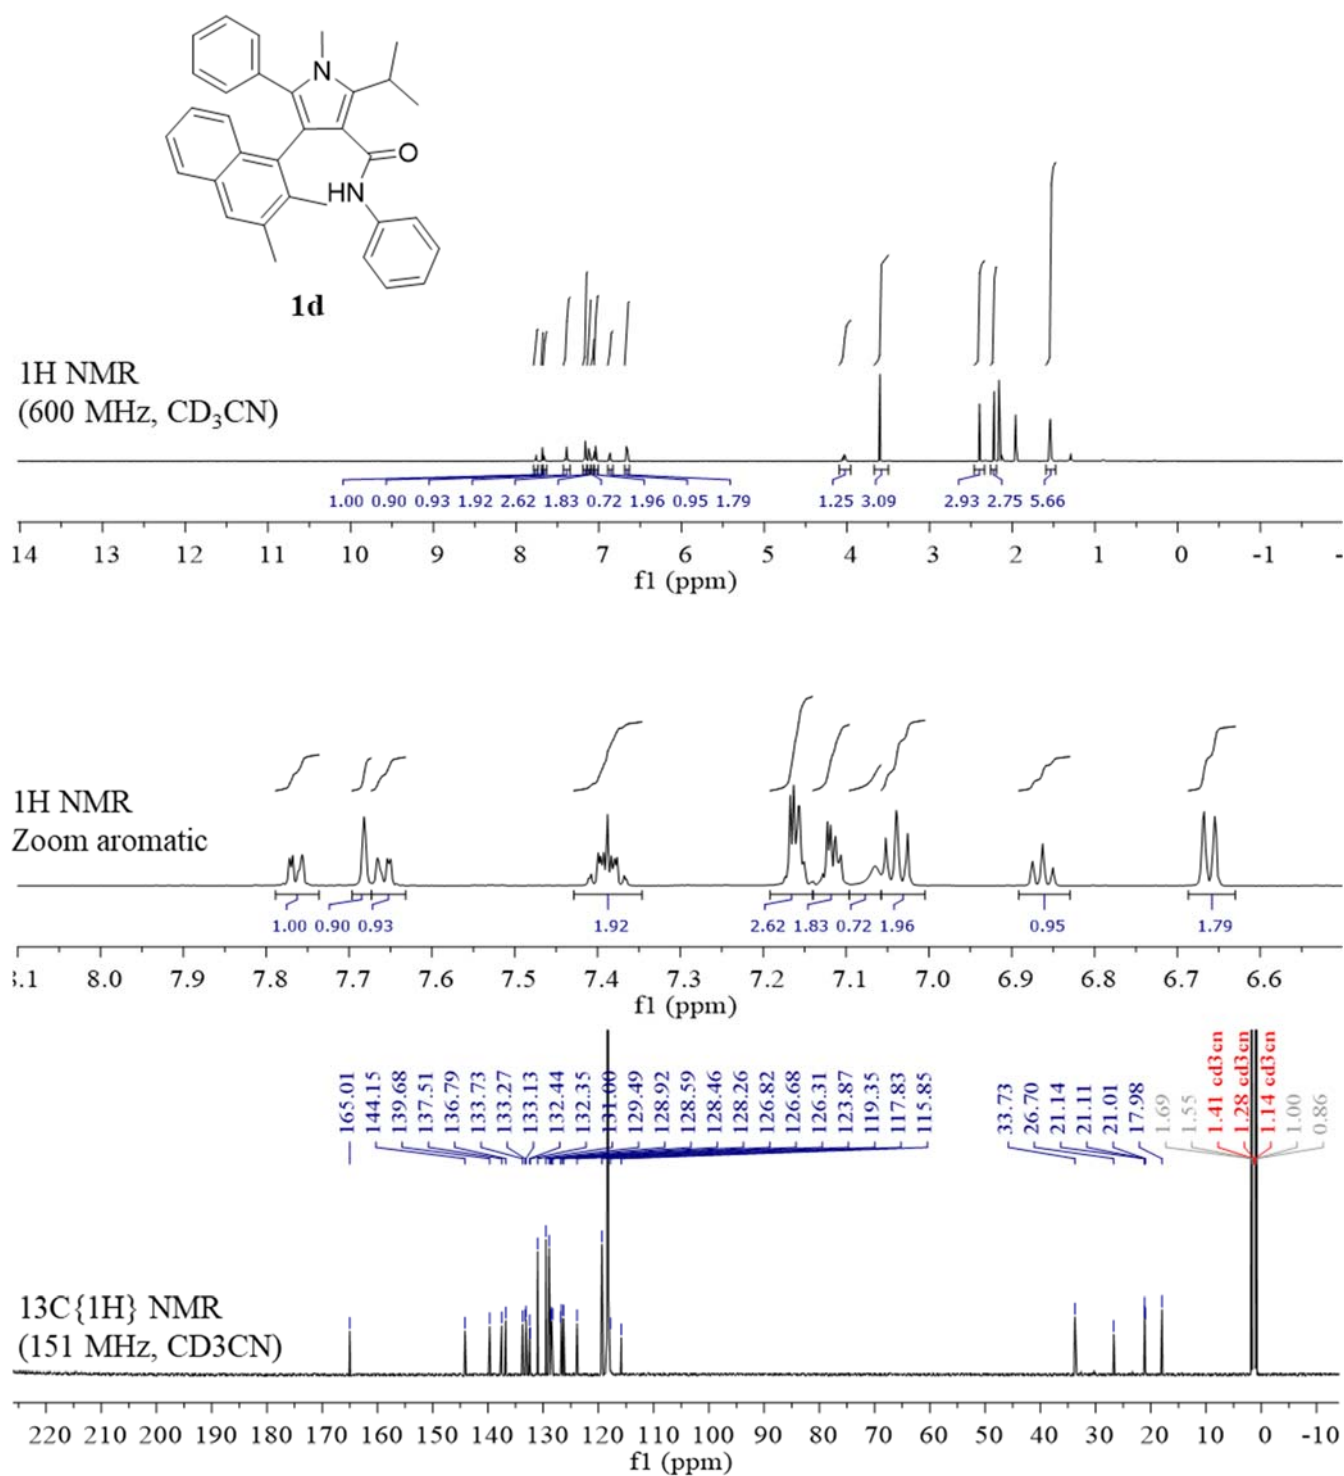

**Figure S40.** NMR spectra of **1d** in CD<sub>3</sub>CN.

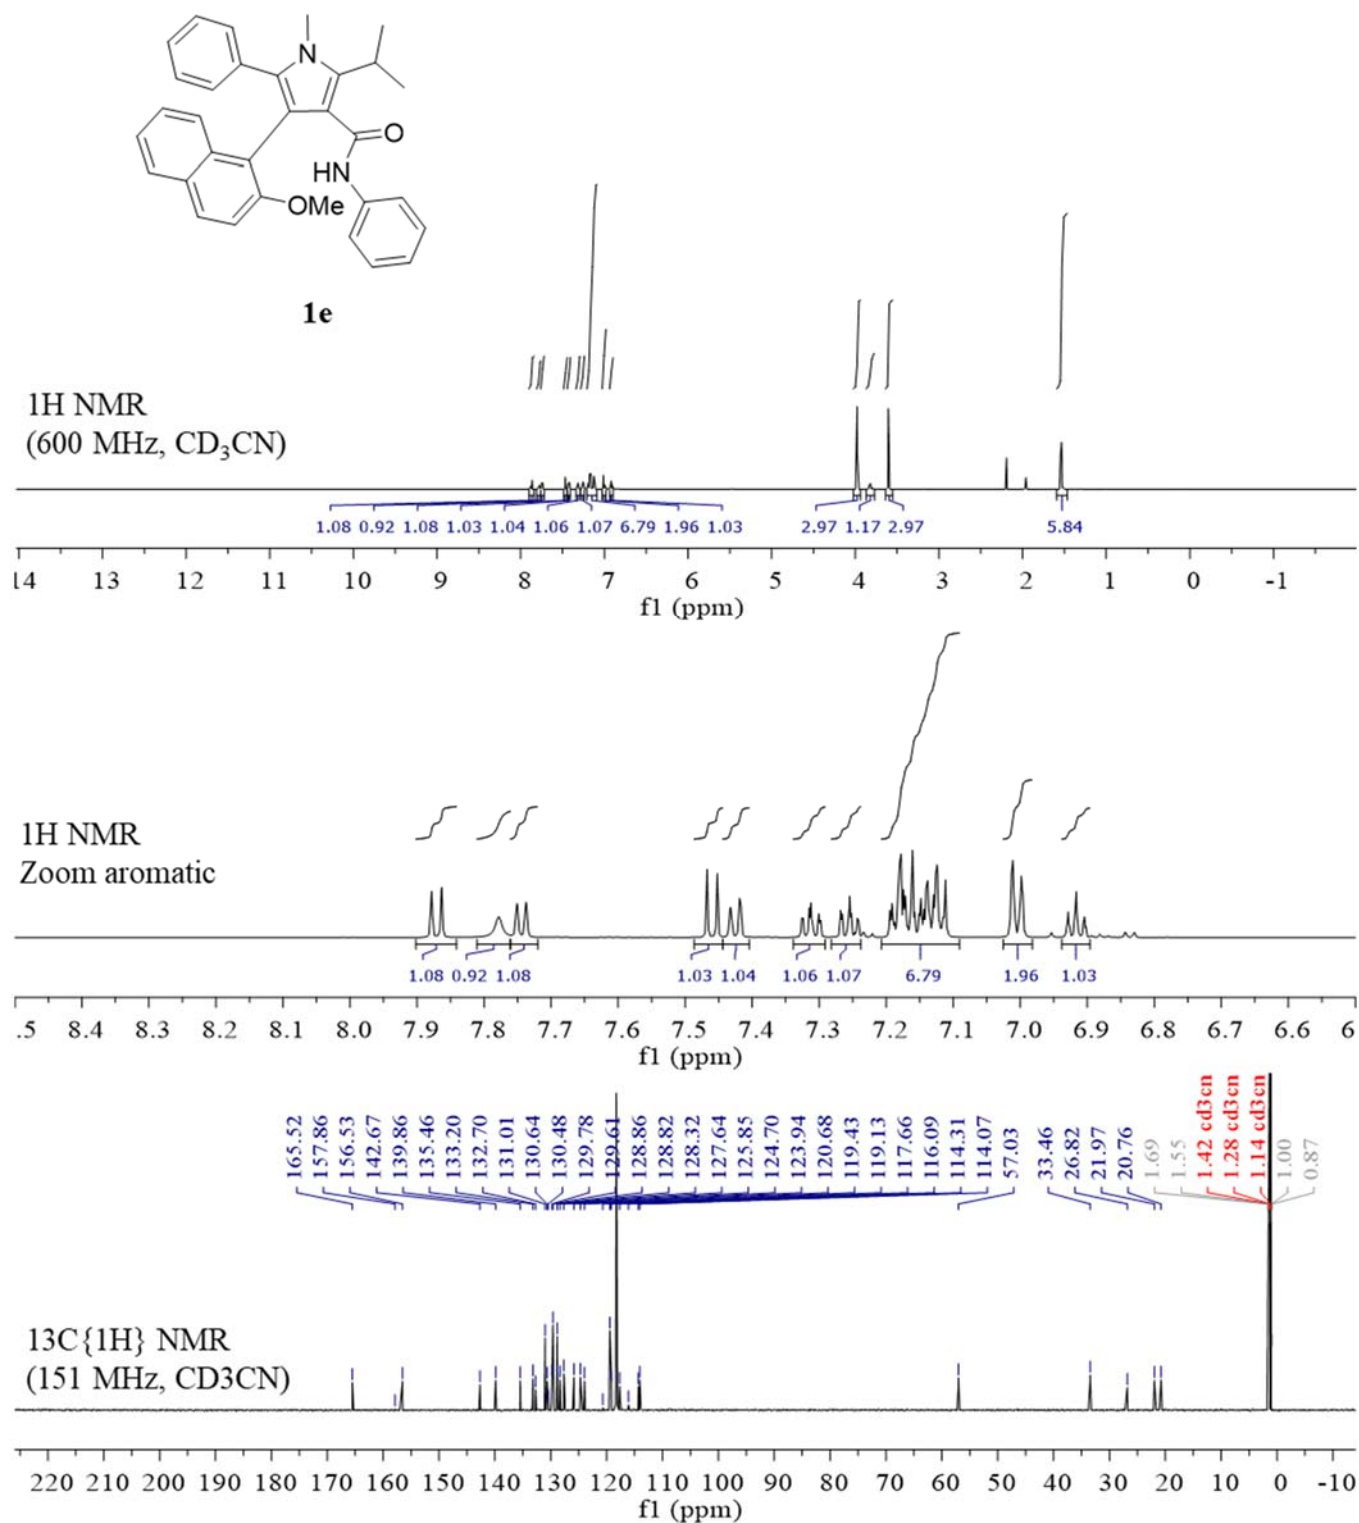

**Figure S41.** NMR spectra of **1e** in CD<sub>3</sub>CN.



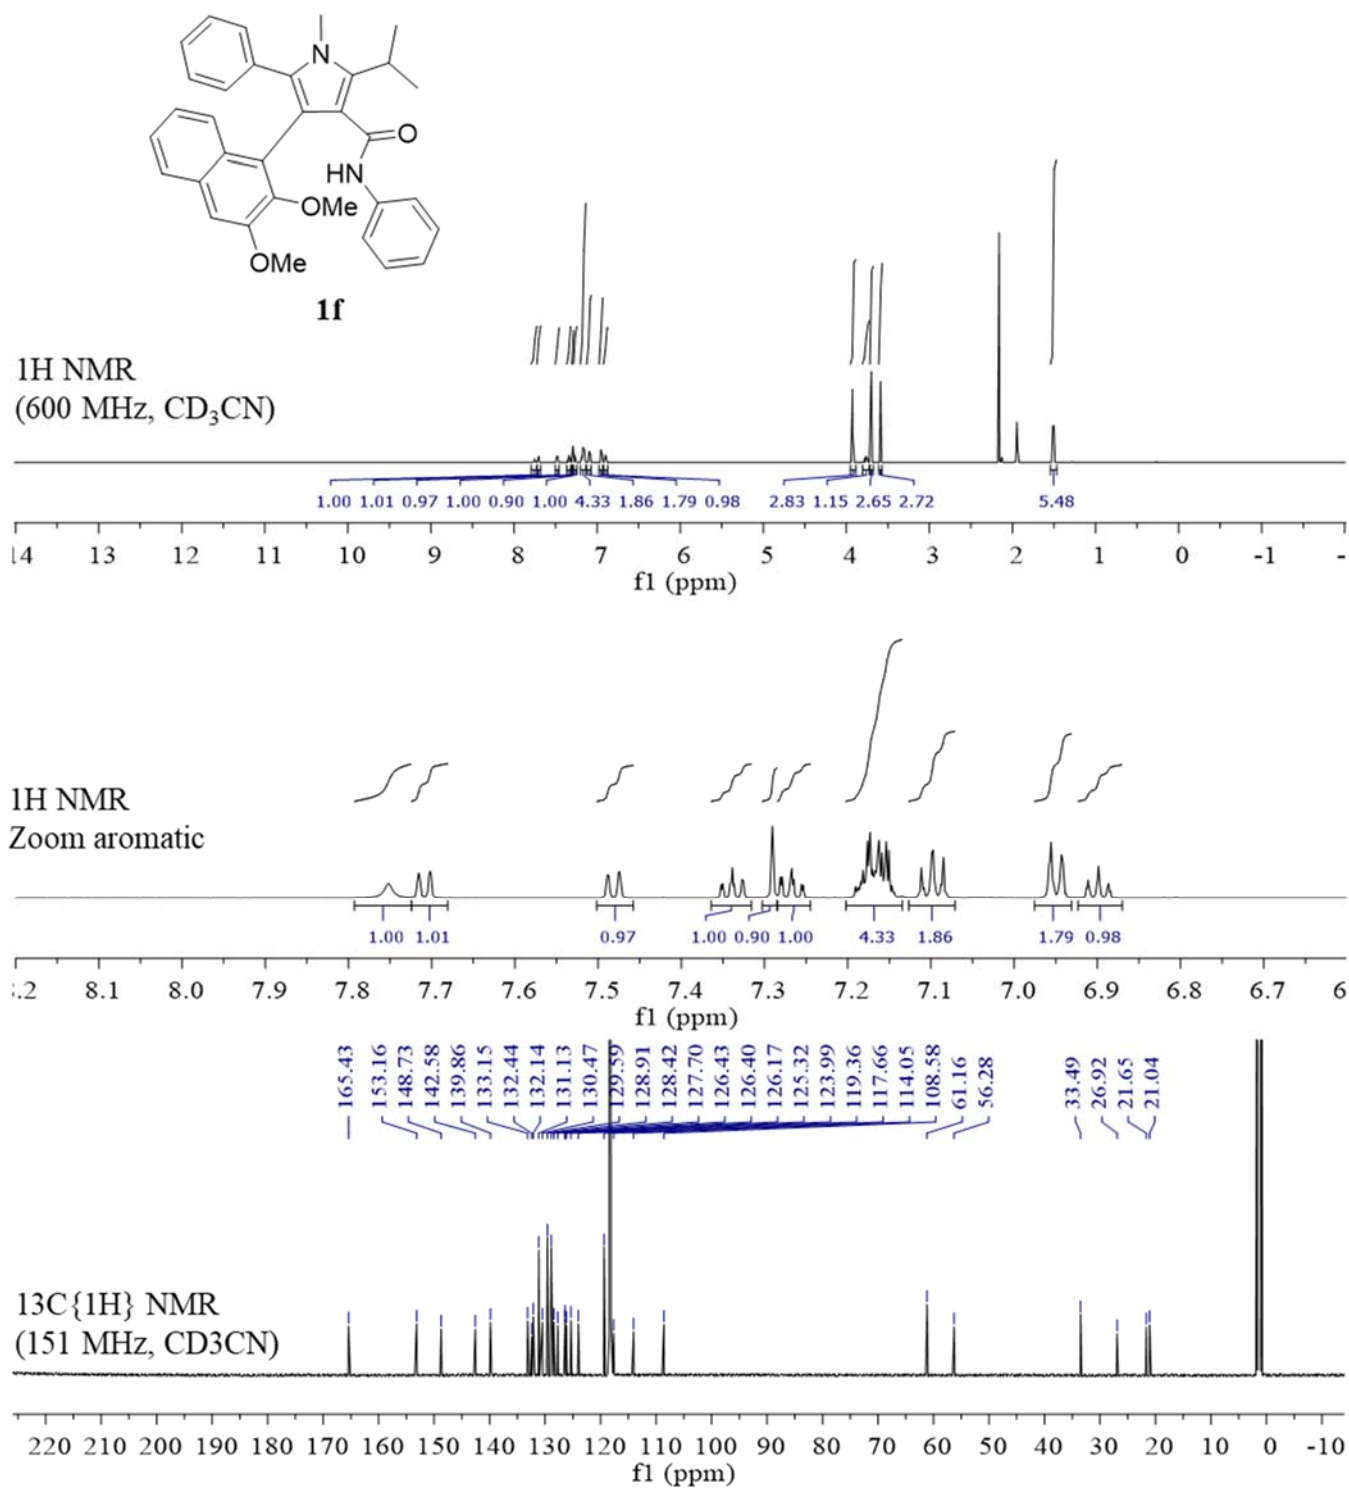

**Figure S42.** NMR spectra of **1f** in CD<sub>3</sub>CN.

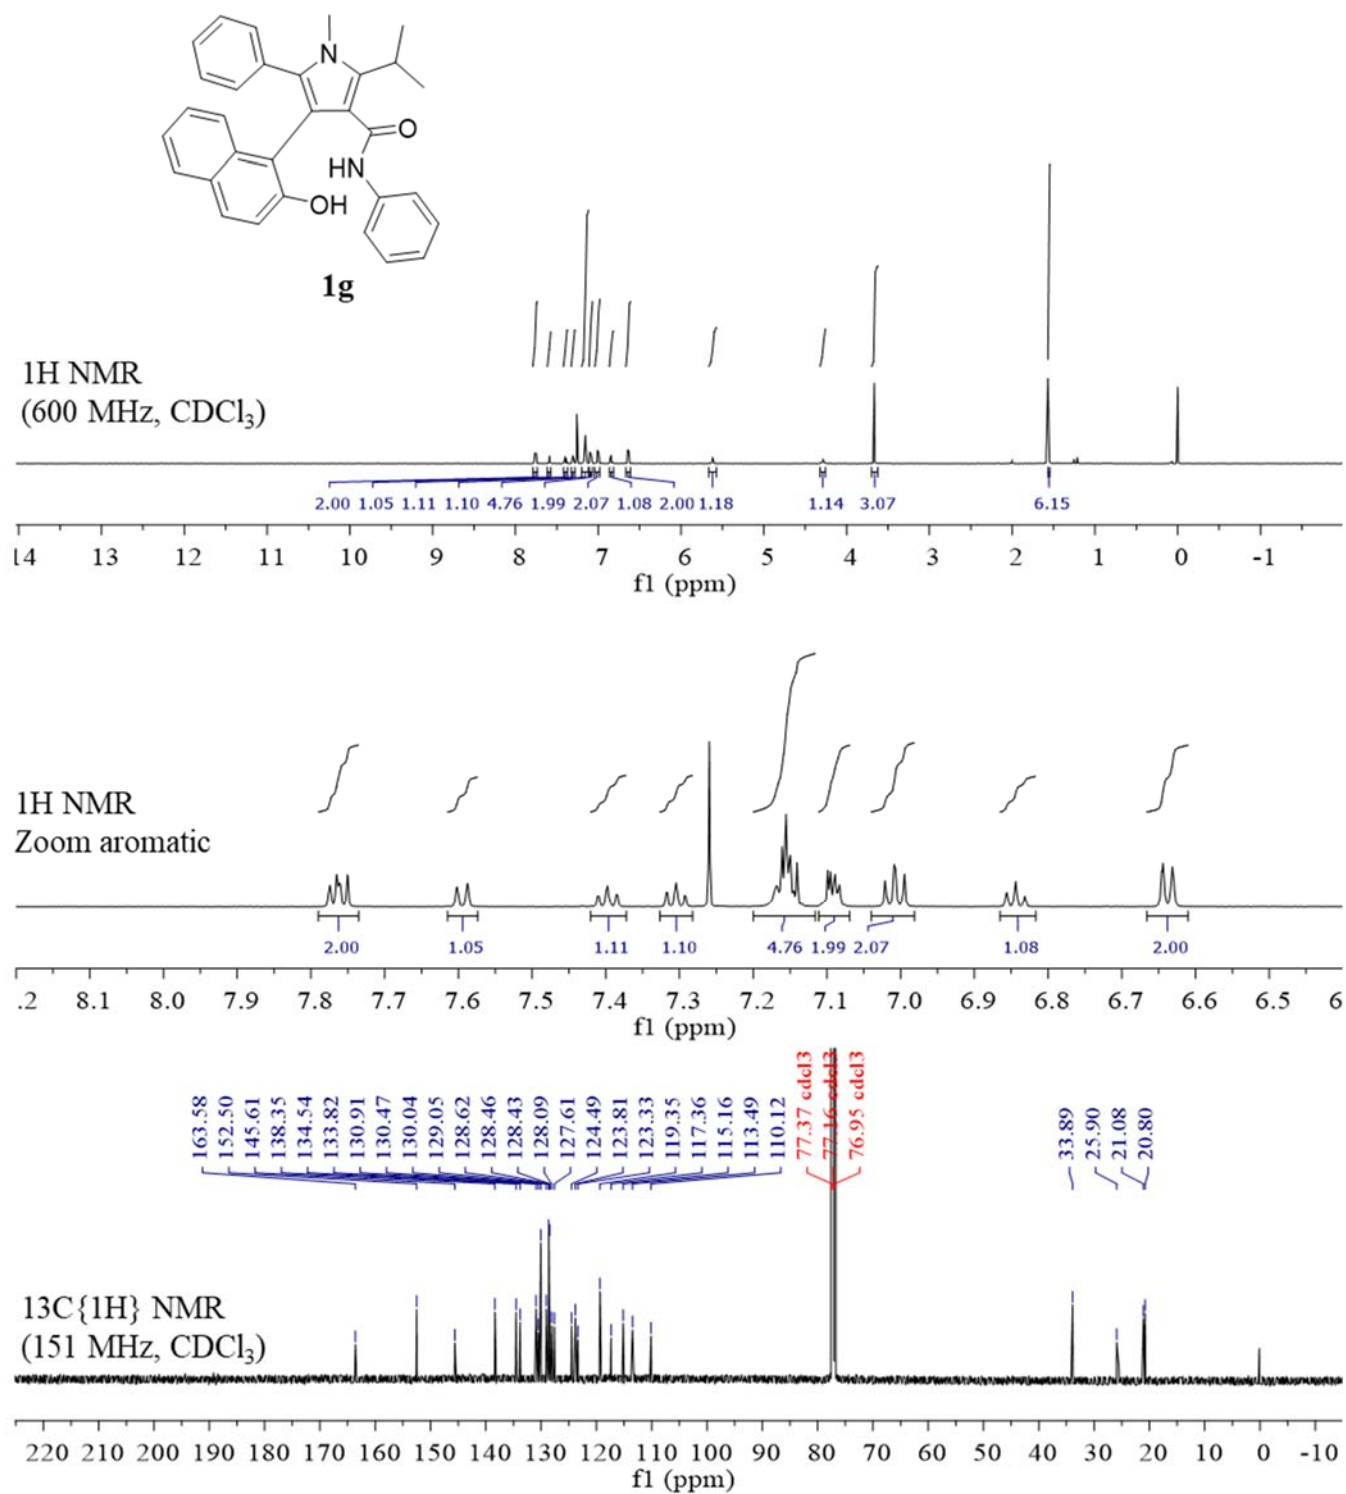

**Figure S43.** NMR spectra of **1g** in CDCl<sub>3</sub>.



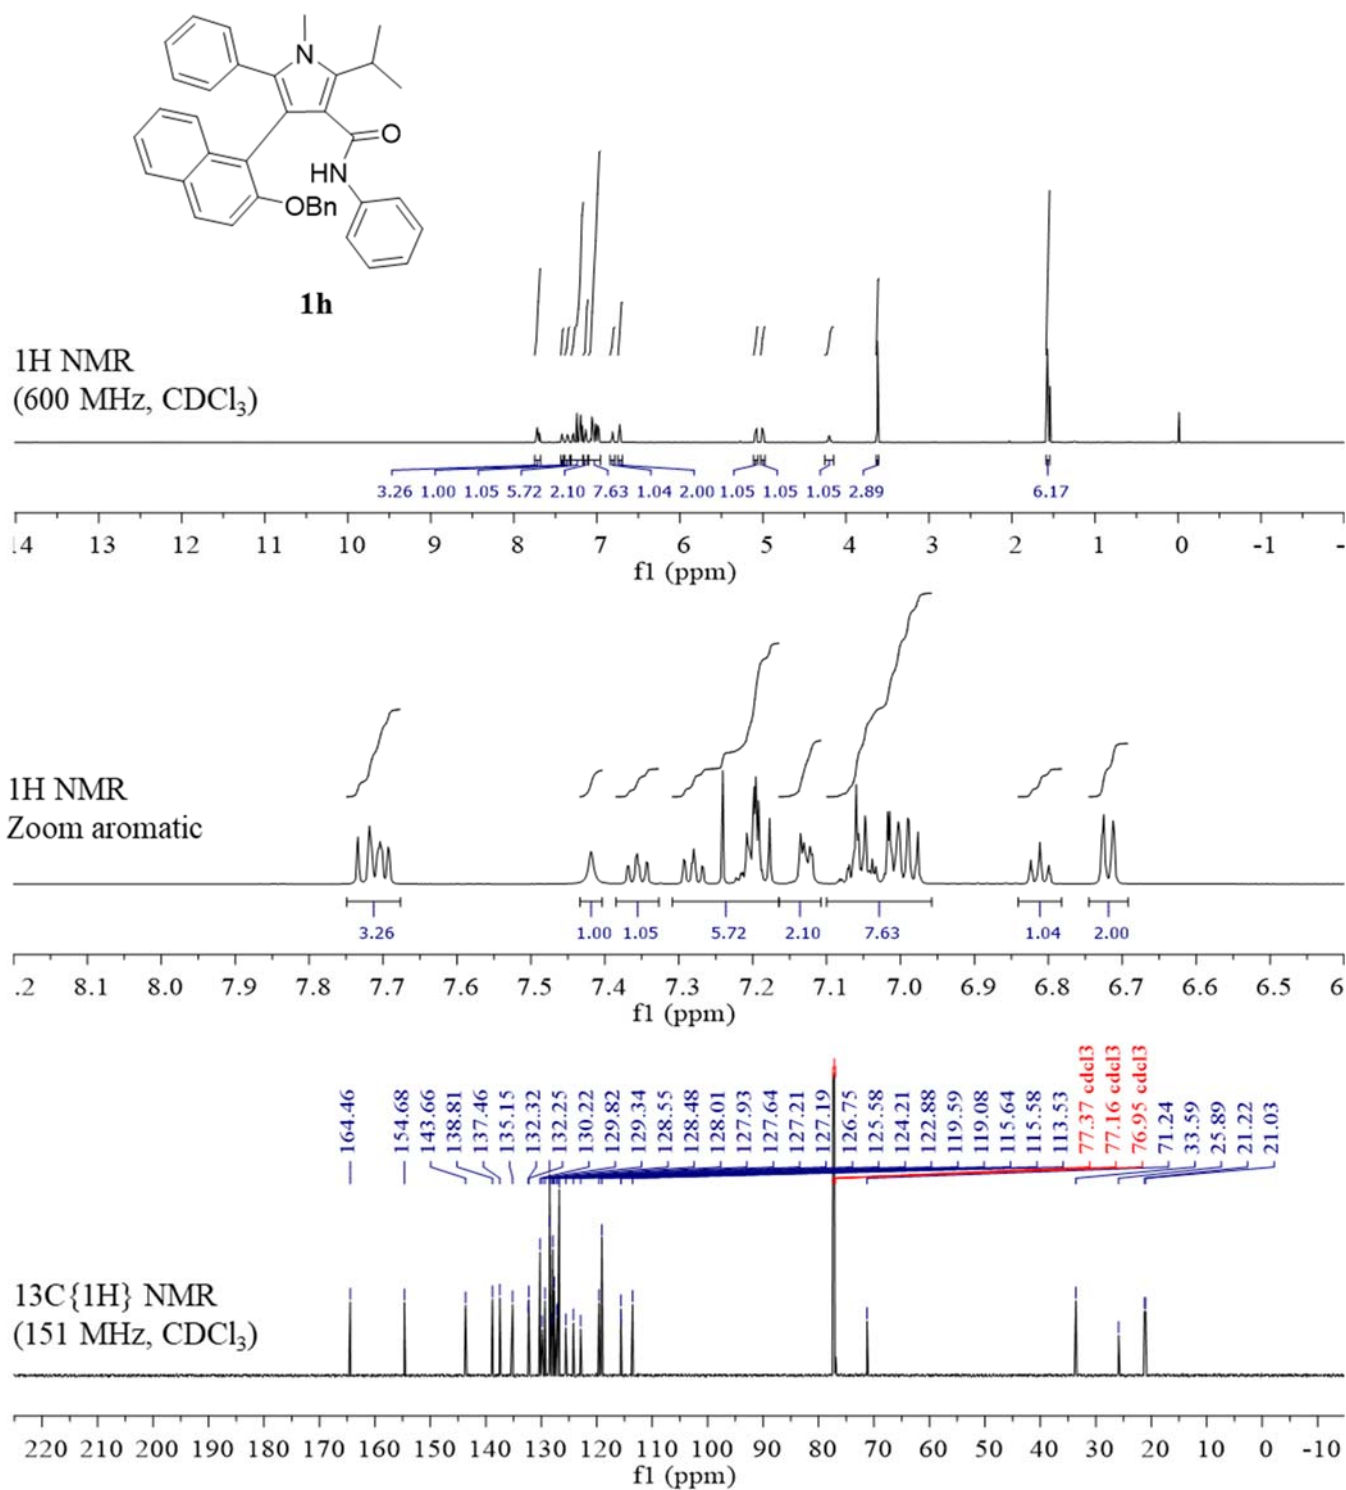

**Figure S44.** NMR spectra of **1h** in CDCl<sub>3</sub>.

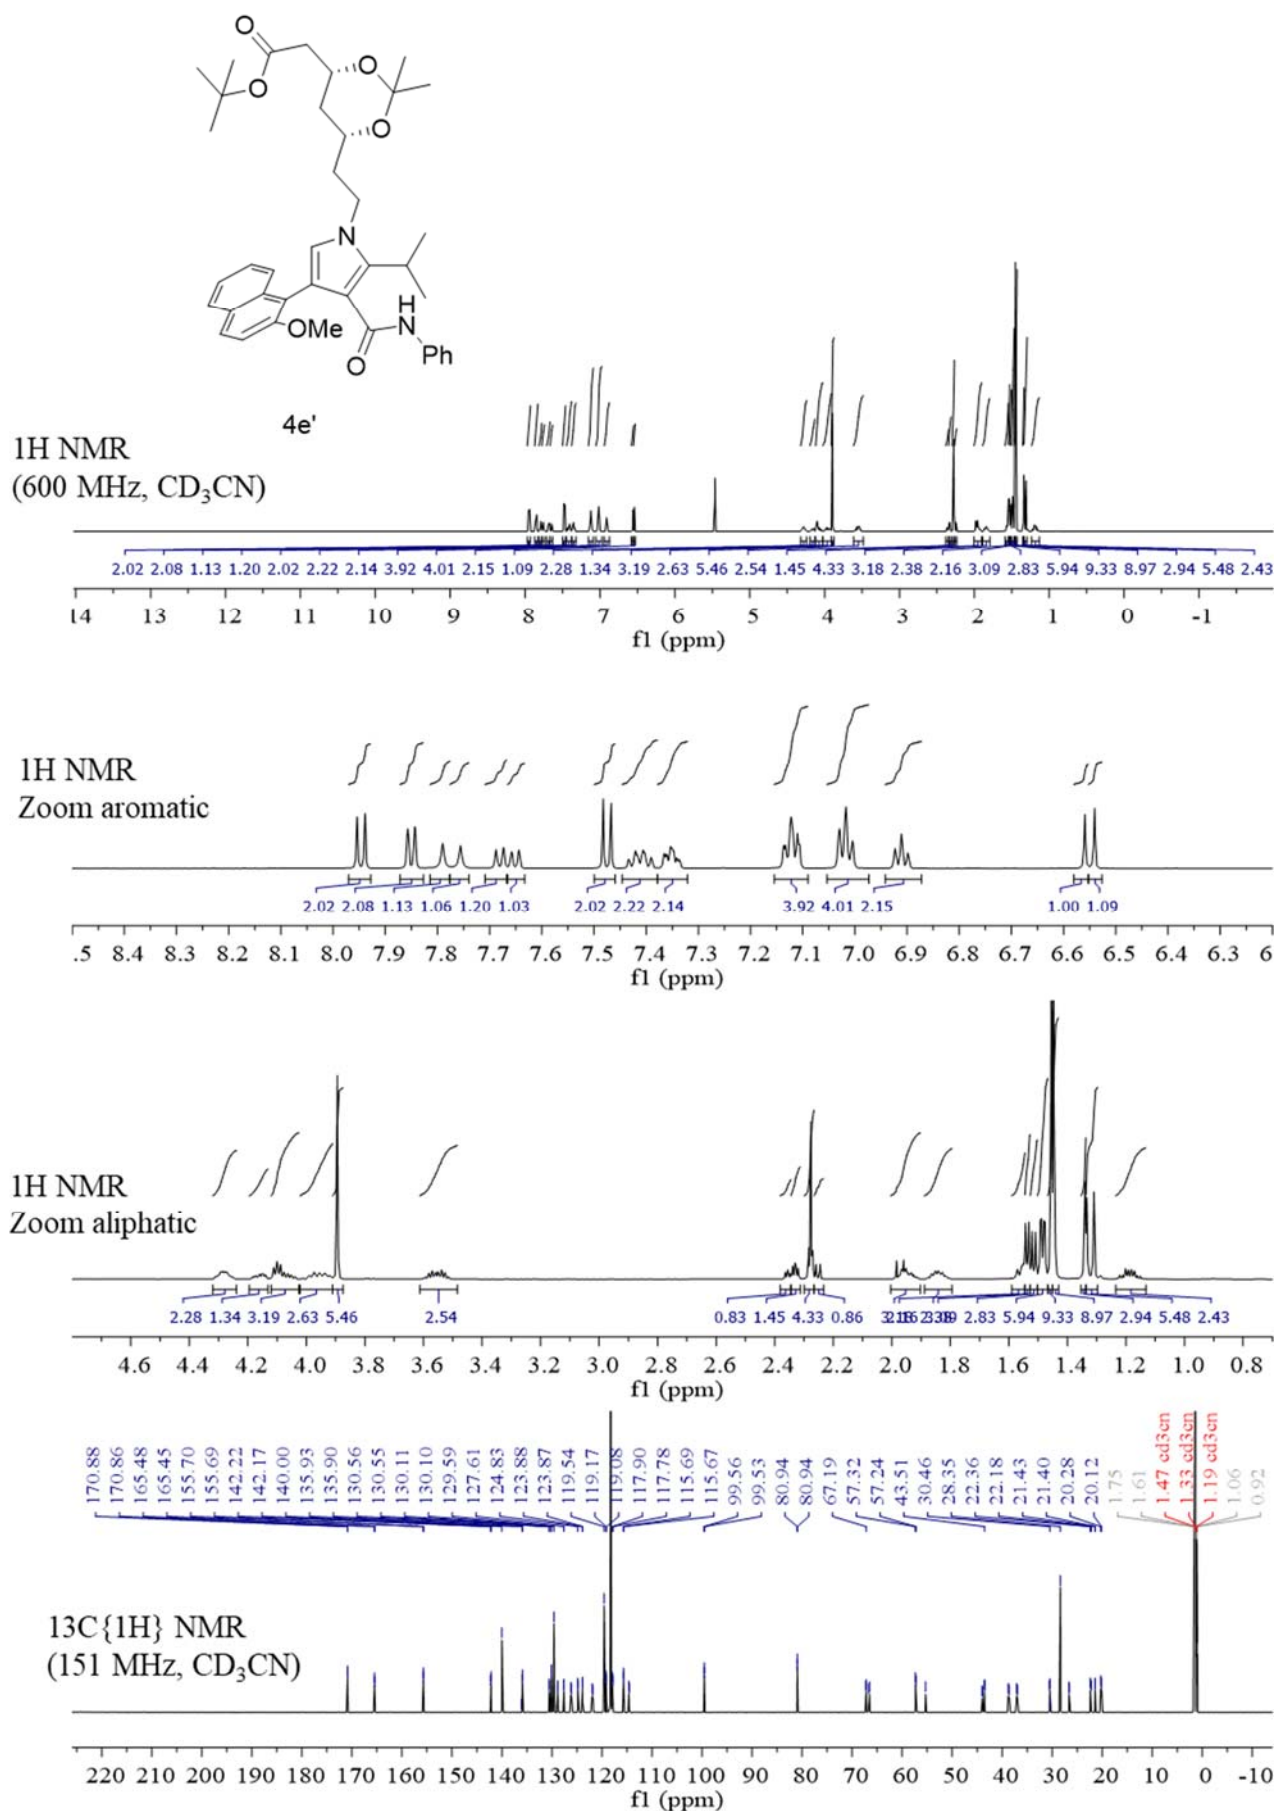

Figure S45. NMR spectra of **4e'** in CD<sub>3</sub>CN.

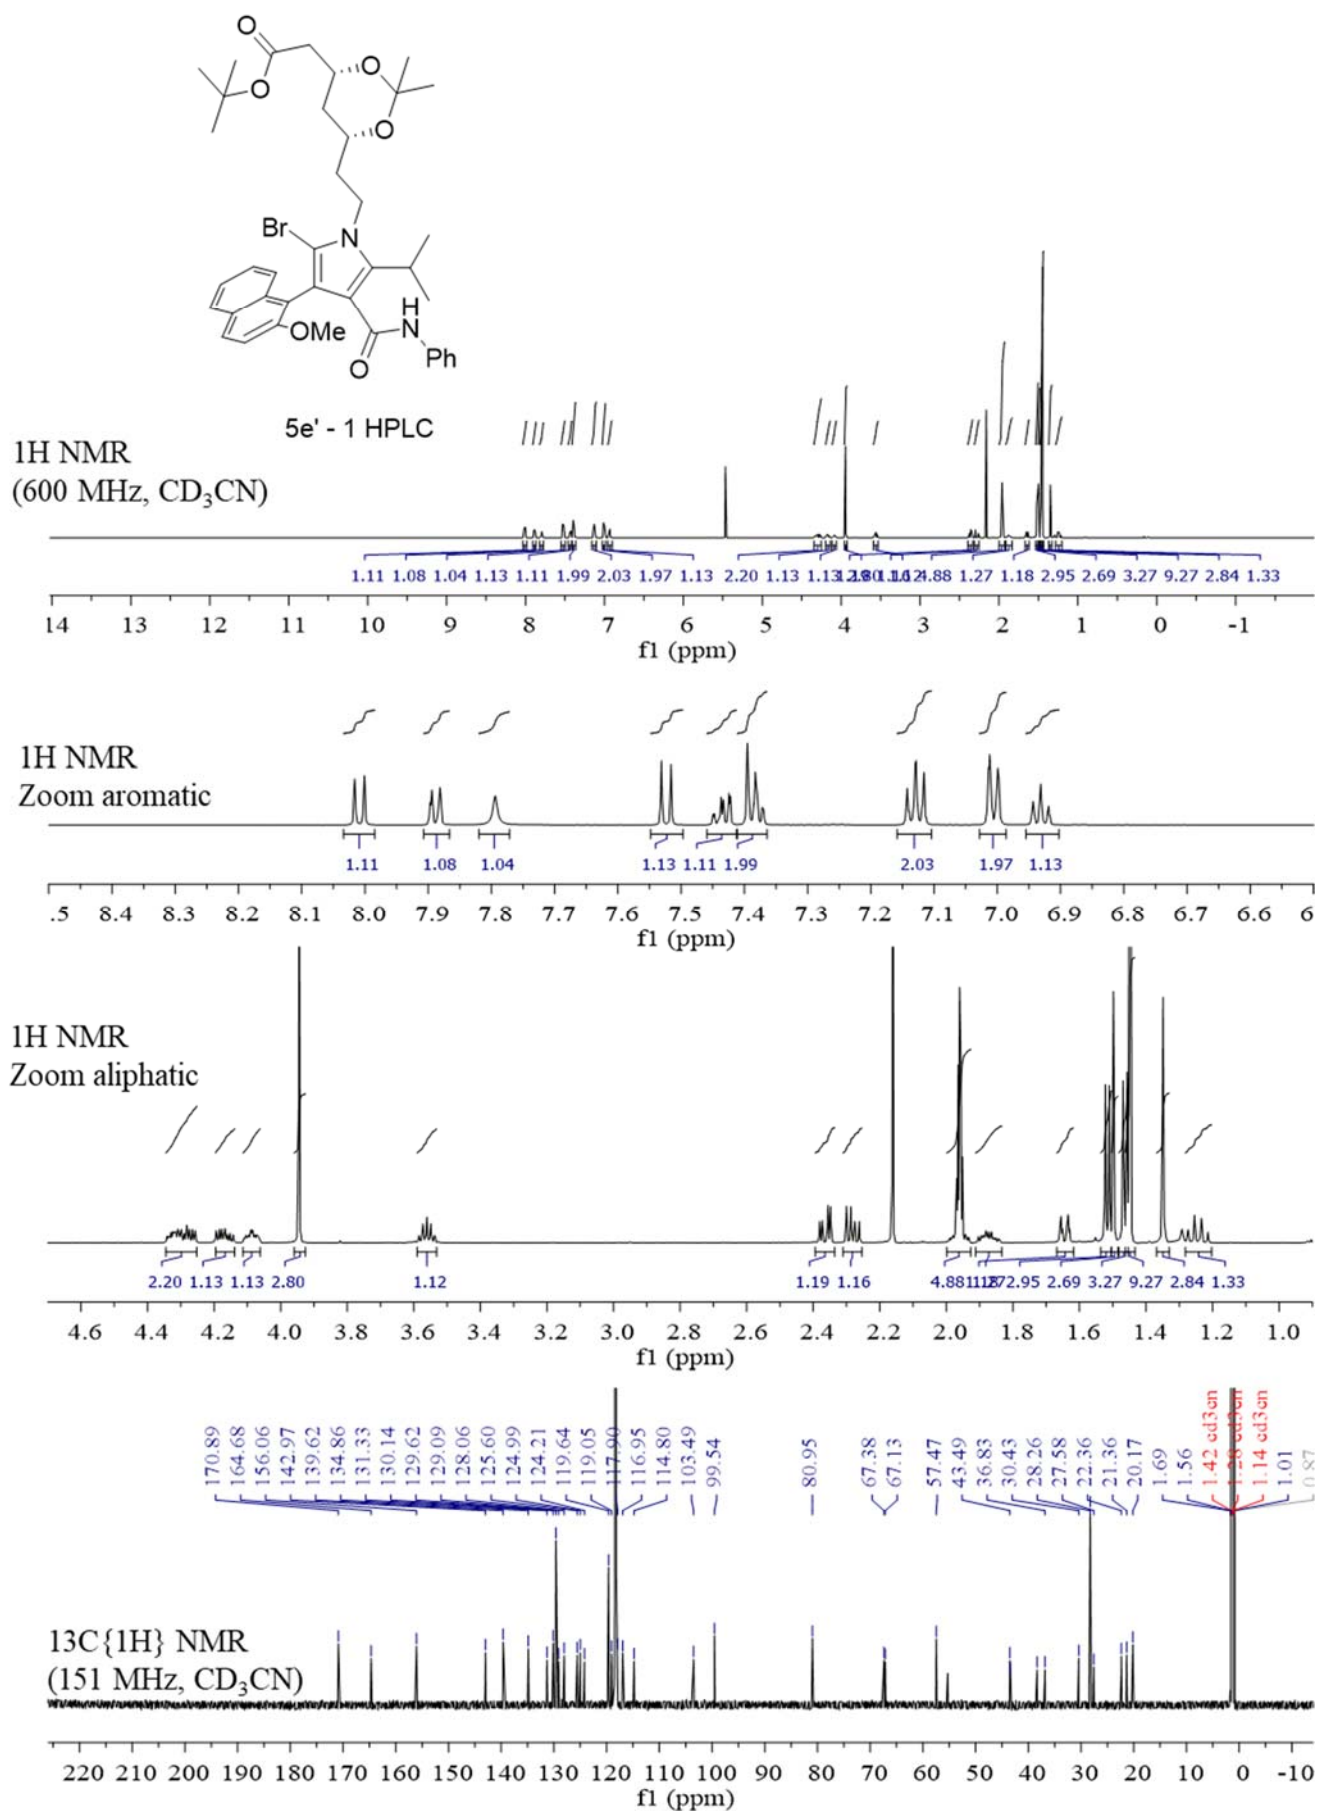

Figure S46. NMR spectra of **5e'** first eluted diastereoisomer in CD<sub>3</sub>CN.

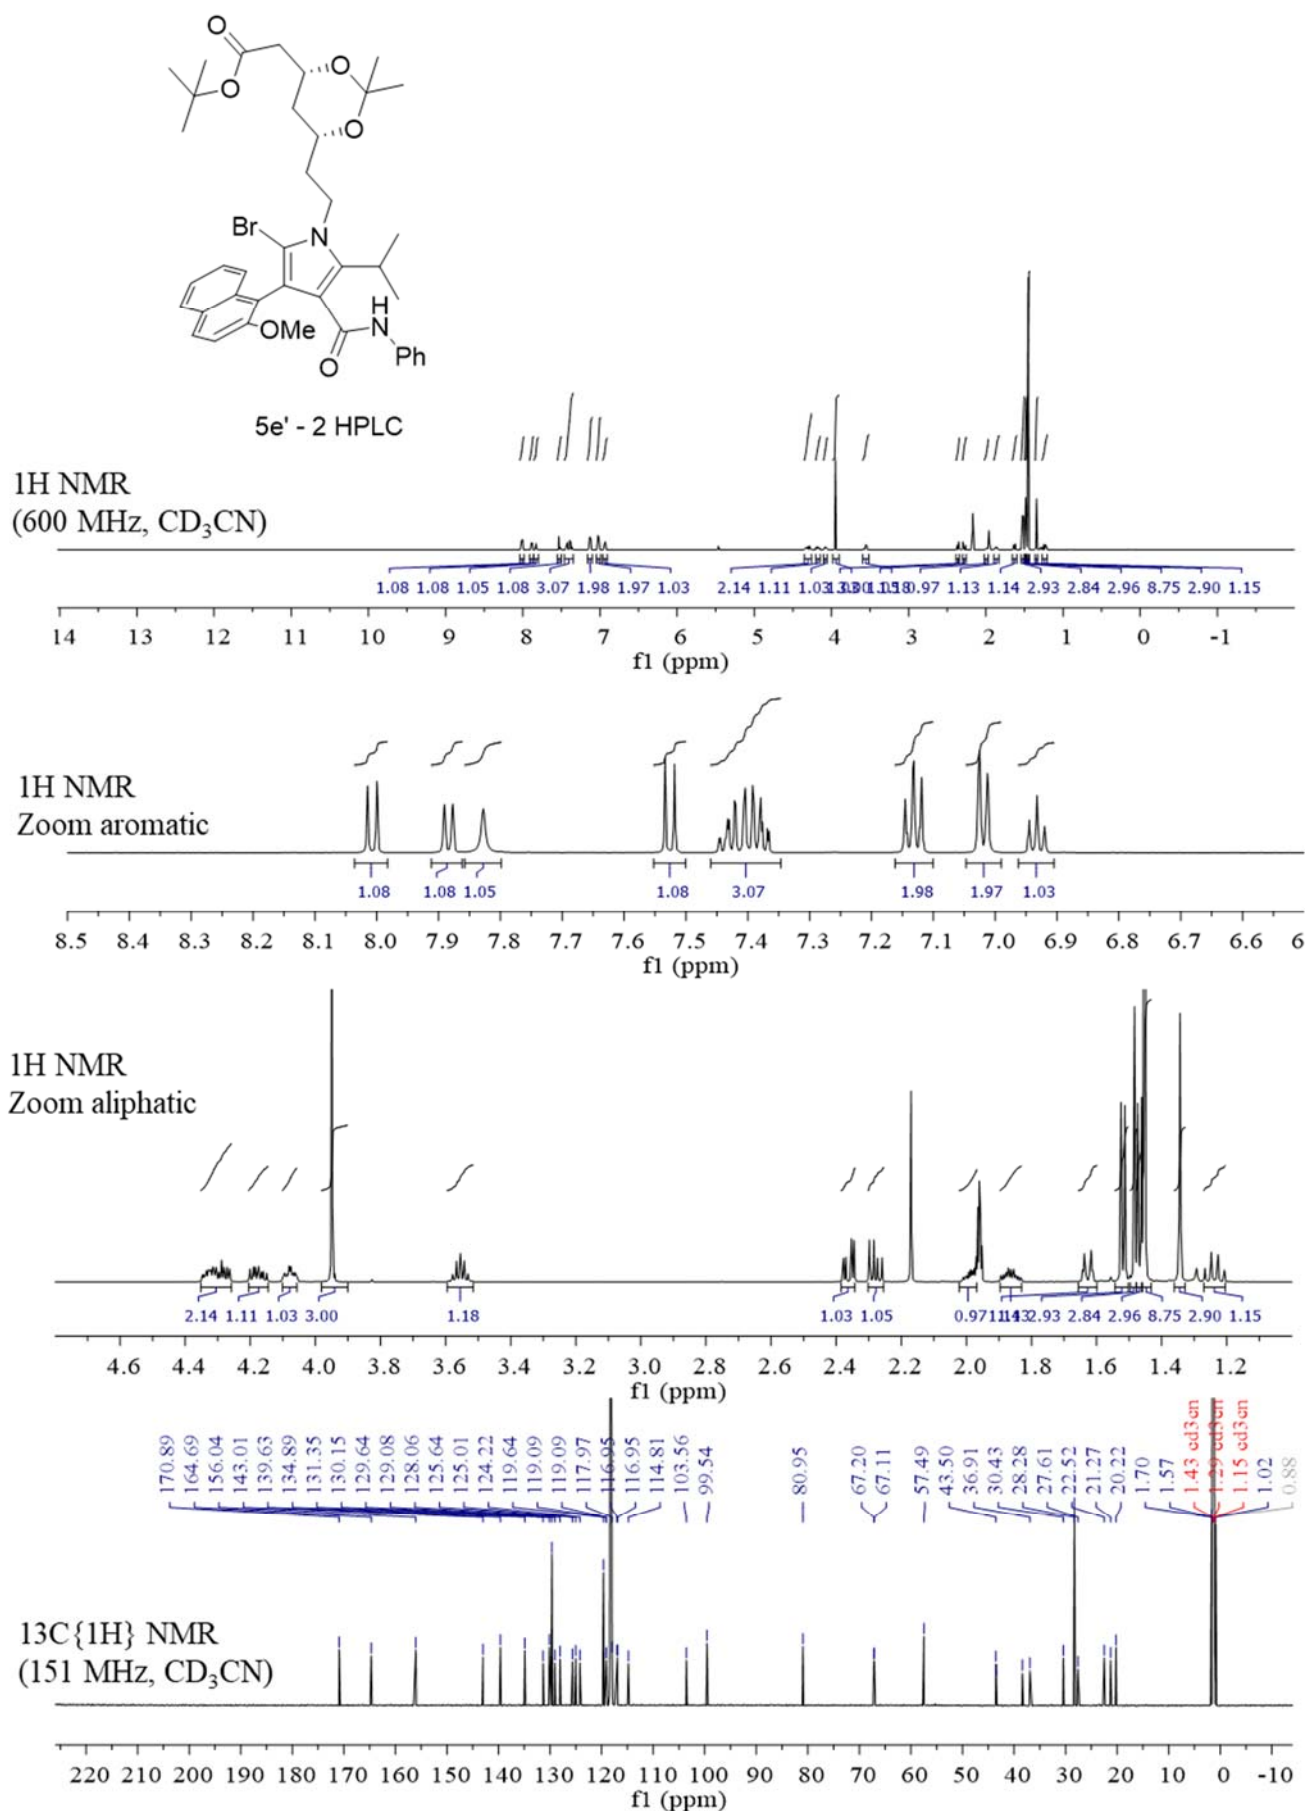

**Figure S47.** NMR spectra of **5e'** second eluted diastereoisomer in CD<sub>3</sub>CN.

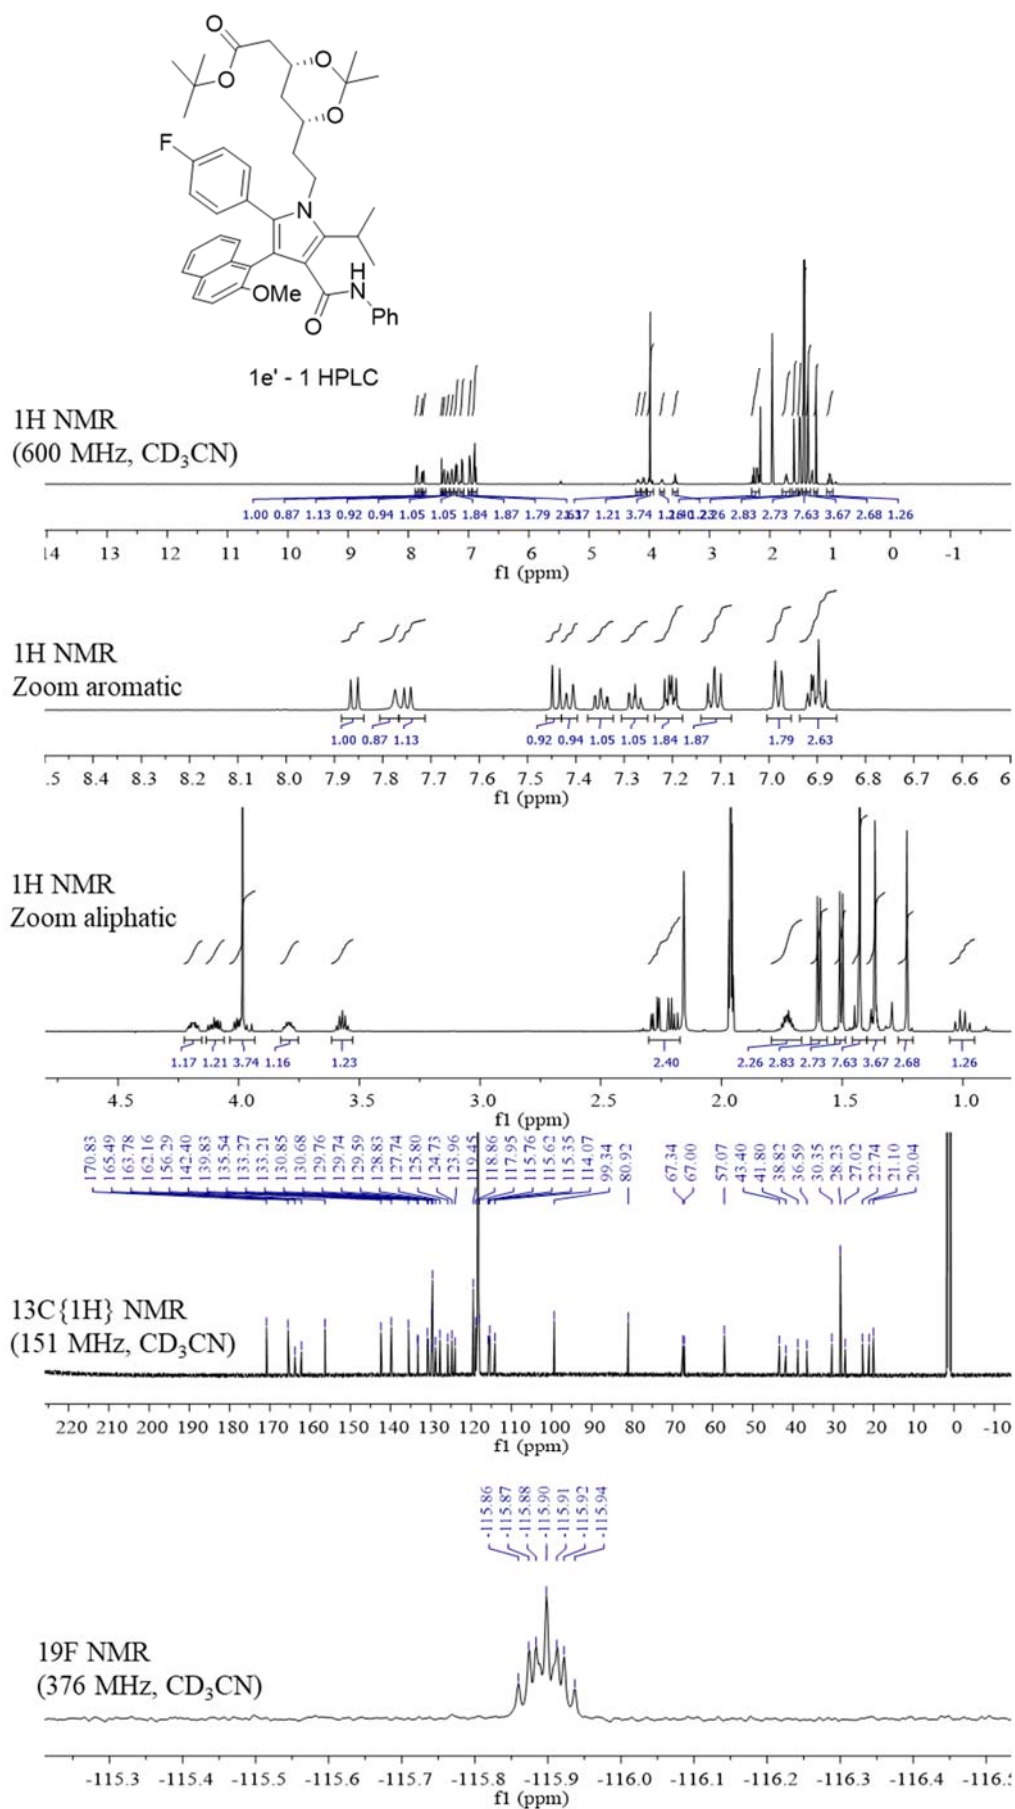

**Figure S48.** NMR spectra of **1e'** first eluted diastereoisomer in CD<sub>3</sub>CN.



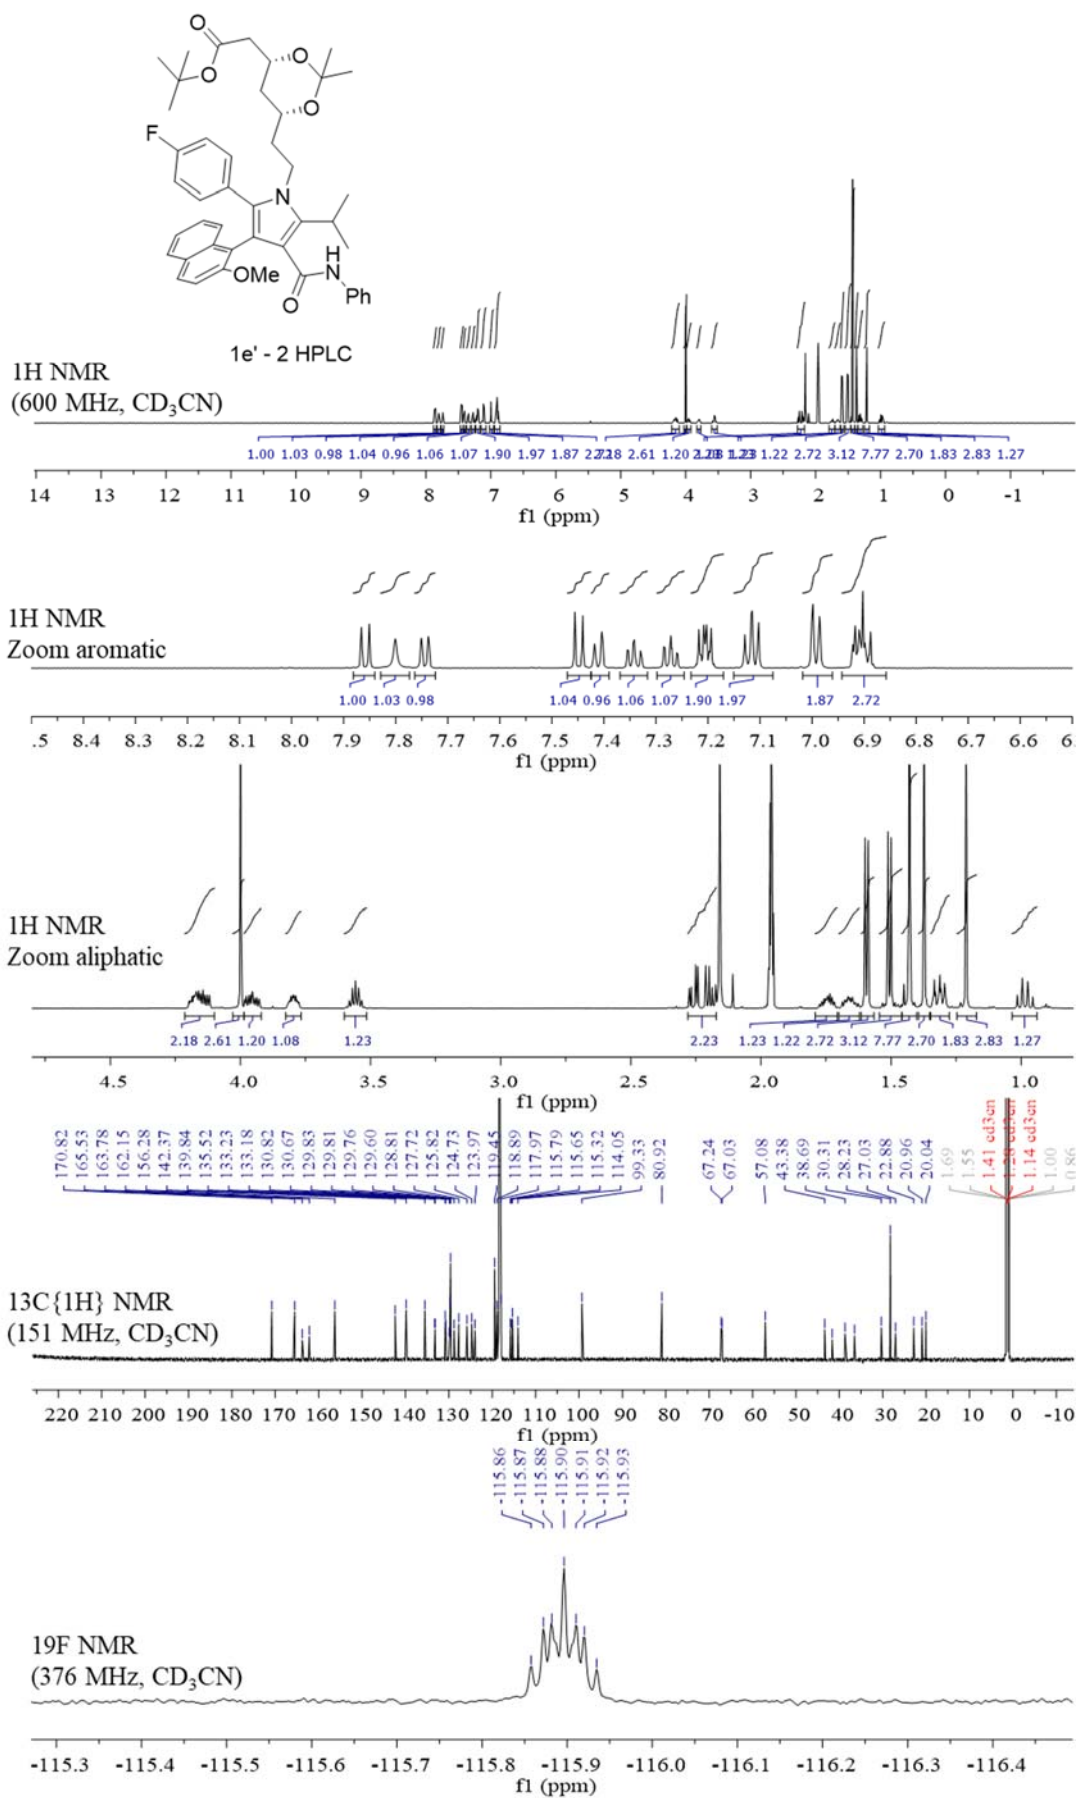

**Figure S49.** NMR spectra of **1e'** second eluted diastereoisomer in CD<sub>3</sub>CN.

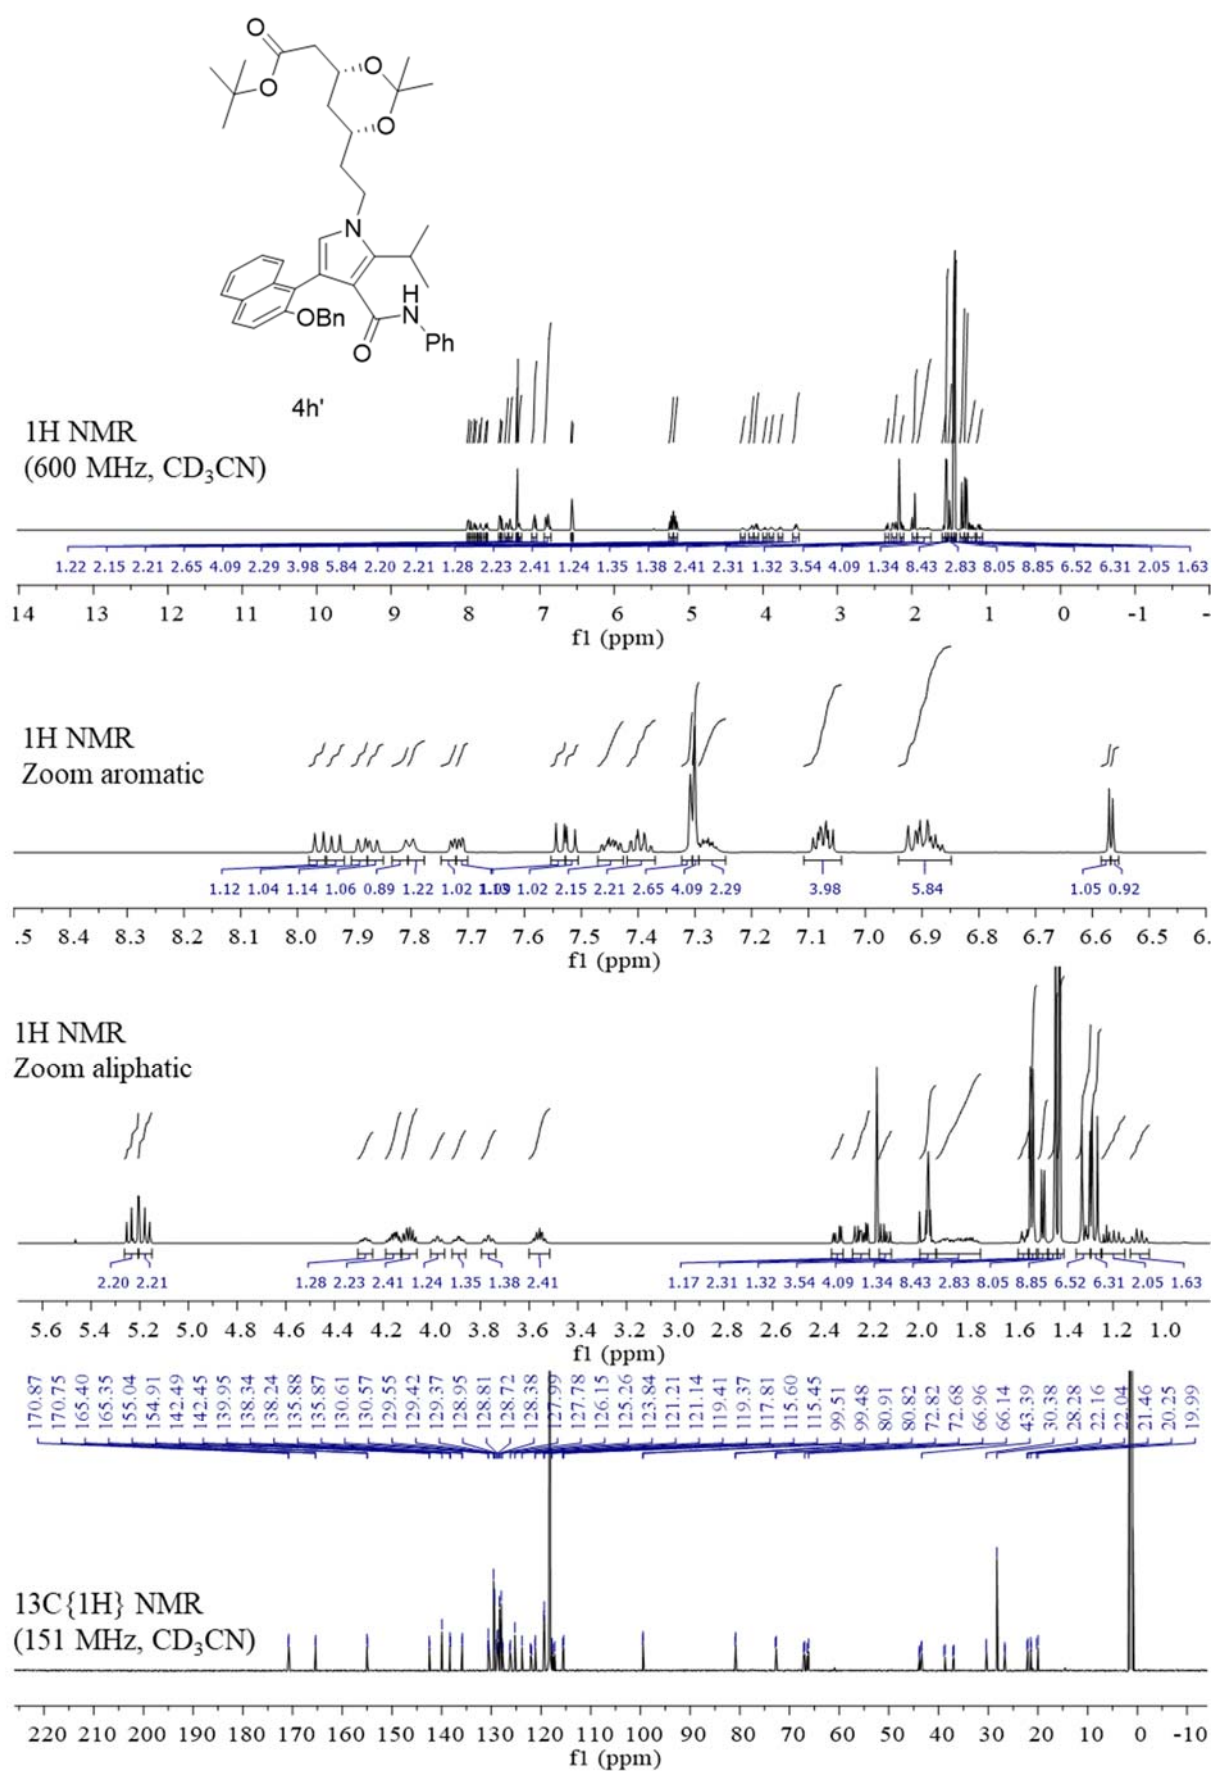

**Figure S50.** NMR spectra of **4h'** in CD<sub>3</sub>CN.

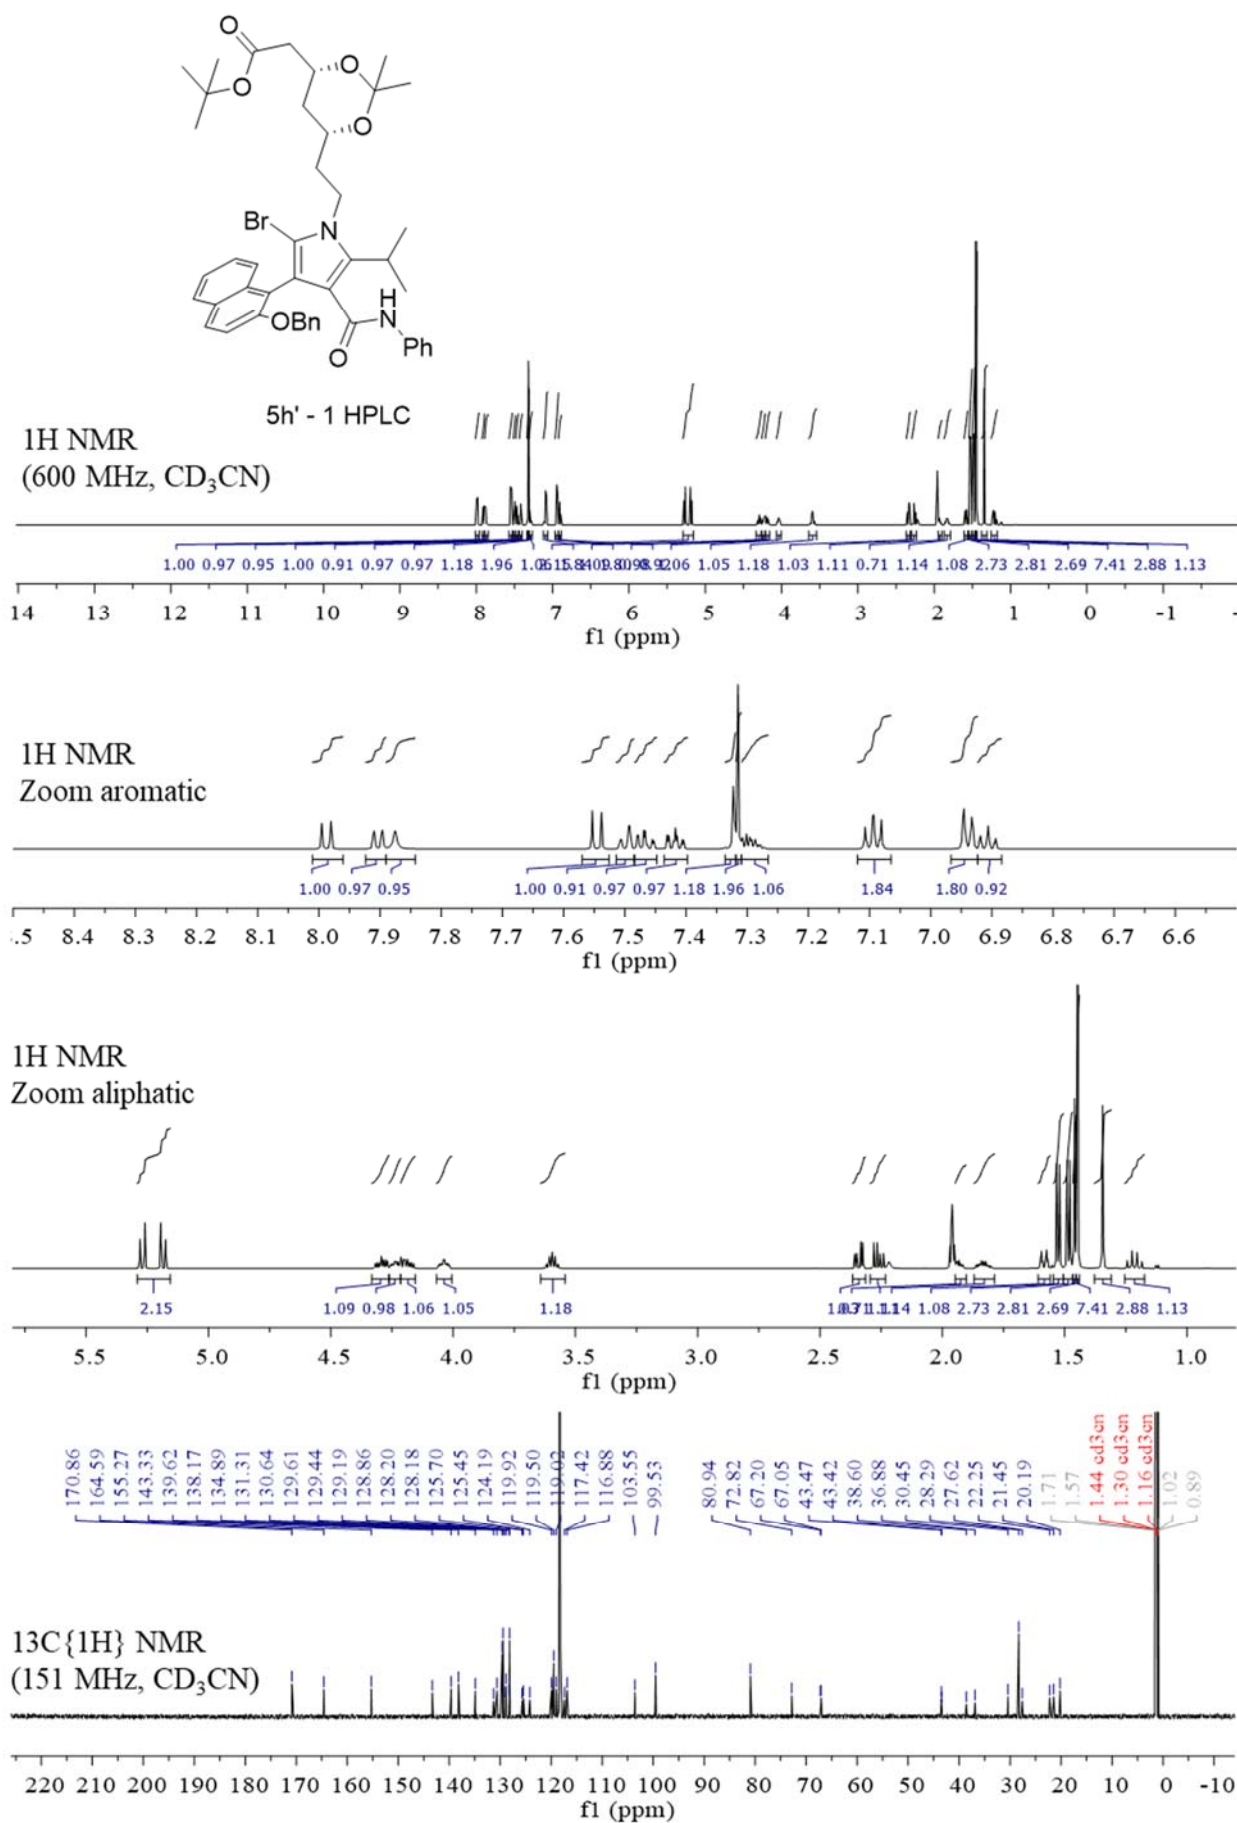

Figure S51. NMR spectra of **5h'** first eluted diastereoisomer in CD<sub>3</sub>CN.



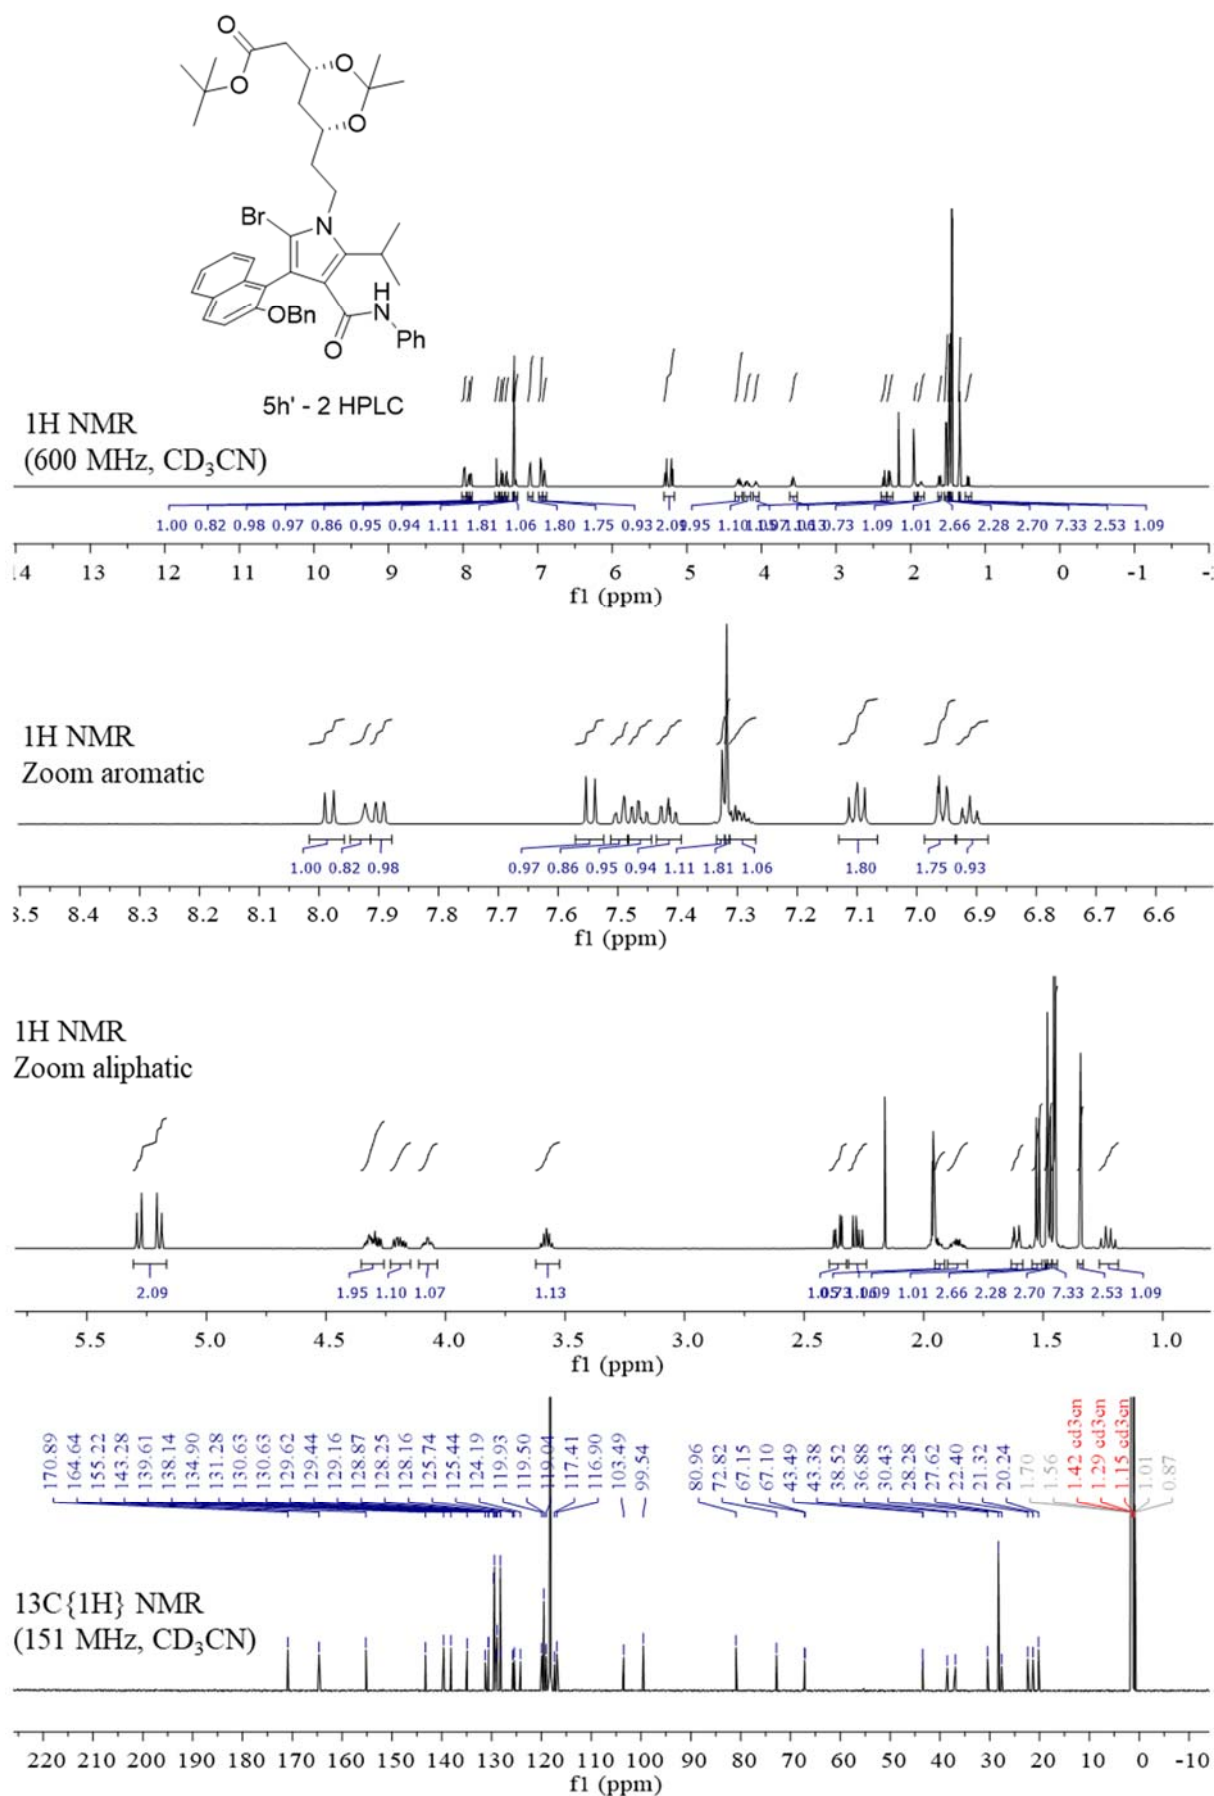

**Figure S52.** NMR spectra of **5h'** second eluted diastereoisomer in CD<sub>3</sub>CN.

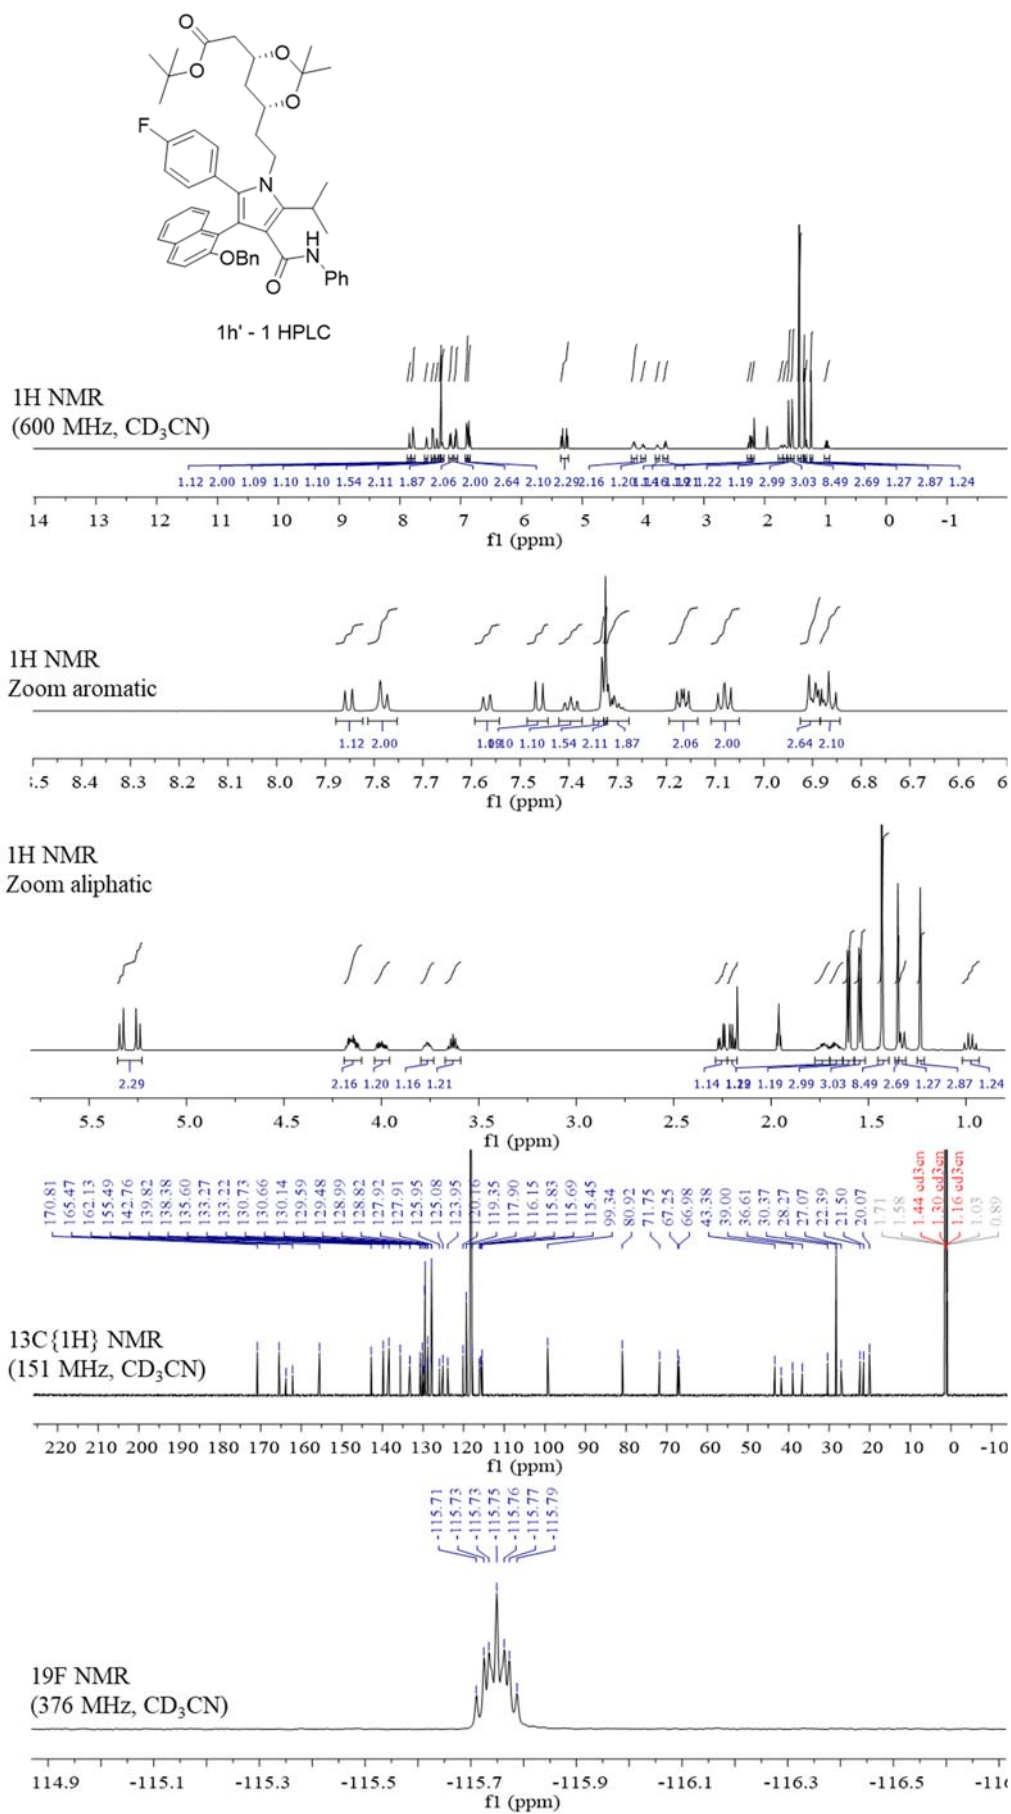

**Figure S53.** NMR spectra of **1h'** first eluted diastereoisomer in CD<sub>3</sub>CN.

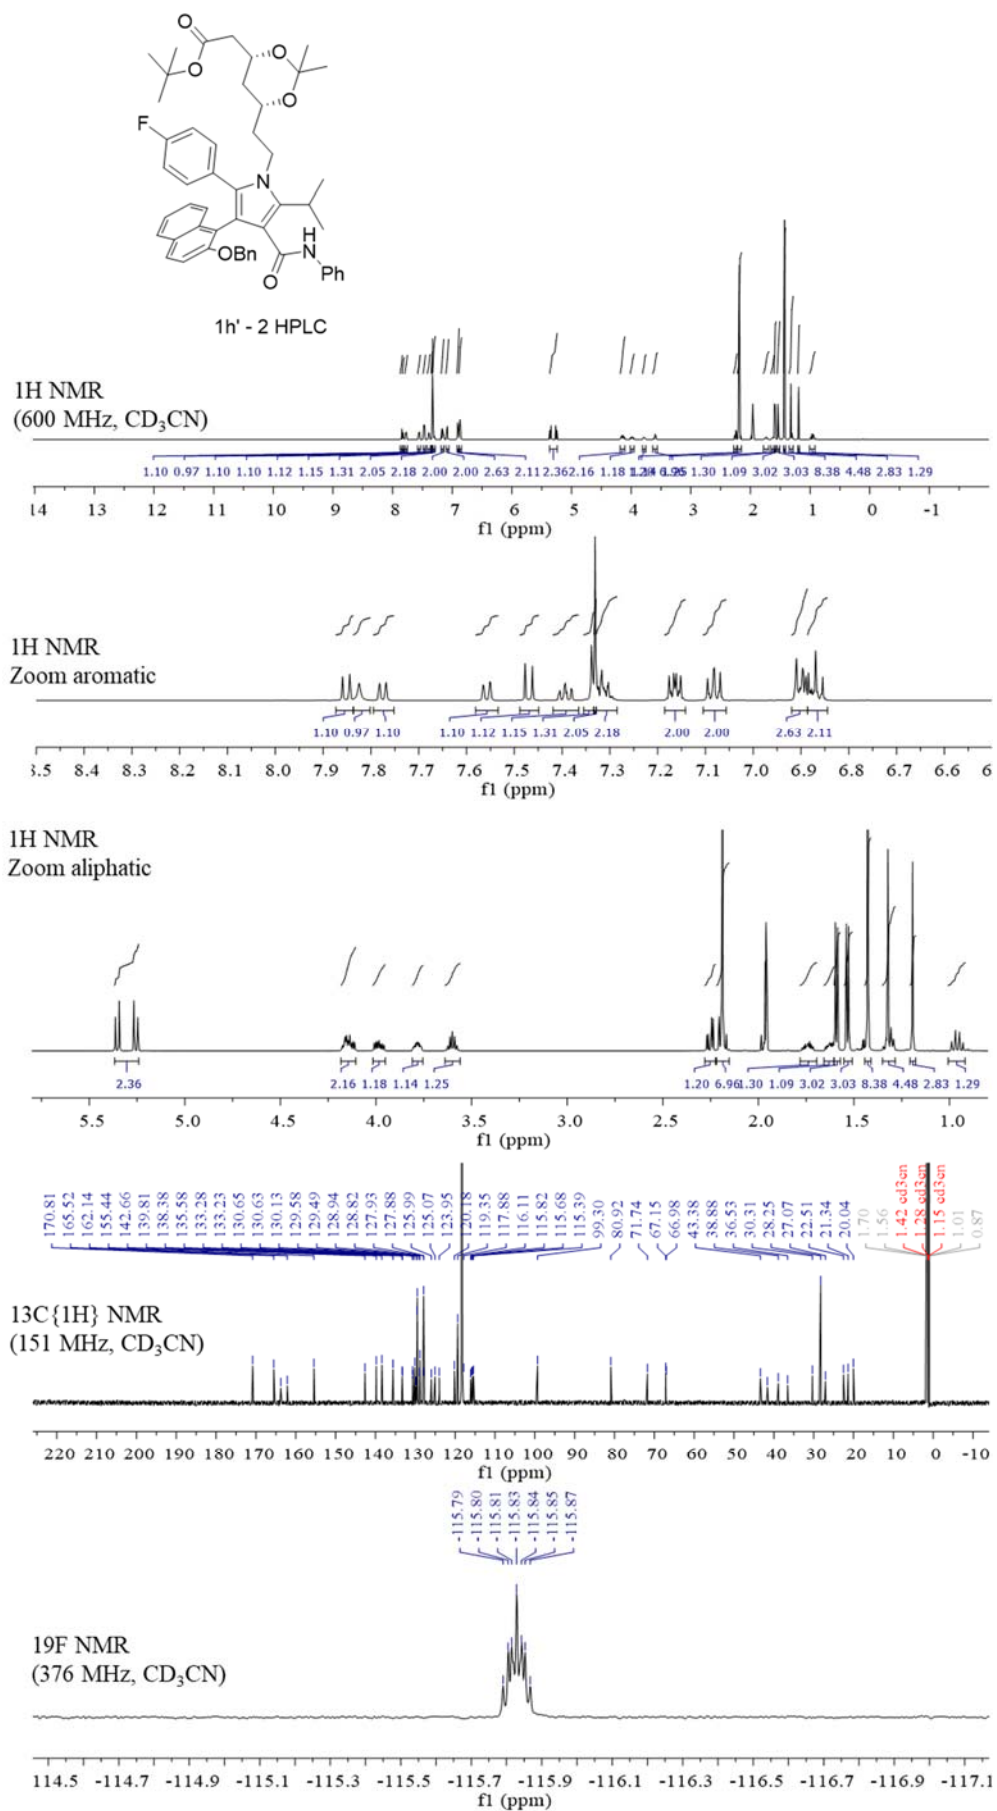

**Figure S54.** NMR spectra of **1h'** second eluted diastereoisomer in CD<sub>3</sub>CN.

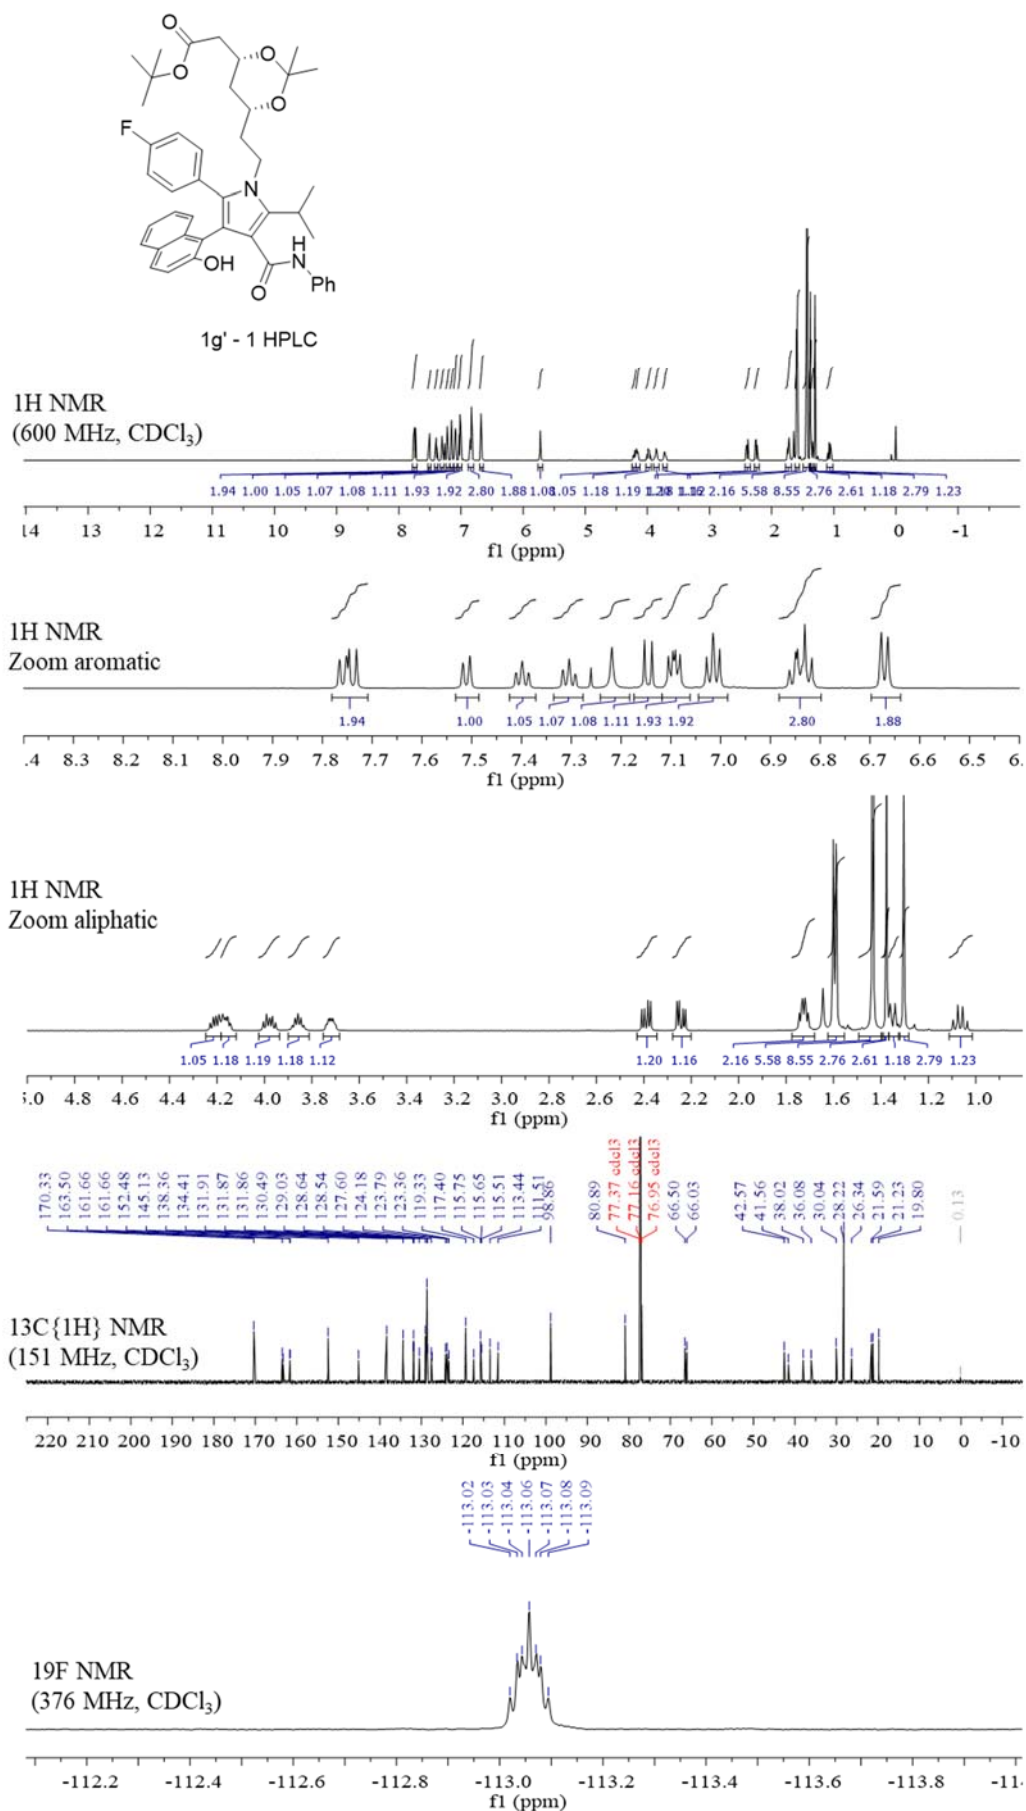

**Figure S55.** NMR spectra of **1g'** from **1h'** - 1 HPLC in CDCl<sub>3</sub>.

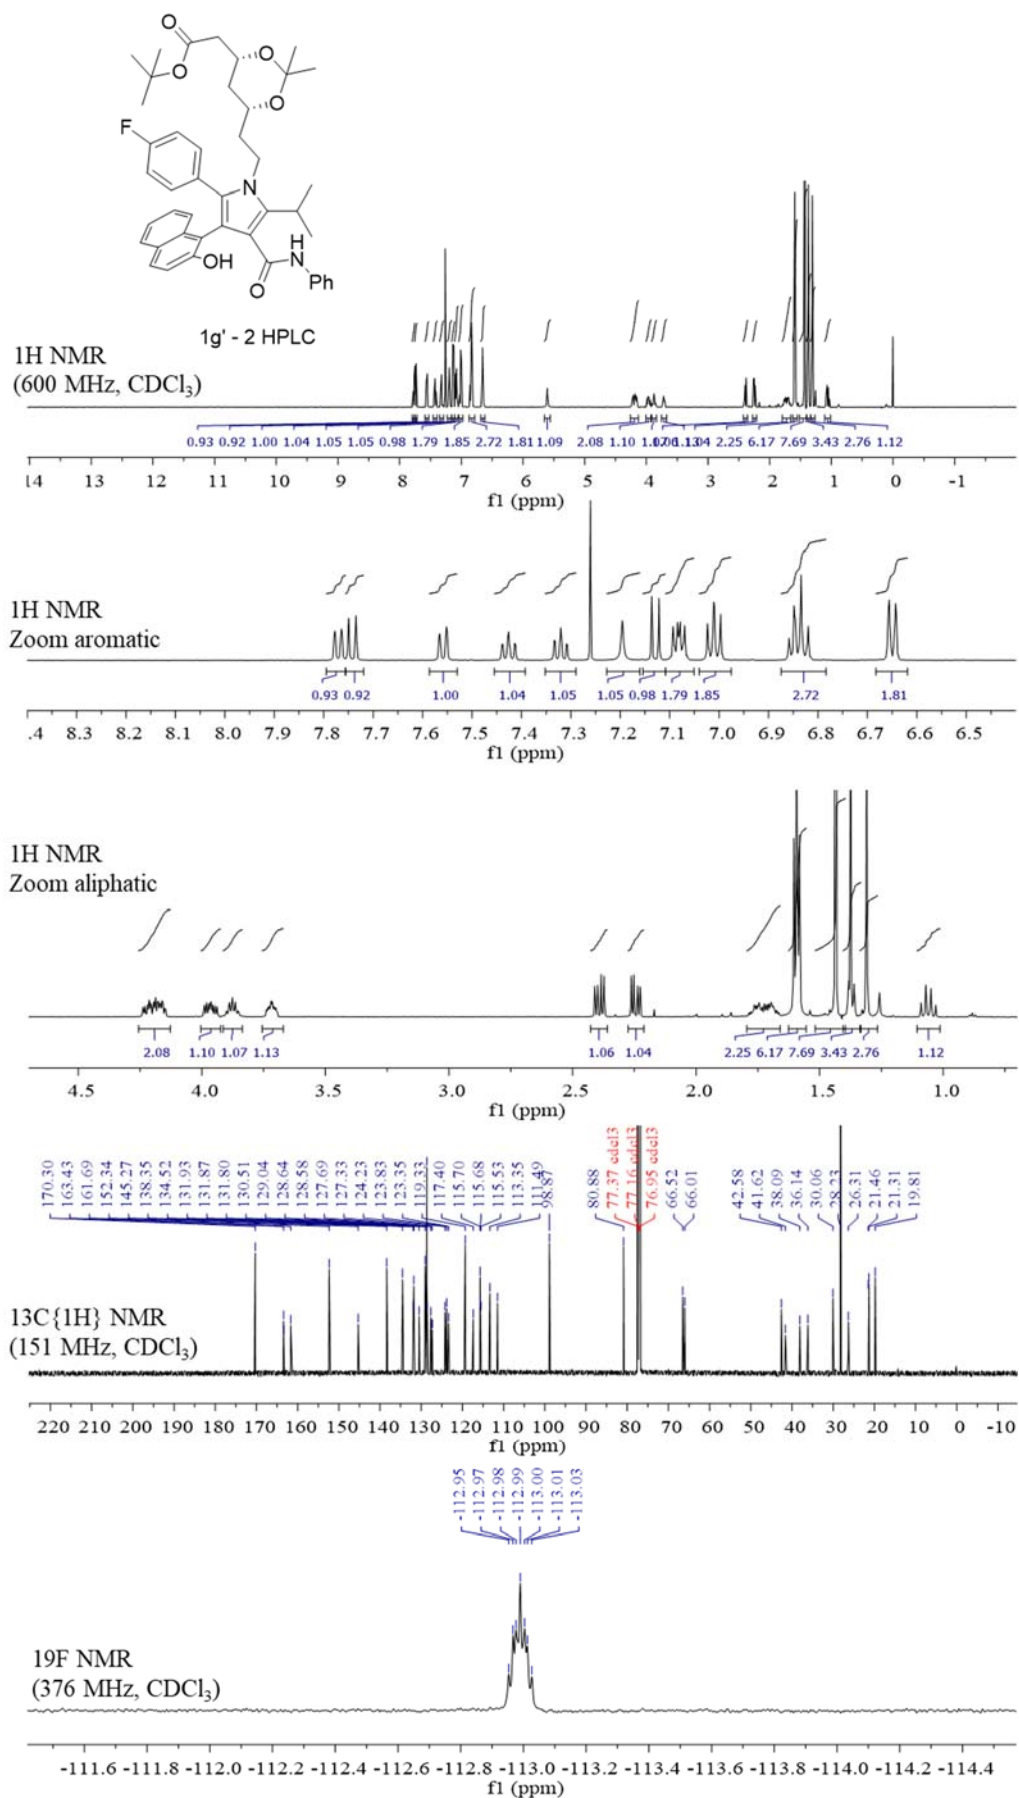

Figure S56. NMR spectra of **1g'** from **1h'** - 2 HPLC in CDCl<sub>3</sub>.

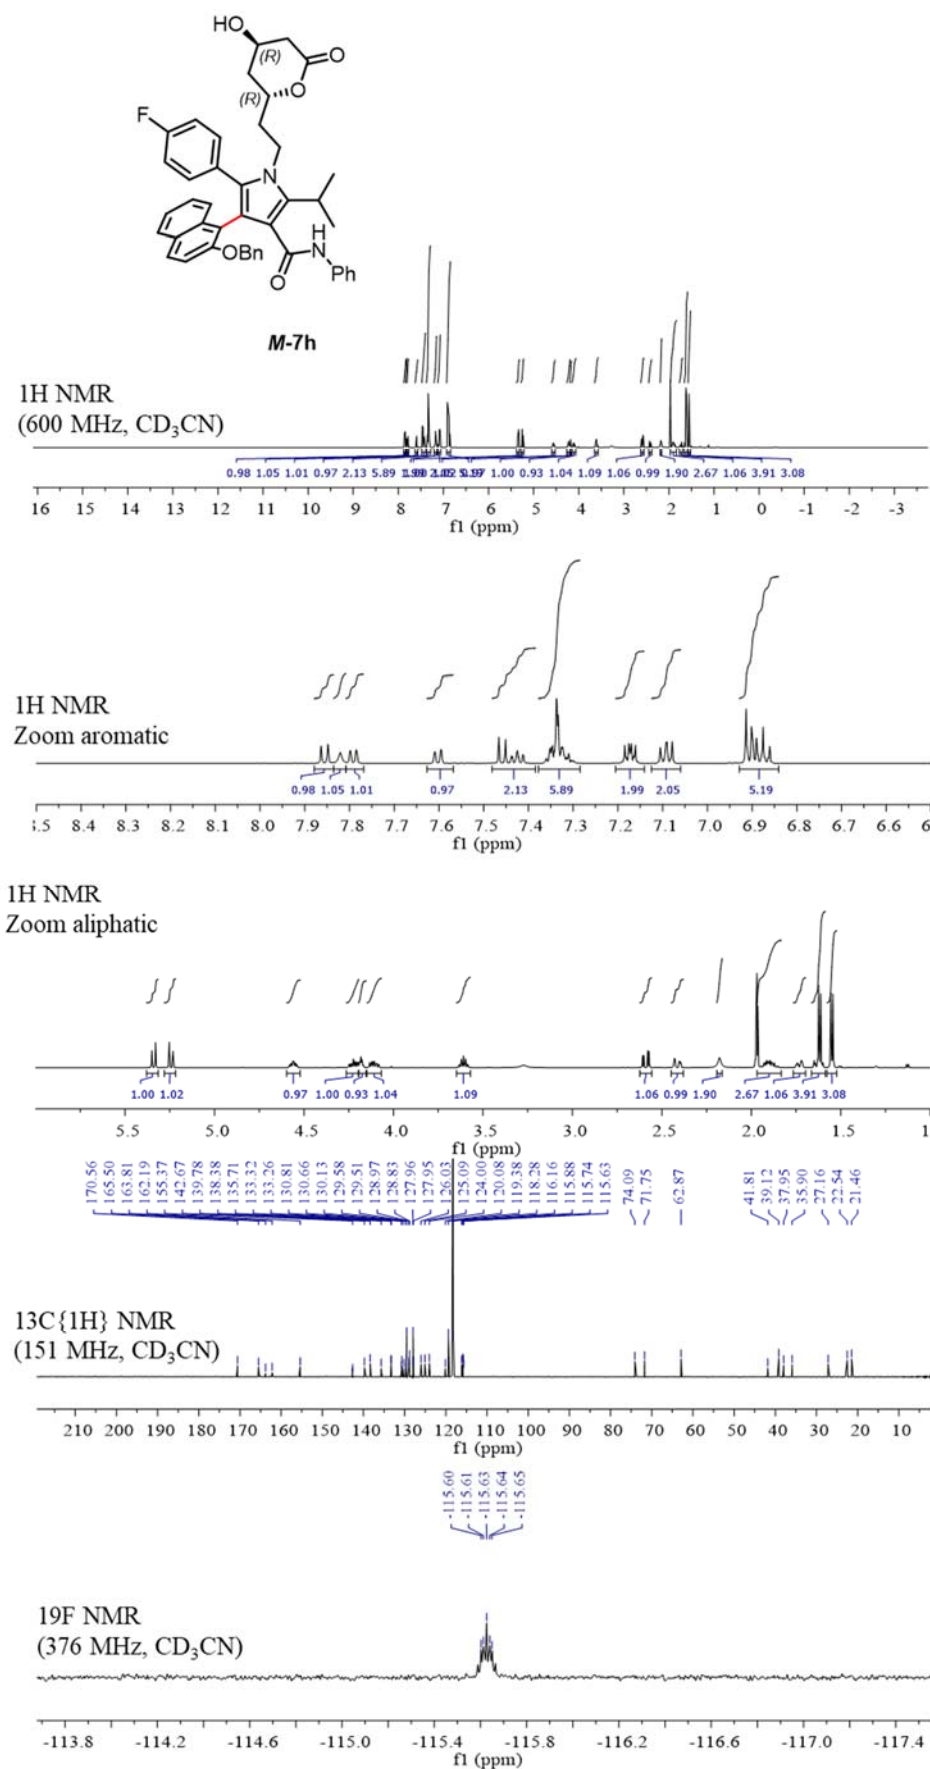

**Figure S57.** NMR spectra of **M-7h** in CD<sub>3</sub>CN.



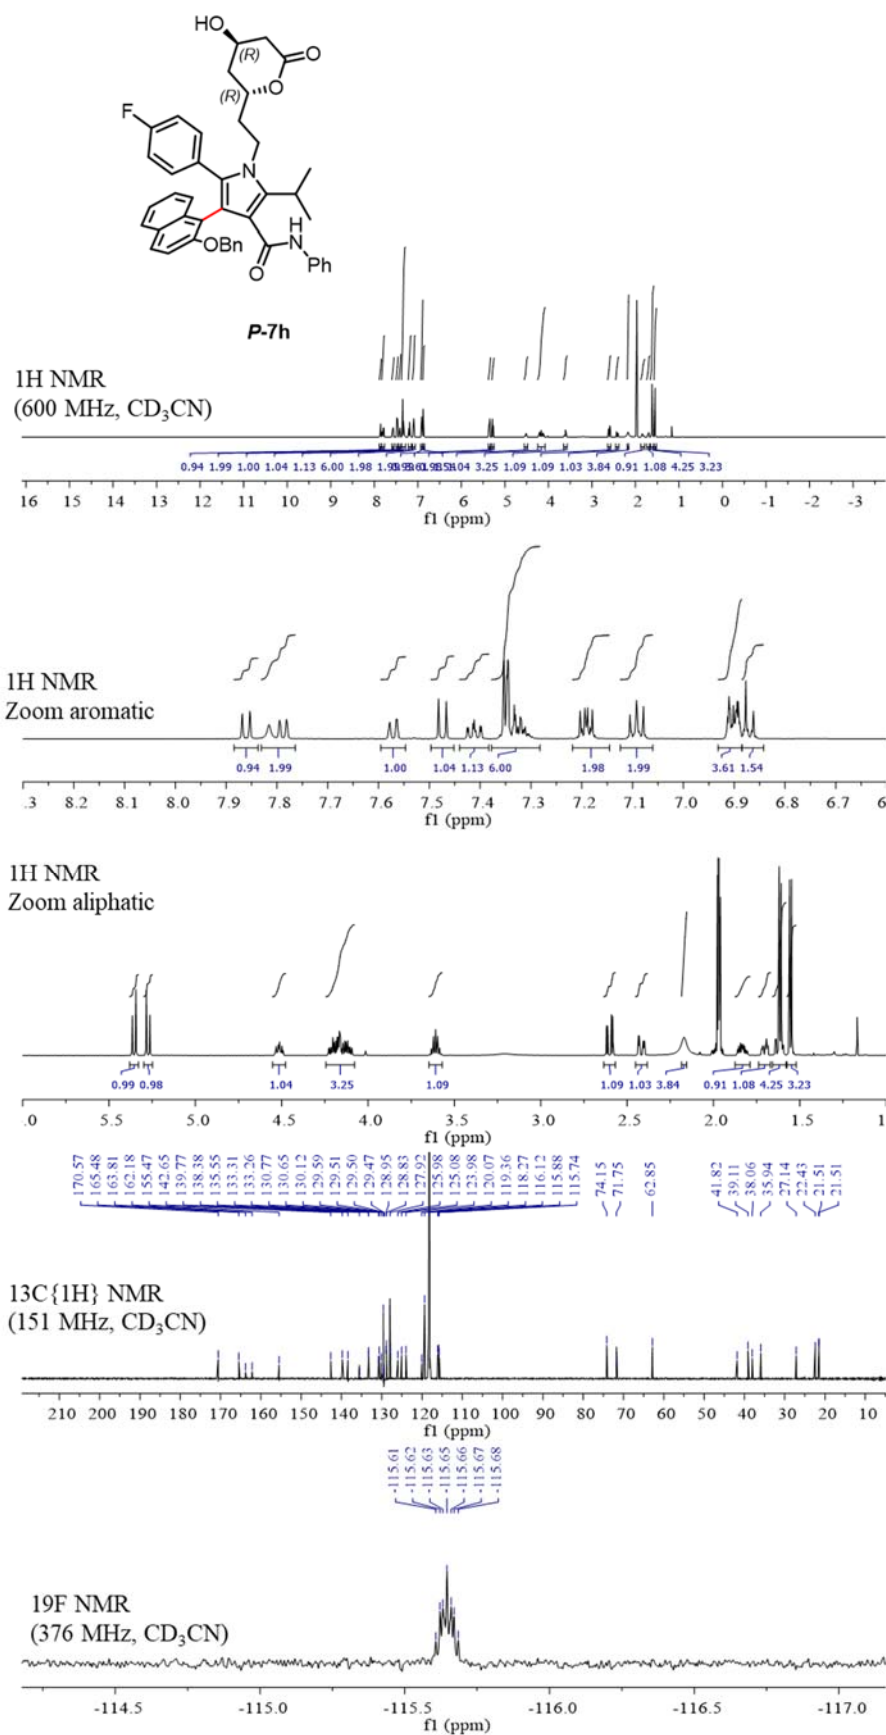

**Figure S58.** NMR spectra of **P-7h** in CD<sub>3</sub>CN.

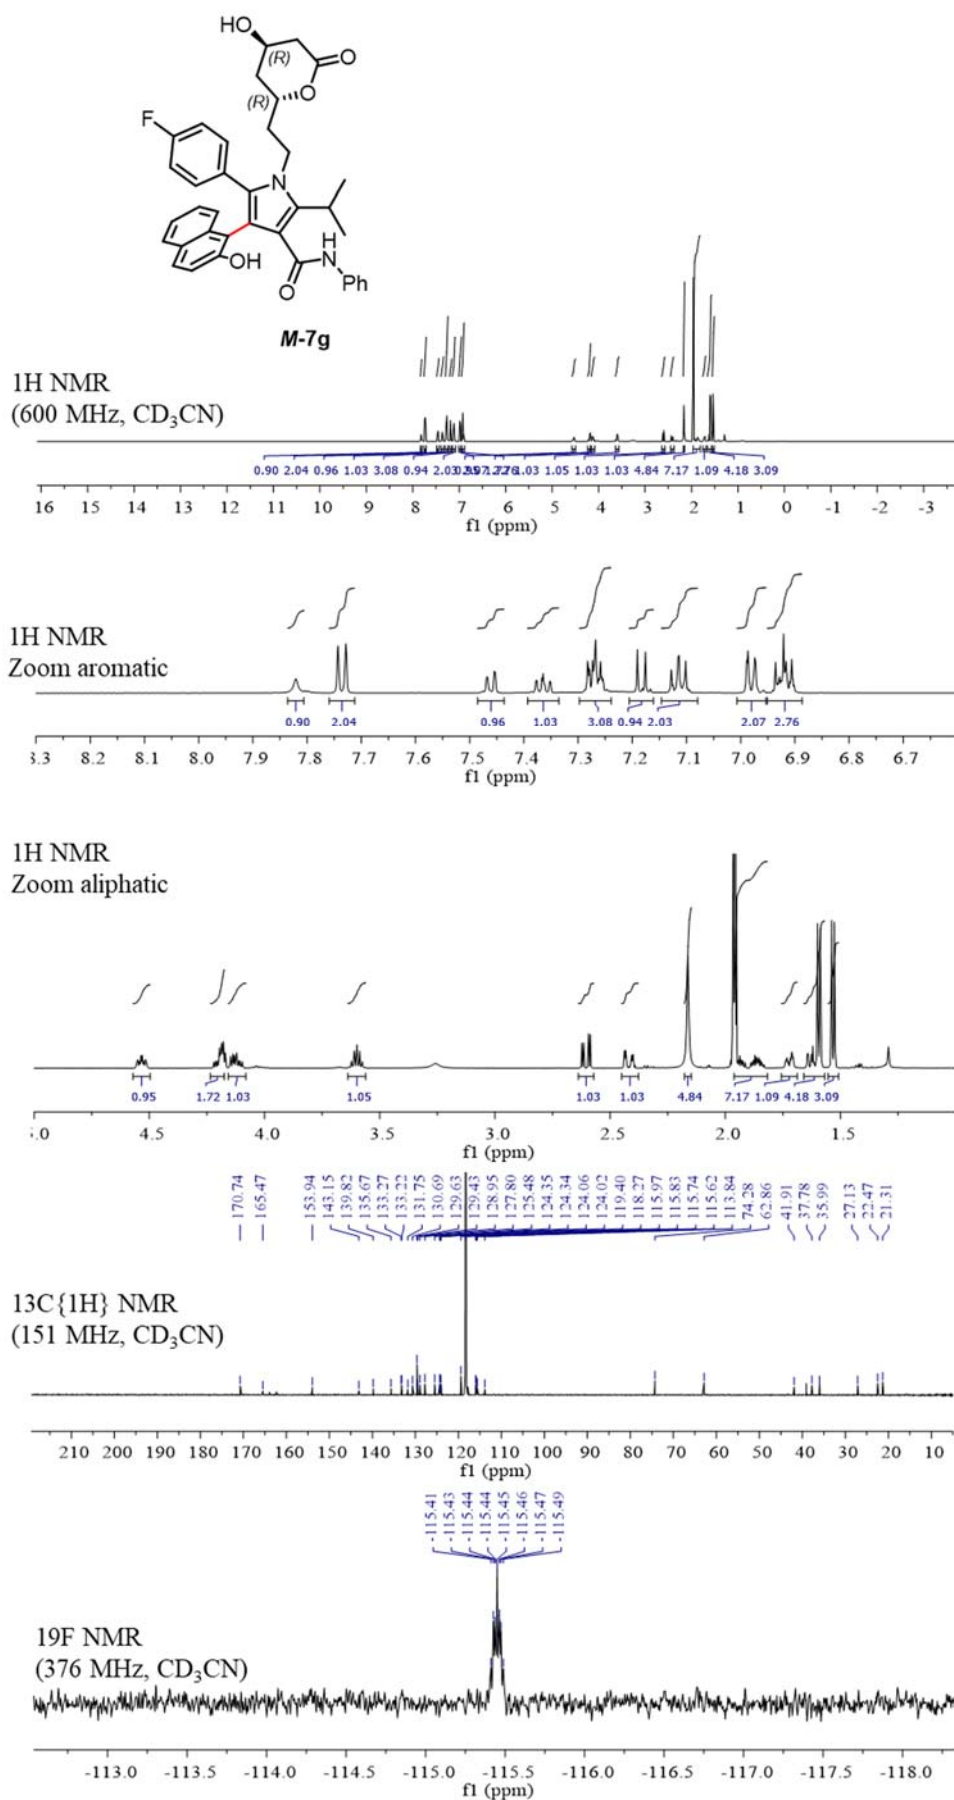

**Figure S59.** NMR spectra of **M-7g** in CD<sub>3</sub>CN.



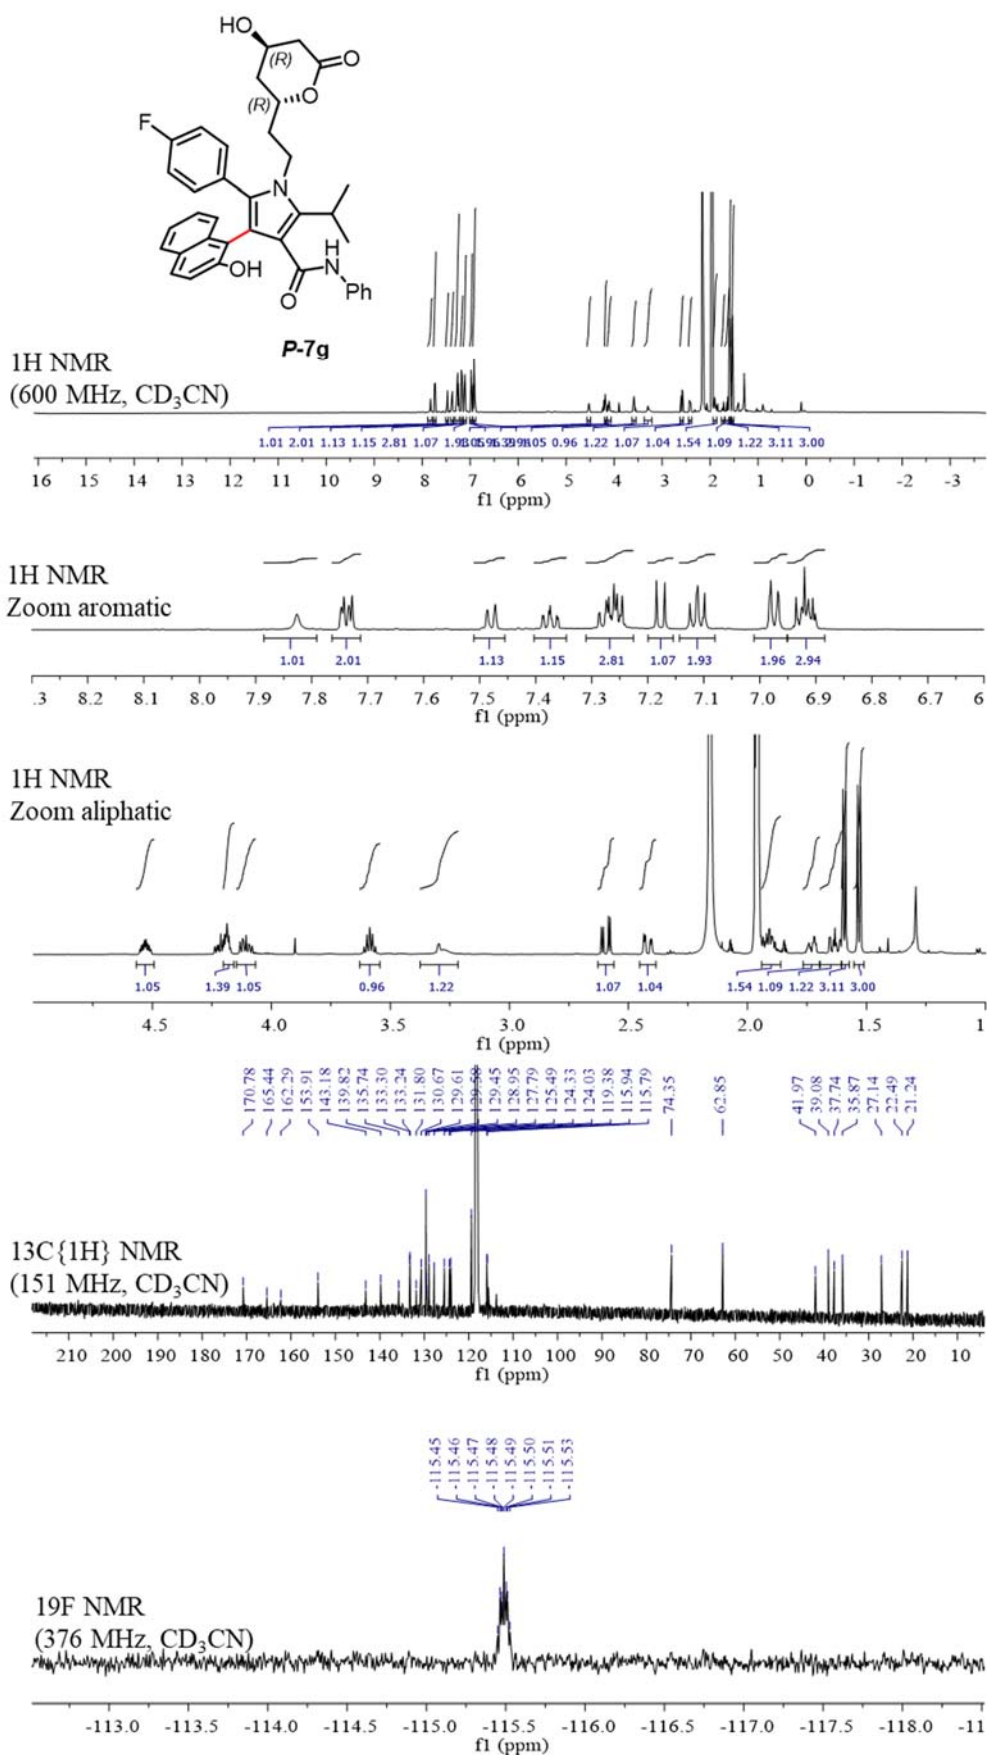

Figure S60. NMR spectra of **P-7g** in CD<sub>3</sub>CN.

## DFT calculated geometries for model compounds

Compound 1a GS1

Method: b3lyp/6-31g(d) EmpiricalDispersion=GD3 opt freq

SCF Done: E(RB3LYP) = -1268.67884275 A.U. after 1 cycles

Lowest frequency = 21.0239

Zero-point correction= 0.496056  
(Hartree/Particle)  
Thermal correction to Energy= 0.524125  
Thermal correction to Enthalpy= 0.525069  
Thermal correction to Gibbs Free Energy= 0.436271  
Sum of electronic and zero-point Energies= -1268.182787  
Sum of electronic and thermal Energies= -1268.154718  
Sum of electronic and thermal Enthalpies= -1268.153774  
Sum of electronic and thermal Free Energies= -1268.242572

Standard orientation:

| Center<br>Number | Atomic<br>Number | Atomic<br>Type | Coordinates (Angstroms) |           |           |
|------------------|------------------|----------------|-------------------------|-----------|-----------|
|                  |                  |                | X                       | Y         | Z         |
| 1                | 6                | 0              | -0.775560               | 2.304347  | -0.021391 |
| 2                | 6                | 0              | 0.110784                | 1.228445  | -0.103344 |
| 3                | 6                | 0              | -0.669561               | 0.022229  | -0.169472 |
| 4                | 6                | 0              | -2.001802               | 0.396267  | -0.126879 |
| 5                | 7                | 0              | -2.052956               | 1.787714  | -0.042516 |
| 6                | 6                | 0              | -3.191271               | -0.467595 | -0.136865 |
| 7                | 6                | 0              | -3.280100               | -1.534838 | -1.048401 |
| 8                | 6                | 0              | -4.232308               | -0.297425 | 0.795160  |
| 9                | 6                | 0              | -4.371145               | -2.401374 | -1.026048 |
| 10               | 6                | 0              | -5.329977               | -1.156899 | 0.806045  |
| 11               | 6                | 0              | -5.403066               | -2.214096 | -0.103417 |
| 12               | 6                | 0              | -0.158034               | -1.368082 | -0.269086 |
| 13               | 6                | 0              | 0.529041                | -1.758100 | -1.431769 |
| 14               | 6                | 0              | -0.292408               | -2.285685 | 0.797816  |
| 15               | 6                | 0              | 1.075985                | -3.032420 | -1.555787 |
| 16               | 6                | 0              | 0.262561                | -3.565439 | 0.653358  |
| 17               | 6                | 0              | 0.939388                | -3.942885 | -0.505842 |
| 18               | 6                | 0              | 1.588105                | 1.378127  | -0.116739 |
| 19               | 8                | 0              | 2.145685                | 2.411340  | -0.494700 |
| 20               | 6                | 0              | -0.433269               | 3.772733  | 0.086001  |
| 21               | 6                | 0              | -0.470318               | 4.473321  | -1.287093 |
| 22               | 6                | 0              | -1.217496               | 4.548105  | 1.162645  |
| 23               | 7                | 0              | 2.283268                | 0.277205  | 0.338972  |
| 24               | 6                | 0              | 3.662846                | 0.008770  | 0.269414  |
| 25               | 1                | 0              | 1.719565                | -0.519370 | 0.603155  |
| 26               | 6                | 0              | -3.283322               | 2.564835  | -0.151305 |
| 27               | 6                | 0              | 4.060531                | -1.324763 | 0.471233  |
| 28               | 6                | 0              | 5.407909                | -1.670605 | 0.432301  |
| 29               | 6                | 0              | 6.379793                | -0.697835 | 0.185864  |
| 30               | 6                | 0              | 5.981265                | 0.624068  | -0.018478 |
| 31               | 6                | 0              | 4.635673                | 0.990666  | 0.023928  |
| 32               | 1                | 0              | -2.483828               | -1.679516 | -1.770897 |
| 33               | 1                | 0              | -4.165002               | 0.499500  | 1.530367  |
| 34               | 1                | 0              | -4.418933               | -3.221210 | -1.737756 |
| 35               | 1                | 0              | -6.122014               | -1.008379 | 1.535306  |
| 36               | 1                | 0              | 0.642036                | -1.034445 | -2.234290 |
| 37               | 1                | 0              | 1.609630                | -3.309788 | -2.460409 |

|    |   |   |           |           |           |
|----|---|---|-----------|-----------|-----------|
| 38 | 1 | 0 | 0.166055  | -4.274257 | 1.472610  |
| 39 | 1 | 0 | 1.364296  | -4.939960 | -0.585420 |
| 40 | 1 | 0 | 0.615582  | 3.781079  | 0.389773  |
| 41 | 1 | 0 | -1.474228 | 4.477192  | -1.729030 |
| 42 | 1 | 0 | -0.147326 | 5.516372  | -1.186811 |
| 43 | 1 | 0 | 0.211404  | 3.967478  | -1.976385 |
| 44 | 1 | 0 | -2.243159 | 4.784883  | 0.864428  |
| 45 | 1 | 0 | -1.256529 | 3.991243  | 2.105770  |
| 46 | 1 | 0 | -0.714228 | 5.501975  | 1.356681  |
| 47 | 1 | 0 | -3.649918 | 2.881402  | 0.830294  |
| 48 | 1 | 0 | -4.048464 | 1.953300  | -0.630050 |
| 49 | 1 | 0 | -3.109804 | 3.447813  | -0.765895 |
| 50 | 1 | 0 | 3.305278  | -2.089097 | 0.644618  |
| 51 | 1 | 0 | 5.697037  | -2.706553 | 0.589861  |
| 52 | 1 | 0 | 7.431710  | -0.967478 | 0.153199  |
| 53 | 1 | 0 | 6.727168  | 1.391129  | -0.211118 |
| 54 | 1 | 0 | 4.327378  | 2.013947  | -0.135436 |
| 55 | 6 | 0 | -1.008059 | -1.909038 | 2.073269  |
| 56 | 1 | 0 | -2.095437 | -1.919946 | 1.932893  |
| 57 | 1 | 0 | -0.765397 | -2.606774 | 2.880991  |
| 58 | 1 | 0 | -0.742214 | -0.896867 | 2.396382  |
| 59 | 1 | 0 | -6.255418 | -2.887824 | -0.091116 |

Compound 1a GS2

Method: b3lyp/6-31g(d) EmpiricalDispersion=GD3 opt freq

SCF Done: E(RB3LYP) = -1268.68001485 A.U. after 1 cycles

Lowest frequency = 21.3815

Zero-point correction= 0.496152  
(Hartree/Particle)  
Thermal correction to Energy= 0.524136  
Thermal correction to Enthalpy= 0.525080  
Thermal correction to Gibbs Free Energy= 0.436721  
Sum of electronic and zero-point Energies= -1268.183863  
Sum of electronic and thermal Energies= -1268.155879  
Sum of electronic and thermal Enthalpies= -1268.154935  
Sum of electronic and thermal Free Energies= -1268.243294

Standard orientation:

| Center<br>Number | Atomic<br>Number | Atomic<br>Type | Coordinates (Angstroms) |           |           |
|------------------|------------------|----------------|-------------------------|-----------|-----------|
|                  |                  |                | X                       | Y         | Z         |
| 1                | 6                | 0              | -0.724763               | 2.391245  | -0.010868 |
| 2                | 6                | 0              | 0.108274                | 1.273466  | -0.105537 |
| 3                | 6                | 0              | -0.735459               | 0.108438  | -0.171770 |
| 4                | 6                | 0              | -2.048076               | 0.545338  | -0.117511 |
| 5                | 7                | 0              | -2.025714               | 1.934625  | -0.021982 |
| 6                | 6                | 0              | -3.277433               | -0.260941 | -0.117420 |
| 7                | 6                | 0              | -4.292548               | -0.053541 | 0.835602  |
| 8                | 6                | 0              | -3.431844               | -1.311787 | -1.038845 |
| 9                | 6                | 0              | -5.429828               | -0.859927 | 0.855807  |
| 10               | 6                | 0              | -4.562305               | -2.125999 | -1.006932 |
| 11               | 6                | 0              | -5.568506               | -1.901066 | -0.064461 |
| 12               | 6                | 0              | -0.295623               | -1.305258 | -0.285698 |
| 13               | 6                | 0              | -0.473856               | -2.225876 | 0.772044  |
| 14               | 6                | 0              | 0.369186                | -1.717362 | -1.453576 |
| 15               | 6                | 0              | 0.015170                | -3.530848 | 0.612777  |

|    |   |   |           |           |           |
|----|---|---|-----------|-----------|-----------|
| 16 | 6 | 0 | 0.850412  | -3.016176 | -1.592236 |
| 17 | 6 | 0 | 0.669486  | -3.929942 | -0.551825 |
| 18 | 6 | 0 | 1.592960  | 1.310985  | -0.148804 |
| 19 | 8 | 0 | 2.227491  | 2.267001  | -0.599045 |
| 20 | 6 | 0 | -0.427835 | 3.869821  | 0.108444  |
| 21 | 6 | 0 | 0.011915  | 4.467618  | -1.243432 |
| 22 | 6 | 0 | 0.579900  | 4.191548  | 1.228676  |
| 23 | 7 | 0 | 2.207763  | 0.188427  | 0.364715  |
| 24 | 6 | 0 | 3.557703  | -0.200446 | 0.270944  |
| 25 | 1 | 0 | 1.588233  | -0.544796 | 0.681592  |
| 26 | 6 | 0 | -3.201096 | 2.794588  | -0.118502 |
| 27 | 6 | 0 | 3.844987  | -1.556995 | 0.502549  |
| 28 | 6 | 0 | 5.157065  | -2.017327 | 0.445784  |
| 29 | 6 | 0 | 6.201668  | -1.137835 | 0.151090  |
| 30 | 6 | 0 | 5.912163  | 0.207237  | -0.083363 |
| 31 | 6 | 0 | 4.603718  | 0.688065  | -0.023132 |
| 32 | 1 | 0 | -4.173012 | 0.729044  | 1.579912  |
| 33 | 1 | 0 | -2.655053 | -1.485587 | -1.776052 |
| 34 | 1 | 0 | -6.201066 | -0.683528 | 1.600965  |
| 35 | 1 | 0 | -4.660962 | -2.934337 | -1.726504 |
| 36 | 1 | 0 | 0.517475  | -0.992071 | -2.248859 |
| 37 | 1 | 0 | -0.115830 | -4.242405 | 1.424882  |
| 38 | 1 | 0 | 1.368338  | -3.310383 | -2.500647 |
| 39 | 1 | 0 | 1.043327  | -4.946297 | -0.642891 |
| 40 | 1 | 0 | -1.365196 | 4.360843  | 0.396090  |
| 41 | 1 | 0 | 0.945938  | 4.001831  | -1.563793 |
| 42 | 1 | 0 | 0.164734  | 5.549473  | -1.147943 |
| 43 | 1 | 0 | -0.747309 | 4.297815  | -2.016894 |
| 44 | 1 | 0 | 1.570227  | 3.801098  | 0.991028  |
| 45 | 1 | 0 | 0.252717  | 3.766506  | 2.184432  |
| 46 | 1 | 0 | 0.659520  | 5.278518  | 1.348356  |
| 47 | 1 | 0 | -3.033891 | 3.578320  | -0.861295 |
| 48 | 1 | 0 | -4.053426 | 2.195261  | -0.436056 |
| 49 | 1 | 0 | -3.438608 | 3.260632  | 0.843982  |
| 50 | 1 | 0 | 3.031592  | -2.249294 | 0.711193  |
| 51 | 1 | 0 | 5.361082  | -3.069605 | 0.626493  |
| 52 | 1 | 0 | 7.225921  | -1.497020 | 0.104124  |
| 53 | 1 | 0 | 6.715668  | 0.902278  | -0.313794 |
| 54 | 1 | 0 | 4.379757  | 1.729023  | -0.206779 |
| 55 | 6 | 0 | -1.166057 | -1.828909 | 2.054537  |
| 56 | 1 | 0 | -2.254417 | -1.804408 | 1.923856  |
| 57 | 1 | 0 | -0.939424 | -2.536375 | 2.858505  |
| 58 | 1 | 0 | -0.865369 | -0.826714 | 2.378122  |
| 59 | 1 | 0 | -6.451517 | -2.533882 | -0.044854 |

-----

Compound 1a GS3

Method: b3lyp/6-31g(d) EmpiricalDispersion=GD3 opt freq

SCF Done: E(RB3LYP) = -1268.68001485 A.U. after 1 cycles

Lowest frequency = 21.3843

|                                            |              |
|--------------------------------------------|--------------|
| Zero-point correction=                     | 0.496152     |
| (Hartree/Particle)                         |              |
| Thermal correction to Energy=              | 0.524136     |
| Thermal correction to Enthalpy=            | 0.525080     |
| Thermal correction to Gibbs Free Energy=   | 0.436722     |
| Sum of electronic and zero-point Energies= | -1268.183863 |
| Sum of electronic and thermal Energies=    | -1268.155879 |
| Sum of electronic and thermal Enthalpies=  | -1268.154935 |

Sum of electronic and thermal Free Energies= -1268.243293

Standard orientation:

| Center<br>Number | Atomic<br>Number | Atomic<br>Type | Coordinates (Angstroms) |           |           |
|------------------|------------------|----------------|-------------------------|-----------|-----------|
|                  |                  |                | X                       | Y         | Z         |
| 1                | 6                | 0              | -0.724817               | 2.391250  | -0.010862 |
| 2                | 6                | 0              | 0.108256                | 1.273492  | -0.105516 |
| 3                | 6                | 0              | -0.735444               | 0.108436  | -0.171738 |
| 4                | 6                | 0              | -2.048075               | 0.545309  | -0.117488 |
| 5                | 7                | 0              | -2.025749               | 1.934594  | -0.021983 |
| 6                | 6                | 0              | -3.277414               | -0.260997 | -0.117400 |
| 7                | 6                | 0              | -4.292561               | -0.053581 | 0.835584  |
| 8                | 6                | 0              | -3.431793               | -1.311863 | -1.038810 |
| 9                | 6                | 0              | -5.429838               | -0.859971 | 0.855772  |
| 10               | 6                | 0              | -4.562250               | -2.126079 | -1.006912 |
| 11               | 6                | 0              | -5.568482               | -1.901130 | -0.064477 |
| 12               | 6                | 0              | -0.295575               | -1.305251 | -0.285689 |
| 13               | 6                | 0              | -0.473784               | -2.225897 | 0.772035  |
| 14               | 6                | 0              | 0.369239                | -1.717317 | -1.453578 |
| 15               | 6                | 0              | 0.015270                | -3.530855 | 0.612737  |
| 16               | 6                | 0              | 0.850489                | -3.016116 | -1.592268 |
| 17               | 6                | 0              | 0.669587                | -3.929910 | -0.551876 |
| 18               | 6                | 0              | 1.592939                | 1.311034  | -0.148757 |
| 19               | 8                | 0              | 2.227465                | 2.267067  | -0.598974 |
| 20               | 6                | 0              | -0.427914               | 3.869837  | 0.108400  |
| 21               | 6                | 0              | 0.011842                | 4.467601  | -1.243490 |
| 22               | 6                | 0              | 0.579784                | 4.191618  | 1.228652  |
| 23               | 7                | 0              | 2.207753                | 0.188478  | 0.364759  |
| 24               | 6                | 0              | 3.557692                | -0.200400 | 0.270971  |
| 25               | 1                | 0              | 1.588225                | -0.544750 | 0.681631  |
| 26               | 6                | 0              | -3.201166               | 2.794512  | -0.118487 |
| 27               | 6                | 0              | 4.603712                | 0.688102  | -0.023115 |
| 28               | 6                | 0              | 5.912152                | 0.207264  | -0.083376 |
| 29               | 6                | 0              | 6.201650                | -1.137812 | 0.151062  |
| 30               | 6                | 0              | 5.157045                | -2.017295 | 0.445777  |
| 31               | 6                | 0              | 3.844972                | -1.556952 | 0.502570  |
| 32               | 1                | 0              | -4.173056               | 0.729032  | 1.579871  |
| 33               | 1                | 0              | -2.654979               | -1.485669 | -1.775992 |
| 34               | 1                | 0              | -6.201105               | -0.683554 | 1.600896  |
| 35               | 1                | 0              | -4.660881               | -2.934436 | -1.726468 |
| 36               | 1                | 0              | 0.517499                | -0.992006 | -2.248848 |
| 37               | 1                | 0              | -0.115715               | -4.242435 | 1.424825  |
| 38               | 1                | 0              | 1.368417                | -3.310300 | -2.500686 |
| 39               | 1                | 0              | 1.043452                | -4.946253 | -0.642967 |
| 40               | 1                | 0              | -1.365291               | 4.360855  | 0.396006  |
| 41               | 1                | 0              | 0.945890                | 4.001844  | -1.563824 |
| 42               | 1                | 0              | 0.164615                | 5.549465  | -1.148032 |
| 43               | 1                | 0              | -0.747367               | 4.297740  | -2.016954 |
| 44               | 1                | 0              | 1.570125                | 3.801174  | 0.991050  |
| 45               | 1                | 0              | 0.252570                | 3.766612  | 2.184413  |
| 46               | 1                | 0              | 0.659394                | 5.278593  | 1.348291  |
| 47               | 1                | 0              | -3.034004               | 3.578257  | -0.861274 |
| 48               | 1                | 0              | -4.053471               | 2.195149  | -0.436043 |
| 49               | 1                | 0              | -3.438690               | 3.260537  | 0.844003  |
| 50               | 1                | 0              | 4.379757                | 1.729066  | -0.206731 |
| 51               | 1                | 0              | 6.715659                | 0.902297  | -0.313821 |
| 52               | 1                | 0              | 7.225899                | -1.497005 | 0.104072  |

|    |   |   |           |           |           |
|----|---|---|-----------|-----------|-----------|
| 53 | 1 | 0 | 5.361058  | -3.069574 | 0.626482  |
| 54 | 1 | 0 | 3.031577  | -2.249247 | 0.711225  |
| 55 | 6 | 0 | -1.165988 | -1.828981 | 2.054546  |
| 56 | 1 | 0 | -0.865352 | -0.826774 | 2.378142  |
| 57 | 1 | 0 | -2.254353 | -1.804542 | 1.923889  |
| 58 | 1 | 0 | -0.939301 | -2.536446 | 2.858500  |
| 59 | 1 | 0 | -6.451488 | -2.533953 | -0.044882 |

Compound 1a GS4

Method: b3lyp/6-31g(d) EmpiricalDispersion=GD3 opt freq

SCF Done: E(RB3LYP) = -1268.68072355 A.U. after 1 cycles

Lowest frequency = 21.7730

Zero-point correction= 0.496151  
(Hartree/Particle)  
Thermal correction to Energy= 0.524138  
Thermal correction to Enthalpy= 0.525082  
Thermal correction to Gibbs Free Energy= 0.436788  
Sum of electronic and zero-point Energies= -1268.184572  
Sum of electronic and thermal Energies= -1268.156586  
Sum of electronic and thermal Enthalpies= -1268.155641  
Sum of electronic and thermal Free Energies= -1268.243935

Standard orientation:

| Center<br>Number | Atomic<br>Number | Atomic<br>Type | Coordinates (Angstroms) |           |           |
|------------------|------------------|----------------|-------------------------|-----------|-----------|
|                  |                  |                | X                       | Y         | Z         |
| 1                | 6                | 0              | -0.866684               | 2.359982  | -0.091643 |
| 2                | 6                | 0              | 0.010494                | 1.276134  | -0.042192 |
| 3                | 6                | 0              | -0.780917               | 0.074627  | -0.003034 |
| 4                | 6                | 0              | -2.111561               | 0.458371  | -0.035003 |
| 5                | 7                | 0              | -2.147729               | 1.850254  | -0.086294 |
| 6                | 6                | 0              | -3.309817               | -0.395677 | -0.039289 |
| 7                | 6                | 0              | -4.338093               | -0.215856 | -0.982156 |
| 8                | 6                | 0              | -3.424569               | -1.452421 | 0.880918  |
| 9                | 6                | 0              | -5.451740               | -1.055091 | -0.993593 |
| 10               | 6                | 0              | -4.531055               | -2.298555 | 0.859080  |
| 11               | 6                | 0              | -5.552159               | -2.100563 | -0.073667 |
| 12               | 6                | 0              | -0.297137               | -1.328831 | 0.023416  |
| 13               | 6                | 0              | 0.465214                | -1.833772 | 1.103075  |
| 14               | 6                | 0              | -0.587952               | -2.167706 | -1.065312 |
| 15               | 6                | 0              | 0.917035                | -3.157374 | 1.040660  |
| 16               | 6                | 0              | -0.130537               | -3.484181 | -1.108236 |
| 17               | 6                | 0              | 0.631125                | -3.979878 | -0.049872 |
| 18               | 6                | 0              | 1.490491                | 1.359003  | 0.004054  |
| 19               | 8                | 0              | 2.100162                | 2.283824  | 0.544455  |
| 20               | 6                | 0              | -0.623150               | 3.851081  | -0.150905 |
| 21               | 6                | 0              | 0.392462                | 4.250551  | -1.238153 |
| 22               | 6                | 0              | -0.220910               | 4.404995  | 1.231401  |
| 23               | 7                | 0              | 2.132378                | 0.295916  | -0.598735 |
| 24               | 6                | 0              | 3.472047                | -0.114377 | -0.453319 |
| 25               | 1                | 0              | 1.525976                | -0.404341 | -1.004679 |
| 26               | 6                | 0              | -3.355907               | 2.659399  | 0.036311  |
| 27               | 6                | 0              | 3.765328                | -1.454336 | -0.761281 |
| 28               | 6                | 0              | 5.067671                | -1.931861 | -0.648134 |
| 29               | 6                | 0              | 6.094792                | -1.087351 | -0.219958 |
| 30               | 6                | 0              | 5.798856                | 0.240977  | 0.089758  |

|    |   |   |           |           |           |
|----|---|---|-----------|-----------|-----------|
| 31 | 6 | 0 | 4.500844  | 0.739632  | -0.026111 |
| 32 | 1 | 0 | -4.249844 | 0.574226  | -1.723110 |
| 33 | 1 | 0 | -2.634652 | -1.605100 | 1.609317  |
| 34 | 1 | 0 | -6.234858 | -0.899806 | -1.731070 |
| 35 | 1 | 0 | -4.599617 | -3.110858 | 1.577700  |
| 36 | 1 | 0 | -1.182980 | -1.769098 | -1.882090 |
| 37 | 1 | 0 | 1.506866  | -3.548451 | 1.866375  |
| 38 | 1 | 0 | -0.367367 | -4.114530 | -1.960989 |
| 39 | 1 | 0 | 0.998511  | -5.002522 | -0.068693 |
| 40 | 1 | 0 | -1.572812 | 4.321266  | -0.433599 |
| 41 | 1 | 0 | 1.392089  | 3.886897  | -0.995531 |
| 42 | 1 | 0 | 0.436198  | 5.343308  | -1.315342 |
| 43 | 1 | 0 | 0.099474  | 3.850852  | -2.215555 |
| 44 | 1 | 0 | 0.723085  | 3.954038  | 1.544914  |
| 45 | 1 | 0 | -0.983856 | 4.178738  | 1.986498  |
| 46 | 1 | 0 | -0.100370 | 5.494077  | 1.184523  |
| 47 | 1 | 0 | -3.609271 | 3.148429  | -0.910624 |
| 48 | 1 | 0 | -4.184793 | 2.016743  | 0.330072  |
| 49 | 1 | 0 | -3.220427 | 3.423571  | 0.805668  |
| 50 | 1 | 0 | 2.964096  | -2.121499 | -1.071969 |
| 51 | 1 | 0 | 5.276989  | -2.970857 | -0.889224 |
| 52 | 1 | 0 | 7.111012  | -1.460568 | -0.128900 |
| 53 | 1 | 0 | 6.589106  | 0.908854  | 0.423149  |
| 54 | 1 | 0 | 4.271396  | 1.768113  | 0.213003  |
| 55 | 6 | 0 | 0.814435  | -0.975612 | 2.295925  |
| 56 | 1 | 0 | 0.009353  | -0.274796 | 2.537049  |
| 57 | 1 | 0 | 1.015217  | -1.594224 | 3.176558  |
| 58 | 1 | 0 | 1.713113  | -0.375998 | 2.105525  |
| 59 | 1 | 0 | -6.417117 | -2.758089 | -0.085847 |

Compound 1a GS5

Method: b3lyp/6-31g(d) EmpiricalDispersion=GD3 opt freq

SCF Done: E(RB3LYP) = -1268.67932559 A.U. after 1 cycles

Lowest frequency = 20.7365

Zero-point correction= 0.495958  
(Hartree/Particle)  
Thermal correction to Energy= 0.524080  
Thermal correction to Enthalpy= 0.525024  
Thermal correction to Gibbs Free Energy= 0.436024  
Sum of electronic and zero-point Energies= -1268.183368  
Sum of electronic and thermal Energies= -1268.155246  
Sum of electronic and thermal Enthalpies= -1268.154302  
Sum of electronic and thermal Free Energies= -1268.243301

Standard orientation:

| Center<br>Number | Atomic<br>Number | Atomic<br>Type | Coordinates (Angstroms) |           |           |
|------------------|------------------|----------------|-------------------------|-----------|-----------|
|                  |                  |                | X                       | Y         | Z         |
| 1                | 6                | 0              | -0.911790               | 2.267151  | -0.077711 |
| 2                | 6                | 0              | 0.014866                | 1.225479  | -0.048310 |
| 3                | 6                | 0              | -0.713445               | -0.013106 | -0.012966 |
| 4                | 6                | 0              | -2.060477               | 0.309100  | -0.028206 |
| 5                | 7                | 0              | -2.167858               | 1.700115  | -0.061508 |
| 6                | 6                | 0              | -3.217949               | -0.599334 | -0.020915 |
| 7                | 6                | 0              | -3.263364               | -1.674256 | 0.884478  |
| 8                | 6                | 0              | -4.275686               | -0.452170 | -0.936299 |

|    |   |   |           |           |           |
|----|---|---|-----------|-----------|-----------|
| 9  | 6 | 0 | -4.330155 | -2.570089 | 0.873704  |
| 10 | 6 | 0 | -5.349349 | -1.341787 | -0.936816 |
| 11 | 6 | 0 | -5.380433 | -2.405255 | -0.032636 |
| 12 | 6 | 0 | -0.161436 | -1.391108 | -0.002687 |
| 13 | 6 | 0 | 0.622492  | -1.869620 | 1.073748  |
| 14 | 6 | 0 | -0.409114 | -2.231556 | -1.100715 |
| 15 | 6 | 0 | 1.139466  | -3.168580 | 0.998544  |
| 16 | 6 | 0 | 0.112559  | -3.523261 | -1.156249 |
| 17 | 6 | 0 | 0.896107  | -3.992161 | -0.101541 |
| 18 | 6 | 0 | 1.483643  | 1.422050  | -0.032491 |
| 19 | 8 | 0 | 2.016695  | 2.430795  | 0.435122  |
| 20 | 6 | 0 | -0.621661 | 3.749492  | -0.123667 |
| 21 | 6 | 0 | -0.682285 | 4.388419  | 1.278473  |
| 22 | 6 | 0 | -1.434304 | 4.541082  | -1.166651 |
| 23 | 7 | 0 | 2.203365  | 0.378368  | -0.580226 |
| 24 | 6 | 0 | 3.576563  | 0.095555  | -0.451538 |
| 25 | 1 | 0 | 1.652173  | -0.391511 | -0.936030 |
| 26 | 6 | 0 | -3.426963 | 2.424272  | 0.077132  |
| 27 | 6 | 0 | 4.533791  | 1.053912  | -0.082831 |
| 28 | 6 | 0 | 5.873070  | 0.676841  | 0.021688  |
| 29 | 6 | 0 | 6.280323  | -0.631848 | -0.242129 |
| 30 | 6 | 0 | 5.324093  | -1.580658 | -0.612053 |
| 31 | 6 | 0 | 3.982370  | -1.224980 | -0.713145 |
| 32 | 1 | 0 | -2.451377 | -1.801450 | 1.593180  |
| 33 | 1 | 0 | -4.242813 | 0.353394  | -1.664636 |
| 34 | 1 | 0 | -4.344883 | -3.395326 | 1.580622  |
| 35 | 1 | 0 | -6.155987 | -1.210868 | -1.653385 |
| 36 | 1 | 0 | -1.020998 | -1.853478 | -1.914744 |
| 37 | 1 | 0 | 1.745786  | -3.539252 | 1.821756  |
| 38 | 1 | 0 | -0.091055 | -4.155382 | -2.016205 |
| 39 | 1 | 0 | 1.313162  | -4.995331 | -0.130511 |
| 40 | 1 | 0 | 0.426226  | 3.808462  | -0.426545 |
| 41 | 1 | 0 | -1.685735 | 4.338984  | 1.718527  |
| 42 | 1 | 0 | -0.394859 | 5.445187  | 1.224179  |
| 43 | 1 | 0 | 0.016213  | 3.875961  | 1.945795  |
| 44 | 1 | 0 | -2.469846 | 4.719512  | -0.862011 |
| 45 | 1 | 0 | -1.447476 | 4.027282  | -2.134551 |
| 46 | 1 | 0 | -0.971613 | 5.523447  | -1.313979 |
| 47 | 1 | 0 | -3.810124 | 2.757567  | -0.892625 |
| 48 | 1 | 0 | -4.165517 | 1.768216  | 0.538189  |
| 49 | 1 | 0 | -3.284997 | 3.293257  | 0.719225  |
| 50 | 1 | 0 | 4.218074  | 2.067223  | 0.120323  |
| 51 | 1 | 0 | 6.607155  | 1.425189  | 0.309553  |
| 52 | 1 | 0 | 7.327438  | -0.909699 | -0.160739 |
| 53 | 1 | 0 | 5.620383  | -2.606126 | -0.817339 |
| 54 | 1 | 0 | 3.237763  | -1.972302 | -0.979711 |
| 55 | 6 | 0 | 0.926780  | -1.006222 | 2.274905  |
| 56 | 1 | 0 | 1.787571  | -0.353172 | 2.085435  |
| 57 | 1 | 0 | 0.083095  | -0.356592 | 2.527381  |
| 58 | 1 | 0 | 1.168339  | -1.621445 | 3.147585  |
| 59 | 1 | 0 | -6.214498 | -3.101656 | -0.036275 |

-----

Compound 1a TS0

Method: b3lyp/6-31g(d) EmpiricalDispersion=GD3 opt(ts,noigentest,addredun)

SCF Done: E(RB3LYP) = -1268.64146830 A.U. after 1 cycles

Lowest frequency = -54.2258



Zero-point correction= 0.496068  
 (Hartree/Particle)  
 Thermal correction to Energy= 0.523082  
 Thermal correction to Enthalpy= 0.524026  
 Thermal correction to Gibbs Free Energy= 0.437630  
 Sum of electronic and zero-point Energies= -1268.145400  
 Sum of electronic and thermal Energies= -1268.118386  
 Sum of electronic and thermal Enthalpies= -1268.117442  
 Sum of electronic and thermal Free Energies= -1268.203838

Standard orientation:

| Center<br>Number | Atomic<br>Number | Atomic<br>Type | Coordinates (Angstroms) |           |           |
|------------------|------------------|----------------|-------------------------|-----------|-----------|
|                  |                  |                | X                       | Y         | Z         |
| 1                | 6                | 0              | -0.404966               | -2.183714 | -0.318185 |
| 2                | 6                | 0              | 0.209580                | -0.967301 | -0.548639 |
| 3                | 6                | 0              | -0.782843               | 0.098406  | -0.481438 |
| 4                | 6                | 0              | -1.978139               | -0.554717 | -0.127545 |
| 5                | 7                | 0              | -1.730595               | -1.925074 | -0.063961 |
| 6                | 6                | 0              | -3.287722               | -0.097626 | 0.396166  |
| 7                | 6                | 0              | -3.353314               | 0.436553  | 1.691176  |
| 8                | 6                | 0              | -4.480645               | -0.266193 | -0.323440 |
| 9                | 6                | 0              | -4.575963               | 0.825598  | 2.240998  |
| 10               | 6                | 0              | -5.703411               | 0.119063  | 0.224416  |
| 11               | 6                | 0              | -5.753603               | 0.670921  | 1.507292  |
| 12               | 6                | 0              | -0.479746               | 1.530631  | -0.820018 |
| 13               | 6                | 0              | -1.372467               | 2.646964  | -0.824302 |
| 14               | 6                | 0              | 0.847375                | 1.822909  | -1.224012 |
| 15               | 6                | 0              | -0.849213               | 3.940176  | -0.993286 |
| 16               | 6                | 0              | 1.340046                | 3.107837  | -1.411462 |
| 17               | 6                | 0              | 0.493092                | 4.197684  | -1.242081 |
| 18               | 6                | 0              | 1.701640                | -0.897242 | -0.611073 |
| 19               | 8                | 0              | 2.381364                | -1.400852 | -1.501463 |
| 20               | 6                | 0              | 0.152572                | -3.591339 | -0.329215 |
| 21               | 6                | 0              | 1.376082                | -3.773394 | 0.591395  |
| 22               | 6                | 0              | 0.464183                | -4.045499 | -1.770743 |
| 23               | 7                | 0              | 2.243466                | -0.280822 | 0.500726  |
| 24               | 6                | 0              | 3.573356                | 0.128704  | 0.719853  |
| 25               | 1                | 0              | 1.557297                | 0.131627  | 1.119398  |
| 26               | 6                | 0              | -2.695488               | -2.950153 | 0.318219  |
| 27               | 6                | 0              | 3.801851                | 1.051624  | 1.753937  |
| 28               | 6                | 0              | 5.091817                | 1.491651  | 2.035000  |
| 29               | 6                | 0              | 6.174617                | 1.022946  | 1.287532  |
| 30               | 6                | 0              | 5.945129                | 0.108168  | 0.259018  |
| 31               | 6                | 0              | 4.659071                | -0.347823 | -0.032226 |
| 32               | 1                | 0              | -2.433316               | 0.558881  | 2.255578  |
| 33               | 1                | 0              | -4.437466               | -0.683074 | -1.326266 |
| 34               | 1                | 0              | -4.608223               | 1.248496  | 3.241542  |
| 35               | 1                | 0              | -6.616563               | -0.005588 | -0.351298 |
| 36               | 1                | 0              | 1.528785                | 1.020743  | -1.452923 |
| 37               | 1                | 0              | -1.546912               | 4.773981  | -0.960202 |
| 38               | 1                | 0              | 2.378281                | 3.241048  | -1.702491 |
| 39               | 1                | 0              | 0.849458                | 5.217103  | -1.362008 |
| 40               | 1                | 0              | -0.625632               | -4.256121 | 0.061315  |
| 41               | 1                | 0              | 2.251324                | -3.246035 | 0.206166  |
| 42               | 1                | 0              | 1.631776                | -4.837366 | 0.654511  |
| 43               | 1                | 0              | 1.170542                | -3.410150 | 1.604357  |
| 44               | 1                | 0              | 1.233437                | -3.402465 | -2.205421 |

|    |   |   |           |           |           |
|----|---|---|-----------|-----------|-----------|
| 45 | 1 | 0 | -0.429913 | -3.987343 | -2.402519 |
| 46 | 1 | 0 | 0.819970  | -5.083081 | -1.775192 |
| 47 | 1 | 0 | -2.370639 | -3.467317 | 1.226695  |
| 48 | 1 | 0 | -3.660828 | -2.488930 | 0.511584  |
| 49 | 1 | 0 | -2.813553 | -3.683799 | -0.485167 |
| 50 | 1 | 0 | 2.960808  | 1.429708  | 2.331817  |
| 51 | 1 | 0 | 5.248232  | 2.207170  | 2.837918  |
| 52 | 1 | 0 | 7.181864  | 1.367066  | 1.504378  |
| 53 | 1 | 0 | 6.778542  | -0.264543 | -0.330910 |
| 54 | 1 | 0 | 4.483236  | -1.053756 | -0.831008 |
| 55 | 6 | 0 | -2.882354 | 2.579552  | -0.791826 |
| 56 | 1 | 0 | -3.301579 | 2.471250  | 0.211024  |
| 57 | 1 | 0 | -3.293660 | 3.500007  | -1.218469 |
| 58 | 1 | 0 | -3.253551 | 1.749173  | -1.393994 |
| 59 | 1 | 0 | -6.705948 | 0.975100  | 1.932875  |

Compound 1a TS180

Method: b3lyp/6-31g(d) EmpiricalDispersion=GD3 opt(ts,noeigentest,addredun)

SCF Done: E(RB3LYP) = -1268.64162237 A.U. after 1 cycles

Lowest frequency = -59.8857

Zero-point correction= 0.496202  
(Hartree/Particle)  
Thermal correction to Energy= 0.523192  
Thermal correction to Enthalpy= 0.524136  
Thermal correction to Gibbs Free Energy= 0.438009  
Sum of electronic and zero-point Energies= -1268.145421  
Sum of electronic and thermal Energies= -1268.118431  
Sum of electronic and thermal Enthalpies= -1268.117487  
Sum of electronic and thermal Free Energies= -1268.203614

Standard orientation:

| Center<br>Number | Atomic<br>Number | Atomic<br>Type | Coordinates (Angstroms) |           |           |
|------------------|------------------|----------------|-------------------------|-----------|-----------|
|                  |                  |                | X                       | Y         | Z         |
| 1                | 6                | 0              | -0.128633               | -2.009529 | -0.403391 |
| 2                | 6                | 0              | 0.263415                | -0.691713 | -0.591325 |
| 3                | 6                | 0              | -0.881453               | 0.183270  | -0.390648 |
| 4                | 6                | 0              | -1.925889               | -0.692291 | -0.022746 |
| 5                | 7                | 0              | -1.457923               | -1.995987 | -0.057696 |
| 6                | 6                | 0              | -3.306603               | -0.471952 | 0.476842  |
| 7                | 6                | 0              | -3.510337               | 0.048606  | 1.764438  |
| 8                | 6                | 0              | -4.427594               | -0.820914 | -0.294312 |
| 9                | 6                | 0              | -4.800048               | 0.232981  | 2.260812  |
| 10               | 6                | 0              | -5.718392               | -0.642236 | 0.204679  |
| 11               | 6                | 0              | -5.907851               | -0.111964 | 1.482604  |
| 12               | 6                | 0              | -1.073330               | 1.660295  | -0.626865 |
| 13               | 6                | 0              | -0.077129               | 2.638893  | -0.928755 |
| 14               | 6                | 0              | -2.403740               | 2.146967  | -0.588507 |
| 15               | 6                | 0              | -0.451132               | 3.991391  | -1.027326 |
| 16               | 6                | 0              | -2.751277               | 3.486076  | -0.702277 |
| 17               | 6                | 0              | -1.758031               | 4.439586  | -0.895353 |
| 18               | 6                | 0              | 1.732259                | -0.455839 | -0.755273 |
| 19               | 8                | 0              | 2.364238                | -0.700966 | -1.778636 |
| 20               | 6                | 0              | 0.631070                | -3.308604 | -0.583369 |
| 21               | 6                | 0              | 1.965949                | -3.382000 | 0.185329  |
| 22               | 6                | 0              | 0.838539                | -3.609883 | -2.083235 |

|    |   |   |           |           |           |
|----|---|---|-----------|-----------|-----------|
| 23 | 7 | 0 | 2.321928  | -0.066610 | 0.428527  |
| 24 | 6 | 0 | 3.669203  | 0.237869  | 0.702075  |
| 25 | 1 | 0 | 1.674361  | 0.072524  | 1.192756  |
| 26 | 6 | 0 | -2.219401 | -3.183595 | 0.312831  |
| 27 | 6 | 0 | 3.976910  | 0.683698  | 1.998461  |
| 28 | 6 | 0 | 5.286965  | 1.002448  | 2.342754  |
| 29 | 6 | 0 | 6.311275  | 0.884365  | 1.400563  |
| 30 | 6 | 0 | 6.002888  | 0.443885  | 0.112949  |
| 31 | 6 | 0 | 4.695376  | 0.118146  | -0.249012 |
| 32 | 1 | 0 | -2.646166 | 0.322982  | 2.362277  |
| 33 | 1 | 0 | -4.277098 | -1.218432 | -1.294485 |
| 34 | 1 | 0 | -4.941045 | 0.644076  | 3.256850  |
| 35 | 1 | 0 | -6.575383 | -0.911664 | -0.406838 |
| 36 | 1 | 0 | -3.218824 | 1.453325  | -0.483551 |
| 37 | 1 | 0 | 0.332183  | 4.715439  | -1.238262 |
| 38 | 1 | 0 | -3.799561 | 3.769069  | -0.651618 |
| 39 | 1 | 0 | -1.993173 | 5.497139  | -0.979723 |
| 40 | 1 | 0 | 0.003962  | -4.108674 | -0.175030 |
| 41 | 1 | 0 | 2.724978  | -2.731036 | -0.253563 |
| 42 | 1 | 0 | 2.350216  | -4.407745 | 0.146465  |
| 43 | 1 | 0 | 1.839246  | -3.104930 | 1.237559  |
| 44 | 1 | 0 | 1.451479  | -2.828150 | -2.539258 |
| 45 | 1 | 0 | -0.120661 | -3.645648 | -2.612771 |
| 46 | 1 | 0 | 1.338688  | -4.577442 | -2.213521 |
| 47 | 1 | 0 | -1.733153 | -3.709270 | 1.140288  |
| 48 | 1 | 0 | -3.217451 | -2.889582 | 0.629673  |
| 49 | 1 | 0 | -2.308786 | -3.866373 | -0.538010 |
| 50 | 1 | 0 | 3.182803  | 0.780180  | 2.736595  |
| 51 | 1 | 0 | 5.505294  | 1.345746  | 3.350450  |
| 52 | 1 | 0 | 7.334294  | 1.133334  | 1.667539  |
| 53 | 1 | 0 | 6.790109  | 0.348867  | -0.630420 |
| 54 | 1 | 0 | 4.457309  | -0.221399 | -1.246559 |
| 55 | 6 | 0 | 1.381070  | 2.377193  | -1.226182 |
| 56 | 1 | 0 | 1.520100  | 1.548196  | -1.920607 |
| 57 | 1 | 0 | 1.822530  | 3.259968  | -1.698064 |
| 58 | 1 | 0 | 1.970184  | 2.172506  | -0.329227 |
| 59 | 1 | 0 | -6.912854 | 0.032006  | 1.869763  |

-----

Compound 1a GS

1Method: b3lyp/6-31g(d) EmpiricalDispersion=GD3 opt freq

SCF Done: E(RB3LYP) = -1383.01042777 A.U. after 1 cycles

Lowest frequency = 18.9362

Zero-point correction= 0.515376  
(Hartree/Particle)  
Thermal correction to Energy= 0.544319  
Thermal correction to Enthalpy= 0.545264  
Thermal correction to Gibbs Free Energy= 0.454666  
Sum of electronic and zero-point Energies= -1382.495052  
Sum of electronic and thermal Energies= -1382.466108  
Sum of electronic and thermal Enthalpies= -1382.465164  
Sum of electronic and thermal Free Energies= -1382.555762

Standard orientation:

-----

| Center | Atomic | Atomic | Coordinates (Angstroms) |   |   |
|--------|--------|--------|-------------------------|---|---|
| Number | Number | Type   | X                       | Y | Z |

-----

|    |   |   |           |           |           |
|----|---|---|-----------|-----------|-----------|
| 1  | 6 | 0 | -3.426108 | -0.588040 | -0.111206 |
| 2  | 6 | 0 | -5.428140 | -2.566738 | -0.190664 |
| 3  | 6 | 0 | -2.348203 | 0.413340  | -0.084601 |
| 4  | 6 | 0 | 3.225040  | 0.607521  | -0.803090 |
| 5  | 7 | 0 | -2.559491 | 1.784393  | 0.038370  |
| 6  | 6 | 0 | -0.981608 | 0.206366  | -0.171498 |
| 7  | 6 | 0 | -0.348141 | 1.497587  | -0.099656 |
| 8  | 6 | 0 | 1.112759  | 1.762965  | -0.097918 |
| 9  | 8 | 0 | 1.629454  | 2.678951  | 0.544163  |
| 10 | 6 | 0 | -1.354136 | 2.454752  | 0.030405  |
| 11 | 6 | 0 | -3.848453 | 2.409547  | 0.315300  |
| 12 | 1 | 0 | -3.760307 | 3.094115  | 1.162498  |
| 13 | 1 | 0 | -4.570555 | 1.635092  | 0.570650  |
| 14 | 6 | 0 | -1.300860 | 3.961343  | 0.144960  |
| 15 | 1 | 0 | -2.314627 | 4.334693  | -0.044675 |
| 16 | 6 | 0 | -0.397782 | 4.612933  | -0.919231 |
| 17 | 1 | 0 | -0.494468 | 5.703603  | -0.864245 |
| 18 | 1 | 0 | 0.650085  | 4.356176  | -0.756479 |
| 19 | 1 | 0 | -0.686056 | 4.295079  | -1.927563 |
| 20 | 6 | 0 | -0.900582 | 4.396321  | 1.569850  |
| 21 | 1 | 0 | -1.589988 | 3.986434  | 2.318346  |
| 22 | 1 | 0 | 0.106810  | 4.036918  | 1.791105  |
| 23 | 1 | 0 | -0.918022 | 5.489718  | 1.653297  |
| 24 | 6 | 0 | -4.535126 | -0.456462 | -0.965777 |
| 25 | 1 | 0 | -4.603326 | 0.407099  | -1.622099 |
| 26 | 6 | 0 | -5.530375 | -1.432979 | -0.998981 |
| 27 | 1 | 0 | -6.379363 | -1.313593 | -1.666981 |
| 28 | 6 | 0 | -4.324450 | -2.715355 | 0.653215  |
| 29 | 1 | 0 | -4.236189 | -3.595042 | 1.285102  |
| 30 | 6 | 0 | -3.336386 | -1.734409 | 0.697938  |
| 31 | 1 | 0 | -2.482747 | -1.847054 | 1.359027  |
| 32 | 6 | 0 | 3.650590  | -0.639380 | -1.291238 |
| 33 | 1 | 0 | 2.916714  | -1.345632 | -1.673607 |
| 34 | 6 | 0 | 4.998872  | -0.982307 | -1.261459 |
| 35 | 1 | 0 | 5.310203  | -1.952985 | -1.638676 |
| 36 | 6 | 0 | 5.941968  | -0.092498 | -0.741968 |
| 37 | 1 | 0 | 6.994484  | -0.360663 | -0.715870 |
| 38 | 6 | 0 | 5.515165  | 1.144605  | -0.256643 |
| 39 | 1 | 0 | 6.239181  | 1.846763  | 0.149029  |
| 40 | 6 | 0 | 4.168382  | 1.507860  | -0.285409 |
| 41 | 1 | 0 | 3.836850  | 2.464388  | 0.092601  |
| 42 | 6 | 0 | -0.328686 | -1.112650 | -0.354405 |
| 43 | 6 | 0 | 0.588779  | -1.633780 | 0.621111  |
| 44 | 6 | 0 | -0.584118 | -1.846065 | -1.501922 |
| 45 | 6 | 0 | 0.888791  | -0.949578 | 1.830116  |
| 46 | 6 | 0 | 1.243026  | -2.883704 | 0.362841  |
| 47 | 6 | 0 | 0.045658  | -3.089715 | -1.740563 |
| 48 | 1 | 0 | -1.282271 | -1.447662 | -2.232216 |
| 49 | 6 | 0 | 1.804261  | -1.459060 | 2.723689  |
| 50 | 1 | 0 | 0.394250  | -0.006875 | 2.037836  |
| 51 | 6 | 0 | 2.180570  | -3.381009 | 1.307220  |
| 52 | 6 | 0 | 0.947173  | -3.593558 | -0.832100 |
| 53 | 1 | 0 | -0.179730 | -3.636091 | -2.652239 |
| 54 | 6 | 0 | 2.461383  | -2.684102 | 2.459663  |
| 55 | 1 | 0 | 2.026817  | -0.914607 | 3.637053  |
| 56 | 1 | 0 | 2.678104  | -4.325224 | 1.098244  |
| 57 | 1 | 0 | 1.448172  | -4.541090 | -1.015870 |
| 58 | 1 | 0 | 3.186963  | -3.071464 | 3.169580  |
| 59 | 7 | 0 | 1.844563  | 0.882240  | -0.866559 |

|    |   |   |           |           |           |
|----|---|---|-----------|-----------|-----------|
| 60 | 1 | 0 | 1.303193  | 0.173600  | -1.344169 |
| 61 | 1 | 0 | -4.220147 | 2.963956  | -0.553355 |
| 62 | 1 | 0 | -6.200765 | -3.330186 | -0.220182 |

-----

Compound 1a GS2

Method: b3lyp/6-31g(d) EmpiricalDispersion=GD3 opt freq

SCF Done: E(RB3LYP) = -1383.00896446 A.U. after 1 cycles

Lowest frequency = 18.2209

|                                              |              |
|----------------------------------------------|--------------|
| Zero-point correction=                       | 0.515168     |
| (Hartree/Particle)                           |              |
| Thermal correction to Energy=                | 0.544250     |
| Thermal correction to Enthalpy=              | 0.545194     |
| Thermal correction to Gibbs Free Energy=     | 0.453882     |
| Sum of electronic and zero-point Energies=   | -1382.493797 |
| Sum of electronic and thermal Energies=      | -1382.464715 |
| Sum of electronic and thermal Enthalpies=    | -1382.463771 |
| Sum of electronic and thermal Free Energies= | -1382.555083 |

Standard orientation:

| Center<br>Number | Atomic<br>Number | Atomic<br>Type | Coordinates (Angstroms) |           |           |
|------------------|------------------|----------------|-------------------------|-----------|-----------|
|                  |                  |                | X                       | Y         | Z         |
| 1                | 6                | 0              | -3.319192               | -0.803042 | -0.107846 |
| 2                | 6                | 0              | -5.214524               | -2.885190 | -0.167532 |
| 3                | 6                | 0              | -2.295623               | 0.253942  | -0.091990 |
| 4                | 6                | 0              | 3.282115                | 0.836522  | -0.789099 |
| 5                | 7                | 0              | -2.583708               | 1.612050  | 0.043648  |
| 6                | 6                | 0              | -0.920998               | 0.118991  | -0.191022 |
| 7                | 6                | 0              | -0.361932               | 1.441878  | -0.117902 |
| 8                | 6                | 0              | 1.069894                | 1.829789  | -0.139119 |
| 9                | 8                | 0              | 1.493422                | 2.835086  | 0.435262  |
| 10               | 6                | 0              | -1.415227               | 2.343647  | 0.025934  |
| 11               | 6                | 0              | -3.914422               | 2.138576  | 0.327429  |
| 12               | 1                | 0              | -3.844737               | 2.947732  | 1.053981  |
| 13               | 1                | 0              | -4.528676               | 1.343374  | 0.750312  |
| 14               | 6                | 0              | -1.321947               | 3.847645  | 0.138767  |
| 15               | 1                | 0              | -0.311430               | 4.080104  | -0.205038 |
| 16               | 6                | 0              | -1.376192               | 4.316788  | 1.606645  |
| 17               | 1                | 0              | -1.232238               | 5.402427  | 1.661149  |
| 18               | 1                | 0              | -2.334765               | 4.084096  | 2.086213  |
| 19               | 1                | 0              | -0.575907               | 3.835045  | 2.175237  |
| 20               | 6                | 0              | -2.293868               | 4.630036  | -0.765714 |
| 21               | 1                | 0              | -2.299010               | 4.228639  | -1.785432 |
| 22               | 1                | 0              | -3.323174               | 4.629864  | -0.394806 |
| 23               | 1                | 0              | -1.974008               | 5.676820  | -0.818198 |
| 24               | 6                | 0              | -4.452048               | -0.722267 | -0.936935 |
| 25               | 1                | 0              | -4.581686               | 0.143421  | -1.580687 |
| 26               | 6                | 0              | -5.393997               | -1.750293 | -0.960738 |
| 27               | 1                | 0              | -6.262337               | -1.669486 | -1.609374 |
| 28               | 6                | 0              | -4.087329               | -2.982606 | 0.652300  |
| 29               | 1                | 0              | -3.939337               | -3.862115 | 1.273182  |
| 30               | 6                | 0              | -3.152209               | -1.950702 | 0.687451  |
| 31               | 1                | 0              | -2.281133               | -2.023866 | 1.331062  |
| 32               | 6                | 0              | 3.826358                | -0.384515 | -1.222438 |
| 33               | 1                | 0              | 3.163472                | -1.177204 | -1.562992 |
| 34               | 6                | 0              | 5.202235                | -0.590371 | -1.193332 |

|    |   |   |           |           |           |
|----|---|---|-----------|-----------|-----------|
| 35 | 1 | 0 | 5.605716  | -1.542414 | -1.528446 |
| 36 | 6 | 0 | 6.056265  | 0.412472  | -0.728394 |
| 37 | 1 | 0 | 7.130433  | 0.251549  | -0.703028 |
| 38 | 6 | 0 | 5.511924  | 1.623081  | -0.296788 |
| 39 | 1 | 0 | 6.165533  | 2.412327  | 0.066187  |
| 40 | 6 | 0 | 4.135519  | 1.849604  | -0.325950 |
| 41 | 1 | 0 | 3.713125  | 2.786104  | 0.009374  |
| 42 | 6 | 0 | -0.197799 | -1.161617 | -0.381082 |
| 43 | 6 | 0 | 0.740198  | -1.640174 | 0.596880  |
| 44 | 6 | 0 | -0.407192 | -1.899562 | -1.534894 |
| 45 | 6 | 0 | 0.996845  | -0.947950 | 1.811294  |
| 46 | 6 | 0 | 1.461044  | -2.852158 | 0.335130  |
| 47 | 6 | 0 | 0.289186  | -3.106261 | -1.777537 |
| 48 | 1 | 0 | -1.120839 | -1.533309 | -2.267001 |
| 49 | 6 | 0 | 1.931121  | -1.414899 | 2.708550  |
| 50 | 1 | 0 | 0.451847  | -0.033608 | 2.019790  |
| 51 | 6 | 0 | 2.416859  | -3.305909 | 1.283332  |
| 52 | 6 | 0 | 1.210415  | -3.568203 | -0.866484 |
| 53 | 1 | 0 | 0.099026  | -3.657372 | -2.694345 |
| 54 | 6 | 0 | 2.652673  | -2.602740 | 2.442053  |
| 55 | 1 | 0 | 2.119032  | -0.865580 | 3.626791  |
| 56 | 1 | 0 | 2.964228  | -4.221714 | 1.072502  |
| 57 | 1 | 0 | 1.761555  | -4.486872 | -1.053239 |
| 58 | 1 | 0 | 3.392179  | -2.956534 | 3.155110  |
| 59 | 7 | 0 | 1.881550  | 0.969156  | -0.848917 |
| 60 | 1 | 0 | 1.408962  | 0.186270  | -1.281410 |
| 61 | 1 | 0 | -4.401140 | 2.514617  | -0.578186 |
| 62 | 1 | 0 | -5.945880 | -3.688505 | -0.189714 |

Compound 1a GS3

Method: b3lyp/6-31g(d) EmpiricalDispersion=GD3 opt freq

SCF Done: E(RB3LYP) = -1383.00864726 A.U. after 1 cycles

Lowest frequency = 18.1531

Zero-point correction= 0.515088  
(Hartree/Particle)  
Thermal correction to Energy= 0.544168  
Thermal correction to Enthalpy= 0.545113  
Thermal correction to Gibbs Free Energy= 0.453596  
Sum of electronic and zero-point Energies= -1382.493559  
Sum of electronic and thermal Energies= -1382.464479  
Sum of electronic and thermal Enthalpies= -1382.463535  
Sum of electronic and thermal Free Energies= -1382.555051

Standard orientation:

| Center<br>Number | Atomic<br>Number | Atomic<br>Type | Coordinates (Angstroms) |           |           |
|------------------|------------------|----------------|-------------------------|-----------|-----------|
|                  |                  |                | X                       | Y         | Z         |
| 1                | 6                | 0              | -0.526480               | 2.754864  | 0.164598  |
| 2                | 6                | 0              | 0.248586                | 1.622333  | -0.088010 |
| 3                | 6                | 0              | -0.649607               | 0.524511  | -0.327624 |
| 4                | 6                | 0              | -1.940525               | 1.013820  | -0.210421 |
| 5                | 7                | 0              | -1.849106               | 2.371025  | 0.087154  |
| 6                | 6                | 0              | -3.207805               | 0.275699  | -0.322917 |
| 7                | 6                | 0              | -4.206755               | 0.379614  | 0.662139  |
| 8                | 6                | 0              | -3.415209               | -0.609399 | -1.394820 |
| 9                | 6                | 0              | -5.381022               | -0.366102 | 0.569912  |

|    |   |   |           |           |           |
|----|---|---|-----------|-----------|-----------|
| 10 | 6 | 0 | -4.583086 | -1.364735 | -1.477413 |
| 11 | 6 | 0 | -5.573085 | -1.242837 | -0.499644 |
| 12 | 6 | 0 | 1.733258  | 1.575784  | -0.112821 |
| 13 | 8 | 0 | 2.431309  | 2.520460  | -0.485421 |
| 14 | 6 | 0 | -0.148757 | 4.183106  | 0.486966  |
| 15 | 6 | 0 | 0.321037  | 4.934519  | -0.775425 |
| 16 | 6 | 0 | 0.884141  | 4.287742  | 1.625326  |
| 17 | 7 | 0 | 2.264949  | 0.381616  | 0.326273  |
| 18 | 6 | 0 | 3.582505  | -0.098908 | 0.202643  |
| 19 | 1 | 0 | 1.592456  | -0.318908 | 0.606534  |
| 20 | 6 | 0 | -2.979310 | 3.293391  | 0.126455  |
| 21 | 6 | 0 | 4.689344  | 0.728501  | -0.042474 |
| 22 | 6 | 0 | 5.959048  | 0.158778  | -0.143042 |
| 23 | 6 | 0 | 6.150235  | -1.215955 | 0.003996  |
| 24 | 6 | 0 | 5.045270  | -2.034355 | 0.250654  |
| 25 | 6 | 0 | 3.770475  | -1.484470 | 0.345926  |
| 26 | 1 | 0 | -4.047556 | 1.031947  | 1.516727  |
| 27 | 1 | 0 | -2.648699 | -0.703388 | -2.157026 |
| 28 | 1 | 0 | -6.139697 | -0.273084 | 1.342555  |
| 29 | 1 | 0 | -4.723068 | -2.046289 | -2.312159 |
| 30 | 1 | 0 | -1.055276 | 4.681207  | 0.851518  |
| 31 | 1 | 0 | 1.224031  | 4.461398  | -1.167210 |
| 32 | 1 | 0 | 0.539828  | 5.982039  | -0.535250 |
| 33 | 1 | 0 | -0.449243 | 4.917432  | -1.556294 |
| 34 | 1 | 0 | 1.849858  | 3.883044  | 1.318806  |
| 35 | 1 | 0 | 0.543027  | 3.748886  | 2.516547  |
| 36 | 1 | 0 | 1.025750  | 5.340585  | 1.896354  |
| 37 | 1 | 0 | -2.776208 | 4.164157  | -0.501852 |
| 38 | 1 | 0 | -3.863127 | 2.787113  | -0.259577 |
| 39 | 1 | 0 | -3.186050 | 3.631447  | 1.147693  |
| 40 | 1 | 0 | 4.540970  | 1.792700  | -0.157246 |
| 41 | 1 | 0 | 6.810484  | 0.806829  | -0.335017 |
| 42 | 1 | 0 | 7.145452  | -1.644804 | -0.072985 |
| 43 | 1 | 0 | 5.172390  | -3.107932 | 0.363450  |
| 44 | 1 | 0 | 2.909820  | -2.128110 | 0.517184  |
| 45 | 6 | 0 | -0.271354 | -0.868744 | -0.670080 |
| 46 | 6 | 0 | -0.517613 | -1.956021 | 0.234657  |
| 47 | 6 | 0 | 0.392276  | -1.117233 | -1.860618 |
| 48 | 6 | 0 | -1.149338 | -1.775706 | 1.496539  |
| 49 | 6 | 0 | -0.089010 | -3.277089 | -0.131336 |
| 50 | 6 | 0 | 0.820727  | -2.416211 | -2.211486 |
| 51 | 1 | 0 | 0.594994  | -0.285650 | -2.529481 |
| 52 | 6 | 0 | -1.365865 | -2.841320 | 2.340418  |
| 53 | 1 | 0 | -1.463912 | -0.778802 | 1.783869  |
| 54 | 6 | 0 | -0.332966 | -4.354807 | 0.763095  |
| 55 | 6 | 0 | 0.579881  | -3.476268 | -1.367596 |
| 56 | 1 | 0 | 1.342917  | -2.570517 | -3.151413 |
| 57 | 6 | 0 | -0.959127 | -4.146024 | 1.970068  |
| 58 | 1 | 0 | -1.851924 | -2.681404 | 3.298995  |
| 59 | 1 | 0 | -0.009893 | -5.352407 | 0.474551  |
| 60 | 1 | 0 | 0.905424  | -4.479560 | -1.631819 |
| 61 | 1 | 0 | -1.138391 | -4.979252 | 2.644117  |
| 62 | 1 | 0 | -6.484937 | -1.829704 | -0.568165 |

-----

Compound 1a TS0

Method: b3lyp/6-31g(d) EmpiricalDispersion=GD3 opt(ts,noeigentest,addredun)

SCF Done: E(RB3LYP) = -1382.97093423 A.U. after 1 cycles

Lowest frequency = -32.3708

Zero-point correction= 0.514846  
 (Hartree/Particle)  
 Thermal correction to Energy= 0.543006  
 Thermal correction to Enthalpy= 0.543950  
 Thermal correction to Gibbs Free Energy= 0.455468  
 Sum of electronic and zero-point Energies= -1382.456088  
 Sum of electronic and thermal Energies= -1382.427928  
 Sum of electronic and thermal Enthalpies= -1382.426984  
 Sum of electronic and thermal Free Energies= -1382.515466

Standard orientation:

| Center<br>Number | Atomic<br>Number | Atomic<br>Type | Coordinates (Angstroms) |           |           |
|------------------|------------------|----------------|-------------------------|-----------|-----------|
|                  |                  |                | X                       | Y         | Z         |
| 1                | 6                | 0              | 0.211196                | -2.635397 | -0.234668 |
| 2                | 6                | 0              | 0.633668                | -1.344794 | -0.491641 |
| 3                | 6                | 0              | -0.511887               | -0.444240 | -0.450868 |
| 4                | 6                | 0              | -1.595512               | -1.263496 | -0.081036 |
| 5                | 7                | 0              | -1.140132               | -2.576332 | 0.016327  |
| 6                | 6                | 0              | -2.979672               | -0.990022 | 0.369832  |
| 7                | 6                | 0              | -3.193086               | -0.308434 | 1.576762  |
| 8                | 6                | 0              | -4.094274               | -1.436549 | -0.359751 |
| 9                | 6                | 0              | -4.486839               | -0.053876 | 2.030096  |
| 10               | 6                | 0              | -5.388629               | -1.184018 | 0.094278  |
| 11               | 6                | 0              | -5.587913               | -0.488150 | 1.289553  |
| 12               | 6                | 0              | 2.092524                | -1.027165 | -0.543456 |
| 13               | 8                | 0              | 2.865370                | -1.459291 | -1.394405 |
| 14               | 6                | 0              | 0.979826                | -3.939194 | -0.205458 |
| 15               | 6                | 0              | 2.192443                | -3.909712 | 0.746375  |
| 16               | 6                | 0              | 1.394538                | -4.363034 | -1.630160 |
| 17               | 7                | 0              | 2.502465                | -0.254911 | 0.528616  |
| 18               | 6                | 0              | 3.710826                | 0.458498  | 0.665383  |
| 19               | 1                | 0              | 1.741607                | 0.082213  | 1.104449  |
| 20               | 6                | 0              | -1.931308               | -3.722289 | 0.452017  |
| 21               | 6                | 0              | 3.709807                | 1.578660  | 1.512521  |
| 22               | 6                | 0              | 4.872526                | 2.320297  | 1.701461  |
| 23               | 6                | 0              | 6.051212                | 1.961993  | 1.043397  |
| 24               | 6                | 0              | 6.048238                | 0.851437  | 0.198060  |
| 25               | 6                | 0              | 4.893698                | 0.092369  | 0.004602  |
| 26               | 1                | 0              | -2.334290               | 0.040941  | 2.141718  |
| 27               | 1                | 0              | -3.936402               | -1.960961 | -1.298556 |
| 28               | 1                | 0              | -4.635145               | 0.488469  | 2.959812  |
| 29               | 1                | 0              | -6.240942               | -1.525025 | -0.487258 |
| 30               | 1                | 0              | 0.304778                | -4.711347 | 0.179157  |
| 31               | 1                | 0              | 2.978155                | -3.249152 | 0.373616  |
| 32               | 1                | 0              | 2.617620                | -4.916417 | 0.831094  |
| 33               | 1                | 0              | 1.904175                | -3.574199 | 1.748742  |
| 34               | 1                | 0              | 2.066167                | -3.616547 | -2.060817 |
| 35               | 1                | 0              | 0.518228                | -4.455119 | -2.282414 |
| 36               | 1                | 0              | 1.905864                | -5.333087 | -1.604447 |
| 37               | 1                | 0              | -1.492294               | -4.172983 | 1.347276  |
| 38               | 1                | 0              | -2.941193               | -3.397851 | 0.690656  |
| 39               | 1                | 0              | -1.983239               | -4.478474 | -0.337626 |
| 40               | 1                | 0              | 2.788849                | 1.873688  | 2.010997  |
| 41               | 1                | 0              | 4.852825                | 3.184887  | 2.359644  |
| 42               | 1                | 0              | 6.958513                | 2.541726  | 1.187496  |
| 43               | 1                | 0              | 6.958734                | 0.562296  | -0.320442 |



|    |   |   |           |           |           |
|----|---|---|-----------|-----------|-----------|
| 44 | 1 | 0 | 4.891730  | -0.764261 | -0.654055 |
| 45 | 6 | 0 | -0.404037 | 1.012705  | -0.776356 |
| 46 | 6 | 0 | -1.435778 | 2.030484  | -0.642378 |
| 47 | 6 | 0 | 0.834591  | 1.484909  | -1.215837 |
| 48 | 6 | 0 | -2.828997 | 1.775567  | -0.713711 |
| 49 | 6 | 0 | -1.048339 | 3.416839  | -0.559109 |
| 50 | 6 | 0 | 1.195791  | 2.847647  | -1.210549 |
| 51 | 1 | 0 | 1.584054  | 0.792827  | -1.568794 |
| 52 | 6 | 0 | -3.772567 | 2.767060  | -0.546107 |
| 53 | 1 | 0 | -3.166207 | 0.786415  | -0.967419 |
| 54 | 6 | 0 | -2.037328 | 4.412314  | -0.332415 |
| 55 | 6 | 0 | 0.297318  | 3.797718  | -0.795776 |
| 56 | 1 | 0 | 2.205008  | 3.121493  | -1.504139 |
| 57 | 6 | 0 | -3.376342 | 4.098642  | -0.300628 |
| 58 | 1 | 0 | -4.826759 | 2.514639  | -0.620296 |
| 59 | 1 | 0 | -1.710595 | 5.444752  | -0.230039 |
| 60 | 1 | 0 | 0.575012  | 4.846213  | -0.722377 |
| 61 | 1 | 0 | -4.121616 | 4.873719  | -0.142936 |
| 62 | 1 | 0 | -6.596101 | -0.286470 | 1.640982  |

Compound 1a TS180

Method: b3lyp/6-31g(d) EmpiricalDispersion=GD3 opt(ts,noeigentest,addredun)

SCF Done: E(RB3LYP) = -1382.97069885 A.U. after 1 cycles

Lowest frequency = -29.0685

Zero-point correction= 0.514838  
(Hartree/Particle)  
Thermal correction to Energy= 0.542979  
Thermal correction to Enthalpy= 0.543923  
Thermal correction to Gibbs Free Energy= 0.455785  
Sum of electronic and zero-point Energies= -1382.455861  
Sum of electronic and thermal Energies= -1382.427720  
Sum of electronic and thermal Enthalpies= -1382.426775  
Sum of electronic and thermal Free Energies= -1382.514914

Standard orientation:

| Center<br>Number | Atomic<br>Number | Atomic<br>Type | Coordinates (Angstroms) |           |           |
|------------------|------------------|----------------|-------------------------|-----------|-----------|
|                  |                  |                | X                       | Y         | Z         |
| 1                | 6                | 0              | -0.657137               | -2.437983 | -0.231298 |
| 2                | 6                | 0              | -0.027640               | -1.232031 | -0.498505 |
| 3                | 6                | 0              | -1.006052               | -0.161927 | -0.432801 |
| 4                | 6                | 0              | -2.204040               | -0.799645 | -0.048302 |
| 5                | 7                | 0              | -1.977712               | -2.163117 | 0.041438  |
| 6                | 6                | 0              | -3.512060               | -0.253469 | 0.384271  |
| 7                | 6                | 0              | -3.585926               | 0.555357  | 1.529837  |
| 8                | 6                | 0              | -4.697309               | -0.542090 | -0.312145 |
| 9                | 6                | 0              | -4.807176               | 1.070587  | 1.958936  |
| 10               | 6                | 0              | -5.922120               | -0.033319 | 0.122769  |
| 11               | 6                | 0              | -5.980099               | 0.777185  | 1.257822  |
| 12               | 6                | 0              | 1.459972                | -1.234937 | -0.651415 |
| 13               | 8                | 0              | 2.047954                | -1.627974 | -1.655120 |
| 14               | 6                | 0              | -0.132803               | -3.857619 | -0.287870 |
| 15               | 6                | 0              | 1.159448                | -4.088142 | 0.520202  |
| 16               | 6                | 0              | 0.046390                | -4.304341 | -1.755043 |
| 17               | 7                | 0              | 2.103495                | -0.839212 | 0.503603  |
| 18               | 6                | 0              | 3.467576                | -0.542131 | 0.691771  |

|    |   |   |           |           |           |
|----|---|---|-----------|-----------|-----------|
| 19 | 1 | 0 | 1.482340  | -0.493720 | 1.223294  |
| 20 | 6 | 0 | -2.941337 | -3.160417 | 0.493175  |
| 21 | 6 | 0 | 3.818809  | 0.163181  | 1.854291  |
| 22 | 6 | 0 | 5.145260  | 0.503403  | 2.099352  |
| 23 | 6 | 0 | 6.143204  | 0.150451  | 1.187698  |
| 24 | 6 | 0 | 5.792188  | -0.550162 | 0.033254  |
| 25 | 6 | 0 | 4.467093  | -0.905052 | -0.224660 |
| 26 | 1 | 0 | -2.671283 | 0.788658  | 2.066346  |
| 27 | 1 | 0 | -4.648816 | -1.155204 | -1.208424 |
| 28 | 1 | 0 | -4.844999 | 1.699803  | 2.844152  |
| 29 | 1 | 0 | -6.828667 | -0.263807 | -0.430505 |
| 30 | 1 | 0 | -0.893634 | -4.505842 | 0.161002  |
| 31 | 1 | 0 | 2.019790  | -3.601267 | 0.055771  |
| 32 | 1 | 0 | 1.373409  | -5.162124 | 0.565061  |
| 33 | 1 | 0 | 1.064280  | -3.714561 | 1.545389  |
| 34 | 1 | 0 | 0.791367  | -3.673736 | -2.247909 |
| 35 | 1 | 0 | -0.894998 | -4.218470 | -2.310055 |
| 36 | 1 | 0 | 0.377295  | -5.349174 | -1.799888 |
| 37 | 1 | 0 | -2.560301 | -3.690764 | 1.371022  |
| 38 | 1 | 0 | -3.871811 | -2.667088 | 0.765289  |
| 39 | 1 | 0 | -3.147374 | -3.887263 | -0.299086 |
| 40 | 1 | 0 | 3.043599  | 0.457271  | 2.558779  |
| 41 | 1 | 0 | 5.396858  | 1.052895  | 3.002486  |
| 42 | 1 | 0 | 7.178836  | 0.418729  | 1.375844  |
| 43 | 1 | 0 | 6.558370  | -0.831795 | -0.684387 |
| 44 | 1 | 0 | 4.196746  | -1.443141 | -1.121580 |
| 45 | 6 | 0 | -0.950560 | 1.307797  | -0.719944 |
| 46 | 6 | 0 | 0.221111  | 2.166664  | -0.681572 |
| 47 | 6 | 0 | -2.160950 | 1.957291  | -0.963379 |
| 48 | 6 | 0 | 1.551741  | 1.733001  | -0.917091 |
| 49 | 6 | 0 | 0.042337  | 3.584949  | -0.492250 |
| 50 | 6 | 0 | -2.321574 | 3.355103  | -0.883895 |
| 51 | 1 | 0 | -3.043424 | 1.373962  | -1.177689 |
| 52 | 6 | 0 | 2.639114  | 2.570003  | -0.779030 |
| 53 | 1 | 0 | 1.722352  | 0.749308  | -1.316738 |
| 54 | 6 | 0 | 1.179534  | 4.419768  | -0.315155 |
| 55 | 6 | 0 | -1.254230 | 4.155005  | -0.561504 |
| 56 | 1 | 0 | -3.309541 | 3.780099  | -1.039247 |
| 57 | 6 | 0 | 2.457832  | 3.922845  | -0.419773 |
| 58 | 1 | 0 | 3.635059  | 2.182170  | -0.972222 |
| 59 | 1 | 0 | 1.013102  | 5.478766  | -0.130209 |
| 60 | 1 | 0 | -1.371044 | 5.227153  | -0.423587 |
| 61 | 1 | 0 | 3.317072  | 4.574830  | -0.287695 |
| 62 | 1 | 0 | -6.932260 | 1.178448  | 1.593980  |

Compound 1b GS1

Method: b3lyp/6-31g(d) EmpiricalDispersion=GD3 opt freq

SCF Done: E(RB3LYP) = -1383.01042777 A.U. after 1 cycles

Lowest frequency = 18.9362

|                                            |              |
|--------------------------------------------|--------------|
| Zero-point correction=                     | 0.515376     |
| (Hartree/Particle)                         |              |
| Thermal correction to Energy=              | 0.544319     |
| Thermal correction to Enthalpy=            | 0.545264     |
| Thermal correction to Gibbs Free Energy=   | 0.454666     |
| Sum of electronic and zero-point Energies= | -1382.495052 |
| Sum of electronic and thermal Energies=    | -1382.466108 |

Sum of electronic and thermal Enthalpies= -1382.465164  
Sum of electronic and thermal Free Energies= -1382.555762

Standard orientation:

| Center<br>Number | Atomic<br>Number | Atomic<br>Type | Coordinates (Angstroms) |           |           |
|------------------|------------------|----------------|-------------------------|-----------|-----------|
|                  |                  |                | X                       | Y         | Z         |
| 1                | 6                | 0              | -3.426108               | -0.588040 | -0.111206 |
| 2                | 6                | 0              | -5.428140               | -2.566738 | -0.190664 |
| 3                | 6                | 0              | -2.348203               | 0.413340  | -0.084601 |
| 4                | 6                | 0              | 3.225040                | 0.607521  | -0.803090 |
| 5                | 7                | 0              | -2.559491               | 1.784393  | 0.038370  |
| 6                | 6                | 0              | -0.981608               | 0.206366  | -0.171498 |
| 7                | 6                | 0              | -0.348141               | 1.497587  | -0.099656 |
| 8                | 6                | 0              | 1.112759                | 1.762965  | -0.097918 |
| 9                | 8                | 0              | 1.629454                | 2.678951  | 0.544163  |
| 10               | 6                | 0              | -1.354136               | 2.454752  | 0.030405  |
| 11               | 6                | 0              | -3.848453               | 2.409547  | 0.315300  |
| 12               | 1                | 0              | -3.760307               | 3.094115  | 1.162498  |
| 13               | 1                | 0              | -4.570555               | 1.635092  | 0.570650  |
| 14               | 6                | 0              | -1.300860               | 3.961343  | 0.144960  |
| 15               | 1                | 0              | -2.314627               | 4.334693  | -0.044675 |
| 16               | 6                | 0              | -0.397782               | 4.612933  | -0.919231 |
| 17               | 1                | 0              | -0.494468               | 5.703603  | -0.864245 |
| 18               | 1                | 0              | 0.650085                | 4.356176  | -0.756479 |
| 19               | 1                | 0              | -0.686056               | 4.295079  | -1.927563 |
| 20               | 6                | 0              | -0.900582               | 4.396321  | 1.569850  |
| 21               | 1                | 0              | -1.589988               | 3.986434  | 2.318346  |
| 22               | 1                | 0              | 0.106810                | 4.036918  | 1.791105  |
| 23               | 1                | 0              | -0.918022               | 5.489718  | 1.653297  |
| 24               | 6                | 0              | -4.535126               | -0.456462 | -0.965777 |
| 25               | 1                | 0              | -4.603326               | 0.407099  | -1.622099 |
| 26               | 6                | 0              | -5.530375               | -1.432979 | -0.998981 |
| 27               | 1                | 0              | -6.379363               | -1.313593 | -1.666981 |
| 28               | 6                | 0              | -4.324450               | -2.715355 | 0.653215  |
| 29               | 1                | 0              | -4.236189               | -3.595042 | 1.285102  |
| 30               | 6                | 0              | -3.336386               | -1.734409 | 0.697938  |
| 31               | 1                | 0              | -2.482747               | -1.847054 | 1.359027  |
| 32               | 6                | 0              | 3.650590                | -0.639380 | -1.291238 |
| 33               | 1                | 0              | 2.916714                | -1.345632 | -1.673607 |
| 34               | 6                | 0              | 4.998872                | -0.982307 | -1.261459 |
| 35               | 1                | 0              | 5.310203                | -1.952985 | -1.638676 |
| 36               | 6                | 0              | 5.941968                | -0.092498 | -0.741968 |
| 37               | 1                | 0              | 6.994484                | -0.360663 | -0.715870 |
| 38               | 6                | 0              | 5.515165                | 1.144605  | -0.256643 |
| 39               | 1                | 0              | 6.239181                | 1.846763  | 0.149029  |
| 40               | 6                | 0              | 4.168382                | 1.507860  | -0.285409 |
| 41               | 1                | 0              | 3.836850                | 2.464388  | 0.092601  |
| 42               | 6                | 0              | -0.328686               | -1.112650 | -0.354405 |
| 43               | 6                | 0              | 0.588779                | -1.633780 | 0.621111  |
| 44               | 6                | 0              | -0.584118               | -1.846065 | -1.501922 |
| 45               | 6                | 0              | 0.888791                | -0.949578 | 1.830116  |
| 46               | 6                | 0              | 1.243026                | -2.883704 | 0.362841  |
| 47               | 6                | 0              | 0.045658                | -3.089715 | -1.740563 |
| 48               | 1                | 0              | -1.282271               | -1.447662 | -2.232216 |
| 49               | 6                | 0              | 1.804261                | -1.459060 | 2.723689  |
| 50               | 1                | 0              | 0.394250                | -0.006875 | 2.037836  |
| 51               | 6                | 0              | 2.180570                | -3.381009 | 1.307220  |

|    |   |   |           |           |           |
|----|---|---|-----------|-----------|-----------|
| 52 | 6 | 0 | 0.947173  | -3.593558 | -0.832100 |
| 53 | 1 | 0 | -0.179730 | -3.636091 | -2.652239 |
| 54 | 6 | 0 | 2.461383  | -2.684102 | 2.459663  |
| 55 | 1 | 0 | 2.026817  | -0.914607 | 3.637053  |
| 56 | 1 | 0 | 2.678104  | -4.325224 | 1.098244  |
| 57 | 1 | 0 | 1.448172  | -4.541090 | -1.015870 |
| 58 | 1 | 0 | 3.186963  | -3.071464 | 3.169580  |
| 59 | 7 | 0 | 1.844563  | 0.882240  | -0.866559 |
| 60 | 1 | 0 | 1.303193  | 0.173600  | -1.344169 |
| 61 | 1 | 0 | -4.220147 | 2.963956  | -0.553355 |
| 62 | 1 | 0 | -6.200765 | -3.330186 | -0.220182 |

Compound 1b GS2

Method: b3lyp/6-31g(d) EmpiricalDispersion=GD3 opt freq

SCF Done: E(RB3LYP) = -1383.00896446 A.U. after 1 cycles

Lowest frequency = 18.2209

Zero-point correction= 0.515168  
(Hartree/Particle)  
Thermal correction to Energy= 0.544250  
Thermal correction to Enthalpy= 0.545194  
Thermal correction to Gibbs Free Energy= 0.453882  
Sum of electronic and zero-point Energies= -1382.493797  
Sum of electronic and thermal Energies= -1382.464715  
Sum of electronic and thermal Enthalpies= -1382.463771  
Sum of electronic and thermal Free Energies= -1382.555083

Standard orientation:

| Center<br>Number | Atomic<br>Number | Atomic<br>Type | Coordinates (Angstroms) |           |           |
|------------------|------------------|----------------|-------------------------|-----------|-----------|
|                  |                  |                | X                       | Y         | Z         |
| 1                | 6                | 0              | -3.319192               | -0.803042 | -0.107846 |
| 2                | 6                | 0              | -5.214524               | -2.885190 | -0.167532 |
| 3                | 6                | 0              | -2.295623               | 0.253942  | -0.091990 |
| 4                | 6                | 0              | 3.282115                | 0.836522  | -0.789099 |
| 5                | 7                | 0              | -2.583708               | 1.612050  | 0.043648  |
| 6                | 6                | 0              | -0.920998               | 0.118991  | -0.191022 |
| 7                | 6                | 0              | -0.361932               | 1.441878  | -0.117902 |
| 8                | 6                | 0              | 1.069894                | 1.829789  | -0.139119 |
| 9                | 8                | 0              | 1.493422                | 2.835086  | 0.435262  |
| 10               | 6                | 0              | -1.415227               | 2.343647  | 0.025934  |
| 11               | 6                | 0              | -3.914422               | 2.138576  | 0.327429  |
| 12               | 1                | 0              | -3.844737               | 2.947732  | 1.053981  |
| 13               | 1                | 0              | -4.528676               | 1.343374  | 0.750312  |
| 14               | 6                | 0              | -1.321947               | 3.847645  | 0.138767  |
| 15               | 1                | 0              | -0.311430               | 4.080104  | -0.205038 |
| 16               | 6                | 0              | -1.376192               | 4.316788  | 1.606645  |
| 17               | 1                | 0              | -1.232238               | 5.402427  | 1.661149  |
| 18               | 1                | 0              | -2.334765               | 4.084096  | 2.086213  |
| 19               | 1                | 0              | -0.575907               | 3.835045  | 2.175237  |
| 20               | 6                | 0              | -2.293868               | 4.630036  | -0.765714 |
| 21               | 1                | 0              | -2.299010               | 4.228639  | -1.785432 |
| 22               | 1                | 0              | -3.323174               | 4.629864  | -0.394806 |
| 23               | 1                | 0              | -1.974008               | 5.676820  | -0.818198 |
| 24               | 6                | 0              | -4.452048               | -0.722267 | -0.936935 |
| 25               | 1                | 0              | -4.581686               | 0.143421  | -1.580687 |
| 26               | 6                | 0              | -5.393997               | -1.750293 | -0.960738 |

|    |   |   |           |           |           |
|----|---|---|-----------|-----------|-----------|
| 27 | 1 | 0 | -6.262337 | -1.669486 | -1.609374 |
| 28 | 6 | 0 | -4.087329 | -2.982606 | 0.652300  |
| 29 | 1 | 0 | -3.939337 | -3.862115 | 1.273182  |
| 30 | 6 | 0 | -3.152209 | -1.950702 | 0.687451  |
| 31 | 1 | 0 | -2.281133 | -2.023866 | 1.331062  |
| 32 | 6 | 0 | 3.826358  | -0.384515 | -1.222438 |
| 33 | 1 | 0 | 3.163472  | -1.177204 | -1.562992 |
| 34 | 6 | 0 | 5.202235  | -0.590371 | -1.193332 |
| 35 | 1 | 0 | 5.605716  | -1.542414 | -1.528446 |
| 36 | 6 | 0 | 6.056265  | 0.412472  | -0.728394 |
| 37 | 1 | 0 | 7.130433  | 0.251549  | -0.703028 |
| 38 | 6 | 0 | 5.511924  | 1.623081  | -0.296788 |
| 39 | 1 | 0 | 6.165533  | 2.412327  | 0.066187  |
| 40 | 6 | 0 | 4.135519  | 1.849604  | -0.325950 |
| 41 | 1 | 0 | 3.713125  | 2.786104  | 0.009374  |
| 42 | 6 | 0 | -0.197799 | -1.161617 | -0.381082 |
| 43 | 6 | 0 | 0.740198  | -1.640174 | 0.596880  |
| 44 | 6 | 0 | -0.407192 | -1.899562 | -1.534894 |
| 45 | 6 | 0 | 0.996845  | -0.947950 | 1.811294  |
| 46 | 6 | 0 | 1.461044  | -2.852158 | 0.335130  |
| 47 | 6 | 0 | 0.289186  | -3.106261 | -1.777537 |
| 48 | 1 | 0 | -1.120839 | -1.533309 | -2.267001 |
| 49 | 6 | 0 | 1.931121  | -1.414899 | 2.708550  |
| 50 | 1 | 0 | 0.451847  | -0.033608 | 2.019790  |
| 51 | 6 | 0 | 2.416859  | -3.305909 | 1.283332  |
| 52 | 6 | 0 | 1.210415  | -3.568203 | -0.866484 |
| 53 | 1 | 0 | 0.099026  | -3.657372 | -2.694345 |
| 54 | 6 | 0 | 2.652673  | -2.602740 | 2.442053  |
| 55 | 1 | 0 | 2.119032  | -0.865580 | 3.626791  |
| 56 | 1 | 0 | 2.964228  | -4.221714 | 1.072502  |
| 57 | 1 | 0 | 1.761555  | -4.486872 | -1.053239 |
| 58 | 1 | 0 | 3.392179  | -2.956534 | 3.155110  |
| 59 | 7 | 0 | 1.881550  | 0.969156  | -0.848917 |
| 60 | 1 | 0 | 1.408962  | 0.186270  | -1.281410 |
| 61 | 1 | 0 | -4.401140 | 2.514617  | -0.578186 |
| 62 | 1 | 0 | -5.945880 | -3.688505 | -0.189714 |

Compound 1b GS3

Method: b3lyp/6-31g(d) EmpiricalDispersion=GD3 opt freq

SCF Done: E(RB3LYP) = -1383.00864726 A.U. after 1 cycles

Lowest frequency = 18.1531

Zero-point correction= 0.515088  
(Hartree/Particle)  
Thermal correction to Energy= 0.544168  
Thermal correction to Enthalpy= 0.545113  
Thermal correction to Gibbs Free Energy= 0.453596  
Sum of electronic and zero-point Energies= -1382.493559  
Sum of electronic and thermal Energies= -1382.464479  
Sum of electronic and thermal Enthalpies= -1382.463535  
Sum of electronic and thermal Free Energies= -1382.555051

Standard orientation:

| Center<br>Number | Atomic<br>Number | Atomic<br>Type | Coordinates (Angstroms) |          |          |
|------------------|------------------|----------------|-------------------------|----------|----------|
|                  |                  |                | X                       | Y        | Z        |
| 1                | 6                | 0              | -0.526480               | 2.754864 | 0.164598 |

|    |   |   |           |           |           |
|----|---|---|-----------|-----------|-----------|
| 2  | 6 | 0 | 0.248586  | 1.622333  | -0.088010 |
| 3  | 6 | 0 | -0.649607 | 0.524511  | -0.327624 |
| 4  | 6 | 0 | -1.940525 | 1.013820  | -0.210421 |
| 5  | 7 | 0 | -1.849106 | 2.371025  | 0.087154  |
| 6  | 6 | 0 | -3.207805 | 0.275699  | -0.322917 |
| 7  | 6 | 0 | -4.206755 | 0.379614  | 0.662139  |
| 8  | 6 | 0 | -3.415209 | -0.609399 | -1.394820 |
| 9  | 6 | 0 | -5.381022 | -0.366102 | 0.569912  |
| 10 | 6 | 0 | -4.583086 | -1.364735 | -1.477413 |
| 11 | 6 | 0 | -5.573085 | -1.242837 | -0.499644 |
| 12 | 6 | 0 | 1.733258  | 1.575784  | -0.112821 |
| 13 | 8 | 0 | 2.431309  | 2.520460  | -0.485421 |
| 14 | 6 | 0 | -0.148757 | 4.183106  | 0.486966  |
| 15 | 6 | 0 | 0.321037  | 4.934519  | -0.775425 |
| 16 | 6 | 0 | 0.884141  | 4.287742  | 1.625326  |
| 17 | 7 | 0 | 2.264949  | 0.381616  | 0.326273  |
| 18 | 6 | 0 | 3.582505  | -0.098908 | 0.202643  |
| 19 | 1 | 0 | 1.592456  | -0.318908 | 0.606534  |
| 20 | 6 | 0 | -2.979310 | 3.293391  | 0.126455  |
| 21 | 6 | 0 | 4.689344  | 0.728501  | -0.042474 |
| 22 | 6 | 0 | 5.959048  | 0.158778  | -0.143042 |
| 23 | 6 | 0 | 6.150235  | -1.215955 | 0.003996  |
| 24 | 6 | 0 | 5.045270  | -2.034355 | 0.250654  |
| 25 | 6 | 0 | 3.770475  | -1.484470 | 0.345926  |
| 26 | 1 | 0 | -4.047556 | 1.031947  | 1.516727  |
| 27 | 1 | 0 | -2.648699 | -0.703388 | -2.157026 |
| 28 | 1 | 0 | -6.139697 | -0.273084 | 1.342555  |
| 29 | 1 | 0 | -4.723068 | -2.046289 | -2.312159 |
| 30 | 1 | 0 | -1.055276 | 4.681207  | 0.851518  |
| 31 | 1 | 0 | 1.224031  | 4.461398  | -1.167210 |
| 32 | 1 | 0 | 0.539828  | 5.982039  | -0.535250 |
| 33 | 1 | 0 | -0.449243 | 4.917432  | -1.556294 |
| 34 | 1 | 0 | 1.849858  | 3.883044  | 1.318806  |
| 35 | 1 | 0 | 0.543027  | 3.748886  | 2.516547  |
| 36 | 1 | 0 | 1.025750  | 5.340585  | 1.896354  |
| 37 | 1 | 0 | -2.776208 | 4.164157  | -0.501852 |
| 38 | 1 | 0 | -3.863127 | 2.787113  | -0.259577 |
| 39 | 1 | 0 | -3.186050 | 3.631447  | 1.147693  |
| 40 | 1 | 0 | 4.540970  | 1.792700  | -0.157246 |
| 41 | 1 | 0 | 6.810484  | 0.806829  | -0.335017 |
| 42 | 1 | 0 | 7.145452  | -1.644804 | -0.072985 |
| 43 | 1 | 0 | 5.172390  | -3.107932 | 0.363450  |
| 44 | 1 | 0 | 2.909820  | -2.128110 | 0.517184  |
| 45 | 6 | 0 | -0.271354 | -0.868744 | -0.670080 |
| 46 | 6 | 0 | -0.517613 | -1.956021 | 0.234657  |
| 47 | 6 | 0 | 0.392276  | -1.117233 | -1.860618 |
| 48 | 6 | 0 | -1.149338 | -1.775706 | 1.496539  |
| 49 | 6 | 0 | -0.089010 | -3.277089 | -0.131336 |
| 50 | 6 | 0 | 0.820727  | -2.416211 | -2.211486 |
| 51 | 1 | 0 | 0.594994  | -0.285650 | -2.529481 |
| 52 | 6 | 0 | -1.365865 | -2.841320 | 2.340418  |
| 53 | 1 | 0 | -1.463912 | -0.778802 | 1.783869  |
| 54 | 6 | 0 | -0.332966 | -4.354807 | 0.763095  |
| 55 | 6 | 0 | 0.579881  | -3.476268 | -1.367596 |
| 56 | 1 | 0 | 1.342917  | -2.570517 | -3.151413 |
| 57 | 6 | 0 | -0.959127 | -4.146024 | 1.970068  |
| 58 | 1 | 0 | -1.851924 | -2.681404 | 3.298995  |
| 59 | 1 | 0 | -0.009893 | -5.352407 | 0.474551  |
| 60 | 1 | 0 | 0.905424  | -4.479560 | -1.631819 |

|    |   |   |           |           |           |
|----|---|---|-----------|-----------|-----------|
| 61 | 1 | 0 | -1.138391 | -4.979252 | 2.644117  |
| 62 | 1 | 0 | -6.484937 | -1.829704 | -0.568165 |

Compound 1b TS0

Method: b3lyp/6-31g(d) EmpiricalDispersion=GD3 opt(ts,noeigentest,addredun)

SCF Done: E(RB3LYP) = -1382.97093423 A.U. after 1 cycles

Lowest frequency = -32.3708

|                                              |              |
|----------------------------------------------|--------------|
| Zero-point correction=                       | 0.514846     |
| (Hartree/Particle)                           |              |
| Thermal correction to Energy=                | 0.543006     |
| Thermal correction to Enthalpy=              | 0.543950     |
| Thermal correction to Gibbs Free Energy=     | 0.455468     |
| Sum of electronic and zero-point Energies=   | -1382.456088 |
| Sum of electronic and thermal Energies=      | -1382.427928 |
| Sum of electronic and thermal Enthalpies=    | -1382.426984 |
| Sum of electronic and thermal Free Energies= | -1382.515466 |

Standard orientation:

| Center<br>Number | Atomic<br>Number | Atomic<br>Type | Coordinates (Angstroms) |           |           |
|------------------|------------------|----------------|-------------------------|-----------|-----------|
|                  |                  |                | X                       | Y         | Z         |
| 1                | 6                | 0              | 0.211196                | -2.635397 | -0.234668 |
| 2                | 6                | 0              | 0.633668                | -1.344794 | -0.491641 |
| 3                | 6                | 0              | -0.511887               | -0.444240 | -0.450868 |
| 4                | 6                | 0              | -1.595512               | -1.263496 | -0.081036 |
| 5                | 7                | 0              | -1.140132               | -2.576332 | 0.016327  |
| 6                | 6                | 0              | -2.979672               | -0.990022 | 0.369832  |
| 7                | 6                | 0              | -3.193086               | -0.308434 | 1.576762  |
| 8                | 6                | 0              | -4.094274               | -1.436549 | -0.359751 |
| 9                | 6                | 0              | -4.486839               | -0.053876 | 2.030096  |
| 10               | 6                | 0              | -5.388629               | -1.184018 | 0.094278  |
| 11               | 6                | 0              | -5.587913               | -0.488150 | 1.289553  |
| 12               | 6                | 0              | 2.092524                | -1.027165 | -0.543456 |
| 13               | 8                | 0              | 2.865370                | -1.459291 | -1.394405 |
| 14               | 6                | 0              | 0.979826                | -3.939194 | -0.205458 |
| 15               | 6                | 0              | 2.192443                | -3.909712 | 0.746375  |
| 16               | 6                | 0              | 1.394538                | -4.363034 | -1.630160 |
| 17               | 7                | 0              | 2.502465                | -0.254911 | 0.528616  |
| 18               | 6                | 0              | 3.710826                | 0.458498  | 0.665383  |
| 19               | 1                | 0              | 1.741607                | 0.082213  | 1.104449  |
| 20               | 6                | 0              | -1.931308               | -3.722289 | 0.452017  |
| 21               | 6                | 0              | 3.709807                | 1.578660  | 1.512521  |
| 22               | 6                | 0              | 4.872526                | 2.320297  | 1.701461  |
| 23               | 6                | 0              | 6.051212                | 1.961993  | 1.043397  |
| 24               | 6                | 0              | 6.048238                | 0.851437  | 0.198060  |
| 25               | 6                | 0              | 4.893698                | 0.092369  | 0.004602  |
| 26               | 1                | 0              | -2.334290               | 0.040941  | 2.141718  |
| 27               | 1                | 0              | -3.936402               | -1.960961 | -1.298556 |
| 28               | 1                | 0              | -4.635145               | 0.488469  | 2.959812  |
| 29               | 1                | 0              | -6.240942               | -1.525025 | -0.487258 |
| 30               | 1                | 0              | 0.304778                | -4.711347 | 0.179157  |
| 31               | 1                | 0              | 2.978155                | -3.249152 | 0.373616  |
| 32               | 1                | 0              | 2.617620                | -4.916417 | 0.831094  |
| 33               | 1                | 0              | 1.904175                | -3.574199 | 1.748742  |
| 34               | 1                | 0              | 2.066167                | -3.616547 | -2.060817 |
| 35               | 1                | 0              | 0.518228                | -4.455119 | -2.282414 |

|    |   |   |           |           |           |
|----|---|---|-----------|-----------|-----------|
| 36 | 1 | 0 | 1.905864  | -5.333087 | -1.604447 |
| 37 | 1 | 0 | -1.492294 | -4.172983 | 1.347276  |
| 38 | 1 | 0 | -2.941193 | -3.397851 | 0.690656  |
| 39 | 1 | 0 | -1.983239 | -4.478474 | -0.337626 |
| 40 | 1 | 0 | 2.788849  | 1.873688  | 2.010997  |
| 41 | 1 | 0 | 4.852825  | 3.184887  | 2.359644  |
| 42 | 1 | 0 | 6.958513  | 2.541726  | 1.187496  |
| 43 | 1 | 0 | 6.958734  | 0.562296  | -0.320442 |
| 44 | 1 | 0 | 4.891730  | -0.764261 | -0.654055 |
| 45 | 6 | 0 | -0.404037 | 1.012705  | -0.776356 |
| 46 | 6 | 0 | -1.435778 | 2.030484  | -0.642378 |
| 47 | 6 | 0 | 0.834591  | 1.484909  | -1.215837 |
| 48 | 6 | 0 | -2.828997 | 1.775567  | -0.713711 |
| 49 | 6 | 0 | -1.048339 | 3.416839  | -0.559109 |
| 50 | 6 | 0 | 1.195791  | 2.847647  | -1.210549 |
| 51 | 1 | 0 | 1.584054  | 0.792827  | -1.568794 |
| 52 | 6 | 0 | -3.772567 | 2.767060  | -0.546107 |
| 53 | 1 | 0 | -3.166207 | 0.786415  | -0.967419 |
| 54 | 6 | 0 | -2.037328 | 4.412314  | -0.332415 |
| 55 | 6 | 0 | 0.297318  | 3.797718  | -0.795776 |
| 56 | 1 | 0 | 2.205008  | 3.121493  | -1.504139 |
| 57 | 6 | 0 | -3.376342 | 4.098642  | -0.300628 |
| 58 | 1 | 0 | -4.826759 | 2.514639  | -0.620296 |
| 59 | 1 | 0 | -1.710595 | 5.444752  | -0.230039 |
| 60 | 1 | 0 | 0.575012  | 4.846213  | -0.722377 |
| 61 | 1 | 0 | -4.121616 | 4.873719  | -0.142936 |
| 62 | 1 | 0 | -6.596101 | -0.286470 | 1.640982  |

Compound 1b TS180

Method: b3lyp/6-31g(d) EmpiricalDispersion=GD3 opt(ts,noeigentest,addredun)

SCF Done: E(RB3LYP) = -1382.97069885 A.U. after 1 cycles

Lowest frequency = -29.0685

Zero-point correction= 0.514838  
(Hartree/Particle)  
Thermal correction to Energy= 0.542979  
Thermal correction to Enthalpy= 0.543923  
Thermal correction to Gibbs Free Energy= 0.455785  
Sum of electronic and zero-point Energies= -1382.455861  
Sum of electronic and thermal Energies= -1382.427720  
Sum of electronic and thermal Enthalpies= -1382.426775  
Sum of electronic and thermal Free Energies= -1382.514914

Standard orientation:

| Center<br>Number | Atomic<br>Number | Atomic<br>Type | Coordinates (Angstroms) |           |           |
|------------------|------------------|----------------|-------------------------|-----------|-----------|
|                  |                  |                | X                       | Y         | Z         |
| 1                | 6                | 0              | -0.657137               | -2.437983 | -0.231298 |
| 2                | 6                | 0              | -0.027640               | -1.232031 | -0.498505 |
| 3                | 6                | 0              | -1.006052               | -0.161927 | -0.432801 |
| 4                | 6                | 0              | -2.204040               | -0.799645 | -0.048302 |
| 5                | 7                | 0              | -1.977712               | -2.163117 | 0.041438  |
| 6                | 6                | 0              | -3.512060               | -0.253469 | 0.384271  |
| 7                | 6                | 0              | -3.585926               | 0.555357  | 1.529837  |
| 8                | 6                | 0              | -4.697309               | -0.542090 | -0.312145 |
| 9                | 6                | 0              | -4.807176               | 1.070587  | 1.958936  |
| 10               | 6                | 0              | -5.922120               | -0.033319 | 0.122769  |



|    |   |   |           |           |           |
|----|---|---|-----------|-----------|-----------|
| 11 | 6 | 0 | -5.980099 | 0.777185  | 1.257822  |
| 12 | 6 | 0 | 1.459972  | -1.234937 | -0.651415 |
| 13 | 8 | 0 | 2.047954  | -1.627974 | -1.655120 |
| 14 | 6 | 0 | -0.132803 | -3.857619 | -0.287870 |
| 15 | 6 | 0 | 1.159448  | -4.088142 | 0.520202  |
| 16 | 6 | 0 | 0.046390  | -4.304341 | -1.755043 |
| 17 | 7 | 0 | 2.103495  | -0.839212 | 0.503603  |
| 18 | 6 | 0 | 3.467576  | -0.542131 | 0.691771  |
| 19 | 1 | 0 | 1.482340  | -0.493720 | 1.223294  |
| 20 | 6 | 0 | -2.941337 | -3.160417 | 0.493175  |
| 21 | 6 | 0 | 3.818809  | 0.163181  | 1.854291  |
| 22 | 6 | 0 | 5.145260  | 0.503403  | 2.099352  |
| 23 | 6 | 0 | 6.143204  | 0.150451  | 1.187698  |
| 24 | 6 | 0 | 5.792188  | -0.550162 | 0.033254  |
| 25 | 6 | 0 | 4.467093  | -0.905052 | -0.224660 |
| 26 | 1 | 0 | -2.671283 | 0.788658  | 2.066346  |
| 27 | 1 | 0 | -4.648816 | -1.155204 | -1.208424 |
| 28 | 1 | 0 | -4.844999 | 1.699803  | 2.844152  |
| 29 | 1 | 0 | -6.828667 | -0.263807 | -0.430505 |
| 30 | 1 | 0 | -0.893634 | -4.505842 | 0.161002  |
| 31 | 1 | 0 | 2.019790  | -3.601267 | 0.055771  |
| 32 | 1 | 0 | 1.373409  | -5.162124 | 0.565061  |
| 33 | 1 | 0 | 1.064280  | -3.714561 | 1.545389  |
| 34 | 1 | 0 | 0.791367  | -3.673736 | -2.247909 |
| 35 | 1 | 0 | -0.894998 | -4.218470 | -2.310055 |
| 36 | 1 | 0 | 0.377295  | -5.349174 | -1.799888 |
| 37 | 1 | 0 | -2.560301 | -3.690764 | 1.371022  |
| 38 | 1 | 0 | -3.871811 | -2.667088 | 0.765289  |
| 39 | 1 | 0 | -3.147374 | -3.887263 | -0.299086 |
| 40 | 1 | 0 | 3.043599  | 0.457271  | 2.558779  |
| 41 | 1 | 0 | 5.396858  | 1.052895  | 3.002486  |
| 42 | 1 | 0 | 7.178836  | 0.418729  | 1.375844  |
| 43 | 1 | 0 | 6.558370  | -0.831795 | -0.684387 |
| 44 | 1 | 0 | 4.196746  | -1.443141 | -1.121580 |
| 45 | 6 | 0 | -0.950560 | 1.307797  | -0.719944 |
| 46 | 6 | 0 | 0.221111  | 2.166664  | -0.681572 |
| 47 | 6 | 0 | -2.160950 | 1.957291  | -0.963379 |
| 48 | 6 | 0 | 1.551741  | 1.733001  | -0.917091 |
| 49 | 6 | 0 | 0.042337  | 3.584949  | -0.492250 |
| 50 | 6 | 0 | -2.321574 | 3.355103  | -0.883895 |
| 51 | 1 | 0 | -3.043424 | 1.373962  | -1.177689 |
| 52 | 6 | 0 | 2.639114  | 2.570003  | -0.779030 |
| 53 | 1 | 0 | 1.722352  | 0.749308  | -1.316738 |
| 54 | 6 | 0 | 1.179534  | 4.419768  | -0.315155 |
| 55 | 6 | 0 | -1.254230 | 4.155005  | -0.561504 |
| 56 | 1 | 0 | -3.309541 | 3.780099  | -1.039247 |
| 57 | 6 | 0 | 2.457832  | 3.922845  | -0.419773 |
| 58 | 1 | 0 | 3.635059  | 2.182170  | -0.972222 |
| 59 | 1 | 0 | 1.013102  | 5.478766  | -0.130209 |
| 60 | 1 | 0 | -1.371044 | 5.227153  | -0.423587 |
| 61 | 1 | 0 | 3.317072  | 4.574830  | -0.287695 |
| 62 | 1 | 0 | -6.932260 | 1.178448  | 1.593980  |

-----

Compound 1c GS1

Method: b3lyp/6-31g(d) EmpiricalDispersion=GD3 opt freq

SCF Done: E(RB3LYP) = -1422.33189056 A.U. after 1 cycles

Lowest frequency = 15.5000

Zero-point correction= 0.542894  
 (Hartree/Particle)  
 Thermal correction to Energy= 0.573653  
 Thermal correction to Enthalpy= 0.574597  
 Thermal correction to Gibbs Free Energy= 0.479662  
 Sum of electronic and zero-point Energies= -1421.788996  
 Sum of electronic and thermal Energies= -1421.758238  
 Sum of electronic and thermal Enthalpies= -1421.757294  
 Sum of electronic and thermal Free Energies= -1421.852228

Standard orientation:

| Center<br>Number | Atomic<br>Number | Atomic<br>Type | Coordinates (Angstroms) |           |           |
|------------------|------------------|----------------|-------------------------|-----------|-----------|
|                  |                  |                | X                       | Y         | Z         |
| 1                | 6                | 0              | 3.216871                | 0.191662  | 0.338009  |
| 2                | 6                | 0              | 5.528191                | -1.389851 | 0.633749  |
| 3                | 6                | 0              | 1.977492                | 0.964023  | 0.164603  |
| 4                | 6                | 0              | -3.541391               | -0.041397 | -0.288976 |
| 5                | 7                | 0              | 1.936459                | 2.319665  | -0.153925 |
| 6                | 6                | 0              | 0.670968                | 0.507688  | 0.221751  |
| 7                | 6                | 0              | -0.184937               | 1.625621  | -0.073544 |
| 8                | 6                | 0              | -1.668463               | 1.618008  | -0.064053 |
| 9                | 8                | 0              | -2.347343               | 2.582068  | 0.296167  |
| 10               | 6                | 0              | 0.629551                | 2.735290  | -0.299392 |
| 11               | 6                | 0              | 3.091115                | 3.211706  | -0.156335 |
| 12               | 6                | 0              | 0.302036                | 4.170572  | -0.642367 |
| 13               | 6                | 0              | -0.169000               | 4.945426  | 0.605606  |
| 14               | 6                | 0              | -0.707570               | 4.294897  | -1.798964 |
| 15               | 6                | 0              | 4.260936                | 0.257972  | -0.602317 |
| 16               | 6                | 0              | 5.408532                | -0.518943 | -0.451016 |
| 17               | 6                | 0              | 4.492598                | -1.474871 | 1.567199  |
| 18               | 6                | 0              | 3.351366                | -0.688256 | 1.425653  |
| 19               | 6                | 0              | -4.632934               | 0.803420  | -0.035307 |
| 20               | 6                | 0              | -5.901296               | 0.247545  | 0.135943  |
| 21               | 6                | 0              | -6.105648               | -1.130445 | 0.050366  |
| 22               | 6                | 0              | -5.015796               | -1.966051 | -0.206040 |
| 23               | 6                | 0              | -3.742151               | -1.430176 | -0.370816 |
| 24               | 6                | 0              | 0.249954                | -0.881727 | 0.540301  |
| 25               | 6                | 0              | 0.471912                | -1.931590 | -0.414636 |
| 26               | 6                | 0              | -0.407468               | -1.154047 | 1.738446  |
| 27               | 6                | 0              | 1.099307                | -1.701531 | -1.671770 |
| 28               | 6                | 0              | 0.028098                | -3.262391 | -0.115062 |
| 29               | 6                | 0              | -0.841098               | -2.477884 | 2.008439  |
| 30               | 6                | 0              | -0.697916               | -0.066438 | 2.745758  |
| 31               | 6                | 0              | 1.293415                | -2.728242 | -2.568173 |
| 32               | 6                | 0              | 0.248367                | -4.300149 | -1.060389 |
| 33               | 6                | 0              | -0.630057               | -3.502487 | 1.117580  |
| 34               | 6                | 0              | 0.869306                | -4.043525 | -2.260850 |
| 35               | 7                | 0              | -2.225158               | 0.424667  | -0.473866 |
| 36               | 1                | 0              | -1.566799               | -0.290614 | -0.751494 |
| 37               | 1                | 0              | 3.942866                | 2.689224  | 0.277368  |
| 38               | 1                | 0              | 2.883185                | 4.098149  | 0.448059  |
| 39               | 1                | 0              | 3.352655                | 3.526976  | -1.172332 |
| 40               | 1                | 0              | 1.229868                | 4.637962  | -0.994364 |
| 41               | 1                | 0              | -1.092531               | 4.501115  | 0.983304  |
| 42               | 1                | 0              | 0.585279                | 4.912167  | 1.401485  |
| 43               | 1                | 0              | -0.352978               | 5.996967  | 0.354194  |
| 44               | 1                | 0              | -1.689730               | 3.921298  | -1.505134 |

|    |   |   |           |           |           |
|----|---|---|-----------|-----------|-----------|
| 45 | 1 | 0 | -0.813910 | 5.348805  | -2.081583 |
| 46 | 1 | 0 | -0.367619 | 3.737943  | -2.679380 |
| 47 | 1 | 0 | 4.158137  | 0.905511  | -1.469061 |
| 48 | 1 | 0 | 6.203015  | -0.454947 | -1.189868 |
| 49 | 1 | 0 | 4.576059  | -2.151816 | 2.413192  |
| 50 | 1 | 0 | 2.549592  | -0.753533 | 2.153860  |
| 51 | 1 | 0 | -4.473992 | 1.870276  | 0.030426  |
| 52 | 1 | 0 | -6.741072 | 0.908803  | 0.334057  |
| 53 | 1 | 0 | -7.099678 | -1.548692 | 0.181820  |
| 54 | 1 | 0 | -5.153531 | -3.042224 | -0.271610 |
| 55 | 1 | 0 | -2.892410 | -2.086208 | -0.547976 |
| 56 | 1 | 0 | 1.427506  | -0.697364 | -1.915150 |
| 57 | 1 | 0 | -1.353661 | -2.675716 | 2.946503  |
| 58 | 1 | 0 | -0.868130 | -0.488763 | 3.741347  |
| 59 | 1 | 0 | 0.121776  | 0.655930  | 2.807131  |
| 60 | 1 | 0 | -1.597621 | 0.497952  | 2.469344  |
| 61 | 1 | 0 | 1.775645  | -2.527981 | -3.521200 |
| 62 | 1 | 0 | -0.088496 | -5.305078 | -0.816164 |
| 63 | 1 | 0 | -0.969619 | -4.509959 | 1.346348  |
| 64 | 1 | 0 | 1.030812  | -4.845090 | -2.976441 |
| 65 | 1 | 0 | 6.419299  | -2.000944 | 0.748126  |

Compound 1c GS2

Method: b3lyp/6-31g(d) EmpiricalDispersion=GD3 opt freq

SCF Done: E(RB3LYP) = -1422.33295008 A.U. after 1 cycles

Lowest frequency = 17.0566

Zero-point correction= 0.543164  
(Hartree/Particle)  
Thermal correction to Energy= 0.573792  
Thermal correction to Enthalpy= 0.574737  
Thermal correction to Gibbs Free Energy= 0.480626  
Sum of electronic and zero-point Energies= -1421.789786  
Sum of electronic and thermal Energies= -1421.759158  
Sum of electronic and thermal Enthalpies= -1421.758214  
Sum of electronic and thermal Free Energies= -1421.852324

Standard orientation:

| Center<br>Number | Atomic<br>Number | Atomic<br>Type | Coordinates (Angstroms) |           |           |
|------------------|------------------|----------------|-------------------------|-----------|-----------|
|                  |                  |                | X                       | Y         | Z         |
| 1                | 6                | 0              | -3.370195               | -0.422182 | -0.000995 |
| 2                | 6                | 0              | -5.424878               | -2.345743 | -0.105073 |
| 3                | 6                | 0              | -2.258979               | 0.539994  | 0.022169  |
| 4                | 6                | 0              | 3.334020                | 0.524295  | -0.728588 |
| 5                | 7                | 0              | -2.414670               | 1.917426  | 0.155025  |
| 6                | 6                | 0              | -0.906250               | 0.281334  | -0.110040 |
| 7                | 6                | 0              | -0.219355               | 1.546304  | -0.049342 |
| 8                | 6                | 0              | 1.250657                | 1.759158  | -0.065278 |
| 9                | 8                | 0              | 1.798546                | 2.702509  | 0.508650  |
| 10               | 6                | 0              | -1.185710               | 2.541780  | 0.112519  |
| 11               | 6                | 0              | -3.670879               | 2.586745  | 0.476310  |
| 12               | 6                | 0              | -1.079588               | 4.045969  | 0.227142  |
| 13               | 6                | 0              | -0.201950               | 4.671406  | -0.873432 |
| 14               | 6                | 0              | -0.614709               | 4.469248  | 1.635590  |
| 15               | 6                | 0              | -4.497121               | -0.229778 | -0.821616 |
| 16               | 6                | 0              | -5.518003               | -1.178776 | -0.866282 |

|    |   |   |           |           |           |
|----|---|---|-----------|-----------|-----------|
| 17 | 6 | 0 | -4.305159 | -2.554307 | 0.703913  |
| 18 | 6 | 0 | -3.290650 | -1.600900 | 0.761614  |
| 19 | 6 | 0 | 3.735443  | -0.752099 | -1.158955 |
| 20 | 6 | 0 | 5.082145  | -1.102227 | -1.158597 |
| 21 | 6 | 0 | 6.048389  | -0.190976 | -0.725714 |
| 22 | 6 | 0 | 5.645669  | 1.074558  | -0.296523 |
| 23 | 6 | 0 | 4.300586  | 1.445425  | -0.296875 |
| 24 | 6 | 0 | -0.306038 | -1.063906 | -0.306716 |
| 25 | 6 | 0 | 0.477365  | -1.649636 | 0.746212  |
| 26 | 6 | 0 | -0.467005 | -1.736484 | -1.516715 |
| 27 | 6 | 0 | 0.671629  | -1.001778 | 1.996889  |
| 28 | 6 | 0 | 1.101297  | -2.921450 | 0.537127  |
| 29 | 6 | 0 | 0.149888  | -3.005498 | -1.693263 |
| 30 | 6 | 0 | -1.280216 | -1.152006 | -2.648271 |
| 31 | 6 | 0 | 1.450317  | -1.574515 | 2.978276  |
| 32 | 6 | 0 | 1.897112  | -3.485299 | 1.568971  |
| 33 | 6 | 0 | 0.911723  | -3.580222 | -0.705725 |
| 34 | 6 | 0 | 2.072714  | -2.827061 | 2.764599  |
| 35 | 7 | 0 | 1.954379  | 0.804215  | -0.767086 |
| 36 | 1 | 0 | 1.395971  | 0.069113  | -1.180900 |
| 37 | 1 | 0 | -4.410202 | 1.836665  | 0.754551  |
| 38 | 1 | 0 | -4.052602 | 3.156351  | -0.378032 |
| 39 | 1 | 0 | -3.531019 | 3.264966  | 1.321581  |
| 40 | 1 | 0 | -2.088245 | 4.449681  | 0.076756  |
| 41 | 1 | 0 | 0.842272  | 4.378515  | -0.756643 |
| 42 | 1 | 0 | -0.544915 | 4.366998  | -1.868829 |
| 43 | 1 | 0 | -0.260712 | 5.764496  | -0.811893 |
| 44 | 1 | 0 | 0.389334  | 4.082128  | 1.820772  |
| 45 | 1 | 0 | -0.598459 | 5.562774  | 1.717630  |
| 46 | 1 | 0 | -1.288443 | 4.079807  | 2.408948  |
| 47 | 1 | 0 | -4.557669 | 0.658432  | -1.444809 |
| 48 | 1 | 0 | -6.379800 | -1.012260 | -1.507195 |
| 49 | 1 | 0 | -4.224352 | -3.459625 | 1.299524  |
| 50 | 1 | 0 | -2.426431 | -1.759887 | 1.398600  |
| 51 | 1 | 0 | 2.984469  | -1.472747 | -1.476497 |
| 52 | 1 | 0 | 5.374724  | -2.094792 | -1.491387 |
| 53 | 1 | 0 | 7.099788  | -0.464709 | -0.722595 |
| 54 | 1 | 0 | 6.387504  | 1.793381  | 0.042316  |
| 55 | 1 | 0 | 3.988321  | 2.424299  | 0.037639  |
| 56 | 1 | 0 | 0.204336  | -0.037870 | 2.166981  |
| 57 | 1 | 0 | 0.017627  | -3.520104 | -2.641850 |
| 58 | 1 | 0 | -1.021160 | -1.622597 | -3.602168 |
| 59 | 1 | 0 | -2.353266 | -1.304656 | -2.478734 |
| 60 | 1 | 0 | -1.124940 | -0.072273 | -2.739714 |
| 61 | 1 | 0 | 1.591191  | -1.058271 | 3.923870  |
| 62 | 1 | 0 | 2.370111  | -4.448835 | 1.393713  |
| 63 | 1 | 0 | 1.385575  | -4.545663 | -0.867466 |
| 64 | 1 | 0 | 2.688380  | -3.265016 | 3.545380  |
| 65 | 1 | 0 | -6.217335 | -3.088096 | -0.144279 |

-----

Compound 1c GS3

Method: b3lyp/6-31g(d) EmpiricalDispersion=GD3 opt freq

SCF Done: E(RB3LYP) = -1422.33163965 A.U. after 1 cycles

Lowest frequency = 16.4477

Zero-point correction= 0.543010  
(Hartree/Particle)  
Thermal correction to Energy= 0.573758

|                                              |              |
|----------------------------------------------|--------------|
| Thermal correction to Enthalpy=              | 0.574703     |
| Thermal correction to Gibbs Free Energy=     | 0.480007     |
| Sum of electronic and zero-point Energies=   | -1421.788630 |
| Sum of electronic and thermal Energies=      | -1421.757881 |
| Sum of electronic and thermal Enthalpies=    | -1421.756937 |
| Sum of electronic and thermal Free Energies= | -1421.851633 |

Standard orientation:

| Center<br>Number | Atomic<br>Number | Atomic<br>Type | Coordinates (Angstroms) |           |           |
|------------------|------------------|----------------|-------------------------|-----------|-----------|
|                  |                  |                | X                       | Y         | Z         |
| 1                | 6                | 0              | 3.273007                | -0.653079 | -0.007493 |
| 2                | 6                | 0              | 5.212299                | -2.693716 | -0.102455 |
| 3                | 6                | 0              | 2.219987                | 0.372400  | 0.010464  |
| 4                | 6                | 0              | -3.386317               | 0.772366  | -0.718103 |
| 5                | 7                | 0              | 2.461247                | 1.739337  | 0.147519  |
| 6                | 6                | 0              | 0.854920                | 0.192309  | -0.123750 |
| 7                | 6                | 0              | 0.249095                | 1.495790  | -0.065268 |
| 8                | 6                | 0              | -1.195059               | 1.837564  | -0.102711 |
| 9                | 8                | 0              | -1.645793               | 2.868269  | 0.402961  |
| 10               | 6                | 0              | 1.270668                | 2.432610  | 0.098816  |
| 11               | 6                | 0              | 3.766662                | 2.307079  | 0.467152  |
| 12               | 6                | 0              | 1.130758                | 3.933567  | 0.206243  |
| 13               | 6                | 0              | 2.109583                | 4.743702  | -0.665900 |
| 14               | 6                | 0              | 1.122359                | 4.404254  | 1.674525  |
| 15               | 6                | 0              | 3.117163                | -1.829039 | 0.747966  |
| 16               | 6                | 0              | 4.074403                | -2.840136 | 0.694633  |
| 17               | 6                | 0              | 5.381514                | -1.529939 | -0.855456 |
| 18               | 6                | 0              | 4.418113                | -0.522684 | -0.814867 |
| 19               | 6                | 0              | -4.259773               | 1.804539  | -0.342047 |
| 20               | 6                | 0              | -5.635530               | 1.572059  | -0.349650 |
| 21               | 6                | 0              | -6.159851               | 0.336385  | -0.732022 |
| 22               | 6                | 0              | -5.285884               | -0.686122 | -1.109115 |
| 23               | 6                | 0              | -3.910652               | -0.474560 | -1.100857 |
| 24               | 6                | 0              | 0.172995                | -1.113071 | -0.320619 |
| 25               | 6                | 0              | -0.634028               | -1.656119 | 0.737248  |
| 26               | 6                | 0              | 0.281148                | -1.787017 | -1.535623 |
| 27               | 6                | 0              | -0.773931               | -1.005930 | 1.994009  |
| 28               | 6                | 0              | -1.338311               | -2.885153 | 0.526972  |
| 29               | 6                | 0              | -0.416179               | -3.013100 | -1.713903 |
| 30               | 6                | 0              | 1.121474                | -1.245859 | -2.668710 |
| 31               | 6                | 0              | -1.574908               | -1.536658 | 2.980986  |
| 32               | 6                | 0              | -2.155973               | -3.405864 | 1.564587  |
| 33               | 6                | 0              | -1.203394               | -3.545356 | -0.722222 |
| 34               | 6                | 0              | -2.276328               | -2.746760 | 2.766521  |
| 35               | 7                | 0              | -1.985736               | 0.907827  | -0.743952 |
| 36               | 1                | 0              | -1.498752               | 0.099906  | -1.109649 |
| 37               | 1                | 0              | 4.395511                | 1.528627  | 0.899846  |
| 38               | 1                | 0              | 3.653471                | 3.108126  | 1.197327  |
| 39               | 1                | 0              | 4.263079                | 2.705306  | -0.423512 |
| 40               | 1                | 0              | 0.126243                | 4.135866  | -0.171405 |
| 41               | 1                | 0              | 3.123758                | 4.780939  | -0.257147 |
| 42               | 1                | 0              | 2.166428                | 4.338422  | -1.682573 |
| 43               | 1                | 0              | 1.756414                | 5.778642  | -0.736352 |
| 44               | 1                | 0              | 2.070284                | 4.197862  | 2.186414  |
| 45               | 1                | 0              | 0.946907                | 5.485531  | 1.723030  |
| 46               | 1                | 0              | 0.316573                | 3.901094  | 2.216140  |
| 47               | 1                | 0              | 2.239669                | -1.940175 | 1.376834  |

|    |   |   |           |           |           |
|----|---|---|-----------|-----------|-----------|
| 48 | 1 | 0 | 3.934722  | -3.741976 | 1.284612  |
| 49 | 1 | 0 | 6.258385  | -1.410587 | -1.486379 |
| 50 | 1 | 0 | 4.538947  | 0.364486  | -1.430321 |
| 51 | 1 | 0 | -3.853389 | 2.760651  | -0.044626 |
| 52 | 1 | 0 | -6.304531 | 2.376517  | -0.054378 |
| 53 | 1 | 0 | -7.233643 | 0.171077  | -0.735904 |
| 54 | 1 | 0 | -5.673815 | -1.657424 | -1.405186 |
| 55 | 1 | 0 | -3.232839 | -1.280341 | -1.376083 |
| 56 | 1 | 0 | -0.244914 | -0.074425 | 2.164218  |
| 57 | 1 | 0 | -0.325871 | -3.528671 | -2.666838 |
| 58 | 1 | 0 | 2.186380  | -1.444466 | -2.495302 |
| 59 | 1 | 0 | 0.843862  | -1.709494 | -3.620705 |
| 60 | 1 | 0 | 1.013667  | -0.160791 | -2.765863 |
| 61 | 1 | 0 | -1.672367 | -1.019994 | 3.931828  |
| 62 | 1 | 0 | -2.689679 | -4.337072 | 1.388898  |
| 63 | 1 | 0 | -1.738430 | -4.478060 | -0.885233 |
| 64 | 1 | 0 | -2.908648 | -3.151515 | 3.551889  |
| 65 | 1 | 0 | 5.960183  | -3.481123 | -0.138360 |

Compound 1c TS0

Method: b3lyp/6-31g(d) EmpiricalDispersion=GD3 opt(ts,noeigentest,addredun)

SCF Done: E(RB3LYP) = -1422.27563083 A.U. after 1 cycles

Lowest frequency = -19.8907

Zero-point correction= 0.542759  
(Hartree/Particle)  
Thermal correction to Energy= 0.572080  
Thermal correction to Enthalpy= 0.573024  
Thermal correction to Gibbs Free Energy= 0.483444  
Sum of electronic and zero-point Energies= -1421.732872  
Sum of electronic and thermal Energies= -1421.703551  
Sum of electronic and thermal Enthalpies= -1421.702607  
Sum of electronic and thermal Free Energies= -1421.792187

Standard orientation:

| Center<br>Number | Atomic<br>Number | Atomic<br>Type | Coordinates (Angstroms) |           |           |
|------------------|------------------|----------------|-------------------------|-----------|-----------|
|                  |                  |                | X                       | Y         | Z         |
| 1                | 6                | 0              | -0.586141               | 2.504914  | -0.394369 |
| 2                | 6                | 0              | -0.836417               | 1.178731  | -0.718853 |
| 3                | 6                | 0              | 0.387421                | 0.411475  | -0.541063 |
| 4                | 6                | 0              | 1.308847                | 1.325949  | 0.020826  |
| 5                | 7                | 0              | 0.709618                | 2.579639  | 0.065454  |
| 6                | 6                | 0              | 2.600235                | 1.118083  | 0.713164  |
| 7                | 6                | 0              | 2.684335                | 0.173299  | 1.748065  |
| 8                | 6                | 0              | 3.751526                | 1.853365  | 0.385428  |
| 9                | 6                | 0              | 3.886791                | -0.049118 | 2.413989  |
| 10               | 6                | 0              | 4.951161                | 1.645384  | 1.064181  |
| 11               | 6                | 0              | 5.024702                | 0.687698  | 2.076806  |
| 12               | 6                | 0              | -2.257870               | 0.720452  | -0.723982 |
| 13               | 8                | 0              | -3.124989               | 1.092215  | -1.509459 |
| 14               | 6                | 0              | -1.481370               | 3.725288  | -0.461387 |
| 15               | 6                | 0              | -2.678290               | 3.651490  | 0.509434  |
| 16               | 6                | 0              | -1.937244               | 4.009160  | -1.907384 |
| 17               | 7                | 0              | -2.521380               | -0.080625 | 0.371310  |
| 18               | 6                | 0              | -3.699513               | -0.778217 | 0.697656  |
| 19               | 1                | 0              | -1.703691               | -0.337713 | 0.908944  |

|    |   |   |           |           |           |
|----|---|---|-----------|-----------|-----------|
| 20 | 6 | 0 | 1.277470  | 3.774478  | 0.683652  |
| 21 | 6 | 0 | -3.605385 | -1.769129 | 1.689610  |
| 22 | 6 | 0 | -4.730806 | -2.492334 | 2.073505  |
| 23 | 6 | 0 | -5.966501 | -2.244567 | 1.471500  |
| 24 | 6 | 0 | -6.056380 | -1.264303 | 0.482163  |
| 25 | 6 | 0 | -4.939683 | -0.526342 | 0.088740  |
| 26 | 1 | 0 | 1.802254  | -0.405932 | 2.002631  |
| 27 | 1 | 0 | 3.709547  | 2.569644  | -0.431204 |
| 28 | 1 | 0 | 3.935549  | -0.798223 | 3.199448  |
| 29 | 1 | 0 | 5.831973  | 2.219996  | 0.790165  |
| 30 | 1 | 0 | -0.879404 | 4.585487  | -0.150058 |
| 31 | 1 | 0 | -3.386016 | 2.875456  | 0.209955  |
| 32 | 1 | 0 | -3.212782 | 4.608496  | 0.510993  |
| 33 | 1 | 0 | -2.348005 | 3.443157  | 1.533645  |
| 34 | 1 | 0 | -2.544076 | 3.183495  | -2.283465 |
| 35 | 1 | 0 | -1.072709 | 4.133650  | -2.569534 |
| 36 | 1 | 0 | -2.528847 | 4.932275  | -1.939490 |
| 37 | 1 | 0 | 0.557178  | 4.218527  | 1.374865  |
| 38 | 1 | 0 | 2.166998  | 3.502290  | 1.246852  |
| 39 | 1 | 0 | 1.551855  | 4.518544  | -0.071765 |
| 40 | 1 | 0 | -2.642467 | -1.974153 | 2.153474  |
| 41 | 1 | 0 | -4.638240 | -3.254524 | 2.842628  |
| 42 | 1 | 0 | -6.845390 | -2.809427 | 1.768775  |
| 43 | 1 | 0 | -7.011437 | -1.063058 | 0.003857  |
| 44 | 1 | 0 | -5.009340 | 0.228387  | -0.681213 |
| 45 | 6 | 0 | 0.657443  | -1.024241 | -0.835091 |
| 46 | 6 | 0 | 2.030736  | -1.520119 | -0.841314 |
| 47 | 6 | 0 | -0.317258 | -2.010370 | -1.096057 |
| 48 | 6 | 0 | 3.121643  | -0.738300 | -1.302726 |
| 49 | 6 | 0 | 2.310030  | -2.885526 | -0.512336 |
| 50 | 6 | 0 | -0.018409 | -3.369036 | -0.789544 |
| 51 | 6 | 0 | 4.416105  | -1.211631 | -1.282990 |
| 52 | 1 | 0 | 2.919209  | 0.243712  | -1.711381 |
| 53 | 6 | 0 | 3.655874  | -3.330195 | -0.432010 |
| 54 | 6 | 0 | 1.222818  | -3.788331 | -0.389264 |
| 55 | 1 | 0 | -0.828771 | -4.089134 | -0.885100 |
| 56 | 6 | 0 | 4.697535  | -2.504360 | -0.789882 |
| 57 | 1 | 0 | 5.222147  | -0.584116 | -1.652544 |
| 58 | 1 | 0 | 3.842706  | -4.359171 | -0.132752 |
| 59 | 1 | 0 | 1.406312  | -4.821677 | -0.105703 |
| 60 | 1 | 0 | 5.723316  | -2.860245 | -0.745017 |
| 61 | 6 | 0 | -1.616475 | -1.816568 | -1.853311 |
| 62 | 1 | 0 | -2.515717 | -2.010063 | -1.261599 |
| 63 | 1 | 0 | -1.705647 | -0.835770 | -2.315792 |
| 64 | 1 | 0 | -1.618049 | -2.547477 | -2.672109 |
| 65 | 1 | 0 | 5.962208  | 0.514263  | 2.597879  |

Compound 1c TS180

Method: b3lyp/6-31g(d) EmpiricalDispersion=GD3 opt(ts,noeigentest,addredun)

SCF Done: E(RB3LYP) = -1422.27704289 A.U. after 1 cycles

Lowest frequency = -13.7957

|                                            |              |
|--------------------------------------------|--------------|
| Zero-point correction=                     | 0.542983     |
| (Hartree/Particle)                         |              |
| Thermal correction to Energy=              | 0.572150     |
| Thermal correction to Enthalpy=            | 0.573094     |
| Thermal correction to Gibbs Free Energy=   | 0.484381     |
| Sum of electronic and zero-point Energies= | -1421.734060 |

Sum of electronic and thermal Energies= -1421.704893  
Sum of electronic and thermal Enthalpies= -1421.703949  
Sum of electronic and thermal Free Energies= -1421.792662

Standard orientation:

| Center<br>Number | Atomic<br>Number | Atomic<br>Type | Coordinates (Angstroms) |           |           |
|------------------|------------------|----------------|-------------------------|-----------|-----------|
|                  |                  |                | X                       | Y         | Z         |
| 1                | 6                | 0              | 1.012484                | 2.435573  | -0.341315 |
| 2                | 6                | 0              | 0.193503                | 1.333770  | -0.543009 |
| 3                | 6                | 0              | 1.015954                | 0.127005  | -0.537490 |
| 4                | 6                | 0              | 2.308865                | 0.576625  | -0.191869 |
| 5                | 7                | 0              | 2.287773                | 1.965839  | -0.122883 |
| 6                | 6                | 0              | 3.470862                | -0.140225 | 0.376827  |
| 7                | 6                | 0              | 3.284673                | -0.910130 | 1.535916  |
| 8                | 6                | 0              | 4.763922                | -0.044189 | -0.162744 |
| 9                | 6                | 0              | 4.355352                | -1.579658 | 2.126559  |
| 10               | 6                | 0              | 5.838404                | -0.702522 | 0.434306  |
| 11               | 6                | 0              | 5.636892                | -1.476178 | 1.579499  |
| 12               | 6                | 0              | -1.283455               | 1.495343  | -0.365918 |
| 13               | 8                | 0              | -1.986108               | 2.252438  | -1.031428 |
| 14               | 6                | 0              | 0.700123                | 3.918273  | -0.322650 |
| 15               | 6                | 0              | -0.285795               | 4.317612  | 0.794445  |
| 16               | 6                | 0              | 0.225861                | 4.409927  | -1.705707 |
| 17               | 7                | 0              | -1.755051               | 0.791751  | 0.724661  |
| 18               | 6                | 0              | -3.092776               | 0.493712  | 1.050818  |
| 19               | 1                | 0              | -1.072767               | 0.172285  | 1.142013  |
| 20               | 6                | 0              | 3.402223                | 2.815981  | 0.284000  |
| 21               | 6                | 0              | -3.319400               | -0.609250 | 1.888770  |
| 22               | 6                | 0              | -4.615231               | -0.971770 | 2.241596  |
| 23               | 6                | 0              | -5.705861               | -0.241125 | 1.764394  |
| 24               | 6                | 0              | -5.477577               | 0.857848  | 0.935148  |
| 25               | 6                | 0              | -4.183880               | 1.237698  | 0.576748  |
| 26               | 1                | 0              | 2.286597                | -0.993673 | 1.954795  |
| 27               | 1                | 0              | 4.917150                | 0.529614  | -1.073076 |
| 28               | 1                | 0              | 4.190257                | -2.177695 | 3.018749  |
| 29               | 1                | 0              | 6.830306                | -0.621351 | -0.002016 |
| 30               | 1                | 0              | 1.636833                | 4.443028  | -0.108092 |
| 31               | 1                | 0              | -1.284452               | 3.919202  | 0.605888  |
| 32               | 1                | 0              | -0.364077               | 5.409962  | 0.842704  |
| 33               | 1                | 0              | 0.054468                | 3.956383  | 1.771732  |
| 34               | 1                | 0              | -0.710056               | 3.919273  | -1.978724 |
| 35               | 1                | 0              | 0.973708                | 4.186469  | -2.475567 |
| 36               | 1                | 0              | 0.069962                | 5.495532  | -1.685476 |
| 37               | 1                | 0              | 3.106718                | 3.456224  | 1.119495  |
| 38               | 1                | 0              | 4.233665                | 2.195318  | 0.608559  |
| 39               | 1                | 0              | 3.736264                | 3.445917  | -0.546916 |
| 40               | 1                | 0              | -2.475448               | -1.200160 | 2.237976  |
| 41               | 1                | 0              | -4.771716               | -1.834160 | 2.884216  |
| 42               | 1                | 0              | -6.718611               | -0.524764 | 2.036711  |
| 43               | 1                | 0              | -6.317207               | 1.436264  | 0.558072  |
| 44               | 1                | 0              | -4.007838               | 2.083340  | -0.072156 |
| 45               | 6                | 0              | 0.585781                | -1.278145 | -0.779935 |
| 46               | 6                | 0              | -0.817187               | -1.613783 | -1.014346 |
| 47               | 6                | 0              | 1.452064                | -2.391505 | -0.781230 |
| 48               | 6                | 0              | -1.693966               | -0.784929 | -1.762063 |
| 49               | 6                | 0              | -1.323613               | -2.897713 | -0.625291 |
| 50               | 6                | 0              | 0.935235                | -3.670523 | -0.433028 |



|    |   |   |           |           |           |
|----|---|---|-----------|-----------|-----------|
| 51 | 6 | 0 | -3.023819 | -1.105549 | -1.939484 |
| 52 | 1 | 0 | -1.304841 | 0.105013  | -2.238351 |
| 53 | 6 | 0 | -2.708506 | -3.179766 | -0.764967 |
| 54 | 6 | 0 | -0.400771 | -3.900618 | -0.230586 |
| 55 | 1 | 0 | 1.648486  | -4.485488 | -0.325465 |
| 56 | 6 | 0 | -3.554825 | -2.291131 | -1.387922 |
| 57 | 1 | 0 | -3.660219 | -0.437626 | -2.511971 |
| 58 | 1 | 0 | -3.076752 | -4.140632 | -0.412360 |
| 59 | 1 | 0 | -0.764442 | -4.871588 | 0.096307  |
| 60 | 1 | 0 | -4.611695 | -2.517552 | -1.494815 |
| 61 | 6 | 0 | 2.876224  | -2.398189 | -1.296586 |
| 62 | 1 | 0 | 3.132238  | -1.468494 | -1.803730 |
| 63 | 1 | 0 | 3.632468  | -2.596907 | -0.531261 |
| 64 | 1 | 0 | 2.948282  | -3.205620 | -2.037015 |
| 65 | 1 | 0 | 6.471982  | -1.995557 | 2.041450  |

Compound 1d GS1

Method: b3lyp/6-31g(d) EmpiricalDispersion=GD3 opt freq

SCF Done: E(RB3LYP) = -1461.65327668 A.U. after 1 cycles

Lowest frequency = 19.7790

Zero-point correction= 0.571283  
(Hartree/Particle)  
Thermal correction to Energy= 0.603384  
Thermal correction to Enthalpy= 0.604328  
Thermal correction to Gibbs Free Energy= 0.507533  
Sum of electronic and zero-point Energies= -1461.081994  
Sum of electronic and thermal Energies= -1461.049893  
Sum of electronic and thermal Enthalpies= -1461.048948  
Sum of electronic and thermal Free Energies= -1461.145744

Standard orientation:

| Center<br>Number | Atomic<br>Number | Atomic<br>Type | Coordinates (Angstroms) |           |           |
|------------------|------------------|----------------|-------------------------|-----------|-----------|
|                  |                  |                | X                       | Y         | Z         |
| 1                | 6                | 0              | 3.228000                | 0.066382  | 0.486047  |
| 2                | 6                | 0              | 5.400650                | -1.674701 | 0.907344  |
| 3                | 6                | 0              | 2.058595                | 0.924121  | 0.241860  |
| 4                | 6                | 0              | -3.452468               | 0.285236  | -0.495437 |
| 5                | 7                | 0              | 2.129502                | 2.296094  | 0.008799  |
| 6                | 6                | 0              | 0.728478                | 0.549651  | 0.146916  |
| 7                | 6                | 0              | -0.027498               | 1.739147  | -0.151364 |
| 8                | 6                | 0              | -1.505549               | 1.838535  | -0.221760 |
| 9                | 8                | 0              | -2.133908               | 2.828333  | 0.157244  |
| 10               | 6                | 0              | 0.870365                | 2.804303  | -0.228505 |
| 11               | 6                | 0              | 3.330595                | 3.108986  | 0.168106  |
| 12               | 6                | 0              | 0.665538                | 4.276505  | -0.503437 |
| 13               | 6                | 0              | 0.162033                | 5.012308  | 0.755669  |
| 14               | 6                | 0              | -0.248874               | 4.539270  | -1.714402 |
| 15               | 6                | 0              | 4.363400                | 0.117090  | -0.342531 |
| 16               | 6                | 0              | 5.442329                | -0.739364 | -0.128427 |
| 17               | 6                | 0              | 4.273142                | -1.744126 | 1.728898  |
| 18               | 6                | 0              | 3.200240                | -0.878914 | 1.525588  |
| 19               | 6                | 0              | -4.498126               | 1.161714  | -0.165908 |
| 20               | 6                | 0              | -5.775520               | 0.647522  | 0.060493  |
| 21               | 6                | 0              | -6.035245               | -0.719791 | -0.044669 |
| 22               | 6                | 0              | -4.992838               | -1.586703 | -0.381820 |

|    |   |   |           |           |           |
|----|---|---|-----------|-----------|-----------|
| 23 | 6 | 0 | -3.710647 | -1.092596 | -0.604408 |
| 24 | 6 | 0 | 0.206544  | -0.835504 | 0.303950  |
| 25 | 6 | 0 | 0.524321  | -1.815565 | -0.699520 |
| 26 | 6 | 0 | -0.628730 | -1.164524 | 1.370646  |
| 27 | 6 | 0 | 1.321851  | -1.523466 | -1.841410 |
| 28 | 6 | 0 | 0.000532  | -3.140860 | -0.564997 |
| 29 | 6 | 0 | -1.179892 | -2.482616 | 1.470481  |
| 30 | 6 | 0 | -1.016330 | -0.140744 | 2.411744  |
| 31 | 6 | 0 | 1.608475  | -2.493127 | -2.776227 |
| 32 | 6 | 0 | 0.319437  | -4.121006 | -1.542859 |
| 33 | 6 | 0 | -0.848338 | -3.433137 | 0.530456  |
| 34 | 6 | 0 | 1.110084  | -3.808969 | -2.624698 |
| 35 | 7 | 0 | -2.126574 | 0.707639  | -0.715450 |
| 36 | 1 | 0 | -1.502582 | -0.032260 | -1.008439 |
| 37 | 1 | 0 | 4.101380  | 2.510083  | 0.651605  |
| 38 | 1 | 0 | 3.117751  | 3.975539  | 0.798872  |
| 39 | 1 | 0 | 3.710908  | 3.457093  | -0.798499 |
| 40 | 1 | 0 | 1.645908  | 4.694311  | -0.764039 |
| 41 | 1 | 0 | -0.814609 | 4.616518  | 1.042710  |
| 42 | 1 | 0 | 0.853262  | 4.879280  | 1.597111  |
| 43 | 1 | 0 | 0.069894  | 6.087000  | 0.557399  |
| 44 | 1 | 0 | -1.272928 | 4.223198  | -1.509773 |
| 45 | 1 | 0 | -0.261174 | 5.612313  | -1.938684 |
| 46 | 1 | 0 | 0.112656  | 4.008856  | -2.602532 |
| 47 | 1 | 0 | 4.386458  | 0.816325  | -1.174198 |
| 48 | 1 | 0 | 6.309495  | -0.686284 | -0.781419 |
| 49 | 1 | 0 | 4.231006  | -2.471042 | 2.535594  |
| 50 | 1 | 0 | 2.325890  | -0.932142 | 2.165981  |
| 51 | 1 | 0 | -4.296371 | 2.220148  | -0.083664 |
| 52 | 1 | 0 | -6.578446 | 1.333458  | 0.318343  |
| 53 | 1 | 0 | -7.035527 | -1.105342 | 0.131511  |
| 54 | 1 | 0 | -5.173374 | -2.655136 | -0.467138 |
| 55 | 1 | 0 | -2.898162 | -1.774510 | -0.843792 |
| 56 | 1 | 0 | 1.706839  | -0.518480 | -1.968242 |
| 57 | 1 | 0 | -0.938853 | -0.550576 | 3.424857  |
| 58 | 1 | 0 | -0.392068 | 0.752039  | 2.357075  |
| 59 | 1 | 0 | -2.058851 | 0.176835  | 2.274027  |
| 60 | 1 | 0 | 2.221486  | -2.245889 | -3.638787 |
| 61 | 1 | 0 | -0.080395 | -5.125244 | -1.421555 |
| 62 | 1 | 0 | -1.262887 | -4.436220 | 0.610723  |
| 63 | 1 | 0 | 1.346587  | -4.566445 | -3.367087 |
| 64 | 1 | 0 | 6.238186  | -2.347544 | 1.069897  |
| 65 | 6 | 0 | -2.149875 | -2.818139 | 2.577257  |
| 66 | 1 | 0 | -2.494720 | -3.853375 | 2.495970  |
| 67 | 1 | 0 | -1.703144 | -2.691145 | 3.571279  |
| 68 | 1 | 0 | -3.030923 | -2.165659 | 2.535052  |

-----

Compound 1d GS2

Method: b3lyp/6-31g(d) EmpiricalDispersion=GD3 opt freq

SCF Done: E(RB3LYP) = -1461.65183406 A.U. after 1 cycles

Lowest frequency = 20.1057

|                                            |              |
|--------------------------------------------|--------------|
| Zero-point correction=                     | 0.571121     |
| (Hartree/Particle)                         |              |
| Thermal correction to Energy=              | 0.603342     |
| Thermal correction to Enthalpy=            | 0.604286     |
| Thermal correction to Gibbs Free Energy=   | 0.506988     |
| Sum of electronic and zero-point Energies= | -1461.080713 |

Sum of electronic and thermal Energies= -1461.048492  
Sum of electronic and thermal Enthalpies= -1461.047548  
Sum of electronic and thermal Free Energies= -1461.144846

Standard orientation:

| Center<br>Number | Atomic<br>Number | Atomic<br>Type | Coordinates (Angstroms) |           |           |
|------------------|------------------|----------------|-------------------------|-----------|-----------|
|                  |                  |                | X                       | Y         | Z         |
| 1                | 6                | 0              | 3.160695                | -0.206151 | 0.521325  |
| 2                | 6                | 0              | 5.199367                | -2.094289 | 0.978910  |
| 3                | 6                | 0              | 2.057856                | 0.730518  | 0.257927  |
| 4                | 6                | 0              | -3.516617               | 0.593890  | -0.508548 |
| 5                | 7                | 0              | 2.232817                | 2.097189  | 0.035666  |
| 6                | 6                | 0              | 0.706539                | 0.449004  | 0.144603  |
| 7                | 6                | 0              | 0.045240                | 1.690274  | -0.158623 |
| 8                | 6                | 0              | -1.411773               | 1.936777  | -0.273422 |
| 9                | 8                | 0              | -1.928155               | 3.019108  | 0.012241  |
| 10               | 6                | 0              | 1.015333                | 2.690294  | -0.218880 |
| 11               | 6                | 0              | 3.501020                | 2.795443  | 0.216279  |
| 12               | 6                | 0              | 0.798697                | 4.158742  | -0.501813 |
| 13               | 6                | 0              | 1.756898                | 4.768410  | -1.543507 |
| 14               | 6                | 0              | 0.733066                | 4.988904  | 0.795898  |
| 15               | 6                | 0              | 4.316163                | -0.227841 | -0.280145 |
| 16               | 6                | 0              | 5.328538                | -1.157603 | -0.048456 |
| 17               | 6                | 0              | 4.051474                | -2.090881 | 1.774668  |
| 18               | 6                | 0              | 3.045158                | -1.153119 | 1.553504  |
| 19               | 6                | 0              | -4.462088               | 1.601767  | -0.261808 |
| 20               | 6                | 0              | -5.797306               | 1.251598  | -0.057528 |
| 21               | 6                | 0              | -6.212936               | -0.080075 | -0.103767 |
| 22               | 6                | 0              | -5.269541               | -1.078641 | -0.357828 |
| 23               | 6                | 0              | -3.931819               | -0.748994 | -0.557136 |
| 24               | 6                | 0              | 0.084467                | -0.895452 | 0.288598  |
| 25               | 6                | 0              | 0.343179                | -1.893075 | -0.714719 |
| 26               | 6                | 0              | -0.785144               | -1.166786 | 1.344571  |
| 27               | 6                | 0              | 1.179597                | -1.658263 | -1.841624 |
| 28               | 6                | 0              | -0.281224               | -3.175257 | -0.594640 |
| 29               | 6                | 0              | -1.435527               | -2.439974 | 1.429884  |
| 30               | 6                | 0              | -1.105929               | -0.123270 | 2.388775  |
| 31               | 6                | 0              | 1.407825                | -2.643894 | -2.775755 |
| 32               | 6                | 0              | -0.021954               | -4.173344 | -1.571885 |
| 33               | 6                | 0              | -1.165940               | -3.407224 | 0.487001  |
| 34               | 6                | 0              | 0.808202                | -3.918475 | -2.638970 |
| 35               | 7                | 0              | -2.145133               | 0.846802  | -0.702011 |
| 36               | 1                | 0              | -1.601861               | 0.023127  | -0.923609 |
| 37               | 1                | 0              | 4.151504                | 2.190624  | 0.848374  |
| 38               | 1                | 0              | 3.330156                | 3.752953  | 0.707860  |
| 39               | 1                | 0              | 4.004861                | 2.971383  | -0.739519 |
| 40               | 1                | 0              | -0.205436               | 4.204407  | -0.929576 |
| 41               | 1                | 0              | 2.760546                | 4.954002  | -1.149543 |
| 42               | 1                | 0              | 1.850400                | 4.122871  | -2.424179 |
| 43               | 1                | 0              | 1.360931                | 5.734706  | -1.875626 |
| 44               | 1                | 0              | 1.678475                | 4.973320  | 1.351665  |
| 45               | 1                | 0              | 0.501828                | 6.035120  | 0.562905  |
| 46               | 1                | 0              | -0.058008               | 4.597301  | 1.441221  |
| 47               | 1                | 0              | 4.407666                | 0.474103  | -1.104477 |
| 48               | 1                | 0              | 6.212340                | -1.159680 | -0.680988 |
| 49               | 1                | 0              | 3.941455                | -2.817486 | 2.575220  |
| 50               | 1                | 0              | 2.155364                | -1.149716 | 2.174487  |

|    |   |   |           |           |           |
|----|---|---|-----------|-----------|-----------|
| 51 | 1 | 0 | -4.139818 | 2.632669  | -0.225954 |
| 52 | 1 | 0 | -6.521672 | 2.038811  | 0.135718  |
| 53 | 1 | 0 | -7.256666 | -0.337056 | 0.053800  |
| 54 | 1 | 0 | -5.571881 | -2.121982 | -0.397100 |
| 55 | 1 | 0 | -3.198394 | -1.532301 | -0.734517 |
| 56 | 1 | 0 | 1.641621  | -0.684936 | -1.957321 |
| 57 | 1 | 0 | -1.056508 | -0.541689 | 3.400288  |
| 58 | 1 | 0 | -0.423645 | 0.726172  | 2.338183  |
| 59 | 1 | 0 | -2.125338 | 0.262060  | 2.251707  |
| 60 | 1 | 0 | 2.052623  | -2.441189 | -3.626674 |
| 61 | 1 | 0 | -0.498820 | -5.144704 | -1.461862 |
| 62 | 1 | 0 | -1.656005 | -4.376541 | 0.555905  |
| 63 | 1 | 0 | 0.999007  | -4.689097 | -3.380980 |
| 64 | 1 | 0 | 5.985104  | -2.823787 | 1.155164  |
| 65 | 6 | 0 | -2.439230 | -2.707870 | 2.525149  |
| 66 | 1 | 0 | -2.859516 | -3.714046 | 2.434401  |
| 67 | 1 | 0 | -1.993922 | -2.620026 | 3.524022  |
| 68 | 1 | 0 | -3.268652 | -1.991039 | 2.479286  |

Compound 1d GS3

Method: b3lyp/6-31g(d) EmpiricalDispersion=GD3 opt freq

SCF Done: E(RB3LYP) = -1461.65004969 A.U. after 1 cycles

Lowest frequency = 16.1293

Zero-point correction= 0.570726  
(Hartree/Particle)  
Thermal correction to Energy= 0.603309  
Thermal correction to Enthalpy= 0.604253  
Thermal correction to Gibbs Free Energy= 0.505124  
Sum of electronic and zero-point Energies= -1461.079324  
Sum of electronic and thermal Energies= -1461.046741  
Sum of electronic and thermal Enthalpies= -1461.045796  
Sum of electronic and thermal Free Energies= -1461.144925

Standard orientation:

| Center<br>Number | Atomic<br>Number | Atomic<br>Type | Coordinates (Angstroms) |           |           |
|------------------|------------------|----------------|-------------------------|-----------|-----------|
|                  |                  |                | X                       | Y         | Z         |
| 1                | 6                | 0              | -3.244428               | -0.557418 | 0.097783  |
| 2                | 6                | 0              | -5.119840               | -2.655957 | 0.057443  |
| 3                | 6                | 0              | -2.214841               | 0.494361  | 0.085878  |
| 4                | 6                | 0              | 3.370331                | 0.871201  | -0.681690 |
| 5                | 7                | 0              | -2.481424               | 1.862843  | 0.115135  |
| 6                | 6                | 0              | -0.847569               | 0.325851  | -0.019238 |
| 7                | 6                | 0              | -0.259020               | 1.640215  | -0.044701 |
| 8                | 6                | 0              | 1.185773                | 1.985641  | -0.131879 |
| 9                | 8                | 0              | 1.645213                | 3.057193  | 0.267603  |
| 10               | 6                | 0              | -1.295962               | 2.569474  | 0.049544  |
| 11               | 6                | 0              | -3.773264               | 2.422621  | 0.501644  |
| 12               | 6                | 0              | -1.192167               | 4.076725  | 0.010983  |
| 13               | 6                | 0              | -1.648226               | 4.773373  | 1.308526  |
| 14               | 6                | 0              | -1.853198               | 4.690684  | -1.239613 |
| 15               | 6                | 0              | -3.129648               | -1.639001 | 0.987228  |
| 16               | 6                | 0              | -4.055789               | -2.680341 | 0.962203  |
| 17               | 6                | 0              | -5.244686               | -1.587341 | -0.833132 |
| 18               | 6                | 0              | -4.310414               | -0.552061 | -0.819820 |
| 19               | 6                | 0              | 4.247567                | 1.937698  | -0.431285 |

|    |   |   |           |           |           |
|----|---|---|-----------|-----------|-----------|
| 20 | 6 | 0 | 5.623766  | 1.708015  | -0.444997 |
| 21 | 6 | 0 | 6.144637  | 0.440674  | -0.710682 |
| 22 | 6 | 0 | 5.266868  | -0.616693 | -0.961951 |
| 23 | 6 | 0 | 3.891344  | -0.407695 | -0.945614 |
| 24 | 6 | 0 | -0.158358 | -0.989101 | -0.105353 |
| 25 | 6 | 0 | 0.624539  | -1.431307 | 1.016631  |
| 26 | 6 | 0 | -0.254011 | -1.772279 | -1.254151 |
| 27 | 6 | 0 | 0.751046  | -0.668642 | 2.209172  |
| 28 | 6 | 0 | 1.314597  | -2.679459 | 0.932066  |
| 29 | 6 | 0 | 0.418809  | -3.038361 | -1.314660 |
| 30 | 6 | 0 | -1.064788 | -1.323056 | -2.447952 |
| 31 | 6 | 0 | 1.531329  | -1.113335 | 3.254347  |
| 32 | 6 | 0 | 2.110314  | -3.111499 | 2.025485  |
| 33 | 6 | 0 | 1.180659  | -3.456118 | -0.247031 |
| 34 | 6 | 0 | 2.221285  | -2.344788 | 3.163307  |
| 35 | 7 | 0 | 1.969162  | 1.000099  | -0.693976 |
| 36 | 1 | 0 | 1.480138  | 0.159583  | -0.973141 |
| 37 | 1 | 0 | -4.551184 | 1.677862  | 0.343183  |
| 38 | 1 | 0 | -4.004268 | 3.303512  | -0.097184 |
| 39 | 1 | 0 | -3.770855 | 2.701843  | 1.559970  |
| 40 | 1 | 0 | -0.119914 | 4.263098  | -0.068491 |
| 41 | 1 | 0 | -2.732892 | 4.738240  | 1.453373  |
| 42 | 1 | 0 | -1.168081 | 4.318000  | 2.180937  |
| 43 | 1 | 0 | -1.358697 | 5.830117  | 1.278069  |
| 44 | 1 | 0 | -2.945349 | 4.601516  | -1.234211 |
| 45 | 1 | 0 | -1.615960 | 5.759460  | -1.296851 |
| 46 | 1 | 0 | -1.481797 | 4.211206  | -2.151539 |
| 47 | 1 | 0 | -2.304705 | -1.655888 | 1.692708  |
| 48 | 1 | 0 | -3.949166 | -3.510068 | 1.655818  |
| 49 | 1 | 0 | -6.061410 | -1.566658 | -1.549915 |
| 50 | 1 | 0 | -4.386255 | 0.256098  | -1.542795 |
| 51 | 1 | 0 | 3.843972  | 2.918323  | -0.223395 |
| 52 | 1 | 0 | 6.295810  | 2.539450  | -0.247573 |
| 53 | 1 | 0 | 7.218748  | 0.277680  | -0.720707 |
| 54 | 1 | 0 | 5.652233  | -1.612681 | -1.164673 |
| 55 | 1 | 0 | 3.210853  | -1.239025 | -1.120236 |
| 56 | 1 | 0 | 0.230355  | 0.279683  | 2.284783  |
| 57 | 1 | 0 | -2.021514 | -1.860013 | -2.493953 |
| 58 | 1 | 0 | -1.293037 | -0.257181 | -2.398908 |
| 59 | 1 | 0 | -0.538236 | -1.517806 | -3.388244 |
| 60 | 1 | 0 | 1.620408  | -0.511653 | 4.154661  |
| 61 | 1 | 0 | 2.634204  | -4.061271 | 1.945485  |
| 62 | 1 | 0 | 1.698853  | -4.411840 | -0.297727 |
| 63 | 1 | 0 | 2.837186  | -2.682121 | 3.992457  |
| 64 | 1 | 0 | -5.843928 | -3.466027 | 0.042990  |
| 65 | 6 | 0 | 0.294563  | -3.907586 | -2.543582 |
| 66 | 1 | 0 | 0.798034  | -4.867949 | -2.397500 |
| 67 | 1 | 0 | -0.755277 | -4.110105 | -2.788813 |
| 68 | 1 | 0 | 0.738552  | -3.430508 | -3.426967 |

-----

Compound 1d GS4

Method: b3lyp/6-31g(d) EmpiricalDispersion=GD3 opt freq

SCF Done: E(RB3LYP) = -1461.65317916 A.U. after 1 cycles

Lowest frequency = 16.4513

Zero-point correction= 0.571147  
(Hartree/Particle)  
Thermal correction to Energy= 0.603379

|                                              |              |
|----------------------------------------------|--------------|
| Thermal correction to Enthalpy=              | 0.604324     |
| Thermal correction to Gibbs Free Energy=     | 0.506742     |
| Sum of electronic and zero-point Energies=   | -1461.082032 |
| Sum of electronic and thermal Energies=      | -1461.049800 |
| Sum of electronic and thermal Enthalpies=    | -1461.048856 |
| Sum of electronic and thermal Free Energies= | -1461.146437 |

Standard orientation:

| Center<br>Number | Atomic<br>Number | Atomic<br>Type | Coordinates (Angstroms) |           |           |
|------------------|------------------|----------------|-------------------------|-----------|-----------|
|                  |                  |                | X                       | Y         | Z         |
| 1                | 6                | 0              | -3.358415               | -0.252853 | 0.131277  |
| 2                | 6                | 0              | -5.421114               | -2.169694 | 0.172451  |
| 3                | 6                | 0              | -2.240117               | 0.700059  | 0.075923  |
| 4                | 6                | 0              | 3.333664                | 0.541733  | -0.724629 |
| 5                | 7                | 0              | -2.383713               | 2.085013  | 0.082091  |
| 6                | 6                | 0              | -0.891277               | 0.418077  | -0.047395 |
| 7                | 6                | 0              | -0.193915               | 1.676704  | -0.112222 |
| 8                | 6                | 0              | 1.277440                | 1.870705  | -0.171559 |
| 9                | 8                | 0              | 1.845621                | 2.859912  | 0.295220  |
| 10               | 6                | 0              | -1.150173               | 2.691806  | -0.030470 |
| 11               | 6                | 0              | -3.631760               | 2.791045  | 0.352043  |
| 12               | 6                | 0              | -1.030164               | 4.199038  | -0.050786 |
| 13               | 6                | 0              | -0.169131               | 4.716284  | -1.218596 |
| 14               | 6                | 0              | -0.534008               | 4.739535  | 1.305949  |
| 15               | 6                | 0              | -3.291907               | -1.361555 | 0.993456  |
| 16               | 6                | 0              | -4.310347               | -2.312328 | 1.007892  |
| 17               | 6                | 0              | -5.501304               | -1.071889 | -0.686828 |
| 18               | 6                | 0              | -4.476181               | -0.126836 | -0.713557 |
| 19               | 6                | 0              | 4.320445                | 1.491623  | -0.420313 |
| 20               | 6                | 0              | 5.659104                | 1.099547  | -0.387912 |
| 21               | 6                | 0              | 6.035142                | -0.216487 | -0.661431 |
| 22               | 6                | 0              | 5.048592                | -1.156972 | -0.967461 |
| 23               | 6                | 0              | 3.707955                | -0.785332 | -0.996885 |
| 24               | 6                | 0              | -0.307877               | -0.948386 | -0.110519 |
| 25               | 6                | 0              | 0.477270                | -1.415733 | 0.999746  |
| 26               | 6                | 0              | -0.500704               | -1.755585 | -1.230334 |
| 27               | 6                | 0              | 0.701078                | -0.630820 | 2.163283  |
| 28               | 6                | 0              | 1.069269                | -2.714342 | 0.932757  |
| 29               | 6                | 0              | 0.071669                | -3.070982 | -1.270862 |
| 30               | 6                | 0              | -1.317611               | -1.282513 | -2.410922 |
| 31               | 6                | 0              | 1.484610                | -1.101160 | 3.194663  |
| 32               | 6                | 0              | 1.870328                | -3.172048 | 2.011619  |
| 33               | 6                | 0              | 0.836218                | -3.513630 | -0.215298 |
| 34               | 6                | 0              | 2.079189                | -2.382291 | 3.119464  |
| 35               | 7                | 0              | 1.958805                | 0.840738  | -0.784348 |
| 36               | 1                | 0              | 1.384829                | 0.074347  | -1.111109 |
| 37               | 1                | 0              | -4.378598               | 2.072536  | 0.687647  |
| 38               | 1                | 0              | -4.008582               | 3.296836  | -0.543572 |
| 39               | 1                | 0              | -3.483274               | 3.531340  | 1.142163  |
| 40               | 1                | 0              | -2.038234               | 4.598066  | -0.216463 |
| 41               | 1                | 0              | 0.874148                | 4.422046  | -1.096801 |
| 42               | 1                | 0              | -0.535336               | 4.330406  | -2.176796 |
| 43               | 1                | 0              | -0.215579               | 5.811213  | -1.251498 |
| 44               | 1                | 0              | 0.470714                | 4.361101  | 1.504917  |
| 45               | 1                | 0              | -0.508075               | 5.835863  | 1.291660  |
| 46               | 1                | 0              | -1.195171               | 4.425143  | 2.123059  |
| 47               | 1                | 0              | -2.433509               | -1.469515 | 1.648771  |

|    |   |   |           |           |           |
|----|---|---|-----------|-----------|-----------|
| 48 | 1 | 0 | -4.239617 | -3.163471 | 1.679819  |
| 49 | 1 | 0 | -6.356117 | -0.957598 | -1.348260 |
| 50 | 1 | 0 | -4.525855 | 0.704395  | -1.411816 |
| 51 | 1 | 0 | 4.028381  | 2.509664  | -0.205678 |
| 52 | 1 | 0 | 6.417128  | 1.841102  | -0.148468 |
| 53 | 1 | 0 | 7.081824  | -0.506625 | -0.635378 |
| 54 | 1 | 0 | 5.320400  | -2.188467 | -1.176448 |
| 55 | 1 | 0 | 2.940524  | -1.526544 | -1.211111 |
| 56 | 1 | 0 | 0.254669  | 0.355396  | 2.227474  |
| 57 | 1 | 0 | -2.318317 | -1.734615 | -2.398906 |
| 58 | 1 | 0 | -1.451735 | -0.199694 | -2.397044 |
| 59 | 1 | 0 | -0.848929 | -1.557683 | -3.361553 |
| 60 | 1 | 0 | 1.650049  | -0.481309 | 4.071506  |
| 61 | 1 | 0 | 2.319966  | -4.160074 | 1.944139  |
| 62 | 1 | 0 | 1.279065  | -4.507155 | -0.251648 |
| 63 | 1 | 0 | 2.699222  | -2.739585 | 3.937090  |
| 64 | 1 | 0 | -6.216751 | -2.909545 | 0.189146  |
| 65 | 6 | 0 | -0.160635 | -3.965468 | -2.465634 |
| 66 | 1 | 0 | 0.272497  | -4.957036 | -2.303376 |
| 67 | 1 | 0 | -1.230635 | -4.093402 | -2.670656 |
| 68 | 1 | 0 | 0.288271  | -3.552196 | -3.378220 |

Compound 1d TS0

Method: b3lyp/6-31g(d) EmpiricalDispersion=GD3 freq

SCF Done: E(RB3LYP) = -1461.59871138 A.U. after 16 cycles

Lowest frequency = -15.1049

Zero-point correction= 0.571158  
(Hartree/Particle)  
Thermal correction to Energy= 0.601860  
Thermal correction to Enthalpy= 0.602804  
Thermal correction to Gibbs Free Energy= 0.511006  
Sum of electronic and zero-point Energies= -1461.027554  
Sum of electronic and thermal Energies= -1460.996852  
Sum of electronic and thermal Enthalpies= -1460.995908  
Sum of electronic and thermal Free Energies= -1461.087706

Standard orientation:

| Center<br>Number | Atomic<br>Number | Atomic<br>Type | Coordinates (Angstroms) |           |           |
|------------------|------------------|----------------|-------------------------|-----------|-----------|
|                  |                  |                | X                       | Y         | Z         |
| 1                | 6                | 0              | 0.014677                | 2.814101  | -0.310874 |
| 2                | 6                | 0              | -0.507987               | 1.555804  | -0.571108 |
| 3                | 6                | 0              | 0.574782                | 0.577484  | -0.552511 |
| 4                | 6                | 0              | 1.710575                | 1.306672  | -0.136193 |
| 5                | 7                | 0              | 1.353821                | 2.649376  | -0.039134 |
| 6                | 6                | 0              | 3.013841                | 0.893235  | 0.435474  |
| 7                | 6                | 0              | 3.028268                | 0.090755  | 1.586148  |
| 8                | 6                | 0              | 4.240377                | 1.316230  | -0.102706 |
| 9                | 6                | 0              | 4.232261                | -0.299011 | 2.168735  |
| 10               | 6                | 0              | 5.446135                | 0.930866  | 0.482000  |
| 11               | 6                | 0              | 5.445423                | 0.118848  | 1.618591  |
| 12               | 6                | 0              | -1.972124               | 1.320434  | -0.415847 |
| 13               | 8                | 0              | -2.854349               | 1.915891  | -1.029340 |
| 14               | 6                | 0              | -0.644829               | 4.178098  | -0.282233 |
| 15               | 6                | 0              | -1.695844               | 4.314946  | 0.838371  |
| 16               | 6                | 0              | -1.225333               | 4.550671  | -1.661861 |

|    |   |   |           |           |           |
|----|---|---|-----------|-----------|-----------|
| 17 | 7 | 0 | -2.245997 | 0.405607  | 0.583259  |
| 18 | 6 | 0 | -3.464972 | -0.228359 | 0.876383  |
| 19 | 1 | 0 | -1.430348 | -0.030765 | 0.991817  |
| 20 | 6 | 0 | 2.218721  | 3.724255  | 0.439011  |
| 21 | 6 | 0 | -3.416915 | -1.363439 | 1.704740  |
| 22 | 6 | 0 | -4.582483 | -2.053296 | 2.023120  |
| 23 | 6 | 0 | -5.814389 | -1.626088 | 1.520740  |
| 24 | 6 | 0 | -5.859327 | -0.498602 | 0.699590  |
| 25 | 6 | 0 | -4.701072 | 0.208110  | 0.373692  |
| 26 | 1 | 0 | 2.083791  | -0.246734 | 2.001693  |
| 27 | 1 | 0 | 4.242643  | 1.925997  | -1.002793 |
| 28 | 1 | 0 | 4.222956  | -0.933784 | 3.050398  |
| 29 | 1 | 0 | 6.385889  | 1.259120  | 0.045908  |
| 30 | 1 | 0 | 0.138226  | 4.911320  | -0.064534 |
| 31 | 1 | 0 | -2.541789 | 3.644658  | 0.673763  |
| 32 | 1 | 0 | -2.081287 | 5.340905  | 0.860745  |
| 33 | 1 | 0 | -1.259873 | 4.093116  | 1.819484  |
| 34 | 1 | 0 | -1.997138 | 3.835928  | -1.952650 |
| 35 | 1 | 0 | -0.440211 | 4.548301  | -2.426978 |
| 36 | 1 | 0 | -1.663616 | 5.555511  | -1.625269 |
| 37 | 1 | 0 | 1.734428  | 4.265897  | 1.255601  |
| 38 | 1 | 0 | 3.147988  | 3.302063  | 0.813523  |
| 39 | 1 | 0 | 2.451431  | 4.427535  | -0.367361 |
| 40 | 1 | 0 | -2.457470 | -1.713316 | 2.079879  |
| 41 | 1 | 0 | -4.524719 | -2.931339 | 2.660878  |
| 42 | 1 | 0 | -6.724695 | -2.165289 | 1.766505  |
| 43 | 1 | 0 | -6.810846 | -0.154715 | 0.302327  |
| 44 | 1 | 0 | -4.736195 | 1.081435  | -0.262194 |
| 45 | 6 | 0 | 0.436134  | -0.877880 | -0.837333 |
| 46 | 6 | 0 | 1.536458  | -1.817564 | -0.673402 |
| 47 | 6 | 0 | -0.780929 | -1.467590 | -1.246506 |
| 48 | 6 | 0 | 2.875887  | -1.515550 | -1.023243 |
| 49 | 6 | 0 | 1.254502  | -3.171030 | -0.304664 |
| 50 | 6 | 0 | -1.063963 | -2.831853 | -0.898958 |
| 51 | 6 | 0 | 3.898579  | -2.424175 | -0.845502 |
| 52 | 1 | 0 | 3.087969  | -0.567052 | -1.493630 |
| 53 | 6 | 0 | 2.327012  | -4.067106 | -0.055260 |
| 54 | 6 | 0 | -0.092441 | -3.614160 | -0.318496 |
| 55 | 6 | 0 | 3.632125  | -3.697243 | -0.297489 |
| 56 | 1 | 0 | 4.909743  | -2.156092 | -1.138250 |
| 57 | 1 | 0 | 2.090497  | -5.076889 | 0.272983  |
| 58 | 1 | 0 | -0.322387 | -4.626574 | 0.006405  |
| 59 | 1 | 0 | 4.443420  | -4.400185 | -0.127763 |
| 60 | 6 | 0 | -1.757441 | -0.798582 | -2.193161 |
| 61 | 1 | 0 | -2.762598 | -0.642996 | -1.790818 |
| 62 | 1 | 0 | -1.385104 | 0.154429  | -2.567890 |
| 63 | 1 | 0 | -1.873350 | -1.461397 | -3.060919 |
| 64 | 1 | 0 | 6.384804  | -0.187524 | 2.070566  |
| 65 | 6 | 0 | -2.442241 | -3.399703 | -1.154638 |
| 66 | 1 | 0 | -3.230508 | -2.770556 | -0.726714 |
| 67 | 1 | 0 | -2.648112 | -3.490042 | -2.229205 |
| 68 | 1 | 0 | -2.534312 | -4.398636 | -0.717322 |

-----

Compound 1d TS180

Method: b3lyp/6-31g(d) EmpiricalDispersion=GD3 opt(ts,noeigentest,addredun)

SCF Done: E(RB3LYP) = -1461.59746490 A.U. after 1 cycles

Lowest frequency = -19.3144



Zero-point correction= 0.571015  
 (Hartree/Particle)  
 Thermal correction to Energy= 0.601744  
 Thermal correction to Enthalpy= 0.602688  
 Thermal correction to Gibbs Free Energy= 0.510860  
 Sum of electronic and zero-point Energies= -1461.026450  
 Sum of electronic and thermal Energies= -1460.995721  
 Sum of electronic and thermal Enthalpies= -1460.994777  
 Sum of electronic and thermal Free Energies= -1461.086605

Standard orientation:

| Center<br>Number | Atomic<br>Number | Atomic<br>Type | Coordinates (Angstroms) |           |           |
|------------------|------------------|----------------|-------------------------|-----------|-----------|
|                  |                  |                | X                       | Y         | Z         |
| 1                | 6                | 0              | 0.898893                | 2.614517  | -0.277092 |
| 2                | 6                | 0              | 0.109148                | 1.489705  | -0.465142 |
| 3                | 6                | 0              | 0.969019                | 0.309333  | -0.520264 |
| 4                | 6                | 0              | 2.260969                | 0.795193  | -0.228255 |
| 5                | 7                | 0              | 2.196920                | 2.182141  | -0.131626 |
| 6                | 6                | 0              | 3.474819                | 0.122652  | 0.289097  |
| 7                | 6                | 0              | 3.384684                | -0.571830 | 1.505315  |
| 8                | 6                | 0              | 4.722749                | 0.199174  | -0.349060 |
| 9                | 6                | 0              | 4.505273                | -1.192791 | 2.056730  |
| 10               | 6                | 0              | 5.846095                | -0.413982 | 0.204704  |
| 11               | 6                | 0              | 5.740047                | -1.115413 | 1.408129  |
| 12               | 6                | 0              | -1.368280               | 1.589635  | -0.254600 |
| 13               | 8                | 0              | -2.102457               | 2.361244  | -0.867546 |
| 14               | 6                | 0              | 0.543009                | 4.085665  | -0.206212 |
| 15               | 6                | 0              | -0.424859               | 4.422354  | 0.946577  |
| 16               | 6                | 0              | 0.018710                | 4.602731  | -1.561572 |
| 17               | 7                | 0              | -1.805192               | 0.807988  | 0.796409  |
| 18               | 6                | 0              | -3.126978               | 0.430006  | 1.103706  |
| 19               | 1                | 0              | -1.095818               | 0.197244  | 1.179780  |
| 20               | 6                | 0              | 3.310111                | 3.061686  | 0.209895  |
| 21               | 6                | 0              | -3.298625               | -0.708970 | 1.906260  |
| 22               | 6                | 0              | -4.574898               | -1.153405 | 2.235929  |
| 23               | 6                | 0              | -5.700798               | -0.470317 | 1.770680  |
| 24               | 6                | 0              | -5.527392               | 0.665599  | 0.978655  |
| 25               | 6                | 0              | -4.254399               | 1.127999  | 0.644670  |
| 26               | 1                | 0              | 2.420943                | -0.636441 | 2.001534  |
| 27               | 1                | 0              | 4.800597                | 0.722279  | -1.298719 |
| 28               | 1                | 0              | 4.415160                | -1.733152 | 2.995312  |
| 29               | 1                | 0              | 6.802218                | -0.352103 | -0.307959 |
| 30               | 1                | 0              | 1.468660                | 4.632005  | 0.002667  |
| 31               | 1                | 0              | -1.416168               | 4.000834  | 0.770997  |
| 32               | 1                | 0              | -0.532194               | 5.510152  | 1.029972  |
| 33               | 1                | 0              | -0.048482               | 4.042534  | 1.903359  |
| 34               | 1                | 0              | -0.908993               | 4.091050  | -1.823982 |
| 35               | 1                | 0              | 0.752176                | 4.424619  | -2.356847 |
| 36               | 1                | 0              | -0.169266               | 5.681993  | -1.505662 |
| 37               | 1                | 0              | 3.075193                | 3.647724  | 1.103049  |
| 38               | 1                | 0              | 4.195131                | 2.464945  | 0.416010  |
| 39               | 1                | 0              | 3.531520                | 3.744706  | -0.616343 |
| 40               | 1                | 0              | -2.425830               | -1.262055 | 2.246446  |
| 41               | 1                | 0              | -4.687954               | -2.042158 | 2.851266  |
| 42               | 1                | 0              | -6.698300               | -0.818018 | 2.024483  |
| 43               | 1                | 0              | -6.394980               | 1.208556  | 0.612202  |
| 44               | 1                | 0              | -4.120430               | 2.003068  | 0.025543  |

|    |   |   |           |           |           |
|----|---|---|-----------|-----------|-----------|
| 45 | 6 | 0 | 0.520735  | -1.092921 | -0.757113 |
| 46 | 6 | 0 | -0.871665 | -1.368335 | -1.091071 |
| 47 | 6 | 0 | 1.335990  | -2.240740 | -0.651592 |
| 48 | 6 | 0 | -1.656064 | -0.512821 | -1.909770 |
| 49 | 6 | 0 | -1.457631 | -2.616478 | -0.706842 |
| 50 | 6 | 0 | 0.750283  | -3.490375 | -0.263016 |
| 51 | 6 | 0 | -2.979550 | -0.787977 | -2.182404 |
| 52 | 1 | 0 | -1.200225 | 0.364141  | -2.351435 |
| 53 | 6 | 0 | -2.837093 | -2.850221 | -0.951005 |
| 54 | 6 | 0 | -0.616450 | -3.625972 | -0.178554 |
| 55 | 6 | 0 | -3.594832 | -1.945694 | -1.658174 |
| 56 | 1 | 0 | -3.547443 | -0.105065 | -2.807104 |
| 57 | 1 | 0 | -3.272471 | -3.783203 | -0.600505 |
| 58 | 1 | 0 | -1.057757 | -4.556669 | 0.171725  |
| 59 | 1 | 0 | -4.648368 | -2.134596 | -1.842734 |
| 60 | 6 | 0 | 2.776557  | -2.294518 | -1.112070 |
| 61 | 1 | 0 | 3.053685  | -1.391756 | -1.652169 |
| 62 | 1 | 0 | 3.516026  | -2.469540 | -0.325011 |
| 63 | 1 | 0 | 2.863818  | -3.128915 | -1.820285 |
| 64 | 1 | 0 | 6.613848  | -1.598160 | 1.837050  |
| 65 | 6 | 0 | 1.646235  | -4.665022 | 0.061833  |
| 66 | 1 | 0 | 2.128208  | -5.070470 | -0.837671 |
| 67 | 1 | 0 | 2.451651  | -4.389093 | 0.753436  |
| 68 | 1 | 0 | 1.070514  | -5.476113 | 0.518249  |

Compound 1e GS1

Method: b3lyp/6-31g(d) EmpiricalDispersion=GD3 opt freq

SCF Done: E(RB3LYP) = -1497.53819675 A.U. after 1 cycles

Lowest frequency = 18.6291

Zero-point correction= 0.547965  
(Hartree/Particle)  
Thermal correction to Energy= 0.579555  
Thermal correction to Enthalpy= 0.580499  
Thermal correction to Gibbs Free Energy= 0.484498  
Sum of electronic and zero-point Energies= -1496.990232  
Sum of electronic and thermal Energies= -1496.958642  
Sum of electronic and thermal Enthalpies= -1496.957698  
Sum of electronic and thermal Free Energies= -1497.053699

Standard orientation:

| Center<br>Number | Atomic<br>Number | Atomic<br>Type | Coordinates (Angstroms) |           |           |
|------------------|------------------|----------------|-------------------------|-----------|-----------|
|                  |                  |                | X                       | Y         | Z         |
| 1                | 6                | 0              | -1.968309               | 1.055812  | 0.115889  |
| 2                | 6                | 0              | 3.451829                | -0.136174 | -0.588657 |
| 3                | 7                | 0              | -1.901536               | 2.418361  | -0.165309 |
| 4                | 6                | 0              | -0.677937               | 0.552014  | 0.065631  |
| 5                | 6                | 0              | 0.194028                | 1.653827  | -0.244486 |
| 6                | 6                | 0              | 1.674037                | 1.600771  | -0.276854 |
| 7                | 8                | 0              | 2.396968                | 2.506353  | 0.139848  |
| 8                | 6                | 0              | -0.592126               | 2.794422  | -0.382079 |
| 9                | 6                | 0              | -3.022749               | 3.346599  | -0.080804 |
| 10               | 6                | 0              | -0.232210               | 4.227950  | -0.696995 |
| 11               | 6                | 0              | 0.296825                | 4.952319  | 0.558386  |
| 12               | 6                | 0              | 0.752293                | 4.354021  | -1.874398 |
| 13               | 6                | 0              | 3.571629                | -1.529456 | -0.735267 |

|    |   |   |           |           |           |
|----|---|---|-----------|-----------|-----------|
| 14 | 6 | 0 | 4.794921  | -2.157385 | -0.518591 |
| 15 | 6 | 0 | 5.915658  | -1.411361 | -0.145687 |
| 16 | 6 | 0 | 5.793610  | -0.028350 | -0.000298 |
| 17 | 6 | 0 | 4.577712  | 0.619063  | -0.223083 |
| 18 | 6 | 0 | -0.284512 | -0.855510 | 0.320334  |
| 19 | 6 | 0 | -0.751108 | -1.932181 | -0.501332 |
| 20 | 6 | 0 | 0.601440  | -1.138490 | 1.362825  |
| 21 | 6 | 0 | -1.588421 | -1.722786 | -1.634770 |
| 22 | 6 | 0 | -0.341953 | -3.278097 | -0.210459 |
| 23 | 6 | 0 | 1.011093  | -2.465460 | 1.638870  |
| 24 | 6 | 0 | -2.018854 | -2.777162 | -2.406695 |
| 25 | 6 | 0 | -0.812180 | -4.344484 | -1.024120 |
| 26 | 6 | 0 | 0.537962  | -3.506915 | 0.875234  |
| 27 | 6 | 0 | -1.637629 | -4.105885 | -2.097376 |
| 28 | 7 | 0 | 2.180475  | 0.426890  | -0.806448 |
| 29 | 1 | 0 | 1.481084  | -0.238033 | -1.109967 |
| 30 | 8 | 0 | 1.040817  | -0.071559 | 2.087440  |
| 31 | 6 | 0 | 2.253386  | -0.189514 | 2.826865  |
| 32 | 1 | 0 | -3.341091 | 3.684243  | -1.073490 |
| 33 | 1 | 0 | -2.745801 | 4.217694  | 0.518103  |
| 34 | 1 | 0 | -3.860881 | 2.847180  | 0.403724  |
| 35 | 1 | 0 | -1.154415 | 4.732264  | -1.011822 |
| 36 | 1 | 0 | 1.214367  | 4.466285  | 0.897989  |
| 37 | 1 | 0 | 0.509248  | 6.004208  | 0.331580  |
| 38 | 1 | 0 | -0.435503 | 4.920080  | 1.374380  |
| 39 | 1 | 0 | 1.730600  | 3.946129  | -1.614298 |
| 40 | 1 | 0 | 0.376705  | 3.829018  | -2.759859 |
| 41 | 1 | 0 | 0.882695  | 5.411312  | -2.133378 |
| 42 | 1 | 0 | 2.696324  | -2.118842 | -0.998755 |
| 43 | 1 | 0 | 4.867453  | -3.235673 | -0.634409 |
| 44 | 1 | 0 | 6.869807  | -1.901333 | 0.026780  |
| 45 | 1 | 0 | 6.658475  | 0.564917  | 0.285772  |
| 46 | 1 | 0 | 4.482081  | 1.689401  | -0.109370 |
| 47 | 1 | 0 | -1.885028 | -0.711097 | -1.884444 |
| 48 | 1 | 0 | -2.658299 | -2.588235 | -3.264931 |
| 49 | 1 | 0 | -0.499334 | -5.357728 | -0.781676 |
| 50 | 1 | 0 | 0.849818  | -4.525076 | 1.095285  |
| 51 | 1 | 0 | -1.990863 | -4.928706 | -2.712704 |
| 52 | 1 | 0 | 3.049452  | -0.630962 | 2.216359  |
| 53 | 1 | 0 | 2.530594  | 0.832084  | 3.091742  |
| 54 | 1 | 0 | 2.112730  | -0.780168 | 3.742061  |
| 55 | 1 | 0 | 1.695368  | -2.659934 | 2.456434  |
| 56 | 6 | 0 | -3.217041 | 0.334517  | 0.406077  |
| 57 | 6 | 0 | -4.340104 | 0.432713  | -0.434440 |
| 58 | 6 | 0 | -3.282674 | -0.528128 | 1.513471  |
| 59 | 6 | 0 | -5.496781 | -0.298976 | -0.168476 |
| 60 | 1 | 0 | -4.293882 | 1.069022  | -1.314429 |
| 61 | 6 | 0 | -4.433866 | -1.269818 | 1.769451  |
| 62 | 1 | 0 | -2.419095 | -0.611642 | 2.165485  |
| 63 | 6 | 0 | -5.546980 | -1.155183 | 0.933201  |
| 64 | 1 | 0 | -6.353694 | -0.211480 | -0.831301 |
| 65 | 1 | 0 | -4.464311 | -1.934746 | 2.628486  |
| 66 | 1 | 0 | -6.445400 | -1.731592 | 1.136443  |

-----

Compound 1e GS2

Method: b3lyp/6-31g(d) EmpiricalDispersion=GD3 opt freq

SCF Done: E(RB3LYP) = -1497.53553176 A.U. after 1 cycles

Lowest frequency = 16.2038

Zero-point correction= 0.547873  
 (Hartree/Particle)  
 Thermal correction to Energy= 0.579577  
 Thermal correction to Enthalpy= 0.580521  
 Thermal correction to Gibbs Free Energy= 0.483231  
 Sum of electronic and zero-point Energies= -1496.987659  
 Sum of electronic and thermal Energies= -1496.955955  
 Sum of electronic and thermal Enthalpies= -1496.955010  
 Sum of electronic and thermal Free Energies= -1497.052301

Standard orientation:

| Center<br>Number | Atomic<br>Number | Atomic<br>Type | Coordinates (Angstroms) |           |           |
|------------------|------------------|----------------|-------------------------|-----------|-----------|
|                  |                  |                | X                       | Y         | Z         |
| 1                | 6                | 0              | 1.846947                | 1.087020  | -0.415468 |
| 2                | 6                | 0              | -3.693923               | -0.065445 | -0.210029 |
| 3                | 7                | 0              | 1.693743                | 2.463283  | -0.278787 |
| 4                | 6                | 0              | 0.609214                | 0.501004  | -0.211393 |
| 5                | 6                | 0              | -0.319354               | 1.560179  | 0.068415  |
| 6                | 6                | 0              | -1.752931               | 1.401723  | 0.419728  |
| 7                | 8                | 0              | -2.309977               | 2.055897  | 1.303234  |
| 8                | 6                | 0              | 0.379561                | 2.764552  | 0.017250  |
| 9                | 6                | 0              | 2.721782                | 3.451040  | -0.583358 |
| 10               | 6                | 0              | -0.072483               | 4.189528  | 0.237071  |
| 11               | 6                | 0              | -0.206674               | 4.490792  | 1.745162  |
| 12               | 6                | 0              | -1.366809               | 4.535737  | -0.521695 |
| 13               | 6                | 0              | -4.041377               | -1.137120 | -1.051164 |
| 14               | 6                | 0              | -5.306616               | -1.711465 | -0.981733 |
| 15               | 6                | 0              | -6.248858               | -1.231873 | -0.069037 |
| 16               | 6                | 0              | -5.901929               | -0.170355 | 0.768233  |
| 17               | 6                | 0              | -4.639553               | 0.420418  | 0.708054  |
| 18               | 6                | 0              | 0.401553                | -0.965826 | -0.093772 |
| 19               | 6                | 0              | 0.786665                | -1.650773 | 1.100590  |
| 20               | 6                | 0              | -0.122608               | -1.704208 | -1.146211 |
| 21               | 6                | 0              | 1.313764                | -0.962442 | 2.229308  |
| 22               | 6                | 0              | 0.646955                | -3.076030 | 1.180802  |
| 23               | 6                | 0              | -0.272271               | -3.108698 | -1.070502 |
| 24               | 6                | 0              | 1.687686                | -1.646213 | 3.363248  |
| 25               | 6                | 0              | 1.045908                | -3.751021 | 2.366156  |
| 26               | 6                | 0              | 0.113383                | -3.773711 | 0.070749  |
| 27               | 6                | 0              | 1.557726                | -3.055226 | 3.435911  |
| 28               | 7                | 0              | -2.396383               | 0.456116  | -0.347150 |
| 29               | 1                | 0              | -1.855358               | 0.074688  | -1.115828 |
| 30               | 8                | 0              | -0.512799               | -0.974554 | -2.252707 |
| 31               | 6                | 0              | -0.844753               | -1.664915 | -3.451294 |
| 32               | 1                | 0              | 3.626963                | 2.934574  | -0.899234 |
| 33               | 1                | 0              | 2.396313                | 4.108693  | -1.395252 |
| 34               | 1                | 0              | 2.952272                | 4.061230  | 0.295801  |
| 35               | 1                | 0              | 0.708904                | 4.848338  | -0.160684 |
| 36               | 1                | 0              | -0.975113               | 3.846827  | 2.179065  |
| 37               | 1                | 0              | -0.485647               | 5.540135  | 1.901224  |
| 38               | 1                | 0              | 0.739351                | 4.307330  | 2.268902  |
| 39               | 1                | 0              | -2.217529               | 3.982108  | -0.119700 |
| 40               | 1                | 0              | -1.271946               | 4.306996  | -1.589233 |
| 41               | 1                | 0              | -1.580591               | 5.606039  | -0.418727 |
| 42               | 1                | 0              | -3.305079               | -1.521961 | -1.752325 |
| 43               | 1                | 0              | -5.554040               | -2.539914 | -1.640751 |

|    |   |   |           |           |           |
|----|---|---|-----------|-----------|-----------|
| 44 | 1 | 0 | -7.236986 | -1.679632 | -0.011760 |
| 45 | 1 | 0 | -6.625074 | 0.213270  | 1.483599  |
| 46 | 1 | 0 | -4.373987 | 1.244447  | 1.354436  |
| 47 | 1 | 0 | 1.407951  | 0.116851  | 2.184247  |
| 48 | 1 | 0 | 2.083434  | -1.100002 | 4.215403  |
| 49 | 1 | 0 | 0.935735  | -4.832203 | 2.410959  |
| 50 | 1 | 0 | 0.002740  | -4.853670 | 0.129864  |
| 51 | 1 | 0 | 1.858473  | -3.580302 | 4.338352  |
| 52 | 1 | 0 | -1.011436 | -0.890209 | -4.201866 |
| 53 | 1 | 0 | -1.759833 | -2.261593 | -3.342370 |
| 54 | 1 | 0 | -0.024131 | -2.317912 | -3.773718 |
| 55 | 1 | 0 | -0.688471 | -3.664312 | -1.902619 |
| 56 | 6 | 0 | 3.130433  | 0.410572  | -0.654384 |
| 57 | 6 | 0 | 4.258634  | 0.656139  | 0.147458  |
| 58 | 6 | 0 | 3.225474  | -0.555994 | -1.669793 |
| 59 | 6 | 0 | 5.450244  | -0.034628 | -0.069462 |
| 60 | 1 | 0 | 4.188012  | 1.374419  | 0.960047  |
| 61 | 6 | 0 | 4.412408  | -1.256295 | -1.875695 |
| 62 | 1 | 0 | 2.356724  | -0.743707 | -2.292965 |
| 63 | 6 | 0 | 5.530607  | -0.994952 | -1.080194 |
| 64 | 1 | 0 | 6.311619  | 0.165453  | 0.562360  |
| 65 | 1 | 0 | 4.467485  | -2.002982 | -2.663589 |
| 66 | 1 | 0 | 6.457088  | -1.538626 | -1.243995 |

Compound 1e GS3

Method: b3lyp/6-31g(d) EmpiricalDispersion=GD3 opt freq

SCF Done: E(RB3LYP) = -1497.53462281 A.U. after 1 cycles

Lowest frequency = 16.4146

Zero-point correction= 0.547841  
(Hartree/Particle)  
Thermal correction to Energy= 0.579580  
Thermal correction to Enthalpy= 0.580524  
Thermal correction to Gibbs Free Energy= 0.483423  
Sum of electronic and zero-point Energies= -1496.986782  
Sum of electronic and thermal Energies= -1496.955043  
Sum of electronic and thermal Enthalpies= -1496.954099  
Sum of electronic and thermal Free Energies= -1497.051200

Standard orientation:

| Center<br>Number | Atomic<br>Number | Atomic<br>Type | Coordinates (Angstroms) |           |           |
|------------------|------------------|----------------|-------------------------|-----------|-----------|
|                  |                  |                | X                       | Y         | Z         |
| 1                | 6                | 0              | 1.999500                | 0.940165  | -0.110596 |
| 2                | 6                | 0              | -3.565963               | 0.203938  | -0.506086 |
| 3                | 7                | 0              | 1.927673                | 2.322779  | 0.047393  |
| 4                | 6                | 0              | 0.716263                | 0.437078  | 0.028337  |
| 5                | 6                | 0              | -0.152905               | 1.551756  | 0.271618  |
| 6                | 6                | 0              | -1.624277               | 1.480337  | 0.460224  |
| 7                | 8                | 0              | -2.231247               | 2.101547  | 1.333646  |
| 8                | 6                | 0              | 0.624913                | 2.705551  | 0.290093  |
| 9                | 6                | 0              | 3.076551                | 3.217835  | 0.119752  |
| 10               | 6                | 0              | 0.253156                | 4.148914  | 0.536338  |
| 11               | 6                | 0              | 0.018124                | 4.404218  | 2.039711  |
| 12               | 6                | 0              | -0.956616               | 4.603705  | -0.302017 |
| 13               | 6                | 0              | -3.872494               | -0.769795 | -1.472687 |
| 14               | 6                | 0              | -5.166201               | -1.268225 | -1.588890 |

|    |   |   |           |           |           |
|----|---|---|-----------|-----------|-----------|
| 15 | 6 | 0 | -6.176912 | -0.808954 | -0.741126 |
| 16 | 6 | 0 | -5.870016 | 0.155267  | 0.220391  |
| 17 | 6 | 0 | -4.579466 | 0.669685  | 0.347119  |
| 18 | 6 | 0 | 0.349917  | -1.001708 | -0.013492 |
| 19 | 6 | 0 | 0.375400  | -1.793031 | 1.175075  |
| 20 | 6 | 0 | -0.020702 | -1.602623 | -1.209529 |
| 21 | 6 | 0 | 0.697693  | -1.234759 | 2.444825  |
| 22 | 6 | 0 | 0.075102  | -3.193671 | 1.106080  |
| 23 | 6 | 0 | -0.318308 | -2.984561 | -1.284904 |
| 24 | 6 | 0 | 0.731243  | -2.020570 | 3.574572  |
| 25 | 6 | 0 | 0.121679  | -3.975606 | 2.291796  |
| 26 | 6 | 0 | -0.259208 | -3.758137 | -0.148574 |
| 27 | 6 | 0 | 0.444094  | -3.406265 | 3.501546  |
| 28 | 7 | 0 | -2.235846 | 0.653242  | -0.456307 |
| 29 | 1 | 0 | -1.632670 | 0.299583  | -1.190461 |
| 30 | 8 | 0 | -0.141930 | -0.755592 | -2.288544 |
| 31 | 6 | 0 | -0.320484 | -1.311708 | -3.584680 |
| 32 | 1 | 0 | 3.988707  | 2.622957  | 0.144754  |
| 33 | 1 | 0 | 3.118177  | 3.886575  | -0.746945 |
| 34 | 1 | 0 | 3.028843  | 3.821025  | 1.030572  |
| 35 | 1 | 0 | 1.102097  | 4.766525  | 0.218070  |
| 36 | 1 | 0 | -0.819910 | 3.793456  | 2.385207  |
| 37 | 1 | 0 | -0.210384 | 5.462026  | 2.218444  |
| 38 | 1 | 0 | 0.905089  | 4.142105  | 2.629544  |
| 39 | 1 | 0 | -1.869056 | 4.095662  | 0.016685  |
| 40 | 1 | 0 | -0.796806 | 4.402720  | -1.367271 |
| 41 | 1 | 0 | -1.109019 | 5.682014  | -0.175868 |
| 42 | 1 | 0 | -3.083281 | -1.139614 | -2.123579 |
| 43 | 1 | 0 | -5.382766 | -2.021764 | -2.341919 |
| 44 | 1 | 0 | -7.187433 | -1.197901 | -0.829068 |
| 45 | 1 | 0 | -6.646938 | 0.521513  | 0.886780  |
| 46 | 1 | 0 | -4.343219 | 1.418719  | 1.089367  |
| 47 | 1 | 0 | 0.907358  | -0.172072 | 2.507197  |
| 48 | 1 | 0 | 0.974122  | -1.573100 | 4.534673  |
| 49 | 1 | 0 | -0.106639 | -5.036915 | 2.223829  |
| 50 | 1 | 0 | -0.484715 | -4.820173 | -0.205923 |
| 51 | 1 | 0 | 0.474419  | -4.012868 | 4.402384  |
| 52 | 1 | 0 | -0.288609 | -0.467145 | -4.275405 |
| 53 | 1 | 0 | -1.289607 | -1.819086 | -3.683304 |
| 54 | 1 | 0 | 0.484634  | -2.015410 | -3.830043 |
| 55 | 1 | 0 | -0.596643 | -3.437027 | -2.229437 |
| 56 | 6 | 0 | 3.235952  | 0.226148  | -0.470744 |
| 57 | 6 | 0 | 3.643778  | -0.913924 | 0.242395  |
| 58 | 6 | 0 | 4.011463  | 0.640689  | -1.569188 |
| 59 | 6 | 0 | 4.787371  | -1.616574 | -0.134921 |
| 60 | 1 | 0 | 3.063186  | -1.241868 | 1.097460  |
| 61 | 6 | 0 | 5.162651  | -0.054817 | -1.935842 |
| 62 | 1 | 0 | 3.692149  | 1.502860  | -2.148804 |
| 63 | 6 | 0 | 5.554029  | -1.189081 | -1.221056 |
| 64 | 1 | 0 | 5.084687  | -2.496755 | 0.429136  |
| 65 | 1 | 0 | 5.746811  | 0.282002  | -2.788430 |
| 66 | 1 | 0 | 6.448072  | -1.735493 | -1.509295 |

-----

Compound 1e GS4

Method: b3lyp/6-31g(d) EmpiricalDispersion=GD3 opt freq

SCF Done: E(RB3LYP) = -1497.53657466 A.U. after 1 cycles

Lowest frequency = 18.5769

Zero-point correction= 0.547862  
 (Hartree/Particle)  
 Thermal correction to Energy= 0.579543  
 Thermal correction to Enthalpy= 0.580487  
 Thermal correction to Gibbs Free Energy= 0.484041  
 Sum of electronic and zero-point Energies= -1496.988712  
 Sum of electronic and thermal Energies= -1496.957032  
 Sum of electronic and thermal Enthalpies= -1496.956088  
 Sum of electronic and thermal Free Energies= -1497.052534

Standard orientation:

| Center<br>Number | Atomic<br>Number | Atomic<br>Type | Coordinates (Angstroms) |           |           |
|------------------|------------------|----------------|-------------------------|-----------|-----------|
|                  |                  |                | X                       | Y         | Z         |
| 1                | 6                | 0              | -1.973259               | 0.870750  | 0.147380  |
| 2                | 6                | 0              | 3.549545                | 0.153102  | -0.611291 |
| 3                | 7                | 0              | -2.008544               | 2.240869  | -0.112717 |
| 4                | 6                | 0              | -0.654065               | 0.453796  | 0.064159  |
| 5                | 6                | 0              | 0.129901                | 1.616175  | -0.250056 |
| 6                | 6                | 0              | 1.604276                | 1.708381  | -0.335564 |
| 7                | 8                | 0              | 2.232294                | 2.715840  | -0.006629 |
| 8                | 6                | 0              | -0.732090               | 2.703864  | -0.353890 |
| 9                | 6                | 0              | -3.206590               | 3.062984  | 0.008291  |
| 10               | 6                | 0              | -0.360580               | 4.134956  | -0.664269 |
| 11               | 6                | 0              | -1.214416               | 4.804576  | -1.758494 |
| 12               | 6                | 0              | -0.260945               | 4.991821  | 0.613794  |
| 13               | 6                | 0              | 3.820475                | -1.223229 | -0.715057 |
| 14               | 6                | 0              | 5.110299                | -1.704765 | -0.508930 |
| 15               | 6                | 0              | 6.149623                | -0.827328 | -0.190396 |
| 16               | 6                | 0              | 5.877964                | 0.538207  | -0.088630 |
| 17               | 6                | 0              | 4.593338                | 1.039845  | -0.300700 |
| 18               | 6                | 0              | -0.161779               | -0.926591 | 0.292920  |
| 19               | 6                | 0              | -0.572137               | -2.022528 | -0.533638 |
| 20               | 6                | 0              | 0.756723                | -1.162597 | 1.319414  |
| 21               | 6                | 0              | -1.445436               | -1.856342 | -1.646697 |
| 22               | 6                | 0              | -0.069722               | -3.341407 | -0.267521 |
| 23               | 6                | 0              | 1.260054                | -2.462616 | 1.568963  |
| 24               | 6                | 0              | -1.821909               | -2.928435 | -2.422355 |
| 25               | 6                | 0              | -0.485005               | -4.427636 | -1.084768 |
| 26               | 6                | 0              | 0.844291                | -3.523585 | 0.798605  |
| 27               | 6                | 0              | -1.347028               | -4.232302 | -2.137762 |
| 28               | 7                | 0              | 2.219302                | 0.563348  | -0.812496 |
| 29               | 1                | 0              | 1.587151                | -0.189460 | -1.052212 |
| 30               | 8                | 0              | 1.133141                | -0.078368 | 2.053881  |
| 31               | 6                | 0              | 2.348388                | -0.135007 | 2.795779  |
| 32               | 1                | 0              | -3.672918               | 3.244397  | -0.965800 |
| 33               | 1                | 0              | -2.954313               | 4.020445  | 0.463333  |
| 34               | 1                | 0              | -3.924858               | 2.552101  | 0.649981  |
| 35               | 1                | 0              | 0.658586                | 4.070365  | -1.053212 |
| 36               | 1                | 0              | -2.214228               | 5.084243  | -1.413143 |
| 37               | 1                | 0              | -0.721471               | 5.725647  | -2.089666 |
| 38               | 1                | 0              | -1.326422               | 4.150428  | -2.630602 |
| 39               | 1                | 0              | -1.223845               | 5.089212  | 1.129587  |
| 40               | 1                | 0              | 0.458376                | 4.539061  | 1.301648  |
| 41               | 1                | 0              | 0.086266                | 6.001820  | 0.364932  |
| 42               | 1                | 0              | 3.010950                | -1.914366 | -0.938827 |
| 43               | 1                | 0              | 5.299379                | -2.771950 | -0.591759 |
| 44               | 1                | 0              | 7.155856                | -1.202808 | -0.026958 |

|    |   |   |           |           |           |
|----|---|---|-----------|-----------|-----------|
| 45 | 1 | 0 | 6.677961  | 1.233005  | 0.154524  |
| 46 | 1 | 0 | 4.382452  | 2.096785  | -0.221779 |
| 47 | 1 | 0 | -1.813207 | -0.863783 | -1.877647 |
| 48 | 1 | 0 | -2.490898 | -2.772944 | -3.264624 |
| 49 | 1 | 0 | -0.100820 | -5.420498 | -0.861359 |
| 50 | 1 | 0 | 1.227649  | -4.521133 | 0.999355  |
| 51 | 1 | 0 | -1.658146 | -5.069775 | -2.756046 |
| 52 | 1 | 0 | 3.174583  | -0.503839 | 2.176882  |
| 53 | 1 | 0 | 2.554351  | 0.894528  | 3.093085  |
| 54 | 1 | 0 | 2.245873  | -0.759655 | 3.693329  |
| 55 | 1 | 0 | 1.969917  | -2.622269 | 2.372010  |
| 56 | 6 | 0 | -3.164296 | 0.065950  | 0.459955  |
| 57 | 6 | 0 | -4.316855 | 0.106426  | -0.344374 |
| 58 | 6 | 0 | -3.141566 | -0.816871 | 1.553278  |
| 59 | 6 | 0 | -5.415700 | -0.702468 | -0.058289 |
| 60 | 1 | 0 | -4.339686 | 0.760557  | -1.211855 |
| 61 | 6 | 0 | -4.234898 | -1.634881 | 1.829499  |
| 62 | 1 | 0 | -2.255582 | -0.854846 | 2.178893  |
| 63 | 6 | 0 | -5.377789 | -1.578495 | 1.028261  |
| 64 | 1 | 0 | -6.296528 | -0.658600 | -0.693525 |
| 65 | 1 | 0 | -4.196909 | -2.313940 | 2.677110  |
| 66 | 1 | 0 | -6.231177 | -2.214538 | 1.247125  |

Compound 1e GS5

Method: b3lyp/6-31g(d) EmpiricalDispersion=GD3 opt freq

SCF Done: E(RB3LYP) = -1497.53450845 A.U. after 1 cycles

Lowest frequency = 13.6775

Zero-point correction= 0.547580  
(Hartree/Particle)  
Thermal correction to Energy= 0.579451  
Thermal correction to Enthalpy= 0.580395  
Thermal correction to Gibbs Free Energy= 0.482289  
Sum of electronic and zero-point Energies= -1496.986928  
Sum of electronic and thermal Energies= -1496.955057  
Sum of electronic and thermal Enthalpies= -1496.954113  
Sum of electronic and thermal Free Energies= -1497.052219

Standard orientation:

| Center<br>Number | Atomic<br>Number | Atomic<br>Type | Coordinates (Angstroms) |           |           |
|------------------|------------------|----------------|-------------------------|-----------|-----------|
|                  |                  |                | X                       | Y         | Z         |
| 1                | 6                | 0              | -2.152544               | 0.651503  | -0.383682 |
| 2                | 6                | 0              | 3.518034                | 0.498329  | 0.030204  |
| 3                | 7                | 0              | -2.239922               | 2.018835  | -0.627277 |
| 4                | 6                | 0              | -0.825010               | 0.351465  | -0.142609 |
| 5                | 6                | 0              | -0.085212               | 1.584050  | -0.219701 |
| 6                | 6                | 0              | 1.350188                | 1.781931  | 0.108551  |
| 7                | 8                | 0              | 1.779198                | 2.795571  | 0.664072  |
| 8                | 6                | 0              | -0.991100               | 2.598472  | -0.532360 |
| 9                | 6                | 0              | -3.437138               | 2.703033  | -1.101627 |
| 10               | 6                | 0              | -0.803078               | 4.082055  | -0.753343 |
| 11               | 6                | 0              | -0.704369               | 4.829599  | 0.593475  |
| 12               | 6                | 0              | 0.386520                | 4.413082  | -1.672814 |
| 13               | 6                | 0              | 4.038406                | -0.751725 | -0.351841 |



|    |   |   |           |           |           |
|----|---|---|-----------|-----------|-----------|
| 14 | 6 | 0 | 5.370651  | -1.064508 | -0.100840 |
| 15 | 6 | 0 | 6.205762  | -0.143079 | 0.535998  |
| 16 | 6 | 0 | 5.685685  | 1.095520  | 0.914421  |
| 17 | 6 | 0 | 4.353592  | 1.429550  | 0.667386  |
| 18 | 6 | 0 | -0.328515 | -0.976103 | 0.295737  |
| 19 | 6 | 0 | 0.275619  | -1.884373 | -0.623152 |
| 20 | 6 | 0 | -0.424138 | -1.332240 | 1.638659  |
| 21 | 6 | 0 | 0.387409  | -1.585796 | -2.013731 |
| 22 | 6 | 0 | 0.822954  | -3.123817 | -0.152225 |
| 23 | 6 | 0 | 0.090379  | -2.572097 | 2.100185  |
| 24 | 6 | 0 | 1.027740  | -2.448892 | -2.876230 |
| 25 | 6 | 0 | 1.472713  | -3.991060 | -1.069869 |
| 26 | 6 | 0 | 0.705029  | -3.435616 | 1.223993  |
| 27 | 6 | 0 | 1.582844  | -3.662783 | -2.402792 |
| 28 | 7 | 0 | 2.162510  | 0.732621  | -0.260757 |
| 29 | 1 | 0 | 1.715119  | -0.017100 | -0.768115 |
| 30 | 8 | 0 | -1.023441 | -0.424533 | 2.457090  |
| 31 | 6 | 0 | -1.132591 | -0.707975 | 3.843165  |
| 32 | 1 | 0 | -3.264244 | 3.144875  | -2.087843 |
| 33 | 1 | 0 | -3.738040 | 3.493738  | -0.407115 |
| 34 | 1 | 0 | -4.248317 | 1.981350  | -1.184515 |
| 35 | 1 | 0 | -1.700473 | 4.451330  | -1.264179 |
| 36 | 1 | 0 | 0.178963  | 4.488372  | 1.137192  |
| 37 | 1 | 0 | -0.627757 | 5.910598  | 0.423284  |
| 38 | 1 | 0 | -1.590304 | 4.642955  | 1.212476  |
| 39 | 1 | 0 | 1.334050  | 4.152988  | -1.198130 |
| 40 | 1 | 0 | 0.310460  | 3.874591  | -2.624404 |
| 41 | 1 | 0 | 0.397596  | 5.487894  | -1.888878 |
| 42 | 1 | 0 | 3.391496  | -1.477991 | -0.839879 |
| 43 | 1 | 0 | 5.755036  | -2.035537 | -0.402647 |
| 44 | 1 | 0 | 7.245924  | -0.387522 | 0.732795  |
| 45 | 1 | 0 | 6.324484  | 1.822943  | 1.409212  |
| 46 | 1 | 0 | 3.951852  | 2.389875  | 0.957110  |
| 47 | 1 | 0 | -0.040975 | -0.657547 | -2.380905 |
| 48 | 1 | 0 | 1.106175  | -2.197265 | -3.930444 |
| 49 | 1 | 0 | 1.888969  | -4.924025 | -0.696469 |
| 50 | 1 | 0 | 1.113551  | -4.374955 | 1.588411  |
| 51 | 1 | 0 | 2.088161  | -4.332344 | -3.092893 |
| 52 | 1 | 0 | -0.147329 | -0.834547 | 4.311430  |
| 53 | 1 | 0 | -1.628149 | 0.159922  | 4.281904  |
| 54 | 1 | 0 | -1.741912 | -1.603013 | 4.028089  |
| 55 | 1 | 0 | 0.015356  | -2.839113 | 3.147564  |
| 56 | 6 | 0 | -3.310818 | -0.247348 | -0.268894 |
| 57 | 6 | 0 | -3.310039 | -1.488134 | -0.928450 |
| 58 | 6 | 0 | -4.408048 | 0.076238  | 0.549414  |
| 59 | 6 | 0 | -4.374698 | -2.374889 | -0.776191 |
| 60 | 1 | 0 | -2.467709 | -1.750673 | -1.560539 |
| 61 | 6 | 0 | -5.478994 | -0.805415 | 0.688289  |
| 62 | 1 | 0 | -4.402601 | 1.014273  | 1.097963  |
| 63 | 6 | 0 | -5.466070 | -2.035424 | 0.026582  |
| 64 | 1 | 0 | -4.354756 | -3.330820 | -1.292952 |
| 65 | 1 | 0 | -6.317584 | -0.537825 | 1.326030  |
| 66 | 1 | 0 | -6.298176 | -2.725244 | 0.139119  |

-----

Compound 1e GS6

Method: b3lyp/6-31g(d) EmpiricalDispersion=GD3 opt freq

SCF Done: E(RB3LYP) = -1497.53593142 A.U. after 1 cycles

Lowest frequency = 18.0245

Zero-point correction= 0.547943  
 (Hartree/Particle)  
 Thermal correction to Energy= 0.579651  
 Thermal correction to Enthalpy= 0.580595  
 Thermal correction to Gibbs Free Energy= 0.484295  
 Sum of electronic and zero-point Energies= -1496.987989  
 Sum of electronic and thermal Energies= -1496.956281  
 Sum of electronic and thermal Enthalpies= -1496.955336  
 Sum of electronic and thermal Free Energies= -1497.051636

Standard orientation:

| Center<br>Number | Atomic<br>Number | Atomic<br>Type | Coordinates (Angstroms) |           |           |
|------------------|------------------|----------------|-------------------------|-----------|-----------|
|                  |                  |                | X                       | Y         | Z         |
| 1                | 6                | 0              | 1.928413                | 0.975815  | -0.067114 |
| 2                | 6                | 0              | -3.638589               | 0.121883  | -0.553260 |
| 3                | 7                | 0              | 1.796711                | 2.344703  | 0.157075  |
| 4                | 6                | 0              | 0.663112                | 0.412652  | 0.040075  |
| 5                | 6                | 0              | -0.251535               | 1.478351  | 0.330883  |
| 6                | 6                | 0              | -1.722017               | 1.342909  | 0.521812  |
| 7                | 8                | 0              | -2.331373               | 1.866969  | 1.455768  |
| 8                | 6                | 0              | 0.477259                | 2.659810  | 0.409045  |
| 9                | 6                | 0              | 2.905078                | 3.283867  | 0.286737  |
| 10               | 6                | 0              | 0.044099                | 4.071792  | 0.726590  |
| 11               | 6                | 0              | -0.180974               | 4.244334  | 2.243349  |
| 12               | 6                | 0              | -1.197670               | 4.508687  | -0.073526 |
| 13               | 6                | 0              | -3.927189               | -0.752932 | -1.615748 |
| 14               | 6                | 0              | -5.212180               | -1.261845 | -1.776866 |
| 15               | 6                | 0              | -6.227861               | -0.912761 | -0.883242 |
| 16               | 6                | 0              | -5.936774               | -0.046134 | 0.171385  |
| 17               | 6                | 0              | -4.655652               | 0.478166  | 0.346529  |
| 18               | 6                | 0              | 0.344539                | -1.036654 | -0.048223 |
| 19               | 6                | 0              | 0.488620                | -1.884127 | 1.099916  |
| 20               | 6                | 0              | -0.127472               | -1.600303 | -1.220364 |
| 21               | 6                | 0              | 0.895708                | -1.375180 | 2.364267  |
| 22               | 6                | 0              | 0.207430                | -3.286085 | 0.988558  |
| 23               | 6                | 0              | -0.414997               | -2.978889 | -1.335367 |
| 24               | 6                | 0              | 1.039232                | -2.209007 | 3.451118  |
| 25               | 6                | 0              | 0.370443                | -4.118024 | 2.128636  |
| 26               | 6                | 0              | -0.238769               | -3.807267 | -0.254326 |
| 27               | 6                | 0              | 0.780571                | -3.595908 | 3.333878  |
| 28               | 7                | 0              | -2.315424               | 0.589305  | -0.461144 |
| 29               | 1                | 0              | -1.705768               | 0.307898  | -1.223527 |
| 30               | 8                | 0              | -0.434035               | -0.790621 | -2.307043 |
| 31               | 6                | 0              | 0.656841                | -0.532709 | -3.199384 |
| 32               | 1                | 0              | 3.841990                | 2.728542  | 0.303729  |
| 33               | 1                | 0              | 2.931634                | 3.991078  | -0.549486 |
| 34               | 1                | 0              | 2.815870                | 3.844153  | 1.221312  |
| 35               | 1                | 0              | 0.859348                | 4.741991  | 0.426669  |
| 36               | 1                | 0              | -0.984315               | 3.578122  | 2.568432  |
| 37               | 1                | 0              | -0.456551               | 5.280263  | 2.475348  |
| 38               | 1                | 0              | 0.725270                | 3.997140  | 2.809967  |
| 39               | 1                | 0              | -2.082550               | 3.949134  | 0.236401  |
| 40               | 1                | 0              | -1.047809               | 4.360422  | -1.148794 |
| 41               | 1                | 0              | -1.393139               | 5.573000  | 0.101559  |
| 42               | 1                | 0              | -3.132909               | -1.032310 | -2.304227 |
| 43               | 1                | 0              | -5.418455               | -1.937486 | -2.603182 |

|    |   |   |           |           |           |
|----|---|---|-----------|-----------|-----------|
| 44 | 1 | 0 | -7.230966 | -1.311046 | -1.008050 |
| 45 | 1 | 0 | -6.717986 | 0.234002  | 0.873663  |
| 46 | 1 | 0 | -4.430669 | 1.151762  | 1.161170  |
| 47 | 1 | 0 | 1.083927  | -0.310920 | 2.459722  |
| 48 | 1 | 0 | 1.346784  | -1.798644 | 4.409133  |
| 49 | 1 | 0 | 0.158298  | -5.180247 | 2.031156  |
| 50 | 1 | 0 | -0.458610 | -4.869028 | -0.332823 |
| 51 | 1 | 0 | 0.898944  | -4.242881 | 4.198698  |
| 52 | 1 | 0 | 0.261830  | 0.110114  | -3.989202 |
| 53 | 1 | 0 | 1.026057  | -1.469349 | -3.636635 |
| 54 | 1 | 0 | 1.477328  | -0.026980 | -2.680689 |
| 55 | 1 | 0 | -0.788715 | -3.349222 | -2.284970 |
| 56 | 6 | 0 | 3.194393  | 0.347360  | -0.483682 |
| 57 | 6 | 0 | 3.664788  | -0.825695 | 0.130420  |
| 58 | 6 | 0 | 3.935003  | 0.881239  | -1.556484 |
| 59 | 6 | 0 | 4.831345  | -1.444206 | -0.317926 |
| 60 | 1 | 0 | 3.117359  | -1.246237 | 0.965747  |
| 61 | 6 | 0 | 5.107952  | 0.268323  | -1.994329 |
| 62 | 1 | 0 | 3.571932  | 1.773751  | -2.059638 |
| 63 | 6 | 0 | 5.559746  | -0.900561 | -1.377886 |
| 64 | 1 | 0 | 5.176177  | -2.351500 | 0.170978  |
| 65 | 1 | 0 | 5.662063  | 0.697510  | -2.825064 |
| 66 | 1 | 0 | 6.470544  | -1.383282 | -1.721544 |

-----  
Compound 1e TS0

Method: b3lyp/6-31g(d) EmpiricalDispersion=GD3 opt(ts,noeigentest,addredun)

SCF Done: E(RB3LYP) = -1497.48756644 A.U. after 1 cycles

Lowest frequency = -20.2924

Zero-point correction= 0.546919  
(Hartree/Particle)  
Thermal correction to Energy= 0.577560  
Thermal correction to Enthalpy= 0.578504  
Thermal correction to Gibbs Free Energy= 0.485998  
Sum of electronic and zero-point Energies= -1496.940648  
Sum of electronic and thermal Energies= -1496.910007  
Sum of electronic and thermal Enthalpies= -1496.909062  
Sum of electronic and thermal Free Energies= -1497.001569

Standard orientation:

| Center<br>Number | Atomic<br>Number | Atomic<br>Type | Coordinates (Angstroms) |           |           |
|------------------|------------------|----------------|-------------------------|-----------|-----------|
|                  |                  |                | X                       | Y         | Z         |
| 1                | 6                | 0              | 0.639930                | 2.532407  | -0.260854 |
| 2                | 6                | 0              | -0.041943               | 1.351620  | -0.519166 |
| 3                | 6                | 0              | 0.890681                | 0.237405  | -0.411856 |
| 4                | 6                | 0              | 2.102693                | 0.821946  | 0.017100  |
| 5                | 7                | 0              | 1.934115                | 2.199300  | 0.068958  |
| 6                | 6                | 0              | 3.320797                | 0.218212  | 0.599100  |
| 7                | 6                | 0              | 3.200269                | -0.608298 | 1.726832  |
| 8                | 6                | 0              | 4.603348                | 0.478417  | 0.091587  |
| 9                | 6                | 0              | 4.327537                | -1.176579 | 2.315436  |
| 10               | 6                | 0              | 5.733180                | -0.082233 | 0.685929  |
| 11               | 6                | 0              | 5.598516                | -0.915463 | 1.797646  |
| 12               | 6                | 0              | -1.536973               | 1.391884  | -0.531251 |
| 13               | 8                | 0              | -2.209439               | 1.989645  | -1.368191 |
| 14               | 6                | 0              | 0.174545                | 3.973794  | -0.299508 |
| 15               | 6                | 0              | -0.995032               | 4.267364  | 0.662262  |

|    |   |   |           |           |           |
|----|---|---|-----------|-----------|-----------|
| 16 | 6 | 0 | -0.153477 | 4.414467  | -1.741441 |
| 17 | 7 | 0 | -2.079414 | 0.784634  | 0.582420  |
| 18 | 6 | 0 | -3.428741 | 0.470771  | 0.837318  |
| 19 | 1 | 0 | -1.408900 | 0.277184  | 1.145004  |
| 20 | 6 | 0 | 2.920052  | 3.157541  | 0.558198  |
| 21 | 6 | 0 | -3.688723 | -0.528975 | 1.787634  |
| 22 | 6 | 0 | -4.997407 | -0.892893 | 2.087951  |
| 23 | 6 | 0 | -6.067793 | -0.268669 | 1.442984  |
| 24 | 6 | 0 | -5.806697 | 0.723713  | 0.497359  |
| 25 | 6 | 0 | -4.499930 | 1.104182  | 0.189172  |
| 26 | 1 | 0 | 2.210933  | -0.813423 | 2.124603  |
| 27 | 1 | 0 | 4.708903  | 1.107377  | -0.788500 |
| 28 | 1 | 0 | 4.215094  | -1.819439 | 3.184489  |
| 29 | 1 | 0 | 6.717884  | 0.125940  | 0.275691  |
| 30 | 1 | 0 | 1.011922  | 4.593622  | 0.037727  |
| 31 | 1 | 0 | -1.916010 | 3.781354  | 0.334139  |
| 32 | 1 | 0 | -1.181657 | 5.347038  | 0.694215  |
| 33 | 1 | 0 | -0.768055 | 3.929419  | 1.679609  |
| 34 | 1 | 0 | -0.982914 | 3.823901  | -2.135857 |
| 35 | 1 | 0 | 0.713349  | 4.275792  | -2.398149 |
| 36 | 1 | 0 | -0.428979 | 5.476099  | -1.758461 |
| 37 | 1 | 0 | 2.492111  | 3.767843  | 1.358038  |
| 38 | 1 | 0 | 3.777058  | 2.620698  | 0.958005  |
| 39 | 1 | 0 | 3.260518  | 3.815447  | -0.248176 |
| 40 | 1 | 0 | -2.858007 | -1.038576 | 2.271157  |
| 41 | 1 | 0 | -5.178903 | -1.673604 | 2.821807  |
| 42 | 1 | 0 | -7.090232 | -0.553831 | 1.674134  |
| 43 | 1 | 0 | -6.630223 | 1.217063  | -0.012550 |
| 44 | 1 | 0 | -4.298860 | 1.865846  | -0.550280 |
| 45 | 6 | 0 | 0.686371  | -1.219198 | -0.636832 |
| 46 | 6 | 0 | -0.621309 | -1.857529 | -0.759372 |
| 47 | 6 | 0 | 1.753116  | -2.136789 | -0.673935 |
| 48 | 6 | 0 | -1.720488 | -1.257288 | -1.424438 |
| 49 | 6 | 0 | -0.799084 | -3.215497 | -0.325519 |
| 50 | 6 | 0 | -2.958257 | -1.864657 | -1.485967 |
| 51 | 1 | 0 | -1.577010 | -0.323845 | -1.950165 |
| 52 | 6 | 0 | -2.094498 | -3.795943 | -0.345951 |
| 53 | 6 | 0 | 0.344679  | -3.991587 | 0.004033  |
| 54 | 6 | 0 | -3.167394 | -3.125867 | -0.890309 |
| 55 | 1 | 0 | -3.771598 | -1.363208 | -2.001589 |
| 56 | 1 | 0 | -2.210040 | -4.809064 | 0.033074  |
| 57 | 1 | 0 | 0.219435  | -5.012104 | 0.356531  |
| 58 | 1 | 0 | -4.152534 | -3.583050 | -0.910184 |
| 59 | 1 | 0 | 6.477836  | -1.356743 | 2.258979  |
| 60 | 8 | 0 | 3.036789  | -1.834012 | -1.054690 |
| 61 | 6 | 0 | 3.174228  | -1.170589 | -2.310172 |
| 62 | 1 | 0 | 4.236594  | -1.221341 | -2.558072 |
| 63 | 1 | 0 | 2.585434  | -1.679895 | -3.082909 |
| 64 | 1 | 0 | 2.862962  | -0.121049 | -2.256061 |
| 65 | 6 | 0 | 1.586938  | -3.485795 | -0.273354 |
| 66 | 1 | 0 | 2.487379  | -4.087299 | -0.196532 |

Compound 1e TS180

Method: b3lyp/6-31g(d) EmpiricalDispersion=GD3 opt(ts,noeigentest,addredun)

SCF Done: E(RB3LYP) = -1497.48995038 A.U. after 1 cycles

Lowest frequency = -16.0057

Zero-point correction= 0.546900  
 (Hartree/Particle)  
 Thermal correction to Energy= 0.577558  
 Thermal correction to Enthalpy= 0.578502  
 Thermal correction to Gibbs Free Energy= 0.485864  
 Sum of electronic and zero-point Energies= -1496.943051  
 Sum of electronic and thermal Energies= -1496.912392  
 Sum of electronic and thermal Enthalpies= -1496.911448  
 Sum of electronic and thermal Free Energies= -1497.004087

Standard orientation:

| Center<br>Number | Atomic<br>Number | Atomic<br>Type | Coordinates (Angstroms) |           |           |
|------------------|------------------|----------------|-------------------------|-----------|-----------|
|                  |                  |                | X                       | Y         | Z         |
| 1                | 6                | 0              | 0.199399                | 2.686906  | 0.153272  |
| 2                | 6                | 0              | 0.627354                | 1.397657  | 0.422010  |
| 3                | 6                | 0              | -0.526523               | 0.505091  | 0.420074  |
| 4                | 6                | 0              | -1.613887               | 1.319567  | 0.037566  |
| 5                | 7                | 0              | -1.156125               | 2.628512  | -0.082154 |
| 6                | 6                | 0              | -2.972536               | 1.013824  | -0.469259 |
| 7                | 6                | 0              | -3.110878               | 0.243215  | -1.632814 |
| 8                | 6                | 0              | -4.131926               | 1.510578  | 0.149733  |
| 9                | 6                | 0              | -4.372442               | -0.044822 | -2.150881 |
| 10               | 6                | 0              | -5.394326               | 1.225631  | -0.369115 |
| 11               | 6                | 0              | -5.518034               | 0.443602  | -1.520378 |
| 12               | 6                | 0              | 2.084942                | 1.068558  | 0.337945  |
| 13               | 8                | 0              | 2.953489                | 1.595375  | 1.027542  |
| 14               | 6                | 0              | 0.962873                | 3.993616  | 0.087727  |
| 15               | 6                | 0              | 2.075433                | 3.993786  | -0.980342 |
| 16               | 6                | 0              | 1.506903                | 4.390159  | 1.475809  |
| 17               | 7                | 0              | 2.363627                | 0.227651  | -0.726625 |
| 18               | 6                | 0              | 3.534136                | -0.530069 | -0.926691 |
| 19               | 1                | 0              | 1.539210                | -0.151505 | -1.174520 |
| 20               | 6                | 0              | -1.946476               | 3.768110  | -0.536855 |
| 21               | 6                | 0              | 3.423638                | -1.706644 | -1.685566 |
| 22               | 6                | 0              | 4.544304                | -2.494576 | -1.934014 |
| 23               | 6                | 0              | 5.791349                | -2.126129 | -1.424874 |
| 24               | 6                | 0              | 5.897738                | -0.958220 | -0.667549 |
| 25               | 6                | 0              | 4.786321                | -0.153553 | -0.417258 |
| 26               | 1                | 0              | -2.218713               | -0.148328 | -2.111851 |
| 27               | 1                | 0              | -4.036372               | 2.100885  | 1.057658  |
| 28               | 1                | 0              | -4.460532               | -0.655212 | -3.045352 |
| 29               | 1                | 0              | -6.281221               | 1.609257  | 0.128172  |
| 30               | 1                | 0              | 0.251679                | 4.771981  | -0.208001 |
| 31               | 1                | 0              | 2.885572                | 3.313395  | -0.711652 |
| 32               | 1                | 0              | 2.498420                | 5.001111  | -1.070330 |
| 33               | 1                | 0              | 1.684118                | 3.698883  | -1.960628 |
| 34               | 1                | 0              | 2.223045                | 3.643070  | 1.823571  |
| 35               | 1                | 0              | 0.693593                | 4.460910  | 2.207811  |
| 36               | 1                | 0              | 2.003662                | 5.366630  | 1.421596  |
| 37               | 1                | 0              | -1.478066               | 4.232747  | -1.409071 |
| 38               | 1                | 0              | -2.940254               | 3.431323  | -0.821125 |
| 39               | 1                | 0              | -2.042410               | 4.516485  | 0.256444  |
| 40               | 1                | 0              | 2.450437                | -2.009873 | -2.066316 |
| 41               | 1                | 0              | 4.438343                | -3.402549 | -2.522142 |
| 42               | 1                | 0              | 6.666482                | -2.740995 | -1.615498 |
| 43               | 1                | 0              | 6.862381                | -0.660038 | -0.264564 |
| 44               | 1                | 0              | 4.868452                | 0.747425  | 0.173644  |

|    |   |   |           |           |           |
|----|---|---|-----------|-----------|-----------|
| 45 | 6 | 0 | -0.483097 | -0.954419 | 0.713283  |
| 46 | 6 | 0 | -1.614356 | -1.868410 | 0.603478  |
| 47 | 6 | 0 | 0.708099  | -1.596960 | 1.094705  |
| 48 | 6 | 0 | -2.945678 | -1.493699 | 0.912269  |
| 49 | 6 | 0 | -1.390711 | -3.259506 | 0.321024  |
| 50 | 6 | 0 | -4.005420 | -2.365318 | 0.771558  |
| 51 | 1 | 0 | -3.125565 | -0.513112 | 1.323307  |
| 52 | 6 | 0 | -2.500271 | -4.121587 | 0.117310  |
| 53 | 6 | 0 | -0.067750 | -3.774552 | 0.368088  |
| 54 | 6 | 0 | -3.790846 | -3.681880 | 0.312165  |
| 55 | 1 | 0 | -5.006858 | -2.032944 | 1.029973  |
| 56 | 1 | 0 | -2.304048 | -5.159513 | -0.142271 |
| 57 | 1 | 0 | 0.113229  | -4.819034 | 0.128312  |
| 58 | 1 | 0 | -4.630197 | -4.357902 | 0.173393  |
| 59 | 1 | 0 | -6.501751 | 0.216621  | -1.922079 |
| 60 | 8 | 0 | 1.769856  | -0.943434 | 1.675254  |
| 61 | 6 | 0 | 1.517955  | -0.388844 | 2.971576  |
| 62 | 1 | 0 | 1.305206  | -1.188581 | 3.692212  |
| 63 | 1 | 0 | 2.431251  | 0.141311  | 3.242238  |
| 64 | 1 | 0 | 0.684571  | 0.321771  | 2.948178  |
| 65 | 6 | 0 | 0.933494  | -2.973879 | 0.851555  |
| 66 | 1 | 0 | 1.934371  | -3.346278 | 1.044673  |

Compound 1f GS1

Method: b3lyp/6-31g(d) EmpiricalDispersion=GD3 opt freq

SCF Done: E(RB3LYP) = -1612.06309351 A.U. after 1 cycles

Lowest frequency = 15.0590

Zero-point correction= 0.580898  
(Hartree/Particle)  
Thermal correction to Energy= 0.615251  
Thermal correction to Enthalpy= 0.616195  
Thermal correction to Gibbs Free Energy= 0.513972  
Sum of electronic and zero-point Energies= -1611.482195  
Sum of electronic and thermal Energies= -1611.447842  
Sum of electronic and thermal Enthalpies= -1611.446898  
Sum of electronic and thermal Free Energies= -1611.549122

Standard orientation:

| Center<br>Number | Atomic<br>Number | Atomic<br>Type | Coordinates (Angstroms) |           |           |
|------------------|------------------|----------------|-------------------------|-----------|-----------|
|                  |                  |                | X                       | Y         | Z         |
| 1                | 6                | 0              | 3.299300                | -0.339182 | -0.414474 |
| 2                | 6                | 0              | 5.180100                | -2.348573 | -1.026104 |
| 3                | 6                | 0              | 2.275445                | 0.681739  | -0.136514 |
| 4                | 6                | 0              | -3.298232               | 1.116720  | -0.457722 |
| 5                | 7                | 0              | 2.521804                | 2.052948  | -0.189435 |
| 6                | 6                | 0              | 0.916001                | 0.512321  | 0.076933  |
| 7                | 6                | 0              | 0.328225                | 1.818715  | 0.141465  |
| 8                | 6                | 0              | -1.121649               | 2.102100  | 0.330784  |
| 9                | 8                | 0              | -1.555431               | 2.919630  | 1.143453  |
| 10               | 6                | 0              | 1.345927                | 2.752906  | -0.011124 |
| 11               | 6                | 0              | 3.843829                | 2.665896  | -0.241998 |
| 12               | 6                | 0              | 1.310931                | 4.262205  | 0.024634  |
| 13               | 6                | 0              | 1.189907                | 4.767133  | 1.477798  |
| 14               | 6                | 0              | 0.195958                | 4.849754  | -0.861156 |
| 15               | 6                | 0              | 3.450024                | -1.460605 | 0.419167  |

|    |   |   |           |           |           |
|----|---|---|-----------|-----------|-----------|
| 16 | 6 | 0 | 4.376492  | -2.455892 | 0.110890  |
| 17 | 6 | 0 | 5.044560  | -1.237545 | -1.861443 |
| 18 | 6 | 0 | 4.109559  | -0.247372 | -1.562849 |
| 19 | 6 | 0 | -3.791730 | 0.059839  | -1.244412 |
| 20 | 6 | 0 | -5.151688 | -0.235827 | -1.242643 |
| 21 | 6 | 0 | -6.037652 | 0.506800  | -0.457720 |
| 22 | 6 | 0 | -5.541718 | 1.551537  | 0.323889  |
| 23 | 6 | 0 | -4.182878 | 1.868651  | 0.330540  |
| 24 | 6 | 0 | 0.208993  | -0.781291 | 0.261721  |
| 25 | 6 | 0 | 0.114642  | -1.389881 | 1.557433  |
| 26 | 6 | 0 | -0.413860 | -1.384754 | -0.808555 |
| 27 | 6 | 0 | 0.690555  | -0.799756 | 2.713119  |
| 28 | 6 | 0 | -0.587100 | -2.630135 | 1.693417  |
| 29 | 6 | 0 | -1.138172 | -2.607805 | -0.670999 |
| 30 | 6 | 0 | 0.599268  | -1.414887 | 3.943501  |
| 31 | 6 | 0 | -0.660368 | -3.238801 | 2.974068  |
| 32 | 6 | 0 | -1.206688 | -3.222215 | 0.558783  |
| 33 | 6 | 0 | -0.078745 | -2.648763 | 4.074720  |
| 34 | 7 | 0 | -1.912127 | 1.349533  | -0.506018 |
| 35 | 1 | 0 | -1.411565 | 0.809708  | -1.204755 |
| 36 | 8 | 0 | -1.727191 | -3.049183 | -1.819009 |
| 37 | 8 | 0 | -0.460449 | -0.731319 | -2.023731 |
| 38 | 6 | 0 | -2.573930 | -4.186559 | -1.729941 |
| 39 | 6 | 0 | 0.475854  | -1.199903 | -3.003041 |
| 40 | 1 | 0 | 5.904294  | -3.124009 | -1.260572 |
| 41 | 1 | 0 | 4.600109  | 1.891341  | -0.120408 |
| 42 | 1 | 0 | 4.012442  | 3.173774  | -1.197944 |
| 43 | 1 | 0 | 3.955672  | 3.391373  | 0.568474  |
| 44 | 1 | 0 | 2.261652  | 4.626709  | -0.384071 |
| 45 | 1 | 0 | 0.252094  | 4.407082  | 1.909426  |
| 46 | 1 | 0 | 1.201131  | 5.863515  | 1.506145  |
| 47 | 1 | 0 | 2.018911  | 4.400866  | 2.095782  |
| 48 | 1 | 0 | -0.791165 | 4.603827  | -0.463897 |
| 49 | 1 | 0 | 0.264775  | 4.471692  | -1.887237 |
| 50 | 1 | 0 | 0.284686  | 5.941952  | -0.891176 |
| 51 | 1 | 0 | 2.841627  | -1.545274 | 1.312421  |
| 52 | 1 | 0 | 4.475715  | -3.315310 | 0.768726  |
| 53 | 1 | 0 | 5.658317  | -1.146805 | -2.753918 |
| 54 | 1 | 0 | 3.985478  | 0.598765  | -2.233654 |
| 55 | 1 | 0 | -3.101473 | -0.532618 | -1.840603 |
| 56 | 1 | 0 | -5.518876 | -1.055479 | -1.855597 |
| 57 | 1 | 0 | -7.098943 | 0.273847  | -0.455840 |
| 58 | 1 | 0 | -6.220295 | 2.137517  | 0.938831  |
| 59 | 1 | 0 | -3.796691 | 2.678081  | 0.934240  |
| 60 | 1 | 0 | 1.200274  | 0.152742  | 2.609827  |
| 61 | 1 | 0 | 1.043350  | -0.946965 | 4.817708  |
| 62 | 1 | 0 | -1.191679 | -4.182711 | 3.072924  |
| 63 | 1 | 0 | -1.749736 | -4.151242 | 0.691891  |
| 64 | 1 | 0 | -0.146506 | -3.127312 | 5.048021  |
| 65 | 1 | 0 | -2.979000 | -4.336665 | -2.732237 |
| 66 | 1 | 0 | -3.395760 | -4.013208 | -1.022903 |
| 67 | 1 | 0 | -2.015758 | -5.082035 | -1.424994 |
| 68 | 1 | 0 | 0.322980  | -0.581716 | -3.890366 |
| 69 | 1 | 0 | 0.281057  | -2.249897 | -3.246587 |
| 70 | 1 | 0 | 1.502763  | -1.081349 | -2.638193 |

-----

Compound 1f GS2

Method: b3lyp/6-31g(d) EmpiricalDispersion=GD3 opt freq

SCF Done: E(RB3LYP) = -1612.06070165 A.U. after 1 cycles  
 Lowest frequency = 16.2691

Zero-point correction= 0.580704  
 (Hartree/Particle)  
 Thermal correction to Energy= 0.615190  
 Thermal correction to Enthalpy= 0.616134  
 Thermal correction to Gibbs Free Energy= 0.513391  
 Sum of electronic and zero-point Energies= -1611.479998  
 Sum of electronic and thermal Energies= -1611.445512  
 Sum of electronic and thermal Enthalpies= -1611.444567  
 Sum of electronic and thermal Free Energies= -1611.547311

Standard orientation:

| Center<br>Number | Atomic<br>Number | Atomic<br>Type | Coordinates (Angstroms) |           |           |
|------------------|------------------|----------------|-------------------------|-----------|-----------|
|                  |                  |                | X                       | Y         | Z         |
| 1                | 6                | 0              | 3.183231                | -0.653128 | -0.411098 |
| 2                | 6                | 0              | 4.883165                | -2.805614 | -1.063221 |
| 3                | 6                | 0              | 2.252105                | 0.449161  | -0.114348 |
| 4                | 6                | 0              | -3.265778               | 1.485252  | -0.422544 |
| 5                | 7                | 0              | 2.630860                | 1.792517  | -0.125255 |
| 6                | 6                | 0              | 0.881391                | 0.398546  | 0.087915  |
| 7                | 6                | 0              | 0.421986                | 1.752282  | 0.180264  |
| 8                | 6                | 0              | -0.982145               | 2.211478  | 0.349312  |
| 9                | 8                | 0              | -1.302664               | 3.120899  | 1.115969  |
| 10               | 6                | 0              | 1.522131                | 2.592773  | 0.063692  |
| 11               | 6                | 0              | 4.013868                | 2.250478  | -0.187102 |
| 12               | 6                | 0              | 1.518394                | 4.099926  | 0.153302  |
| 13               | 6                | 0              | 2.275061                | 4.820753  | -0.978581 |
| 14               | 6                | 0              | 1.945268                | 4.591263  | 1.551569  |
| 15               | 6                | 0              | 3.238835                | -1.797310 | 0.402925  |
| 16               | 6                | 0              | 4.075993                | -2.863048 | 0.074675  |
| 17               | 6                | 0              | 4.842289                | -1.672479 | -1.878785 |
| 18               | 6                | 0              | 3.996984                | -0.610937 | -1.559654 |
| 19               | 6                | 0              | -3.890805               | 0.495132  | -1.202788 |
| 20               | 6                | 0              | -5.278269               | 0.387894  | -1.214926 |
| 21               | 6                | 0              | -6.062986               | 1.254686  | -0.449754 |
| 22               | 6                | 0              | -5.437322               | 2.231995  | 0.326087  |
| 23               | 6                | 0              | -4.048124               | 2.360902  | 0.346273  |
| 24               | 6                | 0              | 0.062460                | -0.830203 | 0.253763  |
| 25               | 6                | 0              | -0.067535               | -1.459358 | 1.536905  |
| 26               | 6                | 0              | -0.623823               | -1.353263 | -0.819882 |
| 27               | 6                | 0              | 0.565724                | -0.944885 | 2.698753  |
| 28               | 6                | 0              | -0.866302               | -2.641494 | 1.653757  |
| 29               | 6                | 0              | -1.441874               | -2.517857 | -0.701524 |
| 30               | 6                | 0              | 0.437691                | -1.579260 | 3.916066  |
| 31               | 6                | 0              | -0.974779               | -3.272520 | 2.921071  |
| 32               | 6                | 0              | -1.544136               | -3.155201 | 0.514174  |
| 33               | 6                | 0              | -0.335989               | -2.757509 | 4.027640  |
| 34               | 7                | 0              | -1.861462               | 1.524210  | -0.455835 |
| 35               | 1                | 0              | -1.432429               | 0.914123  | -1.144010 |
| 36               | 8                | 0              | -2.075298               | -2.883634 | -1.852217 |
| 37               | 8                | 0              | -0.632883               | -0.669439 | -2.019047 |
| 38               | 6                | 0              | -2.984848               | -3.972976 | -1.786279 |
| 39               | 6                | 0              | 0.263421                | -1.178261 | -3.015449 |
| 40               | 1                | 0              | 5.537467                | -3.636267 | -1.313558 |
| 41               | 1                | 0              | 4.673764                | 1.429344  | 0.093805  |



|    |   |   |           |           |           |
|----|---|---|-----------|-----------|-----------|
| 42 | 1 | 0 | 4.283563  | 2.588142  | -1.193135 |
| 43 | 1 | 0 | 4.163998  | 3.072884  | 0.512865  |
| 44 | 1 | 0 | 0.463521  | 4.372424  | 0.056271  |
| 45 | 1 | 0 | 3.362411  | 4.753729  | -0.874856 |
| 46 | 1 | 0 | 2.017351  | 5.885887  | -0.969319 |
| 47 | 1 | 0 | 2.000967  | 4.415898  | -1.959306 |
| 48 | 1 | 0 | 2.983647  | 4.329447  | 1.788272  |
| 49 | 1 | 0 | 1.293909  | 4.149148  | 2.310891  |
| 50 | 1 | 0 | 1.856252  | 5.682473  | 1.612663  |
| 51 | 1 | 0 | 2.627727  | -1.845019 | 1.296903  |
| 52 | 1 | 0 | 4.102497  | -3.738892 | 0.717628  |
| 53 | 1 | 0 | 5.460291  | -1.619062 | -2.771342 |
| 54 | 1 | 0 | 3.947098  | 0.255181  | -2.214101 |
| 55 | 1 | 0 | -3.280780 | -0.192530 | -1.784705 |
| 56 | 1 | 0 | -5.747440 | -0.381854 | -1.822929 |
| 57 | 1 | 0 | -7.146108 | 1.168868  | -0.458686 |
| 58 | 1 | 0 | -6.036181 | 2.913164  | 0.925625  |
| 59 | 1 | 0 | -3.561195 | 3.119554  | 0.943211  |
| 60 | 1 | 0 | 1.150144  | -0.034685 | 2.610957  |
| 61 | 1 | 0 | 0.927000  | -1.169086 | 4.795130  |
| 62 | 1 | 0 | -1.579514 | -4.172682 | 3.004971  |
| 63 | 1 | 0 | -2.156791 | -4.041882 | 0.633007  |
| 64 | 1 | 0 | -0.431885 | -3.251984 | 4.990554  |
| 65 | 1 | 0 | -2.475643 | -4.906825 | -1.512161 |
| 66 | 1 | 0 | -3.406804 | -4.070972 | -2.788033 |
| 67 | 1 | 0 | -3.789645 | -3.774667 | -1.066279 |
| 68 | 1 | 0 | -0.007191 | -2.205254 | -3.283728 |
| 69 | 1 | 0 | 1.297738  | -1.143110 | -2.653735 |
| 70 | 1 | 0 | 0.151537  | -0.528511 | -3.886149 |

Compound 1f GS3

Method: b3lyp/6-31g(d) EmpiricalDispersion=GD3 opt freq

SCF Done: E(RB3LYP) = -1612.06250739 A.U. after 1 cycles

Lowest frequency = 13.8992

Zero-point correction= 0.580513  
(Hartree/Particle)  
Thermal correction to Energy= 0.614967  
Thermal correction to Enthalpy= 0.615911  
Thermal correction to Gibbs Free Energy= 0.513184  
Sum of electronic and zero-point Energies= -1611.481994  
Sum of electronic and thermal Energies= -1611.447541  
Sum of electronic and thermal Enthalpies= -1611.446596  
Sum of electronic and thermal Free Energies= -1611.549324

Standard orientation:

| Center<br>Number | Atomic<br>Number | Atomic<br>Type | Coordinates (Angstroms) |           |           |
|------------------|------------------|----------------|-------------------------|-----------|-----------|
|                  |                  |                | X                       | Y         | Z         |
| 1                | 6                | 0              | 3.410271                | -0.570202 | -0.133362 |
| 2                | 6                | 0              | 5.240034                | -2.704468 | -0.178801 |
| 3                | 6                | 0              | 2.414138                | 0.513160  | -0.114281 |
| 4                | 6                | 0              | -3.179290               | 1.171315  | -0.497718 |
| 5                | 7                | 0              | 2.727816                | 1.869212  | -0.170708 |
| 6                | 6                | 0              | 1.039219                | 0.406829  | -0.031490 |
| 7                | 6                | 0              | 0.505073                | 1.740707  | -0.034558 |
| 8                | 6                | 0              | -0.925966               | 2.094483  | 0.142173  |

|    |   |   |           |           |           |
|----|---|---|-----------|-----------|-----------|
| 9  | 8 | 0 | -1.310161 | 2.976705  | 0.915200  |
| 10 | 6 | 0 | 1.576332  | 2.626071  | -0.112957 |
| 11 | 6 | 0 | 4.078431  | 2.416747  | -0.154301 |
| 12 | 6 | 0 | 1.619812  | 4.135657  | -0.117352 |
| 13 | 6 | 0 | 1.487707  | 4.688195  | 1.317588  |
| 14 | 6 | 0 | 0.568478  | 4.760717  | -1.052696 |
| 15 | 6 | 0 | 4.362752  | -0.676774 | -1.161577 |
| 16 | 6 | 0 | 5.274585  | -1.731525 | -1.180241 |
| 17 | 6 | 0 | 4.293087  | -2.611423 | 0.843840  |
| 18 | 6 | 0 | 3.388606  | -1.550734 | 0.873410  |
| 19 | 6 | 0 | -3.759866 | 0.112499  | -1.218163 |
| 20 | 6 | 0 | -5.132384 | -0.107297 | -1.156395 |
| 21 | 6 | 0 | -5.946683 | 0.717957  | -0.376643 |
| 22 | 6 | 0 | -5.365949 | 1.767536  | 0.336726  |
| 23 | 6 | 0 | -3.992298 | 2.007427  | 0.283191  |
| 24 | 6 | 0 | 0.246491  | -0.842450 | 0.078293  |
| 25 | 6 | 0 | -0.251149 | -1.504739 | -1.093250 |
| 26 | 6 | 0 | -0.104200 | -1.310322 | 1.327529  |
| 27 | 6 | 0 | 0.071525  | -1.061329 | -2.403508 |
| 28 | 6 | 0 | -1.147296 | -2.609816 | -0.940993 |
| 29 | 6 | 0 | -0.977252 | -2.438621 | 1.476529  |
| 30 | 6 | 0 | -0.480392 | -1.666173 | -3.514556 |
| 31 | 6 | 0 | -1.690529 | -3.215480 | -2.103688 |
| 32 | 6 | 0 | -1.492165 | -3.061510 | 0.361856  |
| 33 | 6 | 0 | -1.372195 | -2.752137 | -3.363186 |
| 34 | 7 | 0 | -1.783920 | 1.321818  | -0.605792 |
| 35 | 1 | 0 | -1.342521 | 0.669069  | -1.239747 |
| 36 | 8 | 0 | -1.231396 | -2.791389 | 2.766388  |
| 37 | 8 | 0 | 0.435179  | -0.735939 | 2.448608  |
| 38 | 6 | 0 | -2.119728 | -3.875256 | 2.995446  |
| 39 | 6 | 0 | -0.441704 | 0.127514  | 3.190202  |
| 40 | 1 | 0 | 5.946313  | -3.530258 | -0.196469 |
| 41 | 1 | 0 | 4.337248  | 2.871712  | -1.116832 |
| 42 | 1 | 0 | 4.170873  | 3.171676  | 0.631017  |
| 43 | 1 | 0 | 4.783393  | 1.612355  | 0.052626  |
| 44 | 1 | 0 | 2.601373  | 4.435114  | -0.506138 |
| 45 | 1 | 0 | 0.518663  | 4.395992  | 1.730210  |
| 46 | 1 | 0 | 1.562771  | 5.782439  | 1.316393  |
| 47 | 1 | 0 | 2.275292  | 4.292289  | 1.970239  |
| 48 | 1 | 0 | -0.443040 | 4.582353  | -0.681914 |
| 49 | 1 | 0 | 0.647742  | 4.351532  | -2.066063 |
| 50 | 1 | 0 | 0.721011  | 5.844831  | -1.108191 |
| 51 | 1 | 0 | 4.371111  | 0.062281  | -1.958801 |
| 52 | 1 | 0 | 6.003020  | -1.800837 | -1.983962 |
| 53 | 1 | 0 | 4.263723  | -3.363073 | 1.628357  |
| 54 | 1 | 0 | 2.666889  | -1.461037 | 1.679065  |
| 55 | 1 | 0 | -3.129892 | -0.543051 | -1.815418 |
| 56 | 1 | 0 | -5.564584 | -0.931276 | -1.718407 |
| 57 | 1 | 0 | -7.018323 | 0.545784  | -0.328179 |
| 58 | 1 | 0 | -5.988232 | 2.419207  | 0.944966  |
| 59 | 1 | 0 | -3.542162 | 2.822360  | 0.832001  |
| 60 | 1 | 0 | 0.765090  | -0.232998 | -2.513332 |
| 61 | 1 | 0 | -0.225387 | -1.310455 | -4.508939 |
| 62 | 1 | 0 | -2.374377 | -4.052767 | -1.983954 |
| 63 | 1 | 0 | -2.170061 | -3.902654 | 0.453209  |
| 64 | 1 | 0 | -1.804183 | -3.223696 | -4.241657 |
| 65 | 1 | 0 | -2.187150 | -3.981909 | 4.079499  |
| 66 | 1 | 0 | -1.734871 | -4.807359 | 2.560209  |
| 67 | 1 | 0 | -3.117495 | -3.669932 | 2.584723  |

|    |   |   |           |           |          |
|----|---|---|-----------|-----------|----------|
| 68 | 1 | 0 | -0.702779 | 1.016332  | 2.605178 |
| 69 | 1 | 0 | 0.118721  | 0.428808  | 4.077869 |
| 70 | 1 | 0 | -1.349386 | -0.404407 | 3.493980 |

Compound 1f GS4

Method: b3lyp/6-31g(d) EmpiricalDispersion=GD3 opt freq

SCF Done: E(RB3LYP) = -1612.06181316 A.U. after 1 cycles

Lowest frequency = 16.6830

|                                              |              |
|----------------------------------------------|--------------|
| Zero-point correction=                       | 0.580828     |
| (Hartree/Particle)                           |              |
| Thermal correction to Energy=                | 0.615168     |
| Thermal correction to Enthalpy=              | 0.616112     |
| Thermal correction to Gibbs Free Energy=     | 0.513836     |
| Sum of electronic and zero-point Energies=   | -1611.480985 |
| Sum of electronic and thermal Energies=      | -1611.446645 |
| Sum of electronic and thermal Enthalpies=    | -1611.445701 |
| Sum of electronic and thermal Free Energies= | -1611.547977 |

Standard orientation:

| Center<br>Number | Atomic<br>Number | Atomic<br>Type | Coordinates (Angstroms) |           |           |
|------------------|------------------|----------------|-------------------------|-----------|-----------|
|                  |                  |                | X                       | Y         | Z         |
| 1                | 6                | 0              | 3.254445                | 0.154417  | -0.561367 |
| 2                | 6                | 0              | 5.500887                | -1.550592 | -0.600421 |
| 3                | 6                | 0              | 2.057199                | 1.006521  | -0.488089 |
| 4                | 6                | 0              | -3.603490               | 0.722940  | 0.069420  |
| 5                | 7                | 0              | 2.096151                | 2.398489  | -0.515349 |
| 6                | 6                | 0              | 0.747998                | 0.629456  | -0.219023 |
| 7                | 6                | 0              | -0.016001               | 1.835168  | -0.049511 |
| 8                | 6                | 0              | -1.430237               | 1.933649  | 0.412164  |
| 9                | 8                | 0              | -1.786113               | 2.712529  | 1.299331  |
| 10               | 6                | 0              | 0.843260                | 2.912008  | -0.245731 |
| 11               | 6                | 0              | 3.227654                | 3.194702  | -0.977060 |
| 12               | 6                | 0              | 0.601128                | 4.401870  | -0.180233 |
| 13               | 6                | 0              | 0.646677                | 4.890411  | 1.283786  |
| 14               | 6                | 0              | -0.701685               | 4.836982  | -0.874943 |
| 15               | 6                | 0              | 4.404093                | 0.453454  | 0.193941  |
| 16               | 6                | 0              | 5.517694                | -0.384189 | 0.166787  |
| 17               | 6                | 0              | 4.359975                | -1.869811 | -1.339615 |
| 18               | 6                | 0              | 3.252283                | -1.024890 | -1.325361 |
| 19               | 6                | 0              | -4.133810               | -0.395329 | -0.600124 |
| 20               | 6                | 0              | -5.439606               | -0.806048 | -0.349401 |
| 21               | 6                | 0              | -6.234323               | -0.119175 | 0.572082  |
| 22               | 6                | 0              | -5.701720               | 0.985807  | 1.237931  |
| 23               | 6                | 0              | -4.397208               | 1.417782  | 0.995477  |
| 24               | 6                | 0              | 0.315436                | -0.772560 | 0.015614  |
| 25               | 6                | 0              | 0.732425                | -1.486444 | 1.190894  |
| 26               | 6                | 0              | -0.477573               | -1.419354 | -0.909513 |
| 27               | 6                | 0              | 1.519715                | -0.882654 | 2.205437  |
| 28               | 6                | 0              | 0.337447                | -2.853241 | 1.351177  |
| 29               | 6                | 0              | -0.901098               | -2.771325 | -0.734260 |
| 30               | 6                | 0              | 1.917983                | -1.596731 | 3.314300  |
| 31               | 6                | 0              | 0.767706                | -3.562795 | 2.503301  |
| 32               | 6                | 0              | -0.483419               | -3.475904 | 0.371312  |
| 33               | 6                | 0              | 1.543883                | -2.951883 | 3.462858  |
| 34               | 7                | 0              | -2.277355               | 1.075001  | -0.239800 |

|    |   |   |           |           |           |
|----|---|---|-----------|-----------|-----------|
| 35 | 1 | 0 | -1.871539 | 0.575119  | -1.025484 |
| 36 | 8 | 0 | -1.711246 | -3.244060 | -1.725561 |
| 37 | 8 | 0 | -0.978660 | -0.725788 | -1.997847 |
| 38 | 6 | 0 | -2.239542 | -4.554265 | -1.575646 |
| 39 | 6 | 0 | -0.312297 | -0.944811 | -3.243896 |
| 40 | 1 | 0 | 6.365572  | -2.208310 | -0.615787 |
| 41 | 1 | 0 | 4.038055  | 2.528549  | -1.268373 |
| 42 | 1 | 0 | 2.943590  | 3.795044  | -1.846692 |
| 43 | 1 | 0 | 3.586187  | 3.863562  | -0.187969 |
| 44 | 1 | 0 | 1.421304  | 4.893974  | -0.717406 |
| 45 | 1 | 0 | -0.154725 | 4.411517  | 1.851424  |
| 46 | 1 | 0 | 0.519634  | 5.979055  | 1.327436  |
| 47 | 1 | 0 | 1.605297  | 4.639113  | 1.753795  |
| 48 | 1 | 0 | -1.576869 | 4.470857  | -0.334793 |
| 49 | 1 | 0 | -0.744384 | 4.464760  | -1.904727 |
| 50 | 1 | 0 | -0.756201 | 5.931432  | -0.903991 |
| 51 | 1 | 0 | 4.409133  | 1.335521  | 0.828474  |
| 52 | 1 | 0 | 6.392885  | -0.134080 | 0.760686  |
| 53 | 1 | 0 | 4.333348  | -2.778798 | -1.934793 |
| 54 | 1 | 0 | 2.368737  | -1.282348 | -1.898343 |
| 55 | 1 | 0 | -3.510064 | -0.944000 | -1.302113 |
| 56 | 1 | 0 | -5.835301 | -1.672279 | -0.874160 |
| 57 | 1 | 0 | -7.253085 | -0.441988 | 0.768447  |
| 58 | 1 | 0 | -6.308867 | 1.529010  | 1.957912  |
| 59 | 1 | 0 | -3.983530 | 2.273821  | 1.509669  |
| 60 | 1 | 0 | 1.800948  | 0.158556  | 2.096085  |
| 61 | 1 | 0 | 2.519344  | -1.115489 | 4.080563  |
| 62 | 1 | 0 | 0.467655  | -4.601999 | 2.617618  |
| 63 | 1 | 0 | -0.784048 | -4.505996 | 0.526941  |
| 64 | 1 | 0 | 1.864009  | -3.508542 | 4.339616  |
| 65 | 1 | 0 | -2.882525 | -4.718223 | -2.442193 |
| 66 | 1 | 0 | -2.833393 | -4.640161 | -0.656310 |
| 67 | 1 | 0 | -1.443189 | -5.310766 | -1.563765 |
| 68 | 1 | 0 | -0.898895 | -0.419484 | -4.000654 |
| 69 | 1 | 0 | -0.279672 | -2.013206 | -3.481697 |
| 70 | 1 | 0 | 0.701894  | -0.529104 | -3.214497 |

-----

Compound 1f TS0

Method: b3lyp/6-31g(d) EmpiricalDispersion=GD3 opt(ts,noeigentest,addredun)

SCF Done: E(RB3LYP) = -1612.00914999 A.U. after 1 cycles

Lowest frequency = -21.5260

Zero-point correction= 0.579428  
(Hartree/Particle)  
Thermal correction to Energy= 0.612898  
Thermal correction to Enthalpy= 0.613842  
Thermal correction to Gibbs Free Energy= 0.514571  
Sum of electronic and zero-point Energies= -1611.429722  
Sum of electronic and thermal Energies= -1611.396252  
Sum of electronic and thermal Enthalpies= -1611.395308  
Sum of electronic and thermal Free Energies= -1611.494579

Standard orientation:

-----

| Center<br>Number | Atomic<br>Number | Atomic<br>Type | Coordinates (Angstroms) |           |           |
|------------------|------------------|----------------|-------------------------|-----------|-----------|
|                  |                  |                | X                       | Y         | Z         |
| 1                | 6                | 0              | 0.276443                | -2.853848 | -0.359684 |

-----

|    |   |   |           |           |           |
|----|---|---|-----------|-----------|-----------|
| 2  | 6 | 0 | 0.633254  | -1.530265 | -0.571253 |
| 3  | 6 | 0 | -0.546338 | -0.691402 | -0.397365 |
| 4  | 6 | 0 | -1.559590 | -1.579650 | 0.026305  |
| 5  | 7 | 0 | -1.050053 | -2.869246 | 0.011054  |
| 6  | 6 | 0 | -2.871139 | -1.334597 | 0.664300  |
| 7  | 6 | 0 | -2.928736 | -0.544127 | 1.820534  |
| 8  | 6 | 0 | -4.060821 | -1.898282 | 0.175424  |
| 9  | 6 | 0 | -4.144822 | -0.307107 | 2.460443  |
| 10 | 6 | 0 | -5.274033 | -1.672153 | 0.821159  |
| 11 | 6 | 0 | -5.321138 | -0.871544 | 1.965262  |
| 12 | 6 | 0 | 2.092481  | -1.204121 | -0.594934 |
| 13 | 8 | 0 | 2.874759  | -1.573002 | -1.467907 |
| 14 | 6 | 0 | 1.084797  | -4.130490 | -0.475205 |
| 15 | 6 | 0 | 2.310925  | -4.169913 | 0.459950  |
| 16 | 6 | 0 | 1.480235  | -4.410019 | -1.940243 |
| 17 | 7 | 0 | 2.493258  | -0.545787 | 0.550024  |
| 18 | 6 | 0 | 3.732827  | 0.066913  | 0.817691  |
| 19 | 1 | 0 | 1.730345  | -0.247959 | 1.144026  |
| 20 | 6 | 0 | -1.745019 | -4.064647 | 0.478684  |
| 21 | 6 | 0 | 3.765169  | 1.041118  | 1.827897  |
| 22 | 6 | 0 | 4.954944  | 1.688166  | 2.145944  |
| 23 | 6 | 0 | 6.130975  | 1.378145  | 1.458822  |
| 24 | 6 | 0 | 6.095931  | 0.411276  | 0.453284  |
| 25 | 6 | 0 | 4.912025  | -0.251401 | 0.126749  |
| 26 | 1 | 0 | -2.012282 | -0.105421 | 2.204125  |
| 27 | 1 | 0 | -4.030191 | -2.492418 | -0.734260 |
| 28 | 1 | 0 | -4.171573 | 0.313743  | 3.352177  |
| 29 | 1 | 0 | -6.185904 | -2.112016 | 0.425435  |
| 30 | 1 | 0 | 0.434639  | -4.953955 | -0.161941 |
| 31 | 1 | 0 | 3.076270  | -3.455957 | 0.149113  |
| 32 | 1 | 0 | 2.759366  | -5.169900 | 0.435438  |
| 33 | 1 | 0 | 2.029141  | -3.946974 | 1.495175  |
| 34 | 1 | 0 | 2.129026  | -3.615169 | -2.313664 |
| 35 | 1 | 0 | 0.591744  | -4.460571 | -2.580383 |
| 36 | 1 | 0 | 2.009055  | -5.368440 | -2.012483 |
| 37 | 1 | 0 | -1.149584 | -4.576047 | 1.239849  |
| 38 | 1 | 0 | -2.695967 | -3.779315 | 0.921921  |
| 39 | 1 | 0 | -1.934679 | -4.755884 | -0.349021 |
| 40 | 1 | 0 | 2.846591  | 1.305690  | 2.347354  |
| 41 | 1 | 0 | 4.958974  | 2.443491  | 2.927307  |
| 42 | 1 | 0 | 7.060200  | 1.884831  | 1.703688  |
| 43 | 1 | 0 | 7.003518  | 0.160730  | -0.089984 |
| 44 | 1 | 0 | 4.884794  | -0.993291 | -0.658205 |
| 45 | 6 | 0 | -0.732261 | 0.776828  | -0.588608 |
| 46 | 6 | 0 | 0.355089  | 1.749978  | -0.679453 |
| 47 | 6 | 0 | -2.009890 | 1.342754  | -0.651933 |
| 48 | 6 | 0 | 1.601449  | 1.478585  | -1.295768 |
| 49 | 6 | 0 | 0.121599  | 3.109069  | -0.285005 |
| 50 | 6 | 0 | -2.248254 | 2.720038  | -0.328513 |
| 51 | 6 | 0 | 2.626033  | 2.404093  | -1.321491 |
| 52 | 1 | 0 | 1.740037  | 0.548081  | -1.825390 |
| 53 | 6 | 0 | 1.205930  | 4.024845  | -0.258398 |
| 54 | 6 | 0 | -1.202930 | 3.559183  | -0.033818 |
| 55 | 6 | 0 | 2.448971  | 3.674293  | -0.738607 |
| 56 | 1 | 0 | 3.566187  | 2.144983  | -1.798394 |
| 57 | 1 | 0 | 1.018215  | 5.034511  | 0.100601  |
| 58 | 1 | 0 | -1.360305 | 4.586129  | 0.275137  |
| 59 | 1 | 0 | 3.267268  | 4.388859  | -0.723109 |
| 60 | 1 | 0 | -6.268299 | -0.689976 | 2.466064  |

|    |   |   |           |          |           |
|----|---|---|-----------|----------|-----------|
| 61 | 8 | 0 | -3.119059 | 0.596272 | -0.956714 |
| 62 | 8 | 0 | -3.569077 | 3.064347 | -0.309001 |
| 63 | 6 | 0 | -3.583369 | 0.768925 | -2.294669 |
| 64 | 1 | 0 | -4.428641 | 0.084726 | -2.405301 |
| 65 | 1 | 0 | -3.920768 | 1.797378 | -2.468438 |
| 66 | 1 | 0 | -2.799894 | 0.508342 | -3.018696 |
| 67 | 6 | 0 | -3.892809 | 4.401314 | 0.033883  |
| 68 | 1 | 0 | -4.980909 | 4.469941 | -0.022543 |
| 69 | 1 | 0 | -3.566252 | 4.645665 | 1.054130  |
| 70 | 1 | 0 | -3.443120 | 5.118747 | -0.666622 |

-----

Compound 1f TS180

Method: b3lyp/6-31g(d) EmpiricalDispersion=GD3 opt(ts,noeigentest,addredun)

SCF Done: E(RB3LYP) = -1612.01364913 A.U. after 1 cycles

Lowest frequency = -30.2866

Zero-point correction= 0.579382  
(Hartree/Particle)  
Thermal correction to Energy= 0.612828  
Thermal correction to Enthalpy= 0.613773  
Thermal correction to Gibbs Free Energy= 0.514147  
Sum of electronic and zero-point Energies= -1611.434267  
Sum of electronic and thermal Energies= -1611.400821  
Sum of electronic and thermal Enthalpies= -1611.399877  
Sum of electronic and thermal Free Energies= -1611.499502

Standard orientation:

| Center<br>Number | Atomic<br>Number | Atomic<br>Type | Coordinates (Angstroms) |           |           |
|------------------|------------------|----------------|-------------------------|-----------|-----------|
|                  |                  |                | X                       | Y         | Z         |
| 1                | 6                | 0              | -0.500133               | -2.926385 | -0.254976 |
| 2                | 6                | 0              | 0.182595                | -1.739717 | -0.459584 |
| 3                | 6                | 0              | -0.768973               | -0.635670 | -0.414829 |
| 4                | 6                | 0              | -2.000974               | -1.229518 | -0.065587 |
| 5                | 7                | 0              | -1.818896               | -2.607862 | -0.012495 |
| 6                | 6                | 0              | -3.262878               | -0.666888 | 0.469161  |
| 7                | 6                | 0              | -3.222651               | 0.115114  | 1.633080  |
| 8                | 6                | 0              | -4.510224               | -0.920491 | -0.125780 |
| 9                | 6                | 0              | -4.390436               | 0.650281  | 2.173083  |
| 10               | 6                | 0              | -5.680063               | -0.390824 | 0.417008  |
| 11               | 6                | 0              | -5.622862               | 0.400126  | 1.567009  |
| 12               | 6                | 0              | 1.672382                | -1.706640 | -0.311025 |
| 13               | 8                | 0              | 2.462031                | -2.332111 | -1.011183 |
| 14               | 6                | 0              | -0.010851               | -4.359783 | -0.259017 |
| 15               | 6                | 0              | 1.036443                | -4.642395 | 0.837501  |
| 16               | 6                | 0              | 0.505277                | -4.766632 | -1.654669 |
| 17               | 7                | 0              | 2.049606                | -1.025507 | 0.842041  |
| 18               | 6                | 0              | 3.300804                | -0.419758 | 1.077643  |
| 19               | 1                | 0              | 1.277079                | -0.551925 | 1.293053  |
| 20               | 6                | 0              | -2.821377               | -3.585071 | 0.399610  |
| 21               | 6                | 0              | 3.325757                | 0.731399  | 1.880846  |
| 22               | 6                | 0              | 4.527382                | 1.382253  | 2.146053  |

|    |   |   |           |           |           |
|----|---|---|-----------|-----------|-----------|
| 23 | 6 | 0 | 5.722906  | 0.899499  | 1.609168  |
| 24 | 6 | 0 | 5.695283  | -0.246080 | 0.811594  |
| 25 | 6 | 0 | 4.500461  | -0.914871 | 0.546307  |
| 26 | 1 | 0 | -2.261268 | 0.320713  | 2.093564  |
| 27 | 1 | 0 | -4.552812 | -1.513003 | -1.036313 |
| 28 | 1 | 0 | -4.337104 | 1.266301  | 3.066444  |
| 29 | 1 | 0 | -6.634972 | -0.589042 | -0.062518 |
| 30 | 1 | 0 | -0.871742 | -5.000502 | -0.040402 |
| 31 | 1 | 0 | 1.970047  | -4.111693 | 0.640617  |
| 32 | 1 | 0 | 1.259024  | -5.715408 | 0.867342  |
| 33 | 1 | 0 | 0.668377  | -4.341890 | 1.825116  |
| 34 | 1 | 0 | 1.366226  | -4.153625 | -1.928942 |
| 35 | 1 | 0 | -0.274450 | -4.630761 | -2.413335 |
| 36 | 1 | 0 | 0.801739  | -5.822746 | -1.653978 |
| 37 | 1 | 0 | -2.438698 | -4.197787 | 1.220358  |
| 38 | 1 | 0 | -3.712623 | -3.067759 | 0.746364  |
| 39 | 1 | 0 | -3.095971 | -4.239315 | -0.434454 |
| 40 | 1 | 0 | 2.393654  | 1.127477  | 2.279453  |
| 41 | 1 | 0 | 4.526040  | 2.272738  | 2.769948  |
| 42 | 1 | 0 | 6.661899  | 1.406863  | 1.812618  |
| 43 | 1 | 0 | 6.618841  | -0.633801 | 0.388934  |
| 44 | 1 | 0 | 4.478003  | -1.797650 | -0.077044 |
| 45 | 6 | 0 | -0.456842 | 0.802967  | -0.644238 |
| 46 | 6 | 0 | -1.433489 | 1.885838  | -0.575620 |
| 47 | 6 | 0 | 0.842842  | 1.231638  | -0.925388 |
| 48 | 6 | 0 | -2.782883 | 1.737335  | -0.975139 |
| 49 | 6 | 0 | -0.996119 | 3.210425  | -0.246418 |
| 50 | 6 | 0 | 1.284054  | 2.569001  | -0.653983 |
| 51 | 6 | 0 | -3.695950 | 2.767054  | -0.870835 |
| 52 | 1 | 0 | -3.090973 | 0.802881  | -1.418675 |
| 53 | 6 | 0 | -1.962313 | 4.236622  | -0.077930 |
| 54 | 6 | 0 | 0.393533  | 3.512398  | -0.201050 |
| 55 | 6 | 0 | -3.293823 | 4.017798  | -0.360229 |
| 56 | 1 | 0 | -4.721266 | 2.609534  | -1.192678 |
| 57 | 1 | 0 | -1.619152 | 5.223577  | 0.224491  |
| 58 | 1 | 0 | 0.708919  | 4.514251  | 0.067412  |
| 59 | 1 | 0 | -4.016988 | 4.821089  | -0.246332 |
| 60 | 1 | 0 | -6.533297 | 0.819491  | 1.986313  |
| 61 | 8 | 0 | 1.807561  | 0.386747  | -1.405210 |
| 62 | 8 | 0 | 2.617069  | 2.755544  | -0.844693 |
| 63 | 6 | 0 | 1.784342  | 0.192600  | -2.821419 |
| 64 | 1 | 0 | 2.083469  | 1.112818  | -3.338191 |
| 65 | 1 | 0 | 2.500654  | -0.606997 | -3.014258 |
| 66 | 1 | 0 | 0.786832  | -0.117569 | -3.156561 |
| 67 | 6 | 0 | 3.187137  | 3.964676  | -0.374075 |
| 68 | 1 | 0 | 3.000710  | 4.099506  | 0.700008  |
| 69 | 1 | 0 | 4.261076  | 3.872107  | -0.543680 |
| 70 | 1 | 0 | 2.800337  | 4.836444  | -0.920426 |

-----

Compound 1g GS1

Method: b3lyp/6-31g(d) EmpiricalDispersion=GD3 opt freq

SCF Done: E(RB3LYP) = -1458.23436670 A.U. after 1 cycles

Lowest frequency = 17.9046

Zero-point correction= 0.519539  
(Hartree/Particle)  
Thermal correction to Energy= 0.549638  
Thermal correction to Enthalpy= 0.550583

Thermal correction to Gibbs Free Energy= 0.457550  
Sum of electronic and zero-point Energies= -1457.714827  
Sum of electronic and thermal Energies= -1457.684728  
Sum of electronic and thermal Enthalpies= -1457.683784  
Sum of electronic and thermal Free Energies= -1457.776816

Standard orientation:

| Center<br>Number | Atomic<br>Number | Atomic<br>Type | Coordinates (Angstroms) |           |           |
|------------------|------------------|----------------|-------------------------|-----------|-----------|
|                  |                  |                | X                       | Y         | Z         |
| 1                | 6                | 0              | 3.384299                | -0.439913 | 0.018206  |
| 2                | 6                | 0              | 5.419075                | -2.382074 | -0.001053 |
| 3                | 6                | 0              | 2.280011                | 0.534993  | 0.004310  |
| 4                | 6                | 0              | -3.317795               | 0.552743  | -0.728789 |
| 5                | 7                | 0              | 2.442973                | 1.911445  | 0.124156  |
| 6                | 6                | 0              | 0.920019                | 0.281493  | -0.115899 |
| 7                | 6                | 0              | 0.243037                | 1.552815  | -0.064172 |
| 8                | 6                | 0              | -1.227283               | 1.775211  | -0.072566 |
| 9                | 8                | 0              | -1.763449               | 2.718481  | 0.511856  |
| 10               | 6                | 0              | 1.215799                | 2.541925  | 0.085187  |
| 11               | 6                | 0              | 3.707627                | 2.578411  | 0.417857  |
| 12               | 6                | 0              | 1.119397                | 4.047945  | 0.185474  |
| 13               | 6                | 0              | 0.674126                | 4.485415  | 1.596003  |
| 14               | 6                | 0              | 0.231256                | 4.668300  | -0.909454 |
| 15               | 6                | 0              | 3.293440                | -1.580865 | 0.834302  |
| 16               | 6                | 0              | 4.299864                | -2.544149 | 0.819210  |
| 17               | 6                | 0              | 5.521660                | -1.252867 | -0.815599 |
| 18               | 6                | 0              | 4.509597                | -0.293742 | -0.812244 |
| 19               | 6                | 0              | -3.725143               | -0.720337 | -1.162039 |
| 20               | 6                | 0              | -5.072084               | -1.068945 | -1.148139 |
| 21               | 6                | 0              | -6.031979               | -0.158575 | -0.699668 |
| 22               | 6                | 0              | -5.623172               | 1.104412  | -0.268843 |
| 23               | 6                | 0              | -4.277618               | 1.473381  | -0.282063 |
| 24               | 6                | 0              | 0.316769                | -1.064266 | -0.288924 |
| 25               | 6                | 0              | -0.535557               | -1.641430 | 0.710438  |
| 26               | 6                | 0              | 0.555404                | -1.771897 | -1.464401 |
| 27               | 6                | 0              | -0.816149               | -0.982874 | 1.937705  |
| 28               | 6                | 0              | -1.148095               | -2.913830 | 0.467667  |
| 29               | 6                | 0              | -1.665910               | -1.546064 | 2.865286  |
| 30               | 6                | 0              | -2.015690               | -3.466158 | 1.444588  |
| 31               | 6                | 0              | -0.875928               | -3.585826 | -0.756135 |
| 32               | 6                | 0              | -2.275807               | -2.797970 | 2.620135  |
| 33               | 7                | 0              | -1.937296               | 0.830289  | -0.777982 |
| 34               | 1                | 0              | -1.382414               | 0.091058  | -1.189885 |
| 35               | 1                | 0              | 6.204309                | -3.132965 | -0.008363 |
| 36               | 1                | 0              | 4.447767                | 1.827636  | 0.691647  |
| 37               | 1                | 0              | 4.076790                | 3.137629  | -0.448621 |
| 38               | 1                | 0              | 3.583348                | 3.265438  | 1.258224  |
| 39               | 1                | 0              | 2.128349                | 4.444413  | 0.019076  |
| 40               | 1                | 0              | -0.329656               | 4.105339  | 1.796559  |
| 41               | 1                | 0              | 0.664686                | 5.579577  | 1.668169  |
| 42               | 1                | 0              | 1.355014                | 4.099267  | 2.364665  |
| 43               | 1                | 0              | -0.813558               | 4.385291  | -0.775269 |
| 44               | 1                | 0              | 0.557645                | 4.351639  | -1.906583 |
| 45               | 1                | 0              | 0.299607                | 5.761302  | -0.859711 |
| 46               | 1                | 0              | 2.426654                | -1.703222 | 1.475918  |
| 47               | 1                | 0              | 4.212572                | -3.420998 | 1.454928  |
| 48               | 1                | 0              | 6.383061                | -1.124487 | -1.465443 |



|    |   |   |           |           |           |
|----|---|---|-----------|-----------|-----------|
| 49 | 1 | 0 | 4.579780  | 0.567084  | -1.472472 |
| 50 | 1 | 0 | -2.978807 | -1.439770 | -1.492370 |
| 51 | 1 | 0 | -5.369586 | -2.059319 | -1.482790 |
| 52 | 1 | 0 | -7.083616 | -0.431001 | -0.686179 |
| 53 | 1 | 0 | -6.360315 | 1.822444  | 0.081602  |
| 54 | 1 | 0 | -3.960584 | 2.450105  | 0.054265  |
| 55 | 1 | 0 | -0.360441 | -0.017884 | 2.133480  |
| 56 | 1 | 0 | -1.872295 | -1.019849 | 3.793280  |
| 57 | 1 | 0 | -2.477647 | -4.430194 | 1.243735  |
| 58 | 1 | 0 | -1.341386 | -4.551415 | -0.938545 |
| 59 | 1 | 0 | -2.947791 | -3.227166 | 3.357874  |
| 60 | 8 | 0 | 1.349929  | -1.297602 | -2.461903 |
| 61 | 1 | 0 | 1.722462  | -0.447213 | -2.165852 |
| 62 | 6 | 0 | -0.044534 | -3.035929 | -1.697892 |
| 63 | 1 | 0 | 0.172648  | -3.537911 | -2.635110 |

Compound 1g GS2

Method: b3lyp/6-31g(d) EmpiricalDispersion=GD3 opt freq

SCF Done: E(RB3LYP) = -1458.23308374 A.U. after 1 cycles

Lowest frequency = 17.0083

Zero-point correction= 0.519392  
(Hartree/Particle)  
Thermal correction to Energy= 0.549607  
Thermal correction to Enthalpy= 0.550551  
Thermal correction to Gibbs Free Energy= 0.456877  
Sum of electronic and zero-point Energies= -1457.713692  
Sum of electronic and thermal Energies= -1457.683477  
Sum of electronic and thermal Enthalpies= -1457.682533  
Sum of electronic and thermal Free Energies= -1457.776206

Standard orientation:

| Center<br>Number | Atomic<br>Number | Atomic<br>Type | Coordinates (Angstroms) |           |           |
|------------------|------------------|----------------|-------------------------|-----------|-----------|
|                  |                  |                | X                       | Y         | Z         |
| 1                | 6                | 0              | 3.286591                | -0.661405 | 0.018193  |
| 2                | 6                | 0              | 5.213398                | -2.711157 | 0.011518  |
| 3                | 6                | 0              | 2.237742                | 0.372503  | -0.002608 |
| 4                | 6                | 0              | -3.374588               | 0.794028  | -0.711917 |
| 5                | 7                | 0              | 2.481889                | 1.738329  | 0.125263  |
| 6                | 6                | 0              | 0.866533                | 0.194288  | -0.130264 |
| 7                | 6                | 0              | 0.266865                | 1.501764  | -0.079162 |
| 8                | 6                | 0              | -1.177493               | 1.850538  | -0.112279 |
| 9                | 8                | 0              | -1.618010               | 2.884528  | 0.395223  |
| 10               | 6                | 0              | 1.291744                | 2.434440  | 0.077495  |
| 11               | 6                | 0              | 3.792945                | 2.305455  | 0.424626  |
| 12               | 6                | 0              | 1.158600                | 3.937114  | 0.171785  |
| 13               | 6                | 0              | 2.131317                | 4.734785  | -0.718547 |
| 14               | 6                | 0              | 1.167233                | 4.420766  | 1.635758  |
| 15               | 6                | 0              | 3.121082                | -1.803397 | 0.821372  |
| 16               | 6                | 0              | 4.073841                | -2.819837 | 0.812266  |
| 17               | 6                | 0              | 5.390744                | -1.580865 | -0.788649 |
| 18               | 6                | 0              | 4.432659                | -0.568048 | -0.791031 |
| 19               | 6                | 0              | -3.905442               | -0.453898 | -1.080689 |
| 20               | 6                | 0              | -5.281201               | -0.661600 | -1.074468 |
| 21               | 6                | 0              | -6.148518               | 0.366539  | -0.697454 |
| 22               | 6                | 0              | -5.617479               | 1.603813  | -0.329976 |

|    |   |   |           |           |           |
|----|---|---|-----------|-----------|-----------|
| 23 | 6 | 0 | -4.240983 | 1.832057  | -0.336529 |
| 24 | 6 | 0 | 0.188102  | -1.114244 | -0.309347 |
| 25 | 6 | 0 | -0.687288 | -1.652052 | 0.692148  |
| 26 | 6 | 0 | 0.382023  | -1.825950 | -1.490659 |
| 27 | 6 | 0 | -0.922849 | -0.988193 | 1.926011  |
| 28 | 6 | 0 | -1.370248 | -2.887137 | 0.444363  |
| 29 | 6 | 0 | -1.794381 | -1.511909 | 2.856470  |
| 30 | 6 | 0 | -2.259378 | -3.398962 | 1.424152  |
| 31 | 6 | 0 | -1.143117 | -3.563363 | -0.786421 |
| 32 | 6 | 0 | -2.473402 | -2.726932 | 2.606824  |
| 33 | 7 | 0 | -1.973036 | 0.924927  | -0.749212 |
| 34 | 1 | 0 | -1.490072 | 0.109953  | -1.105532 |
| 35 | 1 | 0 | 5.956813  | -3.503513 | 0.008740  |
| 36 | 1 | 0 | 4.422140  | 1.530912  | 0.863515  |
| 37 | 1 | 0 | 4.282042  | 2.688158  | -0.476700 |
| 38 | 1 | 0 | 3.688168  | 3.117576  | 1.143353  |
| 39 | 1 | 0 | 0.151001  | 4.139419  | -0.197213 |
| 40 | 1 | 0 | 3.149959  | 4.772464  | -0.321256 |
| 41 | 1 | 0 | 1.780800  | 5.770091  | -0.794802 |
| 42 | 1 | 0 | 2.175436  | 4.320591  | -1.732274 |
| 43 | 1 | 0 | 2.119616  | 4.216146  | 2.139929  |
| 44 | 1 | 0 | 0.365412  | 3.925709  | 2.190539  |
| 45 | 1 | 0 | 0.995859  | 5.502923  | 1.675474  |
| 46 | 1 | 0 | 2.239455  | -1.884447 | 1.449109  |
| 47 | 1 | 0 | 3.928799  | -3.696410 | 1.437738  |
| 48 | 1 | 0 | 6.269026  | -1.492658 | -1.422414 |
| 49 | 1 | 0 | 4.562136  | 0.295004  | -1.438875 |
| 50 | 1 | 0 | -3.232608 | -1.263502 | -1.355860 |
| 51 | 1 | 0 | -5.674483 | -1.634034 | -1.359232 |
| 52 | 1 | 0 | -7.222755 | 0.204375  | -0.690231 |
| 53 | 1 | 0 | -6.281483 | 2.412595  | -0.035366 |
| 54 | 1 | 0 | -3.829507 | 2.789312  | -0.050012 |
| 55 | 1 | 0 | -0.412875 | -0.051235 | 2.124323  |
| 56 | 1 | 0 | -1.964580 | -0.983001 | 3.790272  |
| 57 | 1 | 0 | -2.774443 | -4.335025 | 1.220143  |
| 58 | 1 | 0 | -1.661971 | -4.500538 | -0.972906 |
| 59 | 1 | 0 | -3.161760 | -3.124935 | 3.346944  |
| 60 | 8 | 0 | 1.198655  | -1.389983 | -2.486845 |
| 61 | 1 | 0 | 1.616751  | -0.562339 | -2.186727 |
| 62 | 6 | 0 | -0.288265 | -3.053046 | -1.729411 |
| 63 | 1 | 0 | -0.104742 | -3.559315 | -2.671479 |

Compound 1g GS3

Method: b3lyp/6-31g(d) EmpiricalDispersion=GD3 opt freq

SCF Done: E(RB3LYP) = -1458.23402202 A.U. after 1 cycles

Lowest frequency = 13.4623

|                                              |              |
|----------------------------------------------|--------------|
| Zero-point correction=                       | 0.519489     |
| (Hartree/Particle)                           |              |
| Thermal correction to Energy=                | 0.549686     |
| Thermal correction to Enthalpy=              | 0.550630     |
| Thermal correction to Gibbs Free Energy=     | 0.456808     |
| Sum of electronic and zero-point Energies=   | -1457.714533 |
| Sum of electronic and thermal Energies=      | -1457.684336 |
| Sum of electronic and thermal Enthalpies=    | -1457.683392 |
| Sum of electronic and thermal Free Energies= | -1457.777214 |

Standard orientation:

| Center<br>Number | Atomic<br>Number | Atomic<br>Type | Coordinates (Angstroms) |           |           |
|------------------|------------------|----------------|-------------------------|-----------|-----------|
|                  |                  |                | X                       | Y         | Z         |
| 1                | 6                | 0              | 3.353989                | -0.177242 | 0.057615  |
| 2                | 6                | 0              | 5.540153                | -1.945854 | 0.113822  |
| 3                | 6                | 0              | 2.178665                | 0.709083  | 0.019299  |
| 4                | 6                | 0              | -3.496764               | 0.363218  | -0.067790 |
| 5                | 7                | 0              | 2.229249                | 2.057977  | -0.310092 |
| 6                | 6                | 0              | 0.848051                | 0.378431  | 0.231105  |
| 7                | 6                | 0              | 0.073317                | 1.577859  | 0.030183  |
| 8                | 6                | 0              | -1.397508               | 1.726759  | 0.210274  |
| 9                | 8                | 0              | -1.909673               | 2.737369  | 0.695724  |
| 10               | 6                | 0              | 0.959097                | 2.600860  | -0.302930 |
| 11               | 6                | 0              | 3.456456                | 2.828748  | -0.483319 |
| 12               | 6                | 0              | 0.735915                | 4.063477  | -0.613885 |
| 13               | 6                | 0              | 0.519998                | 4.877996  | 0.678380  |
| 14               | 6                | 0              | -0.403739               | 4.295847  | -1.623598 |
| 15               | 6                | 0              | 4.232310                | -0.268500 | -1.036366 |
| 16               | 6                | 0              | 5.319663                | -1.140340 | -1.005543 |
| 17               | 6                | 0              | 4.669203                | -1.869588 | 1.202778  |
| 18               | 6                | 0              | 3.588418                | -0.989467 | 1.179861  |
| 19               | 6                | 0              | -3.926426               | -0.915930 | -0.463330 |
| 20               | 6                | 0              | -5.267709               | -1.269564 | -0.355499 |
| 21               | 6                | 0              | -6.200063               | -0.359728 | 0.149314  |
| 22               | 6                | 0              | -5.768868               | 0.908056  | 0.542142  |
| 23               | 6                | 0              | -4.428795               | 1.282798  | 0.437582  |
| 24               | 6                | 0              | 0.339363                | -0.968824 | 0.594368  |
| 25               | 6                | 0              | -0.066645               | -1.915144 | -0.397921 |
| 26               | 6                | 0              | 0.191803                | -1.293947 | 1.934777  |
| 27               | 6                | 0              | 0.039477                | -1.641435 | -1.790210 |
| 28               | 6                | 0              | -0.637705               | -3.166250 | 0.008693  |
| 29               | 6                | 0              | -0.413986               | -2.546159 | -2.727177 |
| 30               | 6                | 0              | -1.086106               | -4.076661 | -0.982186 |
| 31               | 6                | 0              | -0.753224               | -3.448193 | 1.397579  |
| 32               | 6                | 0              | -0.985149               | -3.775492 | -2.323667 |
| 33               | 7                | 0              | -2.124083               | 0.639785  | -0.212704 |
| 34               | 1                | 0              | -1.594843               | -0.107056 | -0.641135 |
| 35               | 1                | 0              | 6.383976                | -2.630045 | 0.135874  |
| 36               | 1                | 0              | 3.591244                | 3.133701  | -1.526411 |
| 37               | 1                | 0              | 3.433931                | 3.720860  | 0.147824  |
| 38               | 1                | 0              | 4.304784                | 2.213198  | -0.186838 |
| 39               | 1                | 0              | 1.650486                | 4.434078  | -1.092946 |
| 40               | 1                | 0              | -0.383999               | 4.528550  | 1.182283  |
| 41               | 1                | 0              | 0.411025                | 5.943569  | 0.443424  |
| 42               | 1                | 0              | 1.368232                | 4.766175  | 1.365140  |
| 43               | 1                | 0              | -1.371231               | 4.032611  | -1.193064 |
| 44               | 1                | 0              | -0.250524               | 3.704602  | -2.533468 |
| 45               | 1                | 0              | -0.433427               | 5.354750  | -1.905495 |
| 46               | 1                | 0              | 4.044749                | 0.333403  | -1.921724 |
| 47               | 1                | 0              | 5.986773                | -1.200234 | -1.861349 |
| 48               | 1                | 0              | 4.834778                | -2.492082 | 2.077891  |
| 49               | 1                | 0              | 2.923879                | -0.920391 | 2.034997  |
| 50               | 1                | 0              | -3.203017               | -1.632497 | -0.847354 |
| 51               | 1                | 0              | -5.582828               | -2.262776 | -0.664791 |
| 52               | 1                | 0              | -7.247226               | -0.636174 | 0.234779  |
| 53               | 1                | 0              | -6.484017               | 1.625764  | 0.936110  |
| 54               | 1                | 0              | -4.095313               | 2.265192  | 0.739785  |
| 55               | 1                | 0              | 0.485189                | -0.701842 | -2.103305 |

|    |   |   |           |           |           |
|----|---|---|-----------|-----------|-----------|
| 56 | 1 | 0 | -0.328711 | -2.314468 | -3.785462 |
| 57 | 1 | 0 | -1.519995 | -5.021154 | -0.661606 |
| 58 | 1 | 0 | -1.182481 | -4.398308 | 1.705630  |
| 59 | 1 | 0 | -1.339307 | -4.479454 | -3.071330 |
| 60 | 8 | 0 | 0.564591  | -0.440075 | 2.930122  |
| 61 | 1 | 0 | 0.835706  | 0.397282  | 2.508799  |
| 62 | 6 | 0 | -0.343230 | -2.541422 | 2.341072  |
| 63 | 1 | 0 | -0.433105 | -2.740312 | 3.404019  |

Compound 1g GS4

Method: b3lyp/6-31g(d) EmpiricalDispersion=GD3 opt freq

SCF Done: E(RB3LYP) = -1458.23253436 A.U. after 1 cycles

Lowest frequency = 11.0350

Zero-point correction= 0.519233  
(Hartree/Particle)  
Thermal correction to Energy= 0.549591  
Thermal correction to Enthalpy= 0.550535  
Thermal correction to Gibbs Free Energy= 0.455776  
Sum of electronic and zero-point Energies= -1457.713302  
Sum of electronic and thermal Energies= -1457.682943  
Sum of electronic and thermal Enthalpies= -1457.681999  
Sum of electronic and thermal Free Energies= -1457.776758

Standard orientation:

| Center<br>Number | Atomic<br>Number | Atomic<br>Type | Coordinates (Angstroms) |           |           |
|------------------|------------------|----------------|-------------------------|-----------|-----------|
|                  |                  |                | X                       | Y         | Z         |
| 1                | 6                | 0              | 3.249275                | -0.363550 | -0.194629 |
| 2                | 6                | 0              | 5.343588                | -2.233999 | -0.349149 |
| 3                | 6                | 0              | 2.119961                | 0.576643  | -0.104669 |
| 4                | 6                | 0              | -3.583782               | 0.566304  | 0.037435  |
| 5                | 7                | 0              | 2.256001                | 1.927990  | 0.196423  |
| 6                | 6                | 0              | 0.767989                | 0.305799  | -0.247927 |
| 7                | 6                | 0              | 0.064589                | 1.545017  | -0.031494 |
| 8                | 6                | 0              | -1.397354               | 1.805089  | -0.120291 |
| 9                | 8                | 0              | -1.850796               | 2.916404  | -0.405182 |
| 10               | 6                | 0              | 1.013919                | 2.528772  | 0.245415  |
| 11               | 6                | 0              | 3.542354                | 2.610840  | 0.296123  |
| 12               | 6                | 0              | 0.765089                | 3.989496  | 0.543636  |
| 13               | 6                | 0              | 0.947419                | 4.869337  | -0.709271 |
| 14               | 6                | 0              | 1.522966                | 4.543001  | 1.766174  |
| 15               | 6                | 0              | 3.374976                | -1.206377 | -1.311928 |
| 16               | 6                | 0              | 4.410339                | -2.136886 | -1.383483 |
| 17               | 6                | 0              | 5.231964                | -1.397689 | 0.763846  |
| 18               | 6                | 0              | 4.190556                | -0.474614 | 0.843388  |
| 19               | 6                | 0              | -4.461094               | 1.624386  | -0.247628 |
| 20               | 6                | 0              | -5.830755               | 1.371360  | -0.332231 |
| 21               | 6                | 0              | -6.345578               | 0.089445  | -0.134342 |
| 22               | 6                | 0              | -5.467785               | -0.959217 | 0.151362  |
| 23               | 6                | 0              | -4.098609               | -0.727185 | 0.235524  |
| 24               | 6                | 0              | 0.185564                | -1.027698 | -0.546115 |
| 25               | 6                | 0              | -0.162655               | -1.948452 | 0.492922  |
| 26               | 6                | 0              | -0.078739               | -1.367075 | -1.865573 |
| 27               | 6                | 0              | 0.065623                | -1.659339 | 1.866692  |
| 28               | 6                | 0              | -0.789458               | -3.193127 | 0.152207  |
| 29               | 6                | 0              | -0.308731               | -2.550988 | 2.848602  |

|    |   |   |           |           |           |
|----|---|---|-----------|-----------|-----------|
| 30 | 6 | 0 | -1.157786 | -4.089090 | 1.189152  |
| 31 | 6 | 0 | -1.031817 | -3.486641 | -1.217867 |
| 32 | 6 | 0 | -0.926543 | -3.778254 | 2.511261  |
| 33 | 7 | 0 | -2.188268 | 0.711646  | 0.144765  |
| 34 | 1 | 0 | -1.700862 | -0.137273 | 0.396581  |
| 35 | 1 | 0 | 6.151918  | -2.957659 | -0.408766 |
| 36 | 1 | 0 | 4.300460  | 2.011145  | -0.207804 |
| 37 | 1 | 0 | 3.484608  | 3.583964  | -0.191223 |
| 38 | 1 | 0 | 3.841905  | 2.751500  | 1.339141  |
| 39 | 1 | 0 | -0.299552 | 4.035922  | 0.781973  |
| 40 | 1 | 0 | 1.977645  | 4.855047  | -1.085583 |
| 41 | 1 | 0 | 0.692521  | 5.910503  | -0.478974 |
| 42 | 1 | 0 | 0.280994  | 4.520911  | -1.503248 |
| 43 | 1 | 0 | 2.580985  | 4.737537  | 1.567020  |
| 44 | 1 | 0 | 1.456333  | 3.859126  | 2.619977  |
| 45 | 1 | 0 | 1.074480  | 5.497057  | 2.064888  |
| 46 | 1 | 0 | 2.661448  | -1.121010 | -2.125176 |
| 47 | 1 | 0 | 4.491691  | -2.782443 | -2.253739 |
| 48 | 1 | 0 | 5.948909  | -1.472611 | 1.577100  |
| 49 | 1 | 0 | 4.088991  | 0.153299  | 1.724494  |
| 50 | 1 | 0 | -4.063345 | 2.617574  | -0.398832 |
| 51 | 1 | 0 | -6.502556 | 2.196557  | -0.554842 |
| 52 | 1 | 0 | -7.414733 | -0.091298 | -0.201415 |
| 53 | 1 | 0 | -5.848061 | -1.965466 | 0.307269  |
| 54 | 1 | 0 | -3.418151 | -1.549155 | 0.450063  |
| 55 | 1 | 0 | 0.541537  | -0.719313 | 2.128152  |
| 56 | 1 | 0 | -0.127533 | -2.310092 | 3.892676  |
| 57 | 1 | 0 | -1.631386 | -5.030255 | 0.918969  |
| 58 | 1 | 0 | -1.506934 | -4.430046 | -1.475243 |
| 59 | 1 | 0 | -1.216938 | -4.471502 | 3.295574  |
| 60 | 8 | 0 | 0.241454  | -0.539513 | -2.900018 |
| 61 | 1 | 0 | 0.583537  | 0.289096  | -2.514438 |
| 62 | 6 | 0 | -0.682281 | -2.602157 | -2.206536 |
| 63 | 1 | 0 | -0.866515 | -2.812603 | -3.254960 |

-----

Compound 1g TS0

Method: b3lyp/6-31g(d) EmpiricalDispersion=GD3 opt(ts,noeigentest,addredun)

SCF Done: E(RB3LYP) = -1458.17925643 A.U. after 1 cycles

Lowest frequency = -22.2793

Zero-point correction= 0.518200  
(Hartree/Particle)  
Thermal correction to Energy= 0.547463  
Thermal correction to Enthalpy= 0.548407  
Thermal correction to Gibbs Free Energy= 0.458840  
Sum of electronic and zero-point Energies= -1457.661056  
Sum of electronic and thermal Energies= -1457.631794  
Sum of electronic and thermal Enthalpies= -1457.630849  
Sum of electronic and thermal Free Energies= -1457.720417

Standard orientation:

| Center<br>Number | Atomic<br>Number | Atomic<br>Type | Coordinates (Angstroms) |          |           |
|------------------|------------------|----------------|-------------------------|----------|-----------|
|                  |                  |                | X                       | Y        | Z         |
| 1                | 6                | 0              | 0.758277                | 2.497152 | -0.317692 |
| 2                | 6                | 0              | 0.056220                | 1.327971 | -0.577997 |
| 3                | 6                | 0              | 0.975746                | 0.200779 | -0.510686 |

|    |   |   |           |           |           |
|----|---|---|-----------|-----------|-----------|
| 4  | 6 | 0 | 2.202467  | 0.764824  | -0.101721 |
| 5  | 7 | 0 | 2.054468  | 2.142050  | -0.022842 |
| 6  | 6 | 0 | 3.427389  | 0.137767  | 0.439840  |
| 7  | 6 | 0 | 3.325902  | -0.701972 | 1.559750  |
| 8  | 6 | 0 | 4.698319  | 0.365649  | -0.113979 |
| 9  | 6 | 0 | 4.458033  | -1.316710 | 2.096258  |
| 10 | 6 | 0 | 5.832151  | -0.236644 | 0.429468  |
| 11 | 6 | 0 | 5.715818  | -1.085754 | 1.534187  |
| 12 | 6 | 0 | -1.437245 | 1.390879  | -0.553458 |
| 13 | 8 | 0 | -2.122325 | 2.003520  | -1.368983 |
| 14 | 6 | 0 | 0.310770  | 3.944585  | -0.322829 |
| 15 | 6 | 0 | -0.833428 | 4.237857  | 0.669240  |
| 16 | 6 | 0 | -0.043340 | 4.413502  | -1.749596 |
| 17 | 7 | 0 | -1.961946 | 0.783614  | 0.569785  |
| 18 | 6 | 0 | -3.309130 | 0.492160  | 0.858560  |
| 19 | 1 | 0 | -1.284803 | 0.265483  | 1.114264  |
| 20 | 6 | 0 | 3.070033  | 3.080701  | 0.441893  |
| 21 | 6 | 0 | -3.562241 | -0.502353 | 1.816454  |
| 22 | 6 | 0 | -4.868841 | -0.844445 | 2.149839  |
| 23 | 6 | 0 | -5.944629 | -0.203832 | 1.530501  |
| 24 | 6 | 0 | -5.690705 | 0.782886  | 0.577010  |
| 25 | 6 | 0 | -4.385989 | 1.141820  | 0.236006  |
| 26 | 1 | 0 | 2.346489  | -0.884720 | 1.991449  |
| 27 | 1 | 0 | 4.783658  | 0.989529  | -0.999122 |
| 28 | 1 | 0 | 4.358170  | -1.969978 | 2.959131  |
| 29 | 1 | 0 | 6.806025  | -0.053762 | -0.017077 |
| 30 | 1 | 0 | 1.163347  | 4.548142  | 0.006137  |
| 31 | 1 | 0 | -1.768074 | 3.769705  | 0.353894  |
| 32 | 1 | 0 | -1.004816 | 5.319243  | 0.722818  |
| 33 | 1 | 0 | -0.589040 | 3.880129  | 1.675770  |
| 34 | 1 | 0 | -0.889013 | 3.840191  | -2.134983 |
| 35 | 1 | 0 | 0.806382  | 4.273794  | -2.427882 |
| 36 | 1 | 0 | -0.305187 | 5.478781  | -1.743337 |
| 37 | 1 | 0 | 2.681122  | 3.685619  | 1.265595  |
| 38 | 1 | 0 | 3.935095  | 2.528811  | 0.802369  |
| 39 | 1 | 0 | 3.388560  | 3.745150  | -0.368019 |
| 40 | 1 | 0 | -2.728208 | -1.023826 | 2.281351  |
| 41 | 1 | 0 | -5.044747 | -1.620997 | 2.889485  |
| 42 | 1 | 0 | -6.965542 | -0.472028 | 1.787273  |
| 43 | 1 | 0 | -6.518391 | 1.288963  | 0.086678  |
| 44 | 1 | 0 | -4.190948 | 1.899363  | -0.509239 |
| 45 | 6 | 0 | 0.752393  | -1.252526 | -0.760643 |
| 46 | 6 | 0 | -0.551463 | -1.897867 | -0.854687 |
| 47 | 6 | 0 | 1.825518  | -2.150547 | -0.876711 |
| 48 | 6 | 0 | -1.693945 | -1.279683 | -1.424678 |
| 49 | 6 | 0 | -0.695178 | -3.280040 | -0.484527 |
| 50 | 6 | 0 | -2.928117 | -1.896357 | -1.443170 |
| 51 | 1 | 0 | -1.588472 | -0.325707 | -1.920282 |
| 52 | 6 | 0 | -1.984823 | -3.873710 | -0.458695 |
| 53 | 6 | 0 | 0.468047  | -4.061530 | -0.261309 |
| 54 | 6 | 0 | -3.093637 | -3.188104 | -0.900703 |
| 55 | 1 | 0 | -3.773316 | -1.378924 | -1.886788 |
| 56 | 1 | 0 | -2.068851 | -4.906593 | -0.127596 |
| 57 | 1 | 0 | 0.369819  | -5.101555 | 0.038439  |
| 58 | 1 | 0 | -4.074731 | -3.654125 | -0.886821 |
| 59 | 1 | 0 | 6.598614  | -1.560039 | 1.954269  |
| 60 | 6 | 0 | 1.693326  | -3.524787 | -0.557573 |
| 61 | 1 | 0 | 2.591202  | -4.139712 | -0.547184 |
| 62 | 8 | 0 | 3.032103  | -1.699454 | -1.336789 |

63 1 0 3.753587 -2.223138 -0.953142

Compound 1g TS180

Method: b3lyp/6-31g(d) EmpiricalDispersion=GD3 opt(ts,noeigentest,addredun)

SCF Done: E(RB3LYP) = -1458.18169784 A.U. after 1 cycles

Lowest frequency = -17.5891

Zero-point correction= 0.518639  
 (Hartree/Particle)  
 Thermal correction to Energy= 0.547605  
 Thermal correction to Enthalpy= 0.548549  
 Thermal correction to Gibbs Free Energy= 0.459967  
 Sum of electronic and zero-point Energies= -1457.663059  
 Sum of electronic and thermal Energies= -1457.634093  
 Sum of electronic and thermal Enthalpies= -1457.633148  
 Sum of electronic and thermal Free Energies= -1457.721731

Standard orientation:

| Center<br>Number | Atomic<br>Number | Atomic<br>Type | Coordinates (Angstroms) |           |           |
|------------------|------------------|----------------|-------------------------|-----------|-----------|
|                  |                  |                | X                       | Y         | Z         |
| 1                | 6                | 0              | -0.124591               | 2.744832  | -0.203175 |
| 2                | 6                | 0              | -0.627864               | 1.481869  | -0.466382 |
| 3                | 6                | 0              | 0.472015                | 0.522837  | -0.484801 |
| 4                | 6                | 0              | 1.608078                | 1.274405  | -0.118315 |
| 5                | 7                | 0              | 1.227727                | 2.609150  | 0.009647  |
| 6                | 6                | 0              | 2.957179                | 0.896877  | 0.365515  |
| 7                | 6                | 0              | 3.075927                | 0.128479  | 1.532631  |
| 8                | 6                | 0              | 4.130116                | 1.326075  | -0.278227 |
| 9                | 6                | 0              | 4.329577                | -0.223809 | 2.029997  |
| 10               | 6                | 0              | 5.384789                | 0.976799  | 0.219546  |
| 11               | 6                | 0              | 5.487823                | 0.197288  | 1.374641  |
| 12               | 6                | 0              | -2.091224               | 1.224293  | -0.363115 |
| 13               | 8                | 0              | -2.960895               | 1.805949  | -1.000254 |
| 14               | 6                | 0              | -0.812692               | 4.091918  | -0.122747 |
| 15               | 6                | 0              | -1.894393               | 4.154242  | 0.974800  |
| 16               | 6                | 0              | -1.369990               | 4.517384  | -1.496765 |
| 17               | 7                | 0              | -2.390151               | 0.331701  | 0.667863  |
| 18               | 6                | 0              | -3.545588               | -0.465333 | 0.771852  |
| 19               | 1                | 0              | -1.570987               | -0.068218 | 1.108115  |
| 20               | 6                | 0              | 2.089947                | 3.701608  | 0.448200  |
| 21               | 6                | 0              | -3.443887               | -1.673204 | 1.486084  |
| 22               | 6                | 0              | -4.543912               | -2.517121 | 1.609027  |
| 23               | 6                | 0              | -5.762534               | -2.180889 | 1.014018  |
| 24               | 6                | 0              | -5.862520               | -0.984827 | 0.302366  |
| 25               | 6                | 0              | -4.773026               | -0.120234 | 0.179613  |
| 26               | 1                | 0              | 2.172983                | -0.210659 | 2.031146  |
| 27               | 1                | 0              | 4.049158                | 1.914417  | -1.188787 |
| 28               | 1                | 0              | 4.401421                | -0.831772 | 2.927625  |
| 29               | 1                | 0              | 6.281612                | 1.308312  | -0.297072 |
| 30               | 1                | 0              | -0.052075               | 4.830053  | 0.152475  |
| 31               | 1                | 0              | -2.744711               | 3.513838  | 0.732745  |
| 32               | 1                | 0              | -2.264353               | 5.181834  | 1.069643  |
| 33               | 1                | 0              | -1.491378               | 3.845700  | 1.946296  |
| 34               | 1                | 0              | -2.136093               | 3.812743  | -1.825902 |
| 35               | 1                | 0              | -0.573721               | 4.540569  | -2.249883 |
| 36               | 1                | 0              | -1.808378               | 5.520841  | -1.431062 |

|    |   |   |           |           |           |
|----|---|---|-----------|-----------|-----------|
| 37 | 1 | 0 | 1.663660  | 4.195265  | 1.326172  |
| 38 | 1 | 0 | 3.066748  | 3.308206  | 0.718238  |
| 39 | 1 | 0 | 2.217493  | 4.441343  | -0.348867 |
| 40 | 1 | 0 | -2.491575 | -1.954045 | 1.929889  |
| 41 | 1 | 0 | -4.443133 | -3.445280 | 2.165430  |
| 42 | 1 | 0 | -6.620154 | -2.841047 | 1.106274  |
| 43 | 1 | 0 | -6.805059 | -0.707605 | -0.162689 |
| 44 | 1 | 0 | -4.853981 | 0.810037  | -0.364402 |
| 45 | 6 | 0 | 0.344530  | -0.935479 | -0.774555 |
| 46 | 6 | 0 | 1.422337  | -1.912374 | -0.673798 |
| 47 | 6 | 0 | -0.880133 | -1.510627 | -1.155930 |
| 48 | 6 | 0 | 2.771194  | -1.615258 | -0.990630 |
| 49 | 6 | 0 | 1.125654  | -3.288682 | -0.386549 |
| 50 | 6 | 0 | 3.781194  | -2.544375 | -0.850449 |
| 51 | 1 | 0 | 3.003226  | -0.649210 | -1.409160 |
| 52 | 6 | 0 | 2.184760  | -4.211801 | -0.184963 |
| 53 | 6 | 0 | -0.223428 | -3.728503 | -0.429873 |
| 54 | 6 | 0 | 3.497332  | -3.845596 | -0.385229 |
| 55 | 1 | 0 | 4.798019  | -2.268752 | -1.115553 |
| 56 | 1 | 0 | 1.931196  | -5.236651 | 0.077297  |
| 57 | 1 | 0 | -0.464579 | -4.759686 | -0.186076 |
| 58 | 1 | 0 | 4.298462  | -4.566736 | -0.248126 |
| 59 | 1 | 0 | 6.465256  | -0.079793 | 1.759993  |
| 60 | 6 | 0 | -1.181681 | -2.874670 | -0.907327 |
| 61 | 1 | 0 | -2.198935 | -3.215528 | -1.085106 |
| 62 | 8 | 0 | -1.806916 | -0.744080 | -1.802014 |
| 63 | 1 | 0 | -2.700615 | -1.105822 | -1.675839 |

Compound 1h GS1

Method: b3lyp/6-31g(d) EmpiricalDispersion=GD3 opt freq

SCF Done: E(RB3LYP) = -1728.60459680 A.U. after 1 cycles

Lowest frequency = 13.3814

Zero-point correction= 0.629694  
(Hartree/Particle)  
Thermal correction to Energy= 0.665627  
Thermal correction to Enthalpy= 0.666571  
Thermal correction to Gibbs Free Energy= 0.559654  
Sum of electronic and zero-point Energies= -1727.974902  
Sum of electronic and thermal Energies= -1727.938970  
Sum of electronic and thermal Enthalpies= -1727.938026  
Sum of electronic and thermal Free Energies= -1728.044943

Standard orientation:

| Center<br>Number | Atomic<br>Number | Atomic<br>Type | Coordinates (Angstroms) |           |          |
|------------------|------------------|----------------|-------------------------|-----------|----------|
|                  |                  |                | X                       | Y         | Z        |
| 1                | 6                | 0              | -1.819729               | -1.283940 | 0.278228 |
| 2                | 6                | 0              | 3.163574                | 1.516491  | 0.934697 |
| 3                | 7                | 0              | -1.378589               | -2.349671 | 1.055803 |
| 4                | 6                | 0              | -0.868969               | -0.272470 | 0.370388 |
| 5                | 6                | 0              | 0.160409                | -0.739331 | 1.258370 |
| 6                | 6                | 0              | 1.333670                | 0.023526  | 1.778733 |
| 7                | 8                | 0              | 1.639282                | 0.020006  | 2.973723 |
| 8                | 6                | 0              | -0.178693               | -2.030336 | 1.659997 |
| 9                | 6                | 0              | -1.974415               | -3.681660 | 1.062859 |
| 10               | 6                | 0              | 0.512334                | -3.001450 | 2.590435 |



|    |   |   |           |           |           |
|----|---|---|-----------|-----------|-----------|
| 11 | 6 | 0 | 0.207072  | -2.652510 | 4.063144  |
| 12 | 6 | 0 | 2.027225  | -3.114913 | 2.340345  |
| 13 | 6 | 0 | 3.689834  | 2.042661  | -0.258917 |
| 14 | 6 | 0 | 4.806219  | 2.872139  | -0.227988 |
| 15 | 6 | 0 | 5.415595  | 3.192937  | 0.987867  |
| 16 | 6 | 0 | 4.890225  | 2.669348  | 2.169968  |
| 17 | 6 | 0 | 3.772602  | 1.833785  | 2.159235  |
| 18 | 6 | 0 | -1.032791 | 1.062169  | -0.262226 |
| 19 | 6 | 0 | -2.055681 | 1.963193  | 0.190478  |
| 20 | 6 | 0 | -0.253353 | 1.449692  | -1.341730 |
| 21 | 6 | 0 | -2.871565 | 1.674501  | 1.318406  |
| 22 | 6 | 0 | -2.266307 | 3.203744  | -0.498232 |
| 23 | 6 | 0 | -0.445924 | 2.678215  | -2.011391 |
| 24 | 6 | 0 | -3.852815 | 2.548729  | 1.727628  |
| 25 | 6 | 0 | -3.291243 | 4.081055  | -0.052807 |
| 26 | 6 | 0 | -1.440348 | 3.533076  | -1.604427 |
| 27 | 6 | 0 | -4.072925 | 3.762162  | 1.033141  |
| 28 | 7 | 0 | 2.034171  | 0.687722  | 0.809716  |
| 29 | 1 | 0 | 1.721688  | 0.537023  | -0.146963 |
| 30 | 8 | 0 | 0.824598  | 0.677420  | -1.762250 |
| 31 | 6 | 0 | 0.534830  | -0.493024 | -2.564449 |
| 32 | 1 | 0 | -2.822092 | -3.696469 | 0.379959  |
| 33 | 1 | 0 | -1.246791 | -4.426714 | 0.727695  |
| 34 | 1 | 0 | -2.322557 | -3.951792 | 2.064908  |
| 35 | 1 | 0 | 0.092132  | -3.995788 | 2.397270  |
| 36 | 1 | 0 | 0.607197  | -1.663101 | 4.294756  |
| 37 | 1 | 0 | 0.662112  | -3.393133 | 4.732061  |
| 38 | 1 | 0 | -0.873946 | -2.643967 | 4.248219  |
| 39 | 1 | 0 | 2.539612  | -2.179145 | 2.570955  |
| 40 | 1 | 0 | 2.235481  | -3.384692 | 1.298596  |
| 41 | 1 | 0 | 2.448493  | -3.897096 | 2.982377  |
| 42 | 1 | 0 | 3.213539  | 1.793395  | -1.204017 |
| 43 | 1 | 0 | 5.200784  | 3.269691  | -1.159706 |
| 44 | 1 | 0 | 6.287308  | 3.841063  | 1.012053  |
| 45 | 1 | 0 | 5.354783  | 2.910613  | 3.122879  |
| 46 | 1 | 0 | 3.368673  | 1.425206  | 3.074404  |
| 47 | 1 | 0 | -2.704033 | 0.751292  | 1.861113  |
| 48 | 1 | 0 | -4.462224 | 2.307293  | 2.594293  |
| 49 | 1 | 0 | -3.442966 | 5.015964  | -0.587376 |
| 50 | 1 | 0 | -1.598148 | 4.478017  | -2.118306 |
| 51 | 1 | 0 | -4.853214 | 4.441728  | 1.364783  |
| 52 | 1 | 0 | 0.190106  | -0.167679 | -3.554613 |
| 53 | 1 | 0 | -0.261925 | -1.067394 | -2.081254 |
| 54 | 1 | 0 | 0.213652  | 2.917846  | -2.839493 |
| 55 | 6 | 0 | -3.143554 | -1.239333 | -0.365175 |
| 56 | 6 | 0 | -4.302058 | -1.602297 | 0.346982  |
| 57 | 6 | 0 | -3.294600 | -0.759084 | -1.676904 |
| 58 | 6 | 0 | -5.562832 | -1.509228 | -0.239607 |
| 59 | 1 | 0 | -4.210620 | -1.932948 | 1.378063  |
| 60 | 6 | 0 | -4.556711 | -0.652905 | -2.257554 |
| 61 | 1 | 0 | -2.417691 | -0.454721 | -2.236955 |
| 62 | 6 | 0 | -5.695903 | -1.033440 | -1.545430 |
| 63 | 1 | 0 | -6.443461 | -1.792280 | 0.330911  |
| 64 | 1 | 0 | -4.649561 | -0.274558 | -3.272039 |
| 65 | 1 | 0 | -6.678956 | -0.952545 | -2.000958 |
| 66 | 6 | 0 | 1.800219  | -1.300495 | -2.649207 |
| 67 | 6 | 0 | 2.582444  | -1.306924 | -3.807258 |
| 68 | 6 | 0 | 2.232455  | -2.017755 | -1.525205 |
| 69 | 6 | 0 | 3.778851  | -2.026375 | -3.848231 |

|    |   |   |          |           |           |
|----|---|---|----------|-----------|-----------|
| 70 | 1 | 0 | 2.255822 | -0.744428 | -4.678990 |
| 71 | 6 | 0 | 3.431243 | -2.726433 | -1.560063 |
| 72 | 1 | 0 | 1.630025 | -2.004063 | -0.620768 |
| 73 | 6 | 0 | 4.205651 | -2.734519 | -2.723852 |
| 74 | 1 | 0 | 4.379010 | -2.027867 | -4.754140 |
| 75 | 1 | 0 | 3.763376 | -3.269911 | -0.679546 |
| 76 | 1 | 0 | 5.140062 | -3.288589 | -2.752077 |

Compound 1h GS2

Method: b3lyp/6-31g(d) EmpiricalDispersion=GD3 opt freq

SCF Done: E(RB3LYP) = -1728.60195902 A.U. after 1 cycles

Lowest frequency = 12.7113

Zero-point correction= 0.629438  
(Hartree/Particle)  
Thermal correction to Energy= 0.665553  
Thermal correction to Enthalpy= 0.666498  
Thermal correction to Gibbs Free Energy= 0.558594  
Sum of electronic and zero-point Energies= -1727.972521  
Sum of electronic and thermal Energies= -1727.936406  
Sum of electronic and thermal Enthalpies= -1727.935461  
Sum of electronic and thermal Free Energies= -1728.043365

Standard orientation:

| Center<br>Number | Atomic<br>Number | Atomic<br>Type | Coordinates (Angstroms) |           |           |
|------------------|------------------|----------------|-------------------------|-----------|-----------|
|                  |                  |                | X                       | Y         | Z         |
| 1                | 6                | 0              | -1.789340               | -1.225418 | 0.237052  |
| 2                | 6                | 0              | 3.213173                | 1.530547  | 1.036543  |
| 3                | 7                | 0              | -1.346091               | -2.325269 | 0.968599  |
| 4                | 6                | 0              | -0.840426               | -0.216567 | 0.360854  |
| 5                | 6                | 0              | 0.194049                | -0.721945 | 1.219363  |
| 6                | 6                | 0              | 1.380905                | -0.011751 | 1.780622  |
| 7                | 8                | 0              | 1.696845                | -0.123025 | 2.967590  |
| 8                | 6                | 0              | -0.136497               | -2.028966 | 1.566193  |
| 9                | 6                | 0              | -1.919285               | -3.663096 | 0.857798  |
| 10               | 6                | 0              | 0.660611                | -2.967060 | 2.442211  |
| 11               | 6                | 0              | 1.069065                | -4.297820 | 1.777171  |
| 12               | 6                | 0              | -0.015963               | -3.182696 | 3.809750  |
| 13               | 6                | 0              | 3.742821                | 2.132561  | -0.119017 |
| 14               | 6                | 0              | 4.864256                | 2.951389  | -0.032941 |
| 15               | 6                | 0              | 5.475224                | 3.186342  | 1.201556  |
| 16               | 6                | 0              | 4.946466                | 2.587602  | 2.346011  |
| 17               | 6                | 0              | 3.824006                | 1.761300  | 2.279455  |
| 18               | 6                | 0              | -0.999900               | 1.136813  | -0.230515 |
| 19               | 6                | 0              | -2.025816               | 2.026271  | 0.237107  |
| 20               | 6                | 0              | -0.207147               | 1.554262  | -1.289376 |
| 21               | 6                | 0              | -2.852787               | 1.707661  | 1.348733  |
| 22               | 6                | 0              | -2.227087               | 3.286483  | -0.417929 |
| 23               | 6                | 0              | -0.390361               | 2.801923  | -1.925169 |
| 24               | 6                | 0              | -3.836915               | 2.571543  | 1.772648  |
| 25               | 6                | 0              | -3.255432               | 4.152462  | 0.041691  |
| 26               | 6                | 0              | -1.388345               | 3.646260  | -1.504837 |
| 27               | 6                | 0              | -4.048602               | 3.804242  | 1.110165  |
| 28               | 7                | 0              | 2.076408                | 0.722786  | 0.858644  |
| 29               | 1                | 0              | 1.763655                | 0.631757  | -0.105557 |
| 30               | 8                | 0              | 0.874133                | 0.791156  | -1.719448 |

|    |   |   |           |           |           |
|----|---|---|-----------|-----------|-----------|
| 31 | 6 | 0 | 0.586584  | -0.353167 | -2.559782 |
| 32 | 1 | 0 | -2.920419 | -3.593083 | 0.436708  |
| 33 | 1 | 0 | -1.309402 | -4.291048 | 0.201409  |
| 34 | 1 | 0 | -1.982871 | -4.132289 | 1.841115  |
| 35 | 1 | 0 | 1.584172  | -2.422010 | 2.649656  |
| 36 | 1 | 0 | 0.244578  | -5.014335 | 1.713878  |
| 37 | 1 | 0 | 1.859438  | -4.771479 | 2.370518  |
| 38 | 1 | 0 | 1.458628  | -4.137657 | 0.764809  |
| 39 | 1 | 0 | -0.987664 | -3.682931 | 3.719748  |
| 40 | 1 | 0 | -0.166662 | -2.218451 | 4.303759  |
| 41 | 1 | 0 | 0.618723  | -3.804132 | 4.452515  |
| 42 | 1 | 0 | 3.265293  | 1.949666  | -1.078727 |
| 43 | 1 | 0 | 5.261388  | 3.408187  | -0.935984 |
| 44 | 1 | 0 | 6.350812  | 3.826133  | 1.268997  |
| 45 | 1 | 0 | 5.412520  | 2.761415  | 3.312803  |
| 46 | 1 | 0 | 3.418369  | 1.292587  | 3.164726  |
| 47 | 1 | 0 | -2.691491 | 0.769441  | 1.867000  |
| 48 | 1 | 0 | -4.455122 | 2.306902  | 2.626208  |
| 49 | 1 | 0 | -3.400304 | 5.102476  | -0.467547 |
| 50 | 1 | 0 | -1.539152 | 4.605890  | -1.992947 |
| 51 | 1 | 0 | -4.831345 | 4.475431  | 1.452905  |
| 52 | 1 | 0 | 0.277915  | 0.005326  | -3.550397 |
| 53 | 1 | 0 | -0.235897 | -0.922272 | -2.115529 |
| 54 | 1 | 0 | 0.278593  | 3.064398  | -2.738721 |
| 55 | 6 | 0 | -3.118619 | -1.150443 | -0.394600 |
| 56 | 6 | 0 | -4.277733 | -1.483467 | 0.330621  |
| 57 | 6 | 0 | -3.270189 | -0.665987 | -1.703873 |
| 58 | 6 | 0 | -5.541740 | -1.359788 | -0.243212 |
| 59 | 1 | 0 | -4.182170 | -1.813067 | 1.361866  |
| 60 | 6 | 0 | -4.535367 | -0.528433 | -2.271993 |
| 61 | 1 | 0 | -2.391018 | -0.382577 | -2.271748 |
| 62 | 6 | 0 | -5.675877 | -0.881277 | -1.548102 |
| 63 | 1 | 0 | -6.423497 | -1.619942 | 0.336360  |
| 64 | 1 | 0 | -4.629559 | -0.147090 | -3.285225 |
| 65 | 1 | 0 | -6.661245 | -0.776014 | -1.993561 |
| 66 | 6 | 0 | 1.833414  | -1.190719 | -2.632401 |
| 67 | 6 | 0 | 2.658022  | -1.168661 | -3.760575 |
| 68 | 6 | 0 | 2.200860  | -1.975549 | -1.530579 |
| 69 | 6 | 0 | 3.830929  | -1.926289 | -3.794492 |
| 70 | 1 | 0 | 2.382222  | -0.554996 | -4.615187 |
| 71 | 6 | 0 | 3.374890  | -2.725057 | -1.558571 |
| 72 | 1 | 0 | 1.568470  | -1.982223 | -0.647163 |
| 73 | 6 | 0 | 4.191295  | -2.704125 | -2.693125 |
| 74 | 1 | 0 | 4.464048  | -1.904501 | -4.677399 |
| 75 | 1 | 0 | 3.653702  | -3.323726 | -0.695349 |
| 76 | 1 | 0 | 5.106400  | -3.289733 | -2.716522 |

-----

Compound 1h GS3

Method: b3lyp/6-31g(d) EmpiricalDispersion=GD3 opt freq

SCF Done: E(RB3LYP) = -1728.60601994 A.U. after 1 cycles

Lowest frequency = 8.4703

|                                            |              |
|--------------------------------------------|--------------|
| Zero-point correction=                     | 0.629316     |
| (Hartree/Particle)                         |              |
| Thermal correction to Energy=              | 0.665480     |
| Thermal correction to Enthalpy=            | 0.666424     |
| Thermal correction to Gibbs Free Energy=   | 0.557441     |
| Sum of electronic and zero-point Energies= | -1727.976704 |

Sum of electronic and thermal Energies= -1727.940540  
Sum of electronic and thermal Enthalpies= -1727.939596  
Sum of electronic and thermal Free Energies= -1728.048579

Standard orientation:

| Center<br>Number | Atomic<br>Number | Atomic<br>Type | Coordinates (Angstroms) |           |           |
|------------------|------------------|----------------|-------------------------|-----------|-----------|
|                  |                  |                | X                       | Y         | Z         |
| 1                | 6                | 0              | -1.934620               | -1.429659 | 0.363417  |
| 2                | 6                | 0              | 2.366513                | 2.037840  | 1.318418  |
| 3                | 7                | 0              | -1.496443               | -2.500092 | 1.139096  |
| 4                | 6                | 0              | -0.980657               | -0.432441 | 0.443915  |
| 5                | 6                | 0              | 0.075810                | -0.919509 | 1.293951  |
| 6                | 6                | 0              | 1.355857                | -0.239142 | 1.583175  |
| 7                | 8                | 0              | 2.404143                | -0.840545 | 1.836575  |
| 8                | 6                | 0              | -0.274589               | -2.207255 | 1.705503  |
| 9                | 6                | 0              | -2.149010               | -3.802926 | 1.201703  |
| 10               | 6                | 0              | 0.435012                | -3.220830 | 2.574321  |
| 11               | 6                | 0              | 1.571011                | -3.916570 | 1.795224  |
| 12               | 6                | 0              | 0.930604                | -2.633902 | 3.908989  |
| 13               | 6                | 0              | 2.045541                | 3.298535  | 0.783203  |
| 14               | 6                | 0              | 3.046076                | 4.234502  | 0.538023  |
| 15               | 6                | 0              | 4.381496                | 3.931462  | 0.814911  |
| 16               | 6                | 0              | 4.697053                | 2.681627  | 1.349371  |
| 17               | 6                | 0              | 3.706310                | 1.734232  | 1.611249  |
| 18               | 6                | 0              | -1.058901               | 0.874712  | -0.254764 |
| 19               | 6                | 0              | -2.025010               | 1.863916  | 0.112133  |
| 20               | 6                | 0              | -0.149931               | 1.157461  | -1.276598 |
| 21               | 6                | 0              | -2.960329               | 1.661317  | 1.167402  |
| 22               | 6                | 0              | -2.050939               | 3.122492  | -0.579091 |
| 23               | 6                | 0              | -0.169803               | 2.405451  | -1.946872 |
| 24               | 6                | 0              | -3.875399               | 2.633147  | 1.500165  |
| 25               | 6                | 0              | -3.012817               | 4.102221  | -0.211428 |
| 26               | 6                | 0              | -1.103965               | 3.356824  | -1.605369 |
| 27               | 6                | 0              | -3.910291               | 3.866367  | 0.803074  |
| 28               | 7                | 0              | 1.301905                | 1.139691  | 1.521648  |
| 29               | 1                | 0              | 0.389838                | 1.527768  | 1.319666  |
| 30               | 8                | 0              | 0.731547                | 0.165168  | -1.580093 |
| 31               | 6                | 0              | 1.915191                | 0.477408  | -2.337190 |
| 32               | 1                | 0              | -2.585756               | -3.985231 | 2.189654  |
| 33               | 1                | 0              | -1.431470               | -4.596471 | 0.977850  |
| 34               | 1                | 0              | -2.943472               | -3.835373 | 0.457260  |
| 35               | 1                | 0              | -0.302173               | -3.989263 | 2.836980  |
| 36               | 1                | 0              | 2.322113                | -3.180040 | 1.503477  |
| 37               | 1                | 0              | 2.043398                | -4.685489 | 2.418806  |
| 38               | 1                | 0              | 1.190191                | -4.398759 | 0.886799  |
| 39               | 1                | 0              | 1.723709                | -1.902999 | 3.746883  |
| 40               | 1                | 0              | 0.110997                | -2.150314 | 4.452698  |
| 41               | 1                | 0              | 1.328784                | -3.438893 | 4.538060  |
| 42               | 1                | 0              | 1.010678                | 3.533648  | 0.546103  |
| 43               | 1                | 0              | 2.778376                | 5.202604  | 0.122545  |
| 44               | 1                | 0              | 5.162841                | 4.660506  | 0.619678  |
| 45               | 1                | 0              | 5.731007                | 2.434107  | 1.575851  |
| 46               | 1                | 0              | 3.950831                | 0.770049  | 2.032823  |
| 47               | 1                | 0              | -2.941000               | 0.721012  | 1.706359  |
| 48               | 1                | 0              | -4.580163               | 2.453933  | 2.307842  |
| 49               | 1                | 0              | -3.022541               | 5.047343  | -0.749824 |
| 50               | 1                | 0              | -1.117037               | 4.311597  | -2.125631 |

|    |   |   |           |           |           |
|----|---|---|-----------|-----------|-----------|
| 51 | 1 | 0 | -4.641707 | 4.622020  | 1.075801  |
| 52 | 1 | 0 | 2.442807  | 1.305130  | -1.844505 |
| 53 | 1 | 0 | 1.641611  | 0.791498  | -3.353362 |
| 54 | 1 | 0 | 0.548865  | 2.613318  | -2.730458 |
| 55 | 6 | 0 | -3.199350 | -1.411470 | -0.387702 |
| 56 | 6 | 0 | -4.428770 | -1.707684 | 0.226165  |
| 57 | 6 | 0 | -3.197462 | -1.032434 | -1.740774 |
| 58 | 6 | 0 | -5.620249 | -1.637052 | -0.494711 |
| 59 | 1 | 0 | -4.448167 | -1.973013 | 1.280119  |
| 60 | 6 | 0 | -4.390531 | -0.948184 | -2.455578 |
| 61 | 1 | 0 | -2.249976 | -0.807594 | -2.220139 |
| 62 | 6 | 0 | -5.605407 | -1.253845 | -1.837345 |
| 63 | 1 | 0 | -6.561939 | -1.867075 | -0.003228 |
| 64 | 1 | 0 | -4.371114 | -0.650300 | -3.500542 |
| 65 | 1 | 0 | -6.534560 | -1.191419 | -2.397302 |
| 66 | 6 | 0 | 2.758041  | -0.769071 | -2.379196 |
| 67 | 6 | 0 | 3.443223  | -1.185644 | -1.231433 |
| 68 | 6 | 0 | 2.828087  | -1.546347 | -3.539248 |
| 69 | 6 | 0 | 4.181062  | -2.368059 | -1.244861 |
| 70 | 1 | 0 | 3.384060  | -0.600097 | -0.320795 |
| 71 | 6 | 0 | 3.576300  | -2.725219 | -3.558020 |
| 72 | 1 | 0 | 2.291283  | -1.230333 | -4.431266 |
| 73 | 6 | 0 | 4.251472  | -3.139041 | -2.408503 |
| 74 | 1 | 0 | 4.698921  | -2.685855 | -0.344040 |
| 75 | 1 | 0 | 3.626981  | -3.320483 | -4.465997 |
| 76 | 1 | 0 | 4.830263  | -4.059116 | -2.419000 |

Compound 1h GS4

Method: b3lyp/6-31g(d) EmpiricalDispersion=GD3 opt freq

SCF Done: E(RB3LYP) = -1728.59904537 A.U. after 1 cycles

Lowest frequency = 12.8839

Zero-point correction= 0.629101  
(Hartree/Particle)  
Thermal correction to Energy= 0.665432  
Thermal correction to Enthalpy= 0.666376  
Thermal correction to Gibbs Free Energy= 0.557006  
Sum of electronic and zero-point Energies= -1727.969944  
Sum of electronic and thermal Energies= -1727.933613  
Sum of electronic and thermal Enthalpies= -1727.932669  
Sum of electronic and thermal Free Energies= -1728.042040

Standard orientation:

| Center<br>Number | Atomic<br>Number | Atomic<br>Type | Coordinates (Angstroms) |           |          |
|------------------|------------------|----------------|-------------------------|-----------|----------|
|                  |                  |                | X                       | Y         | Z        |
| 1                | 6                | 0              | 1.971639                | 1.151812  | 0.298281 |
| 2                | 6                | 0              | -3.104959               | -1.250704 | 1.202462 |
| 3                | 7                | 0              | 1.741702                | 2.221817  | 1.159383 |
| 4                | 6                | 0              | 0.929919                | 0.251931  | 0.437955 |
| 5                | 6                | 0              | 0.037215                | 0.799372  | 1.421499 |
| 6                | 6                | 0              | -1.205810               | 0.200298  | 1.967115 |
| 7                | 8                | 0              | -1.540980               | 0.312848  | 3.147989 |
| 8                | 6                | 0              | 0.560056                | 2.019229  | 1.844192 |
| 9                | 6                | 0              | 2.507683                | 3.462177  | 1.138198 |
| 10               | 6                | 0              | -0.022412               | 2.956107  | 2.876003 |
| 11               | 6                | 0              | -0.266272               | 4.399785  | 2.392040 |

|    |   |   |           |           |           |
|----|---|---|-----------|-----------|-----------|
| 12 | 6 | 0 | 0.775495  | 2.912849  | 4.194271  |
| 13 | 6 | 0 | -3.475161 | -2.102202 | 0.145507  |
| 14 | 6 | 0 | -4.628746 | -2.877323 | 0.229318  |
| 15 | 6 | 0 | -5.426215 | -2.830416 | 1.374762  |
| 16 | 6 | 0 | -5.047591 | -2.000011 | 2.431466  |
| 17 | 6 | 0 | -3.901113 | -1.208571 | 2.358752  |
| 18 | 6 | 0 | 0.922587  | -1.082079 | -0.218222 |
| 19 | 6 | 0 | 1.794922  | -2.119182 | 0.234989  |
| 20 | 6 | 0 | 0.123734  | -1.322216 | -1.329932 |
| 21 | 6 | 0 | 2.627037  | -1.961607 | 1.379078  |
| 22 | 6 | 0 | 1.846205  | -3.366419 | -0.472677 |
| 23 | 6 | 0 | 0.166181  | -2.549678 | -2.030811 |
| 24 | 6 | 0 | 3.465391  | -2.972417 | 1.789046  |
| 25 | 6 | 0 | 2.726585  | -4.388119 | -0.023585 |
| 26 | 6 | 0 | 1.018365  | -3.544347 | -1.606794 |
| 27 | 6 | 0 | 3.522626  | -4.198669 | 1.081146  |
| 28 | 7 | 0 | -1.949648 | -0.472922 | 1.023045  |
| 29 | 1 | 0 | -1.633065 | -0.371713 | 0.064271  |
| 30 | 8 | 0 | -0.719886 | -0.288564 | -1.677830 |
| 31 | 6 | 0 | -1.561465 | -0.400126 | -2.837799 |
| 32 | 1 | 0 | 3.462483  | 3.285437  | 0.645481  |
| 33 | 1 | 0 | 1.971888  | 4.242322  | 0.588649  |
| 34 | 1 | 0 | 2.696761  | 3.809350  | 2.155415  |
| 35 | 1 | 0 | -1.001205 | 2.529319  | 3.105161  |
| 36 | 1 | 0 | 0.652879  | 4.989826  | 2.325511  |
| 37 | 1 | 0 | -0.924987 | 4.913216  | 3.101944  |
| 38 | 1 | 0 | -0.753494 | 4.412913  | 1.410587  |
| 39 | 1 | 0 | 1.803749  | 3.273777  | 4.070509  |
| 40 | 1 | 0 | 0.813210  | 1.887179  | 4.573096  |
| 41 | 1 | 0 | 0.291970  | 3.541991  | 4.951164  |
| 42 | 1 | 0 | -2.831400 | -2.174932 | -0.727487 |
| 43 | 1 | 0 | -4.895952 | -3.528637 | -0.598990 |
| 44 | 1 | 0 | -6.324739 | -3.436951 | 1.444723  |
| 45 | 1 | 0 | -5.655875 | -1.959005 | 3.331588  |
| 46 | 1 | 0 | -3.609027 | -0.565583 | 3.176812  |
| 47 | 1 | 0 | 2.582146  | -1.029079 | 1.930572  |
| 48 | 1 | 0 | 4.088612  | -2.831756 | 2.668256  |
| 49 | 1 | 0 | 2.756544  | -5.326633 | -0.572634 |
| 50 | 1 | 0 | 1.058877  | -4.487136 | -2.146802 |
| 51 | 1 | 0 | 4.191498  | -4.986372 | 1.416849  |
| 52 | 1 | 0 | -2.192830 | -1.294611 | -2.758394 |
| 53 | 1 | 0 | -0.935899 | -0.497943 | -3.734532 |
| 54 | 1 | 0 | -0.457695 | -2.708753 | -2.902610 |
| 55 | 6 | 0 | 3.158864  | 1.011491  | -0.560798 |
| 56 | 6 | 0 | 4.462396  | 1.042582  | -0.037240 |
| 57 | 6 | 0 | 2.990470  | 0.772265  | -1.934557 |
| 58 | 6 | 0 | 5.567083  | 0.857657  | -0.867951 |
| 59 | 1 | 0 | 4.603337  | 1.185603  | 1.030995  |
| 60 | 6 | 0 | 4.094560  | 0.572804  | -2.761370 |
| 61 | 1 | 0 | 1.982840  | 0.745209  | -2.338384 |
| 62 | 6 | 0 | 5.386524  | 0.620561  | -2.232324 |
| 63 | 1 | 0 | 6.568556  | 0.881230  | -0.446440 |
| 64 | 1 | 0 | 3.947158  | 0.384940  | -3.821723 |
| 65 | 1 | 0 | 6.247223  | 0.468352  | -2.877998 |
| 66 | 6 | 0 | -2.404887 | 0.844870  | -2.880010 |
| 67 | 6 | 0 | -1.996518 | 1.956822  | -3.623003 |
| 68 | 6 | 0 | -3.577154 | 0.920372  | -2.117752 |
| 69 | 6 | 0 | -2.752462 | 3.129633  | -3.612396 |
| 70 | 1 | 0 | -1.081251 | 1.903852  | -4.208282 |

|    |   |   |           |          |           |
|----|---|---|-----------|----------|-----------|
| 71 | 6 | 0 | -4.331453 | 2.093195 | -2.101923 |
| 72 | 1 | 0 | -3.895882 | 0.062400 | -1.530387 |
| 73 | 6 | 0 | -3.920908 | 3.198787 | -2.850733 |
| 74 | 1 | 0 | -2.429706 | 3.987734 | -4.195768 |
| 75 | 1 | 0 | -5.238383 | 2.143059 | -1.505808 |
| 76 | 1 | 0 | -4.510263 | 4.111790 | -2.840819 |

-----

Compound 1h TS0

Method: b3lyp/6-31g(d) EmpiricalDispersion=GD3 opt(ts,noeigentest,addredun)

SCF Done: E(RB3LYP) = -1728.55452514 A.U. after 1 cycles

Lowest frequency = -12.5456

|                                              |              |
|----------------------------------------------|--------------|
| Zero-point correction=                       | 0.628569     |
| (Hartree/Particle)                           |              |
| Thermal correction to Energy=                | 0.663464     |
| Thermal correction to Enthalpy=              | 0.664408     |
| Thermal correction to Gibbs Free Energy=     | 0.561052     |
| Sum of electronic and zero-point Energies=   | -1727.925956 |
| Sum of electronic and thermal Energies=      | -1727.891061 |
| Sum of electronic and thermal Enthalpies=    | -1727.890117 |
| Sum of electronic and thermal Free Energies= | -1727.993473 |

Standard orientation:

| Center<br>Number | Atomic<br>Number | Atomic<br>Type | Coordinates (Angstroms) |           |           |
|------------------|------------------|----------------|-------------------------|-----------|-----------|
|                  |                  |                | X                       | Y         | Z         |
| 1                | 6                | 0              | 0.031299                | 2.788419  | -0.996145 |
| 2                | 6                | 0              | -0.468570               | 1.526562  | -0.702989 |
| 3                | 6                | 0              | 0.572665                | 0.752630  | -0.038130 |
| 4                | 6                | 0              | 1.642652                | 1.657716  | 0.135301  |
| 5                | 7                | 0              | 1.304001                | 2.858972  | -0.476849 |
| 6                | 6                | 0              | 2.830002                | 1.601283  | 1.016204  |
| 7                | 6                | 0              | 2.646166                | 1.377033  | 2.389414  |
| 8                | 6                | 0              | 4.133472                | 1.810280  | 0.539697  |
| 9                | 6                | 0              | 3.735372                | 1.337926  | 3.256118  |
| 10               | 6                | 0              | 5.224482                | 1.779362  | 1.407930  |
| 11               | 6                | 0              | 5.029244                | 1.538806  | 2.768693  |
| 12               | 6                | 0              | -1.944718               | 1.302244  | -0.774249 |
| 13               | 8                | 0              | -2.614958               | 1.402870  | -1.799692 |
| 14               | 6                | 0              | -0.592691               | 3.956572  | -1.731546 |
| 15               | 6                | 0              | -1.875572               | 4.486023  | -1.058645 |
| 16               | 6                | 0              | -0.827975               | 3.618255  | -3.218353 |
| 17               | 7                | 0              | -2.497056               | 1.085972  | 0.471601  |
| 18               | 6                | 0              | -3.789927               | 0.617868  | 0.779585  |
| 19               | 1                | 0              | -1.816276               | 0.964273  | 1.210096  |
| 20               | 6                | 0              | 2.103199                | 4.079735  | -0.447041 |
| 21               | 6                | 0              | -3.970654               | 0.001960  | 2.027575  |
| 22               | 6                | 0              | -5.218349               | -0.490981 | 2.395656  |
| 23               | 6                | 0              | -6.304785               | -0.379338 | 1.524819  |
| 24               | 6                | 0              | -6.122388               | 0.234277  | 0.284819  |
| 25               | 6                | 0              | -4.878662               | 0.738631  | -0.096862 |
| 26               | 1                | 0              | 1.640302                | 1.213395  | 2.764357  |
| 27               | 1                | 0              | 4.291628                | 1.976852  | -0.522627 |
| 28               | 1                | 0              | 3.574621                | 1.155673  | 4.315390  |
| 29               | 1                | 0              | 6.227209                | 1.937050  | 1.019479  |
| 30               | 1                | 0              | 0.130360                | 4.778544  | -1.706231 |
| 31               | 1                | 0              | -2.691998               | 3.765082  | -1.133150 |

|    |   |   |           |           |           |
|----|---|---|-----------|-----------|-----------|
| 32 | 1 | 0 | -2.197566 | 5.408566  | -1.555491 |
| 33 | 1 | 0 | -1.704856 | 4.710181  | 0.000429  |
| 34 | 1 | 0 | -1.542871 | 2.798123  | -3.308318 |
| 35 | 1 | 0 | 0.108813  | 3.317952  | -3.702422 |
| 36 | 1 | 0 | -1.219717 | 4.495791  | -3.747178 |
| 37 | 1 | 0 | 1.507298  | 4.914281  | -0.068380 |
| 38 | 1 | 0 | 2.953238  | 3.937561  | 0.216098  |
| 39 | 1 | 0 | 2.473249  | 4.330851  | -1.446602 |
| 40 | 1 | 0 | -3.120351 | -0.116566 | 2.695639  |
| 41 | 1 | 0 | -5.337574 | -0.972451 | 3.362612  |
| 42 | 1 | 0 | -7.279097 | -0.766370 | 1.809694  |
| 43 | 1 | 0 | -6.959492 | 0.327771  | -0.402347 |
| 44 | 1 | 0 | -4.735769 | 1.204880  | -1.061032 |
| 45 | 6 | 0 | 0.546670  | -0.658832 | 0.420262  |
| 46 | 6 | 0 | -0.641292 | -1.505581 | 0.390788  |
| 47 | 6 | 0 | 1.674061  | -1.318159 | 0.943640  |
| 48 | 6 | 0 | -1.608134 | -1.444878 | -0.645104 |
| 49 | 6 | 0 | -0.787831 | -2.567970 | 1.345066  |
| 50 | 6 | 0 | -2.737048 | -2.237519 | -0.636295 |
| 51 | 1 | 0 | -1.437863 | -0.794617 | -1.491963 |
| 52 | 6 | 0 | -1.986324 | -3.328865 | 1.369621  |
| 53 | 6 | 0 | 0.321172  | -2.920321 | 2.160466  |
| 54 | 6 | 0 | -2.960694 | -3.154058 | 0.412770  |
| 55 | 1 | 0 | -3.452764 | -2.153164 | -1.448495 |
| 56 | 1 | 0 | -2.093800 | -4.095003 | 2.134397  |
| 57 | 1 | 0 | 0.215014  | -3.706100 | 2.903890  |
| 58 | 1 | 0 | -3.869667 | -3.748214 | 0.434815  |
| 59 | 1 | 0 | 5.878862  | 1.510040  | 3.445496  |
| 60 | 8 | 0 | 2.973838  | -1.031492 | 0.604360  |
| 61 | 6 | 0 | 3.266153  | -0.980657 | -0.812275 |
| 62 | 1 | 0 | 4.358960  | -0.988162 | -0.840784 |
| 63 | 1 | 0 | 2.917515  | -0.031485 | -1.234145 |
| 64 | 6 | 0 | 1.545949  | -2.375415 | 1.875619  |
| 65 | 1 | 0 | 2.460774  | -2.737336 | 2.334536  |
| 66 | 6 | 0 | 2.678431  | -2.139271 | -1.578010 |
| 67 | 6 | 0 | 3.154434  | -3.438957 | -1.366771 |
| 68 | 6 | 0 | 1.610139  | -1.939556 | -2.458394 |
| 69 | 6 | 0 | 2.573760  | -4.520162 | -2.027495 |
| 70 | 1 | 0 | 3.973368  | -3.598890 | -0.669294 |
| 71 | 6 | 0 | 1.025894  | -3.019503 | -3.121855 |
| 72 | 1 | 0 | 1.220641  | -0.935011 | -2.604940 |
| 73 | 6 | 0 | 1.507081  | -4.311565 | -2.906676 |
| 74 | 1 | 0 | 2.949045  | -5.525704 | -1.856097 |
| 75 | 1 | 0 | 0.188549  | -2.852258 | -3.793718 |
| 76 | 1 | 0 | 1.050453  | -5.155124 | -3.417575 |

-----

Compound 1h TS180

Method: b3lyp/6-31g(d) EmpiricalDispersion=GD3 opt(ts,noeigentest,addredun)

SCF Done: E(RB3LYP) = -1728.55661565 A.U. after 1 cycles

Lowest frequency = -14.4160

|                                            |              |
|--------------------------------------------|--------------|
| Zero-point correction=                     | 0.628551     |
| (Hartree/Particle)                         |              |
| Thermal correction to Energy=              | 0.663550     |
| Thermal correction to Enthalpy=            | 0.664494     |
| Thermal correction to Gibbs Free Energy=   | 0.559775     |
| Sum of electronic and zero-point Energies= | -1727.928065 |
| Sum of electronic and thermal Energies=    | -1727.893065 |



Sum of electronic and thermal Enthalpies= -1727.892121  
Sum of electronic and thermal Free Energies= -1727.996840

Standard orientation:

| Center<br>Number | Atomic<br>Number | Atomic<br>Type | Coordinates (Angstroms) |           |           |
|------------------|------------------|----------------|-------------------------|-----------|-----------|
|                  |                  |                | X                       | Y         | Z         |
| 1                | 6                | 0              | -0.562479               | -2.866550 | -1.015985 |
| 2                | 6                | 0              | 0.129760                | -1.750415 | -0.578153 |
| 3                | 6                | 0              | -0.827179               | -0.713367 | -0.203883 |
| 4                | 6                | 0              | -2.092559               | -1.318464 | -0.357208 |
| 5                | 7                | 0              | -1.905159               | -2.596904 | -0.874953 |
| 6                | 6                | 0              | -3.450109               | -0.964908 | 0.120257  |
| 7                | 6                | 0              | -3.684318               | -0.848278 | 1.497846  |
| 8                | 6                | 0              | -4.528651               | -0.790074 | -0.763114 |
| 9                | 6                | 0              | -4.955622               | -0.541197 | 1.980477  |
| 10               | 6                | 0              | -5.801019               | -0.484496 | -0.281493 |
| 11               | 6                | 0              | -6.017134               | -0.356274 | 1.093083  |
| 12               | 6                | 0              | 1.593213                | -1.849613 | -0.284568 |
| 13               | 8                | 0              | 2.438688                | -2.185960 | -1.109449 |
| 14               | 6                | 0              | -0.071654               | -4.191555 | -1.561993 |
| 15               | 6                | 0              | 0.847195                | -4.951191 | -0.583885 |
| 16               | 6                | 0              | 0.592331                | -4.010558 | -2.942823 |
| 17               | 7                | 0              | 1.868338                | -1.681208 | 1.061823  |
| 18               | 6                | 0              | 3.118026                | -1.385756 | 1.641538  |
| 19               | 1                | 0              | 1.072651                | -1.374407 | 1.606667  |
| 20               | 6                | 0              | -2.955871               | -3.582937 | -1.107122 |
| 21               | 6                | 0              | 3.118847                | -0.697548 | 2.865760  |
| 22               | 6                | 0              | 4.318681                | -0.384673 | 3.498968  |
| 23               | 6                | 0              | 5.536459                | -0.746877 | 2.919396  |
| 24               | 6                | 0              | 5.532904                | -1.427628 | 1.700620  |
| 25               | 6                | 0              | 4.339313                | -1.756130 | 1.058082  |
| 26               | 1                | 0              | -2.852878               | -0.976390 | 2.184151  |
| 27               | 1                | 0              | -4.355217               | -0.871340 | -1.833245 |
| 28               | 1                | 0              | -5.115659               | -0.441056 | 3.050414  |
| 29               | 1                | 0              | -6.622238               | -0.341915 | -0.978845 |
| 30               | 1                | 0              | -0.950538               | -4.827002 | -1.712994 |
| 31               | 1                | 0              | 1.802408                | -4.439313 | -0.454585 |
| 32               | 1                | 0              | 1.053469                | -5.953313 | -0.977488 |
| 33               | 1                | 0              | 0.375026                | -5.060967 | 0.398976  |
| 34               | 1                | 0              | 1.477151                | -3.377718 | -2.850377 |
| 35               | 1                | 0              | -0.100603               | -3.540008 | -3.650535 |
| 36               | 1                | 0              | 0.887725                | -4.984994 | -3.350753 |
| 37               | 1                | 0              | -2.755247               | -4.495471 | -0.538413 |
| 38               | 1                | 0              | -3.911563               | -3.179868 | -0.781688 |
| 39               | 1                | 0              | -3.024407               | -3.834240 | -2.170378 |
| 40               | 1                | 0              | 2.173756                | -0.392338 | 3.310055  |
| 41               | 1                | 0              | 4.298901                | 0.150277  | 4.444981  |
| 42               | 1                | 0              | 6.473750                | -0.501314 | 3.410769  |
| 43               | 1                | 0              | 6.473784                | -1.715231 | 1.238127  |
| 44               | 1                | 0              | 4.337386                | -2.278385 | 0.112100  |
| 45               | 6                | 0              | -0.459734               | 0.647896  | 0.279002  |
| 46               | 6                | 0              | -1.387286               | 1.647447  | 0.797113  |
| 47               | 6                | 0              | 0.878620                | 1.078991  | 0.299488  |
| 48               | 6                | 0              | -2.705430               | 1.814045  | 0.304076  |
| 49               | 6                | 0              | -0.928708               | 2.634979  | 1.735861  |
| 50               | 6                | 0              | -3.571735               | 2.754785  | 0.822196  |
| 51               | 1                | 0              | -3.022135               | 1.224803  | -0.541026 |

|    |   |   |           |           |           |
|----|---|---|-----------|-----------|-----------|
| 52 | 6 | 0 | -1.854753 | 3.548642  | 2.303500  |
| 53 | 6 | 0 | 0.463377  | 2.764098  | 1.987051  |
| 54 | 6 | 0 | -3.163537 | 3.597498  | 1.876758  |
| 55 | 1 | 0 | -4.568768 | 2.848958  | 0.401098  |
| 56 | 1 | 0 | -1.490048 | 4.254446  | 3.046454  |
| 57 | 1 | 0 | 0.814602  | 3.493564  | 2.712030  |
| 58 | 1 | 0 | -3.856324 | 4.317498  | 2.303860  |
| 59 | 1 | 0 | -7.007313 | -0.113351 | 1.468758  |
| 60 | 8 | 0 | 1.851914  | 0.556918  | -0.519221 |
| 61 | 6 | 0 | 1.646756  | 0.763791  | -1.941576 |
| 62 | 1 | 0 | 2.456802  | 0.192741  | -2.397777 |
| 63 | 1 | 0 | 0.696028  | 0.311920  | -2.244181 |
| 64 | 6 | 0 | 1.340982  | 2.070783  | 1.196881  |
| 65 | 1 | 0 | 2.411901  | 2.240128  | 1.227439  |
| 66 | 6 | 0 | 1.700200  | 2.227473  | -2.292395 |
| 67 | 6 | 0 | 0.524976  | 2.985421  | -2.363236 |
| 68 | 6 | 0 | 2.932756  | 2.866158  | -2.474587 |
| 69 | 6 | 0 | 0.579201  | 4.356563  | -2.616617 |
| 70 | 1 | 0 | -0.434233 | 2.500141  | -2.202057 |
| 71 | 6 | 0 | 2.990922  | 4.235572  | -2.732181 |
| 72 | 1 | 0 | 3.848594  | 2.283444  | -2.407542 |
| 73 | 6 | 0 | 1.812634  | 4.983446  | -2.803491 |
| 74 | 1 | 0 | -0.340010 | 4.934353  | -2.664637 |
| 75 | 1 | 0 | 3.953191  | 4.719875  | -2.876794 |
| 76 | 1 | 0 | 1.856717  | 6.050992  | -3.003137 |

---
